# Supplementary material for: Elevated ubiquitin phosphorylation by PINK1 contributes to proteasomal impairment and promotes neurodegeneration
Source: eLife. 2025 Jul 31;14:RP103945. doi: 10.7554/eLife.103945 (PMC12313235; doi:10.7554/eLife.103945)
Supplement: Figure 5—source data 1. [file elife-103945-fig5-data1.xlsx]

## Sheet: Sheet1
Figure 5-source data 1 Relative protein expression levels upon sPINK1 over-expression in mouse hippocampus. The mice were sacrificed on the 30th and 70th day of AAV transfection. The values are arbiturary and are refencned to eGFP transfection, and a missing value indicates that the protein was not detected. A fold-change (FC) >1 means increased protein expression, and <1 means decreased expressi…
Uniprot ID	Symbol	Gene name	Protein names	EGFP-AAV_30d	sPink1-AAV_30d	FC_30d	EGFP-AAV_70d	sPink1-AAV_70d	FC_70d
Q6P5B0	RRP12	Rrp12	RRP12-like protein	678411	5.93344e+06	8.74609	506221	3.21171e+09	6344.5
Q0VF58	COJA1	Col19a1	Collagen alpha-1(XIX) chain (Collagen alpha-1(Y) chain)				506221	1.5567e+09	3075.15
Q9Z172	SUMO3	Sumo3	Small ubiquitin-related modifier 3 (SUMO-3) (SMT3 homolog 1) (Ubiquitin-like protein SMT3A) (Smt3A)	9.34783e+08	9.9161e+08	1.06079	506221	1.45987e+09	2883.86
P63158	HMGB1	Hmgb1	High mobility group protein B1 (High mobility group protein 1) (HMG-1)	678411	1.02481e+09	1510.6	506221	1.34881e+09	2664.48
Q66X03	NLR9A	Nlrp9a	NACHT, LRR and PYD domains-containing protein 9A (NALP-theta)				506221	1.02076e+09	2016.43
Q64522	H2A2B	H2ac21	Histone H2A type 2-B (H2A-clustered histone 21) (H2a-613A)	2.44875e+07	678411	0.0277044	506221	6.78792e+08	1340.9
P13020	GELS	Gsn	Gelsolin (Actin-depolymerizing factor) (ADF) (Brevin)	2.40247e+08	678411	0.0028238	506221	6.0003e+08	1185.31
E9Q5K9	YTDC1	Ythdc1	YTH domain-containing protein 1				506221	3.96545e+08	783.344
P28776	I23O1	Ido1	Indoleamine 2,3-dioxygenase 1 (IDO-1) (EC 1.13.11.52) (Indoleamine-pyrrole 2,3-dioxygenase)				506221	3.16093e+08	624.418
Q8R429	AT2A1	Atp2a1	Sarcoplasmic/endoplasmic reticulum calcium ATPase 1 (SERCA1) (SR Ca(2+)-ATPase 1) (EC 7.2.2.10) (Calcium pump 1) (Calcium-transporting ATPase sarcoplasmic reticulum type, fast twitch skeletal muscle isoform) (Endoplasmic reticulum class 1/2 Ca(2+) ATPase)				506221	2.93271e+08	579.334
P62889	RL30	Rpl30	60S ribosomal protein L30	2.75133e+08	2.58625e+08	0.939998	506221	2.44077e+08	482.155
Q923B1	DBR1	Dbr1	Lariat debranching enzyme (EC 3.1.-.-)	678411	1.9714e+08	290.591	506221	243183833	480.391
Q99MQ3	PINK1	Pink1	Serine/threonine-protein kinase PINK1, mitochondrial (EC 2.7.11.1) (BRPK) (PTEN-induced putative kinase protein 1)	678411	5.27228e+08	777.151	506221	2.36925e+08	468.026
Q8BGZ7	K2C75	Krt75	Keratin, type II cytoskeletal 75 (Cytokeratin-75) (CK-75) (Keratin-6 hair follicle) (mK6hf) (Keratin-75) (K75) (Type II keratin-K6hf) (Type-II keratin Kb18)				506221	2.09924e+08	414.688
Q8BQR7	MAGBI	Mageb18	Melanoma-associated antigen B18 (MAGE-B18 antigen)				506221	1.90208e+08	375.741
Q8BR65	SDS3	Suds3	Sin3 histone deacetylase corepressor complex component SDS3 (Suppressor of defective silencing 3 protein homolog)				506221	1.64698e+08	325.348
P63154	CRNL1	Crnkl1	Crooked neck-like protein 1 (Crooked neck homolog)	1.79801e+10	1.98547e+10	1.10426	506221	1.64384e+08	324.728
Q3V132	ADT4	Slc25a31	ADP/ATP translocase 4 (ADP,ATP carrier protein 4) (Adenine nucleotide translocator 4) (ANT 4) (Solute carrier family 25 member 31) (Sperm flagellar energy carrier protein)	1.32745e+08	1.28262e+08	0.966227	506221	1.64097e+08	324.161
Q5SS00	ZDBF2	Zdbf2	DBF4-type zinc finger-containing protein 2 homolog				506221	1.61783e+08	319.589
A2AKX3	SETX	Setx	Probable helicase senataxin (EC 3.6.4.-) (Amyotrophic lateral sclerosis 4 protein homolog) (SEN1 homolog)				506221	1.49953e+08	296.222
P97470	PP4C	Ppp4c	Serine/threonine-protein phosphatase 4 catalytic subunit (PP4C) (Pp4) (EC 3.1.3.16) (Protein phosphatase X) (PP-X)	2.84915e+07	1.25123e+07	0.43916	1.53245e+07	4.14993e+09	270.804
Q6A039	TBC12	Tbc1d12	TBC1 domain family member 12				506221	1.30233e+08	257.265
Q63886	UD11	Ugt1a1	UDP-glucuronosyltransferase 1A1 (UGT1A1) (EC 2.4.1.17) (UDP-glucuronosyltransferase 1-1) (UDPGT 1-1) (UGT1*1) (UGT1-01) (UGT1.1) (UGTBR1)				506221	1.25275e+08	247.471
Q99PF4	CAD23	Cdh23	Cadherin-23 (Otocadherin)	3.71292e+06	678411	0.182716	506221	1.20891e+08	238.812
P62305	RUXE	Snrpe	Small nuclear ribonucleoprotein E (snRNP-E) (Sm protein E) (Sm-E) (SmE)	1.34566e+08	3.57799e+08	2.65892	506221	1.10664e+08	218.608
O88653	LTOR3	Lamtor3	Ragulator complex protein LAMTOR3 (Late endosomal/lysosomal adaptor and MAPK and MTOR activator 3) (MEK-binding partner 1) (Mp1) (Mitogen-activated protein kinase kinase 1-interacting protein 1) (Mitogen-activated protein kinase scaffold protein 1)	7.94538e+07	678411	0.00853844	506221	9.00712e+07	177.929
Q8BUH8	SENP7	Senp7	Sentrin-specific protease 7 (EC 3.4.22.-) (SUMO-1-specific protease 2) (Sentrin/SUMO-specific protease SENP7)	7.00959e+06	678411	0.0967832	506221	8.94643e+07	176.73
Q920B0	FRM4B	Frmd4b	FERM domain-containing protein 4B (GRP1-binding protein GRSP1) (Golgi-associated band 4.1-like protein) (GOBLIN)				506221	8.68093e+07	171.485
Q8BGS0	MAK16	Mak16	Protein MAK16 homolog (Protein RBM13)				506221	8.0351e+07	158.727
Q9D361	SNR48	Snrnp48	U11/U12 small nuclear ribonucleoprotein 48 kDa protein (U11/U12 snRNP 48 kDa protein)				506221	7.73529e+07	152.805
Q9ERR1	NDEL1	Ndel1	Nuclear distribution protein nudE-like 1 (Protein mNudE-like) (Protein Nudel) (mNudE-L)	7.14778e+07	8.3171e+07	1.16359	506221	7.5046e+07	148.248
P54830	PTN5	Ptpn5	Tyrosine-protein phosphatase non-receptor type 5 (EC 3.1.3.48) (Neural-specific protein-tyrosine phosphatase) (Striatum-enriched protein-tyrosine phosphatase) (STEP)	678411	7.58523e+06	11.1809	506221	7.47282e+07	147.62
Q8CFR0	C1QL2	C1ql2	Complement C1q-like protein 2 (C1q and tumor necrosis factor-related protein 10) (C1q/TNF-related protein 10) (C1qTNF10) (CTRP10)	5.47339e+06	678411	0.123947	506221	6.98434e+07	137.97
Q91W39	NCOA5	Ncoa5	Nuclear receptor coactivator 5 (NCoA-5) (Coactivator independent of AF-2) (CIA)	2.54476e+07	9.55931e+07	3.75647	506221	6.9172e+07	136.644
Q8BP71	RFOX2	Rbfox2	RNA binding protein fox-1 homolog 2 (Fox-1 homolog B) (Fox-1 homolog Fxh) (Hexaribonucleotide-binding protein 2) (RNA-binding motif protein 9) (RNA-binding protein 9)				506221	6.53575e+07	129.109
P0C8K7	SMIM1	Smim1	Small integral membrane protein 1	3.76946e+07	4.22576e+07	1.12105	506221	6.19e+07	122.279
Q9EPV8	UBL5	Ubl5	Ubiquitin-like protein 5	2.60308e+07	3.77794e+07	1.45134	506221	6.05876e+07	119.686
Q9Z1K6	ARI2	Arih2	E3 ubiquitin-protein ligase ARIH2 (ARI-2) (Protein ariadne-2 homolog) (EC 2.3.2.31) (RING-type E3 ubiquitin transferase ARIH2) (Triad1 protein) (UbcM4-interacting protein 48)	678411	1.7508e+07	25.8074	506221	6.02157e+07	118.952
Q9D7J7	CPNS2	Capns2	Calpain small subunit 2 (CSS2) (Calcium-dependent protease small subunit 2)				506221	5.96778e+07	117.889
O88951	LIN7B	Lin7b	Protein lin-7 homolog B (Lin-7B) (Mammalian lin-seven protein 2) (MALS-2) (Vertebrate lin-7 homolog 2) (Veli-2)	8.35578e+07	5.90985e+07	0.707277	506221	5.89639e+07	116.479
Q7M750	OPALI	Opalin	Opalin (Oligodendrocytic myelin paranodal and inner loop protein) (Transmembrane protein 10)	4.00067e+07	7.4916e+07	1.87259	506221	5.44297e+07	107.522
P62313	LSM6	Lsm6	U6 snRNA-associated Sm-like protein LSm6	4.71167e+07	678411	0.0143985	506221	5.39005e+07	106.476
Q3UJF0	GPR55	Gpr55	G-protein coupled receptor 55				506221	5.17632e+07	102.254
P63115	AAA1	Slc7a10	Asc-type amino acid transporter 1 (Asc-1) (D-serine transporter) (Solute carrier family 7 member 10)	4.44136e+07	9.16213e+07	2.06291	506221	4.99952e+07	98.7617
P13011	SCD2	Scd2	Stearoyl-CoA desaturase 2 (EC 1.14.19.1) (Acyl-CoA desaturase 2) (Delta(9)-desaturase 2) (Delta-9 desaturase 2) (Fatty acid desaturase 2)	678411	2.80816e+07	41.3932	506221	4.64553e+07	91.7689
Q8CFQ3	AQR	Aqr	RNA helicase aquarius (EC 3.6.4.13) (Intron-binding protein of 160 kDa)	678411	6.46134e+06	9.52422	506221	4.64286e+07	91.7161
D3Z7Q2	SIM20	Smim20	Small integral membrane protein 20 (Mitochondrial translation regulation assembly intermediate of cytochrome c oxidase protein of 7 kDa) (MITRAC7) [Cleaved into: Phoenixin-14 (PNX-14); Phoenixin-20 (PNX-20)]	4.9217e+07	678411	0.0137841	506221	4.62553e+07	91.3738
Q9CYR0	SSBP	Ssbp1	Single-stranded DNA-binding protein, mitochondrial (Mt-SSB) (MtSSB)	7.18596e+07	6.77401e+07	0.942672	506221	4.58238e+07	90.5214
P60041	SMS	Sst	Somatostatin [Cleaved into: Antrin; Somatostatin-28; Somatostatin-14; Neuronostatin (NST)]				506221	4.55785e+07	90.0368
P01887	B2MG	B2m	Beta-2-microglobulin	3.965e+07	5.66768e+07	1.42943	506221	4.47326e+07	88.3658
Q8BGL1	PPM1N	Ppm1n	Probable protein phosphatase 1N (EC 3.1.3.16)				506221	4.41224e+07	87.1605
Q8BJU2	TSN9	Tspan9	Tetraspanin-9 (Tspan-9) (Tetraspan NET-5)	678411	4.72652e+07	69.6705	506221	4.32014e+07	85.3411
Q6P5D4	CP135	Cep135	Centrosomal protein of 135 kDa (Cep135) (Centrosomal protein 4)				506221	4.27769e+07	84.5025
Q99NF3	CEP41	Cep41	Centrosomal protein of 41 kDa (Cep41) (Testis-specific gene A14 protein)				506221	4.08087e+07	80.6145
Q8CHP5	PYM1	Pym1	Partner of Y14 and mago (PYM homolog 1 exon junction complex-associated factor) (Protein wibg homolog)				506221	4.06714e+07	80.3432
Q91W82	UB2E2	Ube2e2	Ubiquitin-conjugating enzyme E2 E2 (EC 2.3.2.23) (E2 ubiquitin-conjugating enzyme E2) (Ubiquitin carrier protein E2) (Ubiquitin-protein ligase E2)	678411	9.33227e+06	13.7561	506221	4.05473e+07	80.0981
P30681	HMGB2	Hmgb2	High mobility group protein B2 (High mobility group protein 2) (HMG-2)				506221	4.02248e+07	79.461
P07214	SPRC	Sparc	SPARC (Basement-membrane protein 40) (BM-40) (Osteonectin) (ON) (Secreted protein acidic and rich in cysteine)	678411	2.58318e+07	38.077	506221	3.97621e+07	78.547
Q8CAY6	THIC	Acat2	Acetyl-CoA acetyltransferase, cytosolic (EC 2.3.1.9) (Cytosolic acetoacetyl-CoA thiolase)	8.7629e+07	3.54515e+08	4.04564	506221	39473933	77.9777
P48543	KCNJ9	Kcnj9	G protein-activated inward rectifier potassium channel 3 (GIRK-3) (Inward rectifier K(+) channel Kir3.3) (Potassium channel, inwardly rectifying subfamily J member 9)	2.85749e+07	3.56559e+07	1.24781	506221	3.89683e+07	76.9789
Q9CQJ4	RING2	Rnf2	E3 ubiquitin-protein ligase RING2 (EC 2.3.2.27) (RING finger protein 1B) (RING1b) (RING finger protein 2) (RING-type E3 ubiquitin transferase RING2)				506221	3.7865e+07	74.7993
Q3TWW8	SRSF6	Srsf6	Serine/arginine-rich splicing factor 6 (Pre-mRNA-splicing factor SRP55) (Splicing factor, arginine/serine-rich 6)	3.70513e+07	3.6849e+07	0.994538	506221	3.78345e+07	74.7391
P22933	GBRD	Gabrd	Gamma-aminobutyric acid receptor subunit delta (GABA(A) receptor subunit delta)	1.20784e+07	678411	0.0561673	506221	3.76035e+07	74.2828
Q9WU01	KHDR2	Khdrbs2	KH domain-containing, RNA-binding, signal transduction-associated protein 2 (Sam68-like mammalian protein 1) (SLM-1) (mSLM-1)				506221	3.74954e+07	74.0693
Q8BGT7	SPF30	Smndc1	Survival of motor neuron-related-splicing factor 30 (30 kDa splicing factor SMNrp) (SMN-related protein) (Survival motor neuron domain-containing protein 1)	678411	4.23819e+07	62.4724	506221	3.74244e+07	73.929
Q78TU8	F107A	Fam107a	Actin-associated protein FAM107A				506221	3.56537e+07	70.4311
Q91VC9	GHITM	Ghitm	Growth hormone-inducible transmembrane protein (Mitochondrial morphology and cristae structure 1) (MICS1)	678411	6.35724e+07	93.7078	506221	3.55763e+07	70.2782
Q61704	ITIH3	Itih3	Inter-alpha-trypsin inhibitor heavy chain H3 (ITI heavy chain H3) (ITI-HC3) (Inter-alpha-inhibitor heavy chain 3)	1.27486e+07	3.30394e+07	2.5916	506221	3.55725e+07	70.2707
P35123	UBP4	Usp4	Ubiquitin carboxyl-terminal hydrolase 4 (EC 3.4.19.12) (Deubiquitinating enzyme 4) (Ubiquitin thioesterase 4) (Ubiquitin-specific-processing protease 4) (Ubiquitous nuclear protein)	2.93217e+07	2.95146e+07	1.00658	506221	3.50605e+07	69.2594
P70265	F262	Pfkfb2	6-phosphofructo-2-kinase/fructose-2,6-bisphosphatase 2 (6PF-2-K/Fru-2,6-P2ase 2) (PFK/FBPase 2) (6PF-2-K/Fru-2,6-P2ase heart-type isozyme) [Includes: 6-phosphofructo-2-kinase (EC 2.7.1.105); Fructose-2,6-bisphosphatase (EC 3.1.3.46)]	2.17611e+07	1.8147e+07	0.83392	506221	3.50061e+07	69.1519
Q9JI75	NQO2	Nqo2	Ribosyldihydronicotinamide dehydrogenase [quinone] (EC 1.10.5.1) (NRH dehydrogenase [quinone] 2) (NRH:quinone oxidoreductase 2) (Quinone reductase 2) (QR2)	4.87953e+07	5.07899e+07	1.04088	506221	3.49395e+07	69.0202
Q9JHR9	NRIP2	Nrip2	Nuclear receptor-interacting protein 2 (Neuronal-interacting factor X 1)				506221	3.40022e+07	67.1688
O08581	KCNK1	Kcnk1	Potassium channel subfamily K member 1 (Inward rectifying potassium channel protein TWIK-1)				506221	3.29614e+07	65.1127
Q9D387	LAMP5	Lamp5	Lysosome-associated membrane glycoprotein 5 (Brain and dendritic cell-associated LAMP) (Brain-associated LAMP-like protein) (BAD-LAMP) (Lysosome-associated membrane protein 5) (LAMP-5)	5.89023e+07	57623164	0.978284	506221	3.25897e+07	64.3784
Q9JHG6	RCAN1	Rcan1	Calcipressin-1 (Down syndrome critical region protein 1 homolog) (Myocyte-enriched calcineurin-interacting protein 1) (MCIP1) (Regulator of calcineurin 1)	2.95146e+07	2.34795e+07	0.795521	506221	3.25344e+07	64.2692
Q8CH25	SLTM	Sltm	SAFB-like transcription modulator (Modulator of estrogen-induced transcription) (SAF-like transcription modulator)	8.72055e+07	3.99498e+07	0.458111	506221	3.23943e+07	63.9925
Q8BQU6	CXG2	Gjc2	Gap junction gamma-2 protein (Connexin-47) (Cx47) (Gap junction alpha-12 protein)				506221	3.19805e+07	63.1751
P04919	B3AT	Slc4a1	Band 3 anion transport protein (Anion exchange protein 1) (AE 1) (Anion exchanger 1) (MEB3) (Solute carrier family 4 member 1) (CD antigen CD233)	7.03716e+06	678411	0.0964041	506221	3.15357e+07	62.2963
Q9CXU9	EIF1B	Eif1b	Eukaryotic translation initiation factor 1b (eIF1b)	1.67167e+06	678411	0.405829	506221	3.11197e+07	61.4746
Q9ERG2	STRN3	Strn3	Striatin-3 (Cell cycle autoantigen SG2NA) (S/G2 antigen)	678411	5.04099e+07	74.3059	506221	3.05853e+07	60.4188
Q8C031	LRC4C	Lrrc4c	Leucine-rich repeat-containing protein 4C (Netrin-G1 ligand) (NGL-1)	2.63052e+07	1.47867e+07	0.56212	506221	3.05441e+07	60.3376
Q9CQG6	TM147	Tmem147	Transmembrane protein 147	678411	5.80195e+06	8.55227	506221	2.92743e+07	57.8292
Q9CXE7	TMED5	Tmed5	Transmembrane emp24 domain-containing protein 5 (p24 family protein gamma-2) (p24gamma2)	1.93291e+07	2.05966e+07	1.06557	506221	2.90926e+07	57.4701
Q60953	PML	Pml	Protein PML				506221	2.907e+07	57.4256
Q8BFV2	PCID2	Pcid2	PCI domain-containing protein 2 (CSN12-like protein)	678411	2.36039e+07	34.793	506221	2.8814e+07	56.9199
Q61286	HTF4	Tcf12	Transcription factor 12 (TCF-12) (Class A helix-loop-helix transcription factor ME1) (DNA-binding protein HTF4) (E-box-binding protein) (Transcription factor HTF-4)	2.28202e+07	678411	0.0297285	506221	2.85867e+07	56.4709
Q8VHE6	DYH5	Dnah5	Dynein axonemal heavy chain 5 (Axonemal beta dynein heavy chain 5) (mDNAH5) (Ciliary dynein heavy chain 5)				506221	2.85138e+07	56.3269
Q07079	IBP5	Igfbp5	Insulin-like growth factor-binding protein 5 (IBP-5) (IGF-binding protein 5) (IGFBP-5)	678411	1.1314e+09	1667.72	506221	2.83681e+07	56.039
E9Q612	PTPRO	Ptpro	Receptor-type tyrosine-protein phosphatase O (R-PTP-O) (EC 3.1.3.48) (Glomerular epithelial protein 1) (Protein tyrosine phosphatase U2) (PTP-U2) (PTPase U2)				506221	2.83459e+07	55.9952
Q9DB26	PHYD1	Phyhd1	Phytanoyl-CoA dioxygenase domain-containing protein 1 (EC 1.-.-.-)	7.36469e+06	6.52715e+06	0.886277	506221	2.81945e+07	55.6961
Q91X52	DCXR	Dcxr	L-xylulose reductase (XR) (EC 1.1.1.10) (Dicarbonyl/L-xylulose reductase)	7.66785e+06	6.62523e+06	0.864027	542195	3.00488e+07	55.4206
Q9CQ85	TIM22	Timm22	Mitochondrial import inner membrane translocase subunit Tim22	1.43555e+08	1.4445e+08	1.00624	506221	2.78503e+07	55.016
Q8C0Z1	F234A	Fam234a	Protein FAM234A (Protein ITFG3)				506221	2.78242e+07	54.9646
Q8R4I7	NETO1	Neto1	Neuropilin and tolloid-like protein 1 (Brain-specific transmembrane protein containing 2 CUB and 1 LDL-receptor class A domains protein 1)	678411	2.99562e+07	44.1565	506221	2.76069e+07	54.5352
Q6QWF9	CK2N1	Camk2n1	Calcium/calmodulin-dependent protein kinase II inhibitor 1 (calcium/calmodulin-dependent protein kinase II inhibitor alpha) (mCaMKIINalpha)				506221	2.75496e+07	54.4221
P40338	VHL	Vhl	von Hippel-Lindau disease tumor suppressor (pVHL)				506221	2.71405e+07	53.6139
P17439	GLCM	Gba	Lysosomal acid glucosylceramidase (Lysosomal acid GCase) (EC 3.2.1.45) (Acid beta-glucosidase) (Beta-glucocerebrosidase) (Cholesterol glucosyltransferase) (SGTase) (EC 2.4.1.-) (Cholesteryl-beta-glucosidase) (EC 3.2.1.-) (D-glucosyl-N-acylsphingosine glucohydrolase)	7.83366e+06	1.00956e+07	1.28875	506221	2.67485e+07	52.8396
O08967	CYH3	Cyth3	Cytohesin-3 (ARF nucleotide-binding site opener 3) (Protein ARNO3) (General receptor of phosphoinositides 1) (Grp1) (PH, SEC7 and coiled-coil domain-containing protein 3) (CLM3) (SEC7 homolog C) (mSec7-3)	4.38695e+07	4.08535e+07	0.931252	506221	2.67119e+07	52.7672
Q9D1I6	RM14	Mrpl14	39S ribosomal protein L14, mitochondrial (L14mt) (MRP-L14)	3.04675e+07	2.59437e+07	0.85152	506221	2.64718e+07	52.293
Q9QXJ1	APBB1	Apbb1	Amyloid beta precursor protein binding family B member 1 (Amyloid-beta A4 precursor protein-binding family B member 1) (Protein Fe65)	4.09335e+07	4.71959e+07	1.15299	506221	2.63047e+07	51.963
P60605	UB2G2	Ube2g2	Ubiquitin-conjugating enzyme E2 G2 (EC 2.3.2.23) (E2 ubiquitin-conjugating enzyme G2) (Ubiquitin carrier protein G2) (Ubiquitin-protein ligase G2)	678411	3.05334e+07	45.0073	506221	2.56337e+07	50.6375
P31725	S10A9	S100a9	Protein S100-A9 (Calgranulin-B) (Leukocyte L1 complex heavy chain) (Migration inhibitory factor-related protein 14) (MRP-14) (p14) (S100 calcium-binding protein A9)				506221	2.54385e+07	50.2518
Q8BXK8	AGAP1	Agap1	Arf-GAP with GTPase, ANK repeat and PH domain-containing protein 1 (AGAP-1) (Centaurin-gamma-2) (Cnt-g2)	2.86544e+07	2.50243e+07	0.873314	506221	2.53505e+07	50.0779
Q8BUN5	SMAD3	Smad3	Mothers against decapentaplegic homolog 3 (MAD homolog 3) (Mad3) (Mothers against DPP homolog 3) (mMad3) (SMAD family member 3) (SMAD 3) (Smad3)	678411	1.02989e+07	15.1809	506221	2.50016e+07	49.3888
Q8CI43	MYL6B	Myl6b	Myosin light chain 6B (Smooth muscle and nonmuscle myosin light chain alkali 6B)	2.25316e+07	678411	0.0301093	506221	2.49864e+07	49.3587
Q61701	ELAV4	Elavl4	ELAV-like protein 4 (Hu-antigen D) (HuD) (Paraneoplastic encephalomyelitis antigen HuD)	7.82765e+08	5.51432e+07	0.0704467	506221	2.48931e+07	49.1744
P60330	ESPL1	Espl1	Separin (EC 3.4.22.49) (Caspase-like protein ESPL1) (Extra spindle poles-like 1 protein) (Separase)	2.0602e+07	1.91783e+07	0.930893	506221	2.46876e+07	48.7685
Q3UM29	COG7	Cog7	Conserved oligomeric Golgi complex subunit 7 (COG complex subunit 7) (Component of oligomeric Golgi complex 7)	5119134	678411	0.132525	506221	24261060	47.9259
Q9D2P4	URM1	Urm1	Ubiquitin-related modifier 1	1.47095e+07	1.45033e+07	0.985981	506221	2.42476e+07	47.8994
Q9EQI8	RM46	Mrpl46	39S ribosomal protein L46, mitochondrial (L46mt) (MRP-L46)	3.45762e+07	3.60434e+07	1.04243	506221	2.42113e+07	47.8276
Q9QUK3	CLN8	Cln8	Protein CLN8				506221	2.40544e+07	47.5176
Q8K1L6	CP074		Uncharacterized protein C16orf74 homolog				506221	2.38896e+07	47.1921
Q6PFD9	NUP98	Nup98	Nuclear pore complex protein Nup98-Nup96 (EC 3.4.21.-) [Cleaved into: Nuclear pore complex protein Nup98 (98 kDa nucleoporin) (Nucleoporin Nup98) (Nup98); Nuclear pore complex protein Nup96 (96 kDa nucleoporin) (Nucleoporin Nup96) (Nup96)]	5.93344e+06	678411	0.114337	506221	2.37829e+07	46.9812
Q9JLH8	TMOD4	Tmod4	Tropomodulin-4 (Skeletal muscle tropomodulin) (Sk-Tmod)	2.50919e+07	3.42681e+07	1.36571	506221	2.37069e+07	46.8312
Q9JIZ9	PLS3	Plscr3	Phospholipid scramblase 3 (PL scramblase 3) (Ca(2+)-dependent phospholipid scramblase 3)	678411	2.06619e+07	30.4563	506221	2.35554e+07	46.5318
P63024	VAMP3	Vamp3	Vesicle-associated membrane protein 3 (VAMP-3) (Cellubrevin) (CEB) (Synaptobrevin-3)	2.8345e+07	1.21021e+07	0.426956	506221	2.30991e+07	45.6305
E9Q137	TX264	Tex264	Testis-expressed protein 264 homolog	678411	2.08673e+07	30.7591	506221	22987327	45.4097
P32211	ACM4	Chrm4	Muscarinic acetylcholine receptor M4 (Mm4 mAChR)				506221	2.29674e+07	45.3704
Q4PJX1	ODR4	Odr4	Protein odr-4 homolog (mODR-4)				506221	2.28873e+07	45.2121
Q61702	ITIH1	Itih1	Inter-alpha-trypsin inhibitor heavy chain H1 (ITI heavy chain H1) (ITI-HC1) (Inter-alpha-inhibitor heavy chain 1)	678411	2.33478e+07	34.4155	506221	2.28706e+07	45.1791
Q9D2C2	SAAL1	Saal1	Protein SAAL1 (Synoviocyte proliferation-associated in collagen-induced arthritis protein 1) (SPACIA1)	2.77906e+06	678411	0.244115	506221	2.26626e+07	44.7683
Q9R0S3	MMP17	Mmp17	Matrix metalloproteinase-17 (MMP-17) (EC 3.4.24.-) (Membrane-type matrix metalloproteinase 4) (MT-MMP 4) (MTMMP4) (Membrane-type-4 matrix metalloproteinase) (MT4-MMP) (MT4MMP)	6.96959e+06	678411	0.0973386	506221	2.21168e+07	43.6901
Q61733	RT31	Mrps31	28S ribosomal protein S31, mitochondrial (MRP-S31) (S31mt) (Imogen 38)	678411	1.23609e+07	18.2204	506221	2.20842e+07	43.6256
A2AMZ4	NDUF8	Ndufaf8	NADH dehydrogenase [ubiquinone] 1 alpha subcomplex assembly factor 8				506221	2.19763e+07	43.4125
A3KGS3	RGPA2	Ralgapa2	Ral GTPase-activating protein subunit alpha-2 (250 kDa substrate of Akt) (AS250) (P220)				506221	2.19298e+07	43.3206
Q9CZW6	RN146	Rnf146	E3 ubiquitin-protein ligase RNF146 (EC 2.3.2.27) (Iduna) (RING finger protein 146) (RING-type E3 ubiquitin transferase RNF146)				506221	2.16487e+07	42.7654
Q07646	MEST	Mest	Mesoderm-specific transcript protein (EC 3.-.-.-) (Paternally-expressed gene 1 protein)	8.00382e+06	678411	0.0847609	506221	2.1611e+07	42.6908
P18581	CTR2	Slc7a2	Cationic amino acid transporter 2 (CAT-2) (CAT2) (20.5) (Low affinity cationic amino acid transporter 2) (Solute carrier family 7 member 2) (T-cell early activation protein) (TEA)	1.49381e+07	678411	0.0454147	506221	2.14595e+07	42.3917
Q91VU7	PUS7	Pus7	Pseudouridylate synthase 7 homolog (EC 5.4.99.-)				506221	2.12093e+07	41.8974
P70303	PYRG2	Ctps2	CTP synthase 2 (EC 6.3.4.2) (CTP synthetase 2) (CTPsH) (UTP--ammonia ligase 2)	2.79838e+07	1.44894e+07	0.517777	506221	2.09055e+07	41.2972
Q3UQ44	IQGA2	Iqgap2	Ras GTPase-activating-like protein IQGAP2	1.60161e+08	1.42939e+08	0.892474	9.46008e+07	3.90306e+09	41.2582
P97295	NPY2R	Npy2r	Neuropeptide Y receptor type 2 (NPY2-R) (NPY-Y2 receptor) (Y2 receptor)	3.49969e+06	678411	0.193849	506221	2.01076e+07	39.721
Q91YN9	BAG2	Bag2	BAG family molecular chaperone regulator 2 (BAG-2) (Bcl-2-associated athanogene 2)	17000845	2.42798e+07	1.42815	506221	2.00554e+07	39.6179
Q3UY34	CSTOS	Custos	Protein CUSTOS	8.43826e+06	678411	0.080397	506221	1.98413e+07	39.195
Q9WTK3	GPAA1	Gpaa1	Glycosylphosphatidylinositol anchor attachment 1 protein (GPI anchor attachment protein 1) (GAA1 protein homolog) (mGAA1)				506221	1.95674e+07	38.6538
Q8R2U4	NTM1A	Ntmt1	N-terminal Xaa-Pro-Lys N-methyltransferase 1 (EC 2.1.1.244) (Alpha N-terminal protein methyltransferase 1A) (Methyltransferase-like protein 11A) (X-Pro-Lys N-terminal protein methyltransferase 1A) (NTM1A) [Cleaved into: N-terminal Xaa-Pro-Lys N-methyltransferase 1, N-terminally processed]	1.29276e+07	1.56972e+07	1.21424	506221	1.95456e+07	38.6108
Q8CFA2	GCST	Amt	Aminomethyltransferase, mitochondrial (EC 2.1.2.10) (Glycine cleavage system T protein) (GCVT)				506221	1.93978e+07	38.3189
P54754	EPHB3	Ephb3	Ephrin type-B receptor 3 (EC 2.7.10.1) (Developmental kinase 5) (mDK-5) (Tyrosine-protein kinase receptor SEK-4)	1.07235e+07	678411	0.0632639	506221	1.92493e+07	38.0256
O55017	CAC1B	Cacna1b	Voltage-dependent N-type calcium channel subunit alpha-1B (Brain calcium channel III) (BIII) (Calcium channel, L type, alpha-1 polypeptide isoform 5) (Voltage-gated calcium channel subunit alpha Cav2.2)	3.19189e+07	2.17611e+07	0.681764	506221	1.89317e+07	37.3982
Q9JI59	JAM2	Jam2	Junctional adhesion molecule B (JAM-B) (Junctional adhesion molecule 2) (JAM-2) (Vascular endothelial junction-associated molecule) (VE-JAM) (CD antigen CD322)	7.56578e+07	62599904	0.827408	506221	1.88413e+07	37.2196
Q9JKF7	RM39	Mrpl39	39S ribosomal protein L39, mitochondrial (L39mt) (MRP-L39)	1.32349e+08	2.7139e+07	0.205057	506221	1.87608e+07	37.0605
Q9ESX5	DKC1	Dkc1	H/ACA ribonucleoprotein complex subunit DKC1 (EC 5.4.99.-) (Dyskerin) (Nopp140-associated protein of 57 kDa) (Nucleolar protein NAP57) (Nucleolar protein family A member 4) (snoRNP protein DKC1)	4.89725e+07	4.90944e+07	1.00249	506221	1.86288e+07	36.7998
Q8CFE6	S38A2	Slc38a2	Sodium-coupled neutral amino acid transporter 2 (Amino acid transporter A2) (Solute carrier family 38 member 2) (System A amino acid transporter 2) (System A transporter 1) (System N amino acid transporter 2)				506221	1.84102e+07	36.368
P62737	ACTA	Acta2	Actin, aortic smooth muscle (Alpha-actin-2) [Cleaved into: Actin, aortic smooth muscle, intermediate form]				3.42938e+08	1.23449e+10	35.9973
Q8CEC5	KBRS1	Nkiras1	NF-kappa-B inhibitor-interacting Ras-like protein 1 (I-kappa-B-interacting Ras-like protein 1) (Kappa B-Ras protein 1) (KappaB-Ras1)	4.43624e+07	4.54732e+07	1.02504	506221	1.81327e+07	35.8198
Q7TQE6	MACOI	Maco1	Macoilin (Brain-specific adapter protein C61) (Macoilin-1) (Transmembrane protein 57)				506221	1.80364e+07	35.6295
Q3ULF4	SPG7	Spg7	Paraplegin (EC 3.4.24.-) (Spastic paraplegia 7 protein)	5.00569e+07	2.26173e+07	0.451832	506221	1.80056e+07	35.5688
Q80UP5	AN13A	Ankrd13a	Ankyrin repeat domain-containing protein 13A	1.7215e+07	6.36001e+06	0.369446	506221	1.75928e+07	34.7532
Q9CQY1	ATG12	Atg12	Ubiquitin-like protein ATG12 (Autophagy-related protein 12) (APG12-like)				506221	1.73664e+07	34.3059
Q6DFY8	BRNP2	Brinp2	BMP/retinoic acid-inducible neural-specific protein 2	1.13749e+07	1.27486e+07	1.12077	506221	1.73439e+07	34.2616
Q91VU6	DCA11	Dcaf11	DDB1- and CUL4-associated factor 11 (WD repeat-containing protein 23)				506221	1.72661e+07	34.1078
Q9JIN6	KCMB4	Kcnmb4	Calcium-activated potassium channel subunit beta-4 (BK channel subunit beta-4) (BKbeta4) (Calcium-activated potassium channel, subfamily M subunit beta-4) (Charybdotoxin receptor subunit beta-4) (K(VCA)beta-4) (Maxi K channel subunit beta-4) (Slo-beta-4)				506221	1.7133e+07	33.8449
O88792	JAM1	F11r	Junctional adhesion molecule A (JAM-A) (Junctional adhesion molecule 1) (JAM-1) (CD antigen CD321)				506221	1.70948e+07	33.7695
Q8C080	SNX16	Snx16	Sorting nexin-16	22255538	6.25352e+06	0.280987	506221	1.70003e+07	33.5828
Q3UA37	QRIC1	Qrich1	Transcriptional regulator QRICH1 (Glutamine-rich protein 1)	1.73384e+07	2.40896e+07	1.38938	506221	1.69804e+07	33.5435
Q8K2H3	FA13B	Fam13b	Protein FAM13B				506221	1.68167e+07	33.2202
Q91YN0	CL004	D6Wsu163e	Protein C12orf4 homolog	678411	2.88979e+07	42.5964	506221	1.67729e+07	33.1337
Q61146	OCLN	Ocln	Occludin				506221	1.67372e+07	33.0631
Q8BU11	TOX4	Tox4	TOX high mobility group box family member 4 (Epidermal Langerhans cell protein LCP1)	4.86949e+07	678411	0.0139319	506221	1.64091e+07	32.4148
Q99M31	HSP7E	Hspa14	Heat shock 70 kDa protein 14 (NST-1) (hsr.1)	5.68019e+06	678411	0.119435	506221	1.62971e+07	32.1937
Q80TG9	LRFN2	Lrfn2	Leucine-rich repeat and fibronectin type-III domain-containing protein 2	1.4071e+07	1.49881e+07	1.06518	506221	1.61686e+07	31.9398
Q5XPI3	RN123	Rnf123	E3 ubiquitin-protein ligase RNF123 (EC 2.3.2.27) (Kip1 ubiquitination-promoting complex protein 1) (RING finger protein 123) (RING-type E3 ubiquitin transferase RNF123)	1.77991e+07	1.46799e+07	0.824752	506221	1.61074e+07	31.8189
Q5FWK3	RHG01	Arhgap1	Rho GTPase-activating protein 1 (Rho-type GTPase-activating protein 1)	4.78486e+08	4.30532e+08	0.899779	1.20772e+07	3.83995e+08	31.7951
O35607	BMPR2	Bmpr2	Bone morphogenetic protein receptor type-2 (BMP type-2 receptor) (BMPR-2) (EC 2.7.11.30) (BRK-3) (Bone morphogenetic protein receptor type II) (BMP type II receptor) (BMPR-II)	1.53593e+07	1.32327e+07	0.86154	506221	1.60198e+07	31.6458
Q9DBN4	P33MX	P33monox	Putative monooxygenase p33MONOX (EC 1.-.-.-)	9.53644e+06	2.45064e+07	2.56976	506221	1.56637e+07	30.9424
P59114	CAPAM	Pcif1	mRNA (2'-O-methyladenosine-N(6)-)-methyltransferase (EC 2.1.1.62) (Cap-specific adenosine methyltransferase) (CAPAM) (Phosphorylated CTD-interacting factor 1)	1.07743e+07	678411	0.0629658	506221	1.56245e+07	30.865
Q3U0P5	ENTP6	Entpd6	Ectonucleoside triphosphate diphosphohydrolase 6 (NTPDase 6) (EC 3.6.1.6) (CD39 antigen-like 2)				506221	1.56005e+07	30.8176
Q99PM3	TF2AA	Gtf2a1	Transcription initiation factor IIA subunit 1 (General transcription factor IIA subunit 1) [Cleaved into: Transcription initiation factor IIA alpha chain (TFIIA p35 subunit); Transcription initiation factor IIA beta chain (TFIIA p19 subunit)]				506221	1.5581e+07	30.7791
Q8C5Q4	GRSF1	Grsf1	G-rich sequence factor 1 (GRSF-1)	7.58523e+06	7.33028e+06	0.966388	506221	1.54984e+07	30.6159
Q4VBE8	WDR18	Wdr18	WD repeat-containing protein 18	10587926	1.0925e+07	1.03184	506221	1.5245e+07	30.1152
O88939	ZBT7A	Zbtb7a	Zinc finger and BTB domain-containing protein 7A (Leukemia/lymphoma-related factor) (POZ and Krueppel erythroid myeloid ontogenic factor) (POK erythroid myeloid ontogenic factor) (Pokemon)				506221	15180019	29.987
Q8C5W3	TBCEL	Tbcel	Tubulin-specific chaperone cofactor E-like protein (Leucine-rich repeat-containing protein 35)	3.58525e+07	3.79717e+07	1.05911	506221	1.5137e+07	29.902
Q9Z148	EHMT2	Ehmt2	Histone-lysine N-methyltransferase EHMT2 (EC 2.1.1.-) (Euchromatic histone-lysine N-methyltransferase 2) (HLA-B-associated transcript 8) (Histone H3-K9 methyltransferase 3) (H3-K9-HMTase 3) (Protein G9a)				506221	1.50231e+07	29.677
Q99JR8	SMRD2	Smarcd2	SWI/SNF-related matrix-associated actin-dependent regulator of chromatin subfamily D member 2 (60 kDa BRG-1/Brm-associated factor subunit B) (BRG1-associated factor 60B) (BAF60B)				506221	1.45601e+07	28.7623
Q9R099	TBL2	Tbl2	Transducin beta-like protein 2	21737502	3.07201e+07	1.41323	506221	1.44242e+07	28.4939
P22682	CBL	Cbl	E3 ubiquitin-protein ligase CBL (EC 2.3.2.27) (Casitas B-lineage lymphoma proto-oncogene) (Proto-oncogene c-Cbl) (RING-type E3 ubiquitin transferase CBL) (Signal transduction protein CBL)	2.92943e+07	678411	0.0231585	506221	1.43277e+07	28.3033
Q8HW98	IGLO5	Iglon5	IgLON family member 5	5.62751e+06	41725075	7.41448	506221	1.41548e+07	27.9618
Q8BKT7	THOC5	Thoc5	THO complex subunit 5 homolog (Fms-interacting protein) (FMIP)	4.44187e+06	678411	0.152731	506221	1.39786e+07	27.6136
Q8BXJ9	TMM62	Tmem62	Transmembrane protein 62	1.00351e+07	1.72719e+07	1.72116	506221	1.39582e+07	27.5734
Q91ZD4	VANG2	Vangl2	Vang-like protein 2 (Loop-tail protein 1) (Loop-tail-associated protein) (Van Gogh-like protein 2)				506221	1.39223e+07	27.5025
Q80VJ3	DNPH1	Dnph1	2'-deoxynucleoside 5'-phosphate N-hydrolase 1 (EC 3.2.2.-) (c-Myc-responsive protein Rcl)	1.93423e+07	2.43204e+07	1.25737	506221	1.37363e+07	27.1351
Q9R1Z8	VINEX	Sorbs3	Vinexin (SH3 domain-containing protein SH3P3) (SH3-containing adapter molecule 1) (SCAM-1) (Sorbin and SH3 domain-containing protein 3)	2.20223e+07	1.93291e+07	0.877708	506221	1.37189e+07	27.1007
P69744	TRPV5	Trpv5	Transient receptor potential cation channel subfamily V member 5 (TrpV5) (Calcium transport protein 2) (CaT2) (Epithelial calcium channel 1) (ECaC1) (Osm-9-like TRP channel 3) (OTRPC3)				506221	1.36006e+07	26.8669
Q9D9M2	UBP12	Usp12	Ubiquitin carboxyl-terminal hydrolase 12 (EC 3.4.19.12) (Deubiquitinating enzyme 12) (Ubiquitin thioesterase 12) (Ubiquitin-hydrolyzing enzyme 1) (Ubiquitin-specific-processing protease 12)				506221	1.35744e+07	26.8151
Q80YA8	CRUM2	Crb2	Protein crumbs homolog 2 (crumbs2) (Crumbs-like protein 2)				506221	1.34754e+07	26.6197
P20934	EVI2A	Evi2a	Protein EVI2A (Ecotropic viral integration site 2A protein) (EVI-2A)	6.67402e+06	1.42884e+07	2.1409	506221	1.33828e+07	26.4367
Q0VBU9	PLPP4	Plpp4	Phospholipid phosphatase 4 (EC 3.1.3.4) (EC 3.1.3.81)				506221	1.33091e+07	26.2911
Q9CY62	RN181	Rnf181	E3 ubiquitin-protein ligase RNF181 (EC 2.3.2.27) (RING finger protein 181) (RING-type E3 ubiquitin transferase RNF181)				506221	1.3281e+07	26.2355
Q9DBS5	KLC4	Klc4	Kinesin light chain 4 (KLC 4) (Kinesin-like protein 8)	8.64096e+06	678411	0.078511	506221	1.32555e+07	26.1851
Q9D939	ST1C2	Sult1c2	Sulfotransferase 1C2 (ST1C2) (EC 2.8.2.1)				506221	1.31664e+07	26.0092
Q3UHH1	ZSWM8	Zswim8	Zinc finger SWIM domain-containing protein 8	928719	678411	0.73048	506221	1.30771e+07	25.8328
P70268	PKN1	Pkn1	Serine/threonine-protein kinase N1 (EC 2.7.11.13) (Protein kinase C-like 1) (Protein kinase C-like PKN) (Protein-kinase C-related kinase 1) (Serine-threonine protein kinase N)	1.51306e+07	1.51576e+07	1.00178	506221	1.30734e+07	25.8256
O70494	SP3	Sp3	Transcription factor Sp3	3.39857e+06	678411	0.199617	506221	1.27535e+07	25.1936
Q8K448	ABCA5	Abca5	Cholesterol transporter ABCA5 (EC 7.6.2.-) (ATP-binding cassette sub-family A member 5)	1.22382e+07	678411	0.0554338	506221	1.26874e+07	25.0629
Q923B0	GGACT	Ggact	Gamma-glutamylaminecyclotransferase (GGACT) (EC 4.3.2.8) (AIG2-like domain-containing protein 1) (Gamma-glutamylamine cyclotransferase)	2.22643e+07	38435297	1.72632	506221	1.2616e+07	24.922
O70551	SRPK1	Srpk1	SRSF protein kinase 1 (EC 2.7.11.1) (SFRS protein kinase 1) (Serine/arginine-rich protein-specific kinase 1) (SR-protein-specific kinase 1)	1.11584e+07	1.11891e+07	1.00275	506221	1.24992e+07	24.6912
Q9D9M5	PHOP2	Phospho2	Pyridoxal phosphate phosphatase PHOSPHO2 (EC 3.1.3.74)	678411	2.95072e+07	43.4946	506221	1.24057e+07	24.5066
Q8CA95	PDE10	Pde10a	cAMP and cAMP-inhibited cGMP 3',5'-cyclic phosphodiesterase 10A (EC 3.1.4.17)	9.37843e+06	1.02781e+07	1.09593	506221	1.23967e+07	24.4886
Q6PGC1	DHX29	Dhx29	ATP-dependent RNA helicase DHX29 (EC 3.6.4.13) (DEAH box protein 29)	1.70352e+07	1.28771e+07	0.75591	506221	1.2385e+07	24.4656
Q9ERA6	TFP11	Tfip11	Tuftelin-interacting protein 11 (Septin and tuftelin-interacting protein 1) (STIP-1) (Tuftelin-interacting protein 39)	678411	1.06172e+07	15.6501	506221	1.23698e+07	24.4356
Q8K1E0	STX5	Stx5	Syntaxin-5				506221	1.22913e+07	24.2805
Q9DCN1	NUD12	Nudt12	NAD-capped RNA hydrolase NUDT12 (DeNADding enzyme NUDT12) (EC 3.6.1.-) (NADH pyrophosphatase NUDT12) (EC 3.6.1.22) (Nucleoside diphosphate-linked moiety X motif 12) (Nudix motif 12)	1.57228e+07	678411	0.0431483	506221	1.21953e+07	24.0908
Q3UBG2	PCLI1	Pid1	PTB-containing, cubilin and LRP1-interacting protein (P-CLI1) (Phosphotyrosine interaction domain-containing protein 1)	6.00577e+06	678411	0.11296	506221	1.2085e+07	23.873
Q149C2	MIPT3	Traf3ip1	TRAF3-interacting protein 1 (Intraflagellar transport protein 54 homolog) (Microtubule-interacting protein associated with TRAF3) (MIP-T3)				506221	1.20619e+07	23.8274
Q99MQ5	COPA1	Col25a1	Collagen alpha-1(XXV) chain (CLAC-P) [Cleaved into: Collagen-like Alzheimer amyloid plaque component (CLAC)]				506221	1.20408e+07	23.7857
B2RUR8	OTU7B	Otud7b	OTU domain-containing protein 7B (EC 3.4.19.12) (Cellular zinc finger anti-NF-kappa-B protein) (Zinc finger A20 domain-containing protein 1) (Zinc finger protein Cezanne)	9.44661e+06	6.64574e+06	0.703505	506221	1.20206e+07	23.7457
P49138	MAPK2	Mapkapk2	MAP kinase-activated protein kinase 2 (MAPK-activated protein kinase 2) (MAPKAP kinase 2) (MAPKAP-K2) (MAPKAPK-2) (MK-2) (MK2) (EC 2.7.11.1)				506221	1.19703e+07	23.6464
Q62314	TGON2	Tgoln2	Trans-Golgi network integral membrane protein 2 (TGN38B)	2.00357e+07	678411	0.0338602	506221	1.19399e+07	23.5864
O35668	HAP1	Hap1	Huntingtin-associated protein 1 (HAP-1)	678411	1.14221e+07	16.8366	506221	11875630	23.4594
E9Q5M6	CFA44	Cfap44	Cilia- and flagella-associated protein 44				506221	11859981	23.4285
E9Q236	MRP4	Abcc4	ATP-binding cassette sub-family C member 4 (EC 7.6.2.-) (EC 7.6.2.2) (EC 7.6.2.3) (Multidrug resistance-associated protein 4)	5.75426e+06	678411	0.117897	506221	1.16961e+07	23.1048
Q8QZY6	TSN14	Tspan14	Tetraspanin-14 (Tspan-14) (Transmembrane 4 superfamily member 14)	9.48126e+06	8.76015e+06	0.923944	506221	1.16548e+07	23.0232
Q8VDI7	UBAC1	Ubac1	Ubiquitin-associated domain-containing protein 1 (UBA domain-containing protein 1) (E3 ubiquitin-protein ligase subunit KPC2) (Kip1 ubiquitination-promoting complex protein 2)	1.74812e+07	3.02109e+07	1.7282	506221	1.1623e+07	22.9603
Q9D309	FAM3B	Fam3b	Protein FAM3B (Cytokine-like protein 2-21) (Pancreatic-derived factor) (PANDER)	1.13808e+07	678411	0.05961	506221	1.15961e+07	22.9072
A2RSX7	TYW5	Tyw5	tRNA wybutosine-synthesizing protein 5 (EC 1.14.11.42) (tRNA(Phe) (7-(3-amino-3-carboxypropyl)wyosine(37)-C(2))-hydroxylase)				506221	1.12993e+07	22.3208
Q00519	XDH	Xdh	Xanthine dehydrogenase/oxidase [Includes: Xanthine dehydrogenase (XD) (EC 1.17.1.4); Xanthine oxidase (XO) (EC 1.17.3.2) (Xanthine oxidoreductase) (XOR)]	3.23698e+06	678411	0.209582	506221	1.12848e+07	22.2924
Q6NSQ9	G6PC3	G6pc3	Glucose-6-phosphatase 3 (G-6-Pase 3) (G6Pase 3) (EC 3.1.3.9) (Ubiquitous glucose-6-phosphatase catalytic subunit-related protein)	6.92335e+07	678411	0.00979888	506221	1.12805e+07	22.2838
Q8R3B7	BRD8	Brd8	Bromodomain-containing protein 8				506221	1.11702e+07	22.0659
Q8CIP5	DISP2	Disp2	Protein dispatched homolog 2				506221	1.1108e+07	21.9431
Q8BR70	YIPF6	Yipf6	Protein YIPF6 (YIP1 family member 6)	2.9565e+07	678411	0.0229464	506221	1.09542e+07	21.6391
P41233	ABCA1	Abca1	Phospholipid-transporting ATPase ABCA1 (EC 7.6.2.1) (ATP-binding cassette sub-family A member 1) (ATP-binding cassette transporter 1) (ABC-1) (ATP-binding cassette 1)	8.04066e+06	1.37638e+07	1.71178	506221	1.09374e+07	21.6059
Q6P6J9	TXD15	Txndc15	Thioredoxin domain-containing protein 15	1.33161e+07	1.03436e+07	0.776773	506221	1.06809e+07	21.0992
O88796	RPP30	Rpp30	Ribonuclease P protein subunit p30 (RNaseP protein p30) (EC 3.1.26.5) (RNase P subunit 2)				506221	1.06495e+07	21.0373
A2ALK8	PTN3	Ptpn3	Tyrosine-protein phosphatase non-receptor type 3 (EC 3.1.3.48)	4.41699e+06	3.53632e+06	0.800618	506221	1.05839e+07	20.9077
Q80W22	THNS2	Thnsl2	Threonine synthase-like 2 (TSH2) (mTSH2) (EC 4.2.3.-)	5.33834e+07	6.17319e+07	1.15639	2.19385e+06	4.57042e+07	20.8329
P97819	PLPL9	Pla2g6	85/88 kDa calcium-independent phospholipase A2 (CaI-PLA2) (EC 3.1.1.4) (2-lysophosphatidylcholine acylhydrolase) (EC 3.1.1.5) (Group VI phospholipase A2) (GVI PLA2) (Intracellular membrane-associated calcium-independent phospholipase A2 beta) (iPLA2-beta) (Palmitoyl-CoA hydrolase) (EC 3.1.2.2) (Patatin-like phospholipase domain-containing protein 9) (PNPLA9)				506221	1.05354e+07	20.8119
Q1HFZ0	NSUN2	Nsun2	RNA cytosine C(5)-methyltransferase NSUN2 (EC 2.1.1.-) (Myc-induced SUN domain-containing protein) (Misu) (NOL1/NOP2/Sun domain family member 2) (mRNA cytosine C(5)-methyltransferase) (EC 2.1.1.-) (tRNA cytosine C(5)-methyltransferase) (EC 2.1.1.-) (EC 2.1.1.203)	1.96936e+07	1.39154e+07	0.706592	506221	1.05182e+07	20.7778
Q8R2R3	AAGAB	Aagab	Alpha- and gamma-adaptin-binding protein p34	1.75175e+07	1.59488e+07	0.910454	506221	1.03936e+07	20.5318
O70496	CLCN7	Clcn7	H(+)/Cl(-) exchange transporter 7 (Chloride channel 7 alpha subunit) (Chloride channel protein 7) (ClC-7)				506221	10329655	20.4054
Q9DAW6	PRP4	Prpf4	U4/U6 small nuclear ribonucleoprotein Prp4 (U4/U6 snRNP 60 kDa protein) (WD splicing factor Prp4)				506221	1.03233e+07	20.3929
O35638	STAG2	Stag2	Cohesin subunit SA-2 (SCC3 homolog 2) (Stromal antigen 2)				506221	1.02668e+07	20.2813
Q8BM72	HSP13	Hspa13	Heat shock 70 kDa protein 13 (Microsomal stress-70 protein ATPase core) (Stress-70 protein chaperone microsome-associated 60 kDa protein)	678411	1.00129e+07	14.7593	506221	1.02555e+07	20.259
Q8R3Q0	SARAF	Saraf	Store-operated calcium entry-associated regulatory factor (SARAF) (SOCE-associated regulatory factor) (Transmembrane protein 66)	1.56513e+07	1.63378e+07	1.04387	506221	1.02487e+07	20.2455
Q9R0M4	PODXL	Podxl	Podocalyxin (Podocalyxin-like protein 1) (PC) (PCLP-1)				506221	1.01751e+07	20.1002
Q5SWP3	NACAD	Nacad	NAC-alpha domain-containing protein 1	7.68568e+06	678411	0.0882695	506221	1.01299e+07	20.0109
Q9WTS4	TEN1	Tenm1	Teneurin-1 (Ten-1) (Protein Odd Oz/ten-m homolog 1) (Tenascin-M1) (Ten-m1) (Teneurin transmembrane protein 1) [Cleaved into: Ten-1 intracellular domain (IDten-1) (Ten-1 ICD); Teneurin C-terminal-associated peptide (TCPA-1) (Ten-1 extracellular domain) (Ten-1 ECD)]	5.71091e+06	678411	0.118792	506221	1.00838e+07	19.9198
Q9ERR7	2022-09-15	Selenof	Selenoprotein F (15 kDa selenoprotein)	678411	6952123	10.2477	506221	1.0028e+07	19.8095
Q9CX60	LBH	Lbh	Protein LBH (Limb bud and heart-expressed protein)				506221	9973941	19.7028
Q3UUF8	AN34B	Ankrd34b	Ankyrin repeat domain-containing protein 34B (Dendritic cell progenitor protein of 58 kDa)				506221	9.97099e+06	19.6969
P70261	PALD	Pald1	Paladin	9.24056e+07	678411	0.00734166	506221	9.8828e+06	19.5227
Q3V384	AFG1L	Afg1l	AFG1-like ATPase (EC 3.6.-.-) (Lactation elevated protein 1)	1.74426e+07	2.76023e+07	1.58247	506221	9.86457e+06	19.4867
Q14DH7	ACSS3	Acss3	Acyl-CoA synthetase short-chain family member 3, mitochondrial (EC 6.2.1.1) (Acetate--CoA ligase 3) (Propionate--CoA ligase) (EC 6.2.1.17)				506221	9.85995e+06	19.4776
Q6NZN0	RBM26	Rbm26	RNA-binding protein 26 (Protein expressed in male leptotene and zygotene spermatocytes 393) (MLZ-393) (RNA-binding motif protein 26)	1.38584e+07	6.81992e+06	0.492114	529973	1.01584e+07	19.1678
A2AIL4	NDUF6	Ndufaf6	NADH dehydrogenase (ubiquinone) complex I, assembly factor 6	9.79245e+06	1.38641e+07	1.41579	506221	9.68303e+06	19.1281
Q9D820	PRXD1	Prorsd1	Prolyl-tRNA synthetase associated domain-containing protein 1 (PrdX deacylase domain-containing protein 1)				1.15719e+07	2.21278e+08	19.122
P43300	EGR3	Egr3	Early growth response protein 3 (EGR-3)	1.16422e+07	1.00664e+07	0.864648	506221	9.67622e+06	19.1146
Q80TR4	SLIT1	Slit1	Slit homolog 1 protein (Slit-1)	2.51759e+07	1.29781e+07	0.515496	506221	9.65909e+06	19.0808
Q9ERE9	JIP2	Mapk8ip2	C-Jun-amino-terminal kinase-interacting protein 2 (JIP-2) (JNK-interacting protein 2) (Islet-brain-2) (IB-2) (JNK MAP kinase scaffold protein 2) (Mitogen-activated protein kinase 8-interacting protein 2)	5.43059e+07	678411	0.0124924	506221	9.45527e+06	18.6782
Q9WUZ9	ENTP5	Entpd5	Ectonucleoside triphosphate diphosphohydrolase 5 (NTPDase 5) (EC 3.6.1.6) (CD39 antigen-like 4) (ER-UDPase) (Guanosine-diphosphatase ENTPD5) (GDPase ENTPD5) (EC 3.6.1.42) (Nucleoside diphosphatase) (Uridine-diphosphatase ENTPD5) (UDPase ENTPD5)	7962633	7.86757e+06	0.988062	506221	9.4402e+06	18.6484
Q9CWG9	BL1S2	Bloc1s2	Biogenesis of lysosome-related organelles complex 1 subunit 2 (BLOC-1 subunit 2)	678411	1.16246e+07	17.135	506221	9.29586e+06	18.3633
Q6PGH0	UBTD2	Ubtd2	Ubiquitin domain-containing protein 2	7.06978e+06	1.1927e+07	1.68704	506221	9.22501e+06	18.2233
P62340	TBPL1	Tbpl1	TATA box-binding protein-like 1 (TBP-like 1) (21 kDa TBP-like protein) (TATA box-binding protein-related factor 2) (TBP-related factor 2) (TBP-like factor) (TBP-related protein)	4.59181e+06	678411	0.147744	506221	9.16346e+06	18.1017
Q8K0D7	GET1	Get1	Guided entry of tail-anchored proteins factor 1 (Tail-anchored protein insertion receptor WRB) (Tryptophan-rich basic protein)	1.42368e+07	678411	0.0476519	506221	9.11492e+06	18.0058
Q924Z6	XPO6	Xpo6	Exportin-6 (Exp6) (Ran-binding protein 20)	1.88714e+07	2.01036e+07	1.06529	506221	9.07967e+06	17.9362
Q8R2Y3	DOLK	Dolk	Dolichol kinase (EC 2.7.1.108) (Transmembrane protein 15)				506221	9.0413e+06	17.8604
Q9QZC7	PKHB2	Plekhb2	Pleckstrin homology domain-containing family B member 2 (PH domain-containing family B member 2) (Evectin-2)				506221	9.01739e+06	17.8132
P01029	CO4B	C4b	Complement C4-B [Cleaved into: Complement C4 beta chain; Complement C4 alpha chain; C4a anaphylatoxin; Complement C4 gamma chain]	678411	3.08638e+07	45.4942	506221	8.96251e+06	17.7048
Q6IFX2	K1C42	Krt42	Keratin, type I cytoskeletal 42 (Cytokeratin-42) (CK-42) (Keratin-17n) (Keratin-42) (K42) (Type I keratin Ka22)				506221	8.92502e+06	17.6307
Q8R344	CCD12	Ccdc12	Coiled-coil domain-containing protein 12	678411	9.31175e+06	13.7258	506221	8.89187e+06	17.5652
P58501	PAXB1	Paxbp1	PAX3- and PAX7-binding protein 1 (PAX3/7BP) (GC-rich sequence DNA-binding factor 1)				506221	8.85666e+06	17.4957
Q8BS95	GPHR	Gpr89	Golgi pH regulator (Protein GPR89)				7.70464e+06	1.34599e+08	17.4699
Q6Q783	KMT5C	Kmt5c	Histone-lysine N-methyltransferase KMT5C (Lysine-specific methyltransferase 5C) (Suppressor of variegation 4-20 homolog 2) (Su(var)4-20 homolog 2) (Suv4-20h2) ([histone H4]-N-methyl-L-lysine20 N-methyltransferase KMT5B) (EC 2.1.1.362) ([histone H4]-lysine20 N-methyltransferase KMT5B) (EC 2.1.1.361)				506221	8.79386e+06	17.3716
Q9D1R2	KTI12	Kti12	Protein KTI12 homolog				506221	8.78811e+06	17.3602
Q8BZX4	SREK1	Srek1	Splicing regulatory glutamine/lysine-rich protein 1 (Serine/arginine-rich-splicing regulatory protein 86) (SRrp86) (Splicing factor, arginine/serine-rich 12)	1.54038e+07	1.11825e+07	0.725958	506221	8745608	17.2763
Q5NCQ5	DPH1	Dph1	2-(3-amino-3-carboxypropyl)histidine synthase subunit 1 (EC 2.5.1.108) (Diphthamide biosynthesis protein 1) (Diphtheria toxin resistance protein 1) (Ovarian cancer-associated gene 1 protein homolog) (S-adenosyl-L-methionine:L-histidine 3-amino-3-carboxypropyltransferase 1)	1.03436e+07	1.29827e+07	1.25515	506221	8.7135e+06	17.2129
Q99LL5	PWP1	Pwp1	Periodic tryptophan protein 1 homolog				506221	8.67022e+06	17.1274
P57080	UBP25	Usp25	Ubiquitin carboxyl-terminal hydrolase 25 (EC 3.4.19.12) (Deubiquitinating enzyme 25) (Ubiquitin thioesterase 25) (Ubiquitin-specific-processing protease 25) (mUSP25)	2.53501e+07	678411	0.0267617	506221	8.65952e+06	17.1062
Q3UN16	GP162	Gpr162	Probable G-protein coupled receptor 162				914940	1.56131e+07	17.0647
Q8R2Y9	SOSB1	Nabp2	SOSS complex subunit B1 (Nucleic acid-binding protein 2) (Oligonucleotide/oligosaccharide-binding fold-containing protein 2B) (Sensor of single-strand DNA complex subunit B1) (Sensor of ssDNA subunit B1) (SOSS-B1) (Single-stranded DNA-binding protein 1)	678411	5119134	7.54577	506221	8.61411e+06	17.0165
Q640M6	GDPD5	Gdpd5	Glycerophosphodiester phosphodiesterase domain-containing protein 5 (Glycerophosphocholine phosphodiesterase GDPD5) (EC 3.1.4.2) (Glycerophosphodiester phosphodiesterase 2) (Phosphoinositide phospholipase C GDPD5) (EC 3.1.4.11)				506221	8.51166e+06	16.8141
Q7TQ33	RGMB	Rgmb	Repulsive guidance molecule B (DRG11-responsive axonal guidance and outgrowth of neurite) (DRAGON)				506221	8.43706e+06	16.6668
Q8BR86	KIRR3	Kirrel3	Kin of IRRE-like protein 3 (Kin of irregular chiasm-like protein 3) (Nephrin-like protein 2) (mKirre) [Cleaved into: Processed kin of IRRE-like protein 3]				506221	8.38915e+06	16.5721
Q9Z0Z4	HEPH	Heph	Hephaestin (EC 1.-.-.-)				506221	8.35241e+06	16.4995
Q8R422	CD109	Cd109	CD109 antigen (GPI-anchored alpha-2 macroglobulin-related protein) (CD antigen CD109)	8.73886e+06	9.50877e+06	1.0881	506221	8.30615e+06	16.4082
O88843	CRADD	Cradd	Death domain-containing protein CRADD (Caspase and RIP adapter with death domain) (RIP-associated protein with a death domain)	1.04294e+07	9.43961e+06	0.905098	506221	8.27137e+06	16.3395
Q80TH2	ERBIN	Erbin	Erbin (Densin-180-like protein) (Erbb2-interacting protein) (Protein LAP2)	4.63013e+07	4.04575e+07	0.873787	506221	8.25997e+06	16.3169
Q99MP8	BRAP	Brap	BRCA1-associated protein (EC 2.3.2.27) (BRAP2) (Impedes mitogenic signal propagation) (IMP) (RING-type E3 ubiquitin transferase BRAP2)	1.9592e+08	678411	0.00346269	506221	8.2189e+06	16.2358
Q9Z1T6	FYV1	Pikfyve	1-phosphatidylinositol 3-phosphate 5-kinase (Phosphatidylinositol 3-phosphate 5-kinase) (EC 2.7.1.150) (FYVE finger-containing phosphoinositide kinase) (PIKfyve) (Phosphatidylinositol 3-phosphate 5-kinase type III) (PIPkin-III) (Type III PIP kinase) (Serine-protein kinase PIKFYVE) (EC 2.7.11.1) (p235)	9.54849e+06	9.94684e+06	1.04172	506221	8.16478e+06	16.1289
Q99L85	ELP5	Elp5	Elongator complex protein 5 (Dermal papilla-derived protein 6 homolog) (Retinoic acid-induced protein 12)	1.69631e+07	1.70073e+07	1.00261	506221	8.1508e+06	16.1013
Q9JMB0	GKAP1	Gkap1	G kinase-anchoring protein 1 (cGMP-dependent protein kinase-anchoring protein of 42 kDa)	1.79865e+08	678411	0.00377179	4.20361e+06	6.71669e+07	15.9784
Q9CX97	WDR55	Wdr55	WD repeat-containing protein 55				506221	8.03393e+06	15.8704
P55144	TYRO3	Tyro3	Tyrosine-protein kinase receptor TYRO3 (EC 2.7.10.1) (Etk2/tyro3) (TK19-2) (Tyrosine-protein kinase DTK) (Tyrosine-protein kinase RSE) (Tyrosine-protein kinase TIF)	7.5412e+06	678411	0.0899606	506221	8.01001e+06	15.8232
Q9JJR9	NRIP3	Nrip3	Nuclear receptor-interacting protein 3				506221	7.96359e+06	15.7315
Q6A152	CP4X1	Cyp4x1	Cytochrome P450 4X1 (EC 1.14.14.-) (CYPIVX1)				506221	7.92241e+06	15.6501
Q8VHQ3	PP16B	Ppp1r16b	Protein phosphatase 1 regulatory inhibitor subunit 16B (CAAX box protein TIMAP) (TGF-beta-inhibited membrane-associated protein)				506221	7.91584e+06	15.6371
Q8JZU0	NUD13	Nudt13	NAD(P)H pyrophosphatase NUDT13, mitochondrial (EC 3.6.1.22) (Nucleoside diphosphate-linked moiety X motif 13) (Nudix motif 13)	678411	7.22028e+06	10.6429	506221	7.89808e+06	15.602
Q7TSK2	SEZ6	Sez6	Seizure protein 6 (SEZ-6) (Brain-specific receptor-like protein C) (BSRP-C)				506221	7.87282e+06	15.5521
Q3V0J1	TM237	Tmem237	Transmembrane protein 237 (Amyotrophic lateral sclerosis 2 chromosomal region candidate gene 4 protein homolog)				506221	7.85526e+06	15.5175
Q0V8T9	CTP5A	Cntnap5a	Contactin-associated protein like 5-1 (Cell recognition molecule Caspr5-1) (Cell recognition molecule Caspr5a) (Contactin-associated protein-like 5a)	3.66186e+06	678411	0.185264	506221	7.81058e+06	15.4292
E9Q9D5	RBL2A	Rabl2	Rab-like protein 2A	9.89995e+06	678411	0.0685267	506221	7.78743e+06	15.3835
Q9D1E8	PLCE	Agpat5	1-acyl-sn-glycerol-3-phosphate acyltransferase epsilon (EC 2.3.1.51) (1-acylglycerol-3-phosphate O-acyltransferase 5) (1-AGP acyltransferase 5) (1-AGPAT 5) (Lysophosphatidic acid acyltransferase epsilon) (LPAAT-epsilon)				506221	7.7556e+06	15.3206
P62080	TSN5	Tspan5	Tetraspanin-5 (Tspan-5) (Tetraspan NET-4) (Transmembrane 4 superfamily member 9)	678411	1.68534e+07	24.8425	506221	7.54536e+06	14.9053
Q96DY5	RN112	Rnf112	RING finger protein 112 (EC 2.3.2.27) (Brain finger protein) (Neurolastin) (Zinc finger protein 179)				506221	7.5129e+06	14.8412
Q80TA6	MTMRC	Mtmr12	Myotubularin-related protein 12 (Inactive phosphatidylinositol 3-phosphatase 12)	2.31769e+07	2.49752e+07	1.07759	506221	7.49628e+06	14.8083
O88533	DDC	Ddc	Aromatic-L-amino-acid decarboxylase (AADC) (EC 4.1.1.28) (DOPA decarboxylase) (DDC)	2.87668e+07	4.09738e+07	1.42435	2.29696e+06	3.38007e+07	14.7154
Q9CVD2	ATX3	Atxn3	Ataxin-3 (EC 3.4.19.12) (Machado-Joseph disease protein 1 homolog)	8.88822e+06	678411	0.076327	506221	7432186	14.6817
Q3UVG3	F91A1	Fam91a1	Protein FAM91A1	678411	3.7542e+07	55.3381	2.57002e+06	3.76309e+07	14.6423
Q6P8M1	TATD1	Tatdn1	Putative deoxyribonuclease TATDN1 (EC 3.1.21.-)	678411	6.67402e+06	9.83772	506221	7.40918e+06	14.6363
Q9DCF9	SSRG	Ssr3	Translocon-associated protein subunit gamma (TRAP-gamma) (Signal sequence receptor subunit gamma) (SSR-gamma)	1.14162e+07	678411	0.0594252	506221	7.39258e+06	14.6035
Q8BWW4	LARP4	Larp4	La-related protein 4 (La ribonucleoprotein domain family member 4)	1.20625e+07	678411	0.0562412	506221	7.35396e+06	14.5272
Q8BP27	SFR1	Sfr1	Swi5-dependent recombination DNA repair protein 1 homolog (Meiosis protein 5 homolog)	1.40951e+07	4.97931e+07	3.53264	506221	7.31417e+06	14.4486
Q641K5	NUAK1	Nuak1	NUAK family SNF1-like kinase 1 (EC 2.7.11.1) (AMPK-related protein kinase 5) (Omphalocele kinase 1)	1.4017e+07	678411	0.0483992	506221	7.28862e+06	14.3981
Q9EST3	4ET	Eif4enif1	Eukaryotic translation initiation factor 4E transporter (4E-T) (eIF4E transporter) (CD40 ligand-activated specific transcript 4) (Eukaryotic translation initiation factor 4E nuclear import factor 1)				1.01779e+06	1.44711e+07	14.2182
Q8BNE1	TCAF1	Tcaf1	TRPM8 channel-associated factor 1 (TRP channel-associated factor 1)	6.87313e+06	6.74002e+06	0.980633	506221	7.18509e+06	14.1936
P70181	PI51B	Pip5k1b	Phosphatidylinositol 4-phosphate 5-kinase type-1 beta (PIP5KI-beta) (PtdIns(4)P-5-kinase 1 beta) (EC 2.7.1.68) (68 kDa type I phosphatidylinositol 4-phosphate 5-kinase beta) (Phosphatidylinositol 4-phosphate 5-kinase type I alpha) (PIP5KIalpha) (Phosphatidylinositol 4-phosphate 5-kinase type I beta) (PIP5KIbeta)				506221	7.17941e+06	14.1824
Q64338	PDE1C	Pde1c	Calcium/calmodulin-dependent 3',5'-cyclic nucleotide phosphodiesterase 1C (Cam-PDE 1C) (3',5'-cyclic-AMP phosphodiesterase) (EC 3.1.4.-) (3',5'-cyclic-GMP phosphodiesterase) (EC 3.1.4.35)				506221	7.15468e+06	14.1335
P28665	MUG1	Mug1	Murinoglobulin-1 (MuG1)	1.51576e+07	3.47854e+07	2.29492	506221	7.12546e+06	14.0758
P58196	PLS4	Plscr4	Phospholipid scramblase 4 (PL scramblase 4) (Ca(2+)-dependent phospholipid scramblase 4)	678411	2.75831e+06	4.06585	506221	7.04296e+06	13.9128
Q8VC85	LSM1	Lsm1	U6 snRNA-associated Sm-like protein LSm1	1.46753e+07	678411	0.0462281	506221	7.00948e+06	13.8467
Q6P5H6	FRMD5	Frmd5	FERM domain-containing protein 5				506221	6.95554e+06	13.7401
Q9JLM4	ZMYM3	Zmym3	Zinc finger MYM-type protein 3 (DXHXS6673E protein) (Zinc finger protein 261)				506221	6.90964e+06	13.6495
A2ARP1	VIP1	Ppip5k1	Inositol hexakisphosphate and diphosphoinositol-pentakisphosphate kinase 1 (EC 2.7.4.21) (EC 2.7.4.24) (Diphosphoinositol pentakisphosphate kinase 1) (Histidine acid phosphatase domain-containing protein 2A) (InsP6 and PP-IP5 kinase 1) (VIP1 homolog)	2.23508e+07	1.89313e+07	0.84701	506221	6.84808e+06	13.5279
Q8VCN5	CGL	Cth	Cystathionine gamma-lyase (EC 4.4.1.1) (Cysteine-protein sulfhydrase) (Gamma-cystathionase)	1.2689e+07	1.43855e+07	1.1337	506221	6.83739e+06	13.5067
Q6Q899	DDX58	Ddx58	Antiviral innate immune response receptor RIG-I (DEAD box protein 58) (Probable ATP-dependent RNA helicase DDX58) (EC 3.6.4.13) (RIG-I-like receptor 1) (RLR-1) (Retinoic acid-inducible gene 1 protein) (RIG-1) (Retinoic acid-inducible gene I protein) (RIG-I)	678411	1.06248e+07	15.6612	506221	6.83702e+06	13.506
Q8K031	STAR8	Stard8	StAR-related lipid transfer protein 8 (START domain-containing protein 8) (StARD8)				506221	6.82814e+06	13.4885
Q5Y5T1	ZDH20	Zdhhc20	Palmitoyltransferase ZDHHC20 (EC 2.3.1.225) (Acyltransferase ZDHHC20) (EC 2.3.1.-) (DHHC domain-containing cysteine-rich protein 20) (DHHC-20) (Zinc finger DHHC domain-containing protein 20)	678411	5.17887e+06	7.63383	506221	6.68193e+06	13.1996
Q8CCH2	NHLC3	Nhlrc3	NHL repeat-containing protein 3				506221	6.66506e+06	13.1663
Q9CQG1	CHAC2	Chac2	Putative glutathione-specific gamma-glutamylcyclotransferase 2 (Gamma-GCG 2) (EC 4.3.2.7) (Cation transport regulator-like protein 2)				506221	6.60384e+06	13.0454
Q9DA69	IFT43	Ift43	Intraflagellar transport protein 43 homolog	678411	3.16138e+06	4.65998	506221	6.5975e+06	13.0329
Q08879	FBLN1	Fbln1	Fibulin-1 (FIBL-1) (Basement-membrane protein 90) (BM-90)				506221	6.52198e+06	12.8837
Q3TNL8	IPRI	Itprip	Inositol 1,4,5-trisphosphate receptor-interacting protein				506221	6.5193e+06	12.8784
P22366	MYD88	Myd88	Myeloid differentiation primary response protein MyD88				506221	6.4957e+06	12.8318
Q4FK66	PR38A	Prpf38a	Pre-mRNA-splicing factor 38A				506221	6.48031e+06	12.8013
P97479	MYO7A	Myo7a	Unconventional myosin-VIIa	678411	1.51052e+07	22.2656	506221	6.45513e+06	12.7516
Q8C6G1	CF410	Cfap410	Cilia- and flagella-associated protein 410	678411	8.33805e+06	12.2906	506221	6.41036e+06	12.6632
Q9WVS7	MP2K5	Map2k5	Dual specificity mitogen-activated protein kinase kinase 5 (MAP kinase kinase 5) (MAPKK 5) (EC 2.7.12.2) (MAPK/ERK kinase 5) (MEK 5)	678411	2.22011e+07	32.7252	506221	6.40184e+06	12.6463
P0C7M9	CLC2L	Clec2l	C-type lectin domain family 2 member L	2.35367e+07	2.71006e+07	1.15142	506221	6.38598e+06	12.615
Q9WVI9	JIP1	Mapk8ip1	C-Jun-amino-terminal kinase-interacting protein 1 (JIP-1) (JNK-interacting protein 1) (Islet-brain-1) (IB-1) (JNK MAP kinase scaffold protein 1) (Mitogen-activated protein kinase 8-interacting protein 1)	1.69136e+07	1.7215e+07	1.01782	910687	1.14566e+07	12.5802
O55028	BCKD	Bckdk	[3-methyl-2-oxobutanoate dehydrogenase [lipoamide]] kinase, mitochondrial (EC 2.7.11.4) (Branched-chain alpha-ketoacid dehydrogenase kinase) (BCKD-kinase) (BCKDHKIN)	4.79968e+07	678411	0.0141345	506221	6.33687e+06	12.518
Q9D8Z2	TRIA1	Triap1	TP53-regulated inhibitor of apoptosis 1 (Protein 15E1.1) (WF-1) (p53-inducible cell-survival factor) (p53CSV)				5.30145e+07	6.58056e+08	12.4128
Q91YI4	ARRB2	Arrb2	Beta-arrestin-2 (Arrestin beta-2)	1.33472e+07	7.00212e+06	0.524611	506221	6.22476e+06	12.2965
P12246	SAMP	Apcs	Serum amyloid P-component (SAP)				506221	6.11434e+06	12.0784
P03958	ADA	Ada	Adenosine deaminase (EC 3.5.4.4) (Adenosine aminohydrolase)				506221	6.07507e+06	12.0008
Q9DCH6	ZFAN6	Zfand6	AN1-type zinc finger protein 6 (Associated with PRK1 protein) (Zinc finger A20 domain-containing protein 3)				506221	5.99581e+06	11.8443
P12265	BGLR	Gusb	Beta-glucuronidase (EC 3.2.1.31)				506221	5.97827e+06	11.8096
Q80U38	KHNYN	Khnyn	Protein KHNYN (KH and NYN domain-containing protein)				506221	5.97027e+06	11.7938
Q61703	ITIH2	Itih2	Inter-alpha-trypsin inhibitor heavy chain H2 (ITI heavy chain H2) (ITI-HC2) (Inter-alpha-inhibitor heavy chain 2)				506221	5.89276e+06	11.6407
Q8BT14	CNOT4	Cnot4	CCR4-NOT transcription complex subunit 4 (EC 2.3.2.27) (CCR4-associated factor 4) (E3 ubiquitin-protein ligase CNOT4) (Potential transcriptional repressor NOT4Hp) (RING-type E3 ubiquitin transferase CNOT4)				506221	5.75498e+06	11.3685
Q8R1C0	KCNC4	Kcnc4	Potassium voltage-gated channel subfamily C member 4 (Voltage-gated potassium channel subunit Kv3.4)				506221	5.74936e+06	11.3574
Q3TIU4	PDE12	Pde12	2',5'-phosphodiesterase 12 (2'-PDE) (2-PDE) (EC 3.1.4.-) (Mitochondrial deadenylase) (EC 3.1.13.4)	1.38641e+07	678411	0.048933	506221	5.7369e+06	11.3328
Q3V172	SE1L2	Sel1l2	Protein sel-1 homolog 2 (Suppressor of lin-12-like protein 2) (Sel-1L2)				506221	5.66853e+06	11.1977
Q80XP9	WNK3	Wnk3	Serine/threonine-protein kinase WNK3 (EC 2.7.11.1) (Protein kinase lysine-deficient 3) (Protein kinase with no lysine 3)				506221	5.64559e+06	11.1524
Q32NY4	CNNM3	Cnnm3	Metal transporter CNNM3 (Ancient conserved domain-containing protein 3) (mACDP3) (Cyclin-M3)	678411	7.87405e+07	116.066	506221	5.63293e+06	11.1274
Q9WVM3	APC7	Anapc7	Anaphase-promoting complex subunit 7 (APC7) (Cyclosome subunit 7) (Prediabetic NOD sera-reactive autoantigen)	7.94656e+06	678411	0.0853717	506221	5.61725e+06	11.0964
Q9DBH0	WWP2	Wwp2	NEDD4-like E3 ubiquitin-protein ligase WWP2 (EC 2.3.2.26) (HECT-type E3 ubiquitin transferase WWP2) (WW domain-containing protein 2)	1.35273e+07	678411	0.0501514	506221	5.57265e+06	11.0084
Q9ER38	TOR3A	Tor3a	Torsin-3A (ATP-dependent interferon-responsive protein) (Torsin family 3 member A)				506221	5.52863e+06	10.9214
Q3V4B5	COMD6	Commd6	COMM domain-containing protein 6	2.86241e+07	2.98904e+07	1.04424	506221	5.50899e+06	10.8826
Q08890	IDS	Ids	Iduronate 2-sulfatase (EC 3.1.6.13) (Alpha-L-iduronate sulfate sulfatase)	1.56106e+07	678411	0.0434584	506221	5.47172e+06	10.809
P70365	NCOA1	Ncoa1	Nuclear receptor coactivator 1 (NCoA-1) (EC 2.3.1.48) (Nuclear receptor coactivator protein 1) (mNRC-1) (Steroid receptor coactivator 1) (SRC-1)				506221	5.46761e+06	10.8008
Q02257	PLAK	Jup	Junction plakoglobin (Desmoplakin III) (Desmoplakin-3)	2.18853e+07	1.64268e+07	0.750584	1.97541e+07	2.11365e+08	10.6998
Q9Z1X2	PTSS2	Ptdss2	Phosphatidylserine synthase 2 (PSS-2) (PtdSer synthase 2) (EC 2.7.8.29) (Serine-exchange enzyme II)	6.74758e+06	678411	0.100541	506221	5.38482e+06	10.6373
Q8C7E9	CSTFT	Cstf2t	Cleavage stimulation factor subunit 2 tau variant (CF-1 64 kDa subunit tau variant) (Cleavage stimulation factor 64 kDa subunit tau variant) (CSTF 64 kDa subunit tau variant) (TauCstF-64)	678411	1.11656e+07	16.4585	506221	5.37526e+06	10.6184
Q9DA08	SGF29	Sgf29	SAGA-associated factor 29 (Coiled-coil domain-containing protein 101) (SAGA complex-associated factor 29)				506221	5.3488e+06	10.5662
Q61696	HS71A	Hspa1a	Heat shock 70 kDa protein 1A (Heat shock 70 kDa protein 3) (HSP70.3) (Hsp68)	1.54934e+08	3.99202e+07	0.257659	506221	5.3306e+06	10.5302
Q6ZWR4	2ABB	Ppp2r2b	Serine/threonine-protein phosphatase 2A 55 kDa regulatory subunit B beta isoform (PP2A subunit B isoform B55-beta) (PP2A subunit B isoform PR55-beta) (PP2A subunit B isoform R2-beta) (PP2A subunit B isoform beta)	1.05217e+07	678411	0.064477	506221	5319860	10.509
P01899	HA11	H2-D1	H-2 class I histocompatibility antigen, D-B alpha chain (H-2D(B))	678411	2.89216e+07	42.6314	506221	5.30394e+06	10.4775
P82343	RENBP	Renbp	N-acylglucosamine 2-epimerase (AGE) (EC 5.1.3.8) (GlcNAc 2-epimerase) (N-acetyl-D-glucosamine 2-epimerase) (Renin-binding protein) (RnBP)	678411	4.43613e+07	65.39	506221	5.29574e+06	10.4613
Q3UKC1	TAXB1	Tax1bp1	Tax1-binding protein 1 homolog	1.1395e+07	1.34643e+07	1.18159	506221	5.2653e+06	10.4012
Q8BIF9	ZN787	Znf787	Zinc finger protein 787	678411	3.21313e+06	4.73626	506221	5.25633e+06	10.3835
Q9D483	RPC3	Polr3c	DNA-directed RNA polymerase III subunit RPC3 (RNA polymerase III subunit C3) (DNA-directed RNA polymerase III subunit C)				506221	5.20078e+06	10.2737
P54276	MSH6	Msh6	DNA mismatch repair protein Msh6 (G/T mismatch-binding protein) (GTBP) (GTMBP) (MutS protein homolog 6) (MutS-alpha 160 kDa subunit) (p160)				506221	5.19968e+06	10.2716
Q91YR9	PTGR1	Ptgr1	Prostaglandin reductase 1 (PRG-1) (15-oxoprostaglandin 13-reductase) (EC 1.3.1.48) (Dithiolethione-inducible gene 1 protein) (D3T-inducible gene 1 protein) (DIG-1) (Leukotriene B4 12-hydroxydehydrogenase) (NAD(P)H-dependent alkenal/one oxidoreductase) (EC 1.3.1.74)				506221	5.19112e+06	10.2547
Q9Z2B9	KS6A4	Rps6ka4	Ribosomal protein S6 kinase alpha-4 (S6K-alpha-4) (EC 2.7.11.1) (90 kDa ribosomal protein S6 kinase 4) (Nuclear mitogen- and stress-activated protein kinase 2) (RSK-like protein kinase) (RLSK)				506221	5.14071e+06	10.1551
Q5SNZ0	GRDN	Ccdc88a	Girdin (Akt phosphorylation enhancer) (APE) (Coiled-coil domain-containing protein 88A) (G alpha-interacting vesicle-associated protein) (GIV) (Girders of actin filament) (Hook-related protein 1) (HkRP1)	1.59488e+07	1.8374e+07	1.15206	8.21275e+06	8.26055e+07	10.0582
Q9D2Z4	SENP8	Senp8	Sentrin-specific protease 8 (EC 3.4.22.-) (Deneddylase-1) (NEDD8-specific protease 1) (Sentrin/SUMO-specific protease SENP8)	1.30958e+07	1.13208e+07	0.864456	506221	5.01157e+06	9.89996
P52624	UPP1	Upp1	Uridine phosphorylase 1 (UPase 1) (UrdPase 1) (EC 2.4.2.3)	3.91068e+06	7.52772e+06	1.92491	506221	4.9632e+06	9.80442
Q9D2R4	TMD11	Tmed11	Transmembrane emp24 domain-containing protein 11 (Glycoprotein 25L) (GP25L) (p24 family protein alpha-1) (p24alpha1)				506221	4.93307e+06	9.74489
Q7TQK4	EXOS3	Exosc3	Exosome complex component RRP40 (EC 3.1.13.-) (Exosome component 3) (Ribosomal RNA-processing protein 40)				506221	4.9004e+06	9.68036
Q9D706	RPAP3	Rpap3	RNA polymerase II-associated protein 3	9.33227e+06	7.53323e+06	0.807224	506221	4.84919e+06	9.5792
Q9JJE4	PAQR4	Paqr4	Progestin and adipoQ receptor family member 4 (Progestin and adipoQ receptor family member IV)	678411	4.65003e+06	6.8543	506221	4.81595e+06	9.51354
Q8BJU0	SGTA	Sgta	Small glutamine-rich tetratricopeptide repeat-containing protein alpha (Alpha-SGT)	2.31086e+08	2.22503e+09	9.6286	2.20113e+08	2.09245e+09	9.50625
Q9CZP7	CD37L	Cdc37l1	Hsp90 co-chaperone Cdc37-like 1				506221	4.80822e+06	9.49828
A2AM05	CNTLN	Cntln	Centlein (Centrosomal protein)				506221	4.78672e+06	9.4558
Q8CJ53	CIP4	Trip10	Cdc42-interacting protein 4 (Thyroid receptor-interacting protein 10) (TR-interacting protein 10) (TRIP-10)				506221	4.77679e+06	9.43619
Q0VBF2	TM52B	Tmem52b	Transmembrane protein 52B				506221	4.76951e+06	9.42179
Q8VI23	S12A8	Slc12a8	Solute carrier family 12 member 8 (Cation-chloride cotransporter 9)				506221	4.69775e+06	9.28005
Q9JLM9	GRB14	Grb14	Growth factor receptor-bound protein 14 (GRB14 adapter protein)				506221	4.68085e+06	9.24666
O08852	PKD1	Pkd1	Polycystin-1 (Autosomal dominant polycystic kidney disease 1 protein homolog)				506221	4.56738e+06	9.0225
Q61011	GBB3	Gnb3	Guanine nucleotide-binding protein G(I)/G(S)/G(T) subunit beta-3 (Transducin beta chain 3)	3.96338e+06	678411	0.17117	506221	4.4763e+06	8.84259
Q8CIV2	MBRL	Tmem259	Membralin (Transmembrane protein 259)				506221	4.44429e+06	8.77935
Q80YQ2	MED23	Med23	Mediator of RNA polymerase II transcription subunit 23 (Cofactor required for Sp1 transcriptional activation subunit 3) (CRSP complex subunit 3) (Mediator complex subunit 23) (Protein sur-2 homolog) (mSur-2)	678411	3.53995e+06	5.21801	506221	4.42386e+06	8.73899
Q9QYE6	GOGA5	Golga5	Golgin subfamily A member 5 (Golgin-84) (Protein Ret-II) (Protein Sumiko)	678411	7.5412e+06	11.116	506221	4.35743e+06	8.60777
Q9EQT6	SYT13	Syt13	Synaptotagmin-13 (Synaptotagmin XIII) (SytXIII)	5.28223e+06	1.04633e+07	1.98085	506221	4.3438e+06	8.58085
Q6NZK8	PTPC1	Ptpdc1	Protein tyrosine phosphatase domain-containing protein 1 (EC 3.1.3.-)	678411	8.05525e+06	11.8737	506221	4.33568e+06	8.56479
Q8VDP3	MICA1	Mical1	[F-actin]-monooxygenase MICAL1 (EC 1.14.13.225) (Molecule interacting with CasL protein 1) (MICAL-1) (mMical1) (NEDD9-interacting protein with calponin homology and LIM domains)	678411	3.32645e+06	4.90329	506221	4.30984e+06	8.51376
Q6P4T0	ATG2A	Atg2a	Autophagy-related protein 2 homolog A	7.47965e+06	678411	0.0907009	506221	4.27437e+06	8.44368
Q9CWX9	DDX47	Ddx47	Probable ATP-dependent RNA helicase DDX47 (EC 3.6.4.13) (DEAD box protein 47)				506221	4.2484e+06	8.39239
P56183	RRP1	Rrp1	Ribosomal RNA processing protein 1 homolog A (Novel nuclear protein 1) (NNP-1) (Nucleolar protein Nop52) (RRP1-like protein)	5.03251e+06	4.8944e+06	0.972557	506221	4.22415e+06	8.34448
P29452	CASP1	Casp1	Caspase-1 (CASP-1) (EC 3.4.22.36) (Interleukin-1 beta convertase) (IL-1BC) (Interleukin-1 beta-converting enzyme) (ICE) (IL-1 beta-converting enzyme) (p45) [Cleaved into: Caspase-1 subunit p20; Caspase-1 subunit p10]	678411	2.22177e+08	327.496	506221	4.1719e+06	8.24128
Q6NWV3	IF122	Ift122	Intraflagellar transport protein 122 homolog (WD repeat-containing protein 10)				506221	4.15761e+06	8.21303
Q8CB44	GRAM4	Gramd4	GRAM domain-containing protein 4 (Death-inducing protein)				506221	4.13819e+06	8.17468
Q9R0E1	PLOD3	Plod3	Multifunctional procollagen lysine hydroxylase and glycosyltransferase LH3 [Includes: Procollagen-lysine,2-oxoglutarate 5-dioxygenase 3 (EC 1.14.11.4) (Lysyl hydroxylase 3) (LH3); Procollagen glycosyltransferase (EC 2.4.1.50) (EC 2.4.1.66) (Galactosylhydroxylysine-glucosyltransferase) (Procollagen galactosyltransferase) (Procollagen glucosyltransferase)]				506221	4.12587e+06	8.15034
Q3UFT3	GARE1	Garem1	GRB2-associated and regulator of MAPK protein (GRB2-associated and regulator of MAPK1)	1.3959e+07	678411	0.0486003	5.94917e+06	4.80912e+07	8.08367
Q8K0V4	CNOT3	Cnot3	CCR4-NOT transcription complex subunit 3 (CCR4-associated factor 3)	4.43295e+07	2.28322e+07	0.515058	3.75913e+06	3.0374e+07	8.08007
Q62074	KPCI	Prkci	Protein kinase C iota type (EC 2.7.11.13) (Atypical protein kinase C-lambda/iota) (aPKC-lambda/iota) (nPKC-iota)	9.00749e+06	8.88822e+06	0.986759	506221	4.06345e+06	8.02703
Q0QWG9	GRD2I	Grid2ip	Delphilin (Glutamate receptor, ionotropic, delta 2-interacting protein 1)				506221	4.05452e+06	8.00939
Q8K330	SSH3	Ssh3	Protein phosphatase Slingshot homolog 3 (EC 3.1.3.16) (EC 3.1.3.48) (SSH-like protein 3) (SSH-3L) (mSSH-3L)				506221	4.03901e+06	7.97875
O35594	IFT81	Ift81	Intraflagellar transport protein 81 homolog (Carnitine deficiency-associated protein expressed in ventricle 1) (CDV-1)	1.0211e+07	678411	0.066439	506221	4.00999e+06	7.92143
Q99MS8	TPGS1	Tpgs1	Tubulin polyglutamylase complex subunit 1 (PGs1) (p32)				2.47359e+06	1.94905e+07	7.87941
E9Q6P5	TTC7B	Ttc7b	Tetratricopeptide repeat protein 7B (TPR repeat protein 7B)	7.72101e+08	7.47945e+08	0.968713	1.29075e+08	1.01348e+09	7.85189
Q9WVH4	FOXO3	Foxo3	Forkhead box protein O3				506221	3.97088e+06	7.84416
Q3TXU5	DHYS	Dhps	Deoxyhypusine synthase (DHS) (EC 2.5.1.46)				506221	3.8711e+06	7.64706
O89032	SPD2A	Sh3pxd2a	SH3 and PX domain-containing protein 2A (Five SH3 domain-containing protein) (SH3 multiple domains protein 1) (Tyrosine kinase substrate with five SH3 domains)				506221	3.77234e+06	7.45197
Q03147	CDK7	Cdk7	Cyclin-dependent kinase 7 (EC 2.7.11.22) (EC 2.7.11.23) (39 kDa protein kinase) (P39 Mo15) (CDK-activating kinase) (CR4 protein kinase) (CRK4) (Cell division protein kinase 7) (Protein-tyrosine kinase MPK-7) (TFIIH basal transcription factor complex kinase subunit)	3.16138e+06	678411	0.214593	506221	3.76374e+06	7.43498
Q6S5L9	SHC4	Shc4	SHC-transforming protein 4 (Rai-like protein) (RaLP) (SHC-transforming protein D) (mShcD) (Src homology 2 domain-containing-transforming protein C4) (SH2 domain protein C4)				506221	3.75913e+06	7.42587
Q9CQA6	CHCH1	Chchd1	Coiled-coil-helix-coiled-coil-helix domain-containing protein 1 (28S ribosomal protein S37, mitochondrial) (MRP-S37)	5.52602e+06	6.00577e+06	1.08682	4.27437e+06	3.15827e+07	7.38886
Q91VX2	UBAP2	Ubap2	Ubiquitin-associated protein 2 (UBAP-2) (Protein lingerer homolog 1) (mLig-1)	1.23451e+07	1.05333e+07	0.853239	506221	3.72765e+06	7.36369
Q91W61	FXL15	Fbxl15	F-box/LRR-repeat protein 15 (F-box only protein 37)	1.84095e+07	1.39897e+07	0.75992	506221	3.69691e+06	7.30296
P50571	GBRB1	Gabrb1	Gamma-aminobutyric acid receptor subunit beta-1 (GABA(A) receptor subunit beta-1)	1.04056e+08	678411	0.00651968	1.42234e+07	1.03601e+08	7.28389
Q9JLV5	CUL3	Cul3	Cullin-3 (CUL-3)	1.59833e+08	1.54492e+08	0.966581	1.73279e+08	1.26183e+09	7.28207
Q9CZQ9	BBS5	Bbs5	Bardet-Biedl syndrome 5 protein homolog				506221	3.67313e+06	7.25598
Q5FW52	MLIP	Mlip	Muscular LMNA-interacting protein (Cardiac Isl1-interacting protein) (CIP) (Muscular-enriched A-type laminin-interacting protein)	2.19191e+07	1.48439e+07	0.677213	506221	3.66965e+06	7.24912
Q8BX57	PXK	Pxk	PX domain-containing protein kinase-like protein (Modulator of Na,K-ATPase) (MONaKA)				506221	3.65858e+06	7.22725
Q8C4B4	U119B	Unc119b	Protein unc-119 homolog B				506221	3.64354e+06	7.19754
Q8BH74	NU107	Nup107	Nuclear pore complex protein Nup107 (107 kDa nucleoporin) (Nucleoporin Nup107)	7.26281e+06	2.15157e+07	2.96245	506221	3.52118e+06	6.95581
Q99LG4	TTC5	Ttc5	Tetratricopeptide repeat protein 5 (TPR repeat protein 5) (Stress-responsive activator of p300)	1.14965e+07	9.65339e+06	0.839682	506221	3.41053e+06	6.73724
Q80U44	ZFY16	Zfyve16	Zinc finger FYVE domain-containing protein 16 (Endofin) (Endosomal-associated FYVE domain protein)				506221	3.371e+06	6.65916
Q8K224	NAT10	Nat10	RNA cytidine acetyltransferase (EC 2.3.1.-) (18S rRNA cytosine acetyltransferase) (N-acetyltransferase 10)	6.7748e+06	5.74431e+06	0.847894	6.7361e+06	4.48117e+07	6.65248
Q8BZM1	GLMN	Glmn	Glomulin (FK506-binding protein-associated protein) (FAP) (FKBP-associated protein)	2.24483e+07	7.28222e+06	0.3244	506221	3.36167e+06	6.64072
Q9JHJ3	GLMP	Glmp	Glycosylated lysosomal membrane protein (Lysosomal protein NCU-G1)				506221	3.34713e+06	6.612
Q6QI06	RICTR	Rictor	Rapamycin-insensitive companion of mTOR (AVO3 homolog) (mAVO3) (Protein pianissimo)	4.02088e+06	7.48731e+06	1.86211	506221	3.32971e+06	6.57759
Q922U1	PRPF3	Prpf3	U4/U6 small nuclear ribonucleoprotein Prp3 (Pre-mRNA-splicing factor 3)	1.06093e+07	678411	0.0639447	506221	3.29469e+06	6.50841
Q91YU6	LZTS2	Lzts2	Leucine zipper putative tumor suppressor 2 (Protein LAPSER1)				784230	5.04936e+06	6.43861
Q6P8J2	SAT2	Sat2	Thialysine N-epsilon-acetyltransferase (EC 2.3.1.-) (Diamine acetyltransferase 2) (EC 2.3.1.57) (Spermidine/spermine N(1)-acetyltransferase 2) (SSAT-2)	1.21247e+07	678411	0.0559528	506221	3.22141e+06	6.36365
A6H6E2	MMRN2	Mmrn2	Multimerin-2				506221	3.15816e+06	6.23871
Q8K337	I5P2	Inpp5b	Type II inositol 1,4,5-trisphosphate 5-phosphatase (EC 3.1.3.36) (Inositol polyphosphate-5-phosphatase B) (Phosphoinositide 5-phosphatase) (5PTase)	6.81992e+06	9.74122e+06	1.42835	2.65234e+06	1.64834e+07	6.21466
Q6S5J6	KRIT1	Krit1	Krev interaction trapped protein 1 (Krev interaction trapped 1) (Cerebral cavernous malformations 1 protein homolog)	678411	3.23698e+06	4.77141	506221	3.10915e+06	6.14188
Q6A037	N4BP1	N4bp1	NEDD4-binding protein 1 (N4BP1) (EC 3.1.-.-)				506221	3.07326e+06	6.07098
Q61626	GRIK5	Grik5	Glutamate receptor ionotropic, kainate 5 (GluK5) (Glutamate receptor KA-2) (KA2) (Glutamate receptor gamma-2) (GluR gamma-2)	7.86041e+06	5.89336e+06	0.749752	506221	3.07072e+06	6.06597
Q8CFS6	KCNV2	Kcnv2	Potassium voltage-gated channel subfamily V member 2 (Voltage-gated potassium channel subunit Kv8.2)				506221	3.04293e+06	6.01108
Q9Z0P4	PALM	Palm	Paralemmin-1 (Paralemmin)	8.76388e+08	7.80891e+08	0.891033	1.75391e+08	1.05065e+09	5.99032
Q6P9R4	ARHGI	Arhgef18	Rho guanine nucleotide exchange factor 18	1.52619e+07	8.33043e+06	0.545833	4.9632e+06	2.94454e+07	5.93274
Q8K1K4	CENPI	Cenpi	Centromere protein I (CENP-I) (FSH primary response protein 1) (Follicle-stimulating hormone primary response protein)				506221	2.98467e+06	5.89598
Q9CQV6	MLP3B	Map1lc3b	Microtubule-associated proteins 1A/1B light chain 3B (Autophagy-related protein LC3 B) (Autophagy-related ubiquitin-like modifier LC3 B) (MAP1 light chain 3-like protein 2) (MAP1A/MAP1B light chain 3 B) (MAP1A/MAP1B LC3 B) (Microtubule-associated protein 1 light chain 3 beta)	1.21411e+09	1.25193e+09	1.03115	1.68633e+08	9.91811e+08	5.88148
P62500	T22D1	Tsc22d1	TSC22 domain family protein 1 (Regulatory protein TSC-22) (TGFB-stimulated clone 22 homolog) (TSC22-related inducible leucine zipper 1b) (Transforming growth factor beta-1-induced transcript 4 protein)	7.30603e+07	1.81472e+08	2.48386	1.81697e+07	1.06083e+08	5.83849
Q9JKW0	AR6P1	Arl6ip1	ADP-ribosylation factor-like protein 6-interacting protein 1 (ARL-6-interacting protein 1) (Aip-1) (Protein TBX2)	7.98167e+07	9.07135e+07	1.13652	2.57579e+07	1.50214e+08	5.83175
Q61043	NIN	Nin	Ninein				506221	2.90985e+06	5.74819
Q7TSF4	LR75A	Lrrc75a	Leucine-rich repeat-containing protein 75A (Leucine-rich repeat-containing protein FAM211A)	678411	4.52615e+06	6.67169	506221	2.9043e+06	5.73722
Q9CW03	SMC3	Smc3	Structural maintenance of chromosomes protein 3 (SMC protein 3) (SMC-3) (Basement membrane-associated chondroitin proteoglycan) (Bamacan) (Chondroitin sulfate proteoglycan 6) (Chromosome segregation protein SmcD) (Mad member-interacting protein 1)	1.19962e+08	7.63653e+07	0.636581	1.86288e+07	1.06876e+08	5.73712
A2TJV2	PALM3	Palm3	Paralemmin-3	4.38054e+06	678411	0.154869	506221	2.7988e+06	5.52881
P97785	GFRA1	Gfra1	GDNF family receptor alpha-1 (GDNF receptor alpha-1) (GDNFR-alpha-1) (GFR-alpha-1) (TGF-beta-related neurotrophic factor receptor 1)	9.41703e+06	1.71119e+07	1.81712	5319860	2.92026e+07	5.48935
Q99LM2	CK5P3	Cdk5rap3	CDK5 regulatory subunit-associated protein 3	678411	6.80257e+06	10.0272	506221	2.76557e+06	5.46317
Q925T6	GRIP1	Grip1	Glutamate receptor-interacting protein 1 (GRIP-1)	1.62032e+07	1.74236e+07	1.07532	1.08881e+07	5.94709e+07	5.46201
O35744	CHIL3	Chil3	Chitinase-like protein 3 (EC 3.2.1.52) (Beta-N-acetylhexosaminidase Ym1) (Chitinase-3-like protein 3) (ECF-L) (Eosinophil chemotactic cytokine) (Secreted protein Ym1)				506221	2.72169e+06	5.37648
A2A6A1	GPTC8	Gpatch8	G patch domain-containing protein 8				506221	2.65234e+06	5.23949
Q8BQ30	PPR18	Ppp1r18	Phostensin (Protein phosphatase 1 F-actin cytoskeleton-targeting subunit) (Protein phosphatase 1 regulatory subunit 18)	2.80325e+07	678411	0.0242009	2.37753e+07	1.23909e+08	5.21168
Q9WTJ8	FA50B	Fam50b	Protein FAM50B (Protein XAP-5-like)				506221	2.63448e+06	5.20421
Q3TIR3	RIC8A	Ric8a	Synembryn-A (Protein Ric-8A)	9.56393e+07	1.13022e+08	1.18176	3.00505e+07	1.55293e+08	5.16774
Q3UFQ8	CARL3	Carmil3	Capping protein, Arp2/3 and myosin-I linker protein 3 (Capping protein regulator and myosin 1 linker protein 3) (Leucine-rich repeat-containing protein 16B)	6.20855e+06	678411	0.10927	506221	2.59292e+06	5.12211
P97346	NXN	Nxn	Nucleoredoxin (EC 1.8.1.8) (Protein Red-1)	678411	3.88592e+06	5.72798	506221	2.57002e+06	5.07687
E9Q9A9	OAS2	Oas2	2'-5'-oligoadenylate synthase 2 ((2-5')oligo(A) synthase 2) (2-5A synthase 2) (EC 2.7.7.84) (2',5'-oligoadenylate synthetase-like 11)				506221	2.55404e+06	5.04531
Q7TMY7	IPO8	Ipo8	Importin-8 (Imp8) (Ran-binding protein 8) (RanBP8)	3.1285e+06	678411	0.216848	506221	2.53234e+06	5.00244
Q8VDU5	SNRK	Snrk	SNF-related serine/threonine-protein kinase (EC 2.7.11.1) (SNF1-related kinase)	8.82363e+06	1.26558e+07	1.43431	3.05418e+06	1.47724e+07	4.83677
Q9DAK2	PACRG	Pacrg	Parkin coregulated gene protein homolog (Hypertension-related protein 1-like protein) (PARK2 coregulated gene protein)				506221	2.44766e+06	4.83517
P51910	APOD	Apod	Apolipoprotein D (Apo-D) (ApoD)	678411	7.07328e+07	104.262	7.28635e+07	3.51276e+08	4.82102
G3X9J0	SI1L3	Sipa1l3	Signal-induced proliferation-associated 1-like protein 3 (SIPA1-like protein 3) (SPA-1-like protein 3)	4.3711e+07	4.12331e+07	0.943312	1.61894e+07	7.75162e+07	4.78808
P70182	PI51A	Pip5k1a	Phosphatidylinositol 4-phosphate 5-kinase type-1 alpha (PIP5K1-alpha) (PtdIns(4)P-5-kinase 1 alpha) (EC 2.7.1.68) (68 kDa type I phosphatidylinositol 4-phosphate 5-kinase alpha) (Phosphatidylinositol 4-phosphate 5-kinase type I alpha) (PIP5KIalpha) (Phosphatidylinositol 4-phosphate 5-kinase type I beta) (PI4P5KIbeta)	3.36915e+07	3.31465e+07	0.983823	1.76558e+07	8.41875e+07	4.76826
Q8C050	KS6A5	Rps6ka5	Ribosomal protein S6 kinase alpha-5 (S6K-alpha-5) (EC 2.7.11.1) (90 kDa ribosomal protein S6 kinase 5) (Nuclear mitogen- and stress-activated protein kinase 1) (RSK-like protein kinase) (RLSK)	1.58134e+07	1.7289e+07	1.09331	1.36883e+07	6.50511e+07	4.7523
Q8CGB6	TNS2	Tns2	Tensin-2 (EC 3.1.3.48) (C1 domain-containing phosphatase and tensin homolog) (C1-TEN) (Tensin-like C1 domain-containing phosphatase)				506221	2.38871e+06	4.71871
Q80TR8	DCAF1	Dcaf1	DDB1- and CUL4-associated factor 1 (Serine/threonine-protein kinase VPRBP) (EC 2.7.11.1)	678411	1.22697e+08	180.859	506221	2.37359e+06	4.68885
Q8BTZ7	GMPPB	Gmppb	Mannose-1-phosphate guanyltransferase beta (EC 2.7.7.13) (GDP-mannose pyrophosphorylase B) (GTP-mannose-1-phosphate guanylyltransferase beta)	3.71067e+07	6.32948e+07	1.70575	7.12498e+06	3.3265e+07	4.66878
Q9DBY4	TRIL	Tril	TLR4 interactor with leucine rich repeats (Leucine-rich repeat-containing protein KIAA0644)				506221	2.35195e+06	4.64609
Q8K4P0	WDR33	Wdr33	pre-mRNA 3' end processing protein WDR33 (WD repeat-containing protein 33) (WD repeat-containing protein of 146 kDa)	9.74122e+06	6.7748e+06	0.695477	1.21034e+06	5.48884e+06	4.53494
Q9R049	AMFR	Amfr	E3 ubiquitin-protein ligase AMFR (EC 2.3.2.36) (Autocrine motility factor receptor) (AMF receptor) (RING-type E3 ubiquitin transferase AMFR)	8.22637e+06	5.58264e+06	0.678628	2.38871e+06	1.06745e+07	4.46872
Q9ERA0	TFCP2	Tfcp2	Alpha-globin transcription factor CP2	678411	1.53225e+07	22.5859	1.32806e+06	5.78489e+06	4.35588
Q7TNE1	SUCHY	Sugct	Succinate--hydroxymethylglutarate CoA-transferase (EC 2.8.3.13) (SuccinylCoA:glutarate-CoA transferase)				506221	2.19385e+06	4.33378
Q9JHW4	SELB	Eefsec	Selenocysteine-specific elongation factor (Elongation factor sec) (Eukaryotic elongation factor, selenocysteine-tRNA-specific) (mSelB)	1.80546e+07	1.93087e+07	1.06946	5.37526e+06	2.32122e+07	4.31834
Q9CQN3	TOM6	Tomm6	Mitochondrial import receptor subunit TOM6 homolog (Overexpressed breast tumor protein homolog) (Translocase of outer membrane 6 kDa subunit homolog)	2.45139e+07	2.81794e+07	1.14953	1.95482e+07	8.41191e+07	4.30317
Q9Z1T2	TSP4	Thbs4	Thrombospondin-4	2.71006e+07	2.34122e+07	0.863901	6.33687e+06	2.68361e+07	4.23492
Q70FJ1	AKAP9	Akap9	A-kinase anchor protein 9 (AKAP-9) (Protein kinase A-anchoring protein 9) (PRKA9)	678411	3.454e+06	5.09131	506221	2.12436e+06	4.19651
B2RUJ5	APBA1	Apba1	Amyloid-beta A4 precursor protein-binding family A member 1 (Adapter protein X11alpha) (Neuron-specific X11 protein) (Neuronal Munc18-1-interacting protein 1) (Mint-1)	1.50432e+07	4.32873e+07	2.87753	8.35241e+06	3.50299e+07	4.19399
Q8BXC6	COMD2	Commd2	COMM domain-containing protein 2	3.18925e+07	1.37317e+07	0.430562	1.01922e+07	4.26848e+07	4.188
Q8R4N0	CLYBL	Clybl	Citramalyl-CoA lyase, mitochondrial (EC 4.1.3.25) ((3S)-malyl-CoA thioesterase) (EC 3.1.2.30) (Beta-methylmalate synthase) (EC 2.3.3.-) (Citrate lyase subunit beta-like protein, mitochondrial) (Citrate lyase beta-like) (Malate synthase) (EC 2.3.3.9)	1.59494e+08	8.64487e+07	0.54202	1.79858e+07	7.36211e+07	4.09329
Q5F2E7	NUFP2	Nufip2	Nuclear fragile X mental retardation-interacting protein 2 (82 kDa FMRP-interacting protein) (82-FIP) (FMRP-interacting protein 2)	14222207	678411	0.0477008	3.371e+06	1.34636e+07	3.99394
Q78ZA7	NP1L4	Nap1l4	Nucleosome assembly protein 1-like 4	3.30975e+08	3.24023e+08	0.978996	4.95927e+07	1.97749e+08	3.98747
A6H8H5	KCNB2	Kcnb2	Potassium voltage-gated channel subfamily B member 2 (Voltage-gated potassium channel subunit Kv2.2)				506221	1.96205e+06	3.87588
P07310	KCRM	Ckm	Creatine kinase M-type (EC 2.7.3.2) (Creatine kinase M chain) (Creatine phosphokinase M-type) (CPK-M) (M-CK)	2.28613e+08	1.88357e+08	0.82391	2.57815e+07	9.95463e+07	3.86115
Q99LW6	YAF2	Yaf2	YY1-associated factor 2	1.78394e+07	1.49286e+07	0.836835	2.95282e+06	1.13626e+07	3.84804
A2A9T0	TBKB1	Tbkbp1	TANK-binding kinase 1-binding protein 1 (TBK1-binding protein 1) (Similar to NAP1 TBK1 adapter)				506221	1.93368e+06	3.81983
Q8BG73	SH3L2	Sh3bgrl2	SH3 domain-binding glutamic acid-rich-like protein 2	1.5522e+08	1.64208e+08	1.05791	2.75378e+07	1.05092e+08	3.81628
Q9CYI4	LUC7L	Luc7l	Putative RNA-binding protein Luc7-like 1	1.53333e+07	8755965	0.571044	9.16346e+06	3.47382e+07	3.79095
Q60809	CNOT7	Cnot7	CCR4-NOT transcription complex subunit 7 (EC 3.1.13.4) (CCR4-associated factor 1) (CAF-1)	3.31465e+07	35782243	1.07952	6.64066e+06	2.50307e+07	3.76931
Q8BPY9	FIGL1	Fignl1	Fidgetin-like protein 1 (EC 3.6.4.-)				506221	1.90651e+06	3.76617
Q9DC23	DJC10	Dnajc10	DnaJ homolog subfamily C member 10 (EC 1.8.4.-) (Endoplasmic reticulum DNA J domain-containing protein 5) (ER-resident protein ERdj5) (ERdj5) (Endoplasmic reticulum DnaJ-PDI fusion protein 1) (J domain-containing protein disulfide isomerase-like protein) (J domain-containing PDI-like protein) (JPDI)	1.29713e+07	8.6855e+06	0.669593	8.94275e+06	3.36718e+07	3.76527
P56213	ALR	Gfer	FAD-linked sulfhydryl oxidase ALR (EC 1.8.3.2) (Augmenter of liver regeneration)	4.58202e+07	5.18473e+07	1.13154	2.34018e+07	8.78826e+07	3.75537
Q9QWY8	ASAP1	Asap1	Arf-GAP with SH3 domain, ANK repeat and PH domain-containing protein 1 (130 kDa phosphatidylinositol 4,5-bisphosphate-dependent ARF1 GTPase-activating protein) (ADP-ribosylation factor-directed GTPase-activating protein 1) (ARF GTPase-activating protein 1) (Development and differentiation-enhancing factor 1) (DEF-1) (Differentiation-enhancing factor 1) (PIP2-dependent ARF1 GAP)	8.16126e+07	6.68704e+07	0.819364	5.10644e+07	1.88605e+08	3.69346
Q80U19	DAAM2	Daam2	Disheveled-associated activator of morphogenesis 2	2.47438e+07	2.83144e+07	1.1443	1.71996e+07	6.30592e+07	3.66632
O88492	PLIN4	Plin4	Perilipin-4 (Adipocyte protein S3-12)	2.90439e+07	2.08644e+07	0.718373	4.53377e+07	1.66016e+08	3.66176
Q60751	IGF1R	Igf1r	Insulin-like growth factor 1 receptor (EC 2.7.10.1) (Insulin-like growth factor I receptor) (IGF-I receptor) (CD antigen CD221) [Cleaved into: Insulin-like growth factor 1 receptor alpha chain; Insulin-like growth factor 1 receptor beta chain]	1.43855e+07	9.37843e+06	0.651936	2.9043e+06	1.05951e+07	3.64808
Q3TY86	AIFM3	Aifm3	Apoptosis-inducing factor 3 (EC 1.-.-.-) (Apoptosis-inducing factor-like protein)	3.79052e+07	3.80056e+07	1.00265	1.15843e+07	4.21676e+07	3.64008
Q9DCB1	HMGN3	Hmgn3	High mobility group nucleosome-binding domain-containing protein 3				506221	1.79966e+06	3.55509
Q64322	NPDC1	Npdc1	Neural proliferation differentiation and control protein 1 (NPDC-1)	1.7502e+07	1.57754e+07	0.901346	2.04498e+07	7.26815e+07	3.55414
E9PZ19	TUTLB	Igsf9b	Protein turtle homolog B (Immunoglobulin superfamily member 9B)	678411	2.38853e+07	35.2077	7.5129e+06	2.63897e+07	3.51258
Q8BRF7	SCFD1	Scfd1	Sec1 family domain-containing protein 1 (Syntaxin-binding protein 1-like 2)	5.88432e+07	5.62603e+07	0.956105	1.58417e+07	5.5308e+07	3.49128
Q9D8C6	MED11	Med11	Mediator of RNA polymerase II transcription subunit 11 (Mediator complex subunit 11)				506221	1.76665e+06	3.48988
Q80X80	C2C2L	C2cd2l	Phospholipid transfer protein C2CD2L (C2 domain-containing protein 2-like) (Transmembrane protein 24)	1.48104e+08	1.46942e+08	0.992152	1.20261e+08	4.18499e+08	3.47994
Q8BLS7	SWAHA	Sowaha	Ankyrin repeat domain-containing protein SOWAHA (Ankyrin repeat domain-containing protein 43) (Protein sosondowah homolog A)	678411	1.82224e+07	26.8604	506221	1.75456e+06	3.466
P52825	CPT2	Cpt2	Carnitine O-palmitoyltransferase 2, mitochondrial (EC 2.3.1.21) (Carnitine palmitoyltransferase II) (CPT II)	3.55104e+07	2.25134e+07	0.633996	1.56131e+07	5.36859e+07	3.4385
E9Q394	AKP13	Akap13	A-kinase anchor protein 13 (AKAP-13) (AKAP-Lbc)				506221	1.72668e+06	3.41093
Q69ZZ6	TMCC1	Tmcc1	Transmembrane and coiled-coil domains protein 1	1.32291e+07	1.49747e+07	1.13195	1.14566e+07	3.8796e+07	3.38633
A2A8L5	PTPRF	Ptprf	Receptor-type tyrosine-protein phosphatase F (EC 3.1.3.48) (Leukocyte common antigen related) (LAR)	7.52772e+06	9115444	1.21092	4.68085e+06	1.56842e+07	3.35071
O08848	RO60	RO60	60 kDa SS-A/Ro ribonucleoprotein (60 kDa Ro protein) (60 kDa ribonucleoprotein Ro) (Ro60) (RoRNP) (TROVE domain family member 2)	5.57507e+07	7.82286e+07	1.40318	3.29013e+07	1.10165e+08	3.34835
Q8BWU8	AT2L1	Etnppl	Ethanolamine-phosphate phospho-lyase (EC 4.2.3.2) (Alanine--glyoxylate aminotransferase 2-like 1)				1.08499e+07	3.59439e+07	3.31284
Q99PG2	OGFR	Ogfr	Opioid growth factor receptor (OGFr) (Zeta-type opioid receptor)	2.08375e+07	2.77139e+07	1.33	5.35692e+06	1.75304e+07	3.27248
P02088	HBB1	Hbb-b1	Hemoglobin subunit beta-1 (Beta-1-globin) (Hemoglobin beta-1 chain) (Hemoglobin beta-major chain)	7.48164e+09	5.9639e+09	0.797138	1.5567e+09	5.058e+09	3.24917
O09106	HDAC1	Hdac1	Histone deacetylase 1 (HD1) (EC 3.5.1.98)	2.48442e+07	678411	0.0273066	8.38915e+06	2.7242e+07	3.24729
Q2PFD7	PSD3	Psd3	PH and SEC7 domain-containing protein 3 (Exchange factor for ADP-ribosylation factor guanine nucleotide factor 6 D) (Exchange factor for ARF6 D) (Pleckstrin homology and SEC7 domain-containing protein 3)	1.19817e+09	9.94178e+08	0.829746	2.6354e+08	8.49101e+08	3.22191
O88444	ADCY1	Adcy1	Adenylate cyclase type 1 (EC 4.6.1.1) (ATP pyrophosphate-lyase 1) (Adenylate cyclase type I) (Adenylyl cyclase 1) (Ca(2+)/calmodulin-activated adenylyl cyclase)	3.1984e+07	3.41431e+07	1.06751	1.97974e+07	6.21486e+07	3.13922
Q69Z99	ZN512	Znf512	Zinc finger protein 512	5.18473e+07	2.61685e+07	0.504724	1.2616e+07	3.95336e+07	3.1336
Q9D853	EFMT2	Eef1akmt2	EEF1A lysine methyltransferase 2 (EC 2.1.1.-) (Methyltransferase-like protein 10) (Protein-lysine N-methyltransferase Mettl10)				4.36182e+06	1.35374e+07	3.10361
Q9WU79	PROD	Prodh	Proline dehydrogenase 1, mitochondrial (EC 1.5.5.2) (Proline oxidase)	1.0207e+08	5.23345e+07	0.512731	2.45183e+07	7.60928e+07	3.10351
Q6AXF6	SIDT1	Sidt1	SID1 transmembrane family member 1	9.40957e+06	7.86041e+06	0.835363	8.84749e+06	2.74215e+07	3.09935
Q8BT60	CPNE3	Cpne3	Copine-3 (Copine III)	678411	1.11221e+07	16.3943	1.18054e+07	3.65779e+07	3.09841
Q80VL1	TDRKH	Tdrkh	Tudor and KH domain-containing protein (Tudor domain-containing protein 2)	6.24266e+07	4.16575e+07	0.667303	6.6599e+06	2.05724e+07	3.089
Q9D666	SUN1	Sun1	SUN domain-containing protein 1 (Protein unc-84 homolog A) (Sad1/unc-84 protein-like 1)	1.07978e+07	4.2339e+06	0.392107	4.2484e+06	1.30967e+07	3.08274
Q9CQQ8	LSM7	Lsm7	U6 snRNA-associated Sm-like protein LSm7	5.92029e+07	4.72909e+07	0.798793	1.23376e+07	3.79896e+07	3.07917
Q9D0I4	STX17	Stx17	Syntaxin-17	2.40896e+07	678411	0.0281619	1.72401e+07	5.2757e+07	3.06013
Q8JZR4	EAA5	Slc1a7	Excitatory amino acid transporter 5 (Solute carrier family 1 member 7)				506221	1.54298e+06	3.04804
Q9QZD8	DIC	Slc25a10	Mitochondrial dicarboxylate carrier (Solute carrier family 25 member 10)	4.93624e+07	2.24436e+08	4.5467	2.16945e+07	6.58314e+07	3.03447
Q9WUK2	IF4H	Eif4h	Eukaryotic translation initiation factor 4H (eIF-4H) (Williams-Beuren syndrome chromosomal region 1 protein homolog)	6.44981e+08	6.04993e+08	0.938002	1.60785e+08	4.87562e+08	3.03238
P35283	RAB12	Rab12	Ras-related protein Rab-12 (Rab-13)	1.45668e+08	1.42716e+08	0.979736	1.02691e+08	3.10313e+08	3.02181
Q3KNM2	MARH5	Marchf5	E3 ubiquitin-protein ligase MARCHF5 (EC 2.3.2.27) (Membrane-associated RING finger protein 5) (Membrane-associated RING-CH protein V) (MARCH-V) (RING-type E3 ubiquitin transferase MARCHF5)	8.3765e+07	2.82494e+07	0.337246	11859981	3.53929e+07	2.98423
Q7SIG6	ASAP2	Asap2	Arf-GAP with SH3 domain, ANK repeat and PH domain-containing protein 2 (Development and differentiation-enhancing factor 2) (Paxillin-associated protein with ARF GAP activity 3) (PAG3) (Pyk2 C-terminus-associated protein) (PAP)	4.45198e+07	4.98984e+07	1.12082	1.59836e+07	4.76941e+07	2.98394
Q5HZI2	C2C4C	C2cd4c	C2 calcium-dependent domain-containing protein 4C (Nuclear-localized factor 3) (Protein FAM148C)	2.33852e+07	1.14507e+07	0.489656	506221	1.50377e+06	2.97058
Q9CQ62	DECR	Decr1	2,4-dienoyl-CoA reductase [(3E)-enoyl-CoA-producing], mitochondrial (EC 1.3.1.124) (2,4-dienoyl-CoA reductase [NADPH]) (4-enoyl-CoA reductase [NADPH])	2.95293e+08	2.51741e+08	0.852512	8.57371e+07	2.54024e+08	2.96283
O88845	AKA10	Akap10	A-kinase anchor protein 10, mitochondrial (AKAP-10) (Dual specificity A kinase-anchoring protein 2) (D-AKAP-2) (Protein kinase A-anchoring protein 10) (PRKA10)	2.96099e+07	2.6655e+07	0.900205	1.35744e+07	4.01152e+07	2.95522
Q8BKI2	TNR6B	Tnrc6b	Trinucleotide repeat-containing gene 6B protein				506221	1.49126e+06	2.94586
Q3U0M1	TPPC9	Trappc9	Trafficking protein particle complex subunit 9 (NIK- and IKBKB-binding protein)	4.72909e+07	5.28261e+07	1.11705	3.73128e+07	1.09475e+08	2.93398
P11531	DMD	Dmd	Dystrophin	1.10421e+08	2.16534e+08	1.96099	2.11e+07	6.16283e+07	2.92078
Q9D8S4	ORN	Rexo2	Oligoribonuclease, mitochondrial (EC 3.1.-.-) (RNA exonuclease 2 homolog) (Small fragment nuclease)	4.56303e+07	4.33351e+07	0.949702	1.93666e+07	5.55043e+07	2.86599
Q80WT5	AFTIN	Aftph	Aftiphilin	1.37596e+07	7.46713e+06	0.542687	506221	1.43797e+06	2.84061
Q91YH5	ATLA3	Atl3	Atlastin-3 (EC 3.6.5.-)	5.99632e+07	5.86521e+07	0.978135	5.72531e+07	1.61187e+08	2.81534
Q91VK4	ITM2C	Itm2c	Integral membrane protein 2C (Transmembrane protein BRI3) [Cleaved into: CT-BRI3]	1.19321e+08	1.23783e+08	1.03739	4.06676e+07	1.13858e+08	2.79973
Q8VCA8	SCRN2	Scrn2	Secernin-2	3.50601e+07	3.04227e+07	0.867729	3.16318e+07	8.6837e+07	2.74525
Q9DCB4	ARP21	Arpp21	cAMP-regulated phosphoprotein 21 (ARPP-21) (Regulator of calmodulin signaling) (Thymocyte cAMP-regulated phosphoprotein)				5.2055e+06	1.42338e+07	2.73437
Q9D832	DNJB4	Dnajb4	DnaJ homolog subfamily B member 4	5.34984e+07	7.31981e+07	1.36823	5.49231e+07	1.49364e+08	2.71951
P10637	TAU	Mapt	Microtubule-associated protein tau (Neurofibrillary tangle protein) (Paired helical filament-tau) (PHF-tau)	3.68213e+09	3.18317e+09	0.864492	2.09724e+09	5.65906e+09	2.69834
A2A5R2	BIG2	Arfgef2	Brefeldin A-inhibited guanine nucleotide-exchange protein 2 (Brefeldin A-inhibited GEP 2) (ADP-ribosylation factor guanine nucleotide-exchange factor 2)	4.44339e+07	4.12116e+07	0.927482	3.33594e+07	8.91565e+07	2.6726
Q99KS6	ADPRM	Adprm	Manganese-dependent ADP-ribose/CDP-alcohol diphosphatase (EC 3.6.1.13) (EC 3.6.1.16) (EC 3.6.1.53) (ADPRibase-Mn) (CDP-choline phosphohydrolase)	678411	2.78242e+07	41.0138	506221	1.35142e+06	2.66962
Q922V4	PLRG1	Plrg1	Pleiotropic regulator 1	1.09385e+07	678411	0.0620202	5.11768e+06	1.36602e+07	2.66921
Q3THW5	H2AV	H2az2	Histone H2A.V (H2A.F/Z) (H2A.Z variant histone 2)	4.34577e+07	1.97639e+08	4.54785	3.71546e+08	9.85961e+08	2.65368
P49070	CAMLG	Camlg	Guided entry of tail-anchored proteins factor CAMLG (Calcium signal-modulating cyclophilin ligand)	1.98139e+07	1.57228e+07	0.793522	8.14355e+06	2.1573e+07	2.64909
P21981	TGM2	Tgm2	Protein-glutamine gamma-glutamyltransferase 2 (EC 2.3.2.13) (Isopeptidase TGM2) (EC 3.4.-.-) (Protein-glutamine deamidase TGM2) (EC 3.5.1.44) (Protein-glutamine dopaminyltransferase TGM2) (EC 2.3.1.-) (Protein-glutamine histaminyltransferase TGM2) (EC 2.3.1.-) (Protein-glutamine noradrenalinyltransferase TGM2) (EC 2.3.1.-) (Protein-glutamine serotonyltransferase TGM2) (EC 2.3.1.-) (Tissue transgl…	1.61849e+07	7.06027e+07	4.36226	6.20772e+07	1.63635e+08	2.63598
Q6PD10	IP6K1	Ip6k1	Inositol hexakisphosphate kinase 1 (InsP6 kinase 1) (EC 2.7.4.21) (Inositol hexaphosphate kinase 1)				4.4763e+06	1.17487e+07	2.62465
P11862	GAS2	Gas2	Growth arrest-specific protein 2 (GAS-2)				506221	1.32806e+06	2.62349
Q9ET01	PYGL	Pygl	Glycogen phosphorylase, liver form (EC 2.4.1.1)	8.28836e+06	4.16863e+08	50.295	1.65273e+07	4.31367e+07	2.61003
P21836	ACES	Ache	Acetylcholinesterase (AChE) (EC 3.1.1.7)	1.60334e+07	1.46684e+07	0.914862	1.46482e+07	3.79175e+07	2.58855
Q8VEH5	EPMIP	Epm2aip1	EPM2A-interacting protein 1 (Laforin-interacting protein)	1.36728e+08	1.12716e+08	0.82438	9.76554e+07	2.52016e+08	2.58067
P06797	CATL1	Ctsl	Procathepsin L (EC 3.4.22.15) (Cathepsin L1) (Major excreted protein) (MEP) (p39 cysteine proteinase) [Cleaved into: Cathepsin L; Cathepsin L heavy chain; Cathepsin L light chain]	5.8015e+07	6.24681e+07	1.07676	1.34816e+07	3.4273e+07	2.5422
Q8BG40	KTNB1	Katnb1	Katanin p80 WD40 repeat-containing subunit B1 (Katanin p80 subunit B1) (p80 katanin)	2.51475e+07	2.557e+07	1.0168	1.56005e+07	3.94229e+07	2.52702
Q9D1H7	GET4	Get4	Golgi to ER traffic protein 4 homolog	6.20582e+07	5.94641e+07	0.958199	1.78857e+07	4.51686e+07	2.5254
Q99JB8	PACN3	Pacsin3	Protein kinase C and casein kinase II substrate protein 3	3.24497e+07	3.0336e+07	0.934864	1.37618e+07	3.47456e+07	2.52479
Q921C1	CXG3	Gjc3	Gap junction gamma-3 protein (Connexin-29) (Cx29) (Gap junction epsilon-1 protein)	2.59786e+07	4.50824e+07	1.73536	1.6743e+07	4.22684e+07	2.52453
Q9DB75	CDIP1	Cdip1	Cell death-inducing p53-target protein 1 (LITAF-like protein)	7.67883e+07	1.11007e+08	1.44563	2.68361e+07	6.76432e+07	2.5206
Q6P6M7	SPCS	Sepsecs	O-phosphoseryl-tRNA(Sec) selenium transferase (EC 2.9.1.2) (Selenocysteine synthase) (Sec synthase) (Selenocysteinyl-tRNA(Sec) synthase) (Sep-tRNA:Sec-tRNA synthase) (SepSecS) (UGA suppressor tRNA-associated protein)	3.76803e+09	3.36042e+09	0.891825	1.097e+09	2.76305e+09	2.51872
P10833	RRAS	Rras	Ras-related protein R-Ras (EC 3.6.5.-) (p23)	3.97249e+07	4.04253e+07	1.01763	2.14941e+07	5.3443e+07	2.48641
Q80XR2	AT2C1	Atp2c1	Calcium-transporting ATPase type 2C member 1 (ATPase 2C1) (EC 7.2.2.10) (ATP-dependent Ca(2+) pump PMR1) (Ca(2+)/Mn(2+)-ATPase 2C1) (Secretory pathway Ca(2+)-transporting ATPase type 1) (SPCA1)	4.75404e+07	4.75613e+07	1.00044	1.19898e+07	2.97905e+07	2.48465
Q8BYP3	RHOF	Rhof	Rho-related GTP-binding protein RhoF	678411	20054936	29.5616	4884891	1.21226e+07	2.48166
Q9R112	SQOR	Sqor	Sulfide:quinone oxidoreductase, mitochondrial (SQOR) (EC 1.8.5.8) (Sulfide quinone oxidoreductase)	3.65304e+07	3.70513e+07	1.01426	1.30771e+07	3.23553e+07	2.47419
P97478	COQ7	Coq7	5-demethoxyubiquinone hydroxylase, mitochondrial (DMQ hydroxylase) (EC 1.14.99.60) (Timing protein clk-1 homolog) (Ubiquinone biosynthesis monooxygenase COQ7)	6.88769e+07	8.79045e+07	1.27625	1.55654e+07	3.83346e+07	2.4628
Q9Z1T1	AP3B1	Ap3b1	AP-3 complex subunit beta-1 (Adaptor protein complex AP-3 subunit beta-1) (Adaptor-related protein complex 3 subunit beta-1) (Beta-3A-adaptin) (Clathrin assembly protein complex 3 beta-1 large chain)	1.8147e+07	2.09753e+07	1.15585	8.35598e+06	2.05455e+07	2.45878
Q8VCV1	AB17C	Abhd17c	Alpha/beta hydrolase domain-containing protein 17C (Abhydrolase domain-containing protein 17C) (EC 3.1.2.22)				1.30004e+07	3.18726e+07	2.45166
Q6RHR9	MAGI1	Magi1	Membrane-associated guanylate kinase, WW and PDZ domain-containing protein 1 (BAI1-associated protein 1) (BAP-1) (Membrane-associated guanylate kinase inverted 1) (MAGI-1)	2.73635e+07	2.76397e+07	1.01009	1.29341e+07	3.15883e+07	2.44225
Q9CQU5	ZWINT	Zwint	ZW10 interactor (ZW10-interacting protein 1) (Zwint-1)	1.91228e+07	1.72526e+07	0.902201	1.38784e+07	3.38861e+07	2.44164
Q9Z0S6	CLD10	Cldn10	Claudin-10	8.76015e+06	678411	0.0774428	8.99383e+06	2.19022e+07	2.43525
O54962	BAF	Banf1	Barrier-to-autointegration factor (Breakpoint cluster region protein 1) (LAP2-binding protein 1) [Cleaved into: Barrier-to-autointegration factor, N-terminally processed]	5.72761e+08	5.43073e+08	0.948167	3.15832e+08	7.62811e+08	2.41524
Q70IV5	SYNEM	Synm	Synemin (Desmuslin)	4.57026e+06	9.81336e+06	2.14722	4.5339e+06	1.08609e+07	2.39549
O35874	SATT	Slc1a4	Neutral amino acid transporter A (Alanine/serine/cysteine/threonine transporter 1) (ASCT-1) (SATT) (Solute carrier family 1 member 4)	3.26669e+08	4.28663e+08	1.31223	1.33376e+08	3.18937e+08	2.39127
Q8BTV2	CPSF7	Cpsf7	Cleavage and polyadenylation specificity factor subunit 7	8.38867e+08	2.4814e+07	0.0295803	1.73309e+07	4.13062e+07	2.38339
Q6A009	LTN1	Ltn1	E3 ubiquitin-protein ligase listerin (EC 2.3.2.27) (RING finger protein 160) (RING-type E3 ubiquitin transferase listerin) (Zinc finger protein 294) (Zfp-294)	2.18895e+06	4.88402e+06	2.23122	5.55402e+06	1.31119e+07	2.3608
Q9D415	DLGP1	Dlgap1	Disks large-associated protein 1 (DAP-1) (Guanylate kinase-associated protein) (PSD-95/SAP90-binding protein 1) (SAP90/PSD-95-associated protein 1) (SAPAP1)	2.65357e+08	1.63359e+08	0.615619	4.53875e+07	1.07108e+08	2.35985
Q9D2M8	UB2V2	Ube2v2	Ubiquitin-conjugating enzyme E2 variant 2 (Ubc-like protein MMS2)	1.2196e+08	2.40241e+06	0.0196983	6.10468e+07	1.42423e+08	2.33302
Q91WT9	CBS	Cbs	Cystathionine beta-synthase (EC 4.2.1.22) (Beta-thionase) (Serine sulfhydrase)	7.05823e+07	8.19771e+07	1.16144	3.9908e+07	9.26469e+07	2.32151
Q8VCM7	FIBG	Fgg	Fibrinogen gamma chain	3.42681e+07	3.84938e+06	0.112331	9.84715e+06	2.28486e+07	2.32033
P46414	CDN1B	Cdkn1b	Cyclin-dependent kinase inhibitor 1B (Cyclin-dependent kinase inhibitor p27) (p27Kip1)	8755965	3.02254e+07	3.45198	9.6089e+06	2.22361e+07	2.31412
Q8BQ47	CNPY4	Cnpy4	Protein canopy homolog 4 (Protein associated with Tlr4)				3.54814e+06	8.18518e+06	2.30689
Q8VDZ4	ZDHC5	Zdhhc5	Palmitoyltransferase ZDHHC5 (EC 2.3.1.225) (Zinc finger DHHC domain-containing protein 5) (DHHC-5)	3.64334e+07	3.34126e+07	0.917086	1.23582e+07	2.83366e+07	2.29293
Q9CWZ3	RBM8A	Rbm8a	RNA-binding protein 8A (RNA-binding motif protein 8A) (Ribonucleoprotein RBM8A)	7.33263e+07	3.48848e+07	0.475748	3.22903e+07	7.33765e+07	2.2724
P53612	PGTB2	Rabggtb	Geranylgeranyl transferase type-2 subunit beta (EC 2.5.1.60) (Geranylgeranyl transferase type II subunit beta) (GGTase-II-beta) (Rab geranyl-geranyltransferase subunit beta) (Rab GG transferase beta) (Rab GGTase beta) (Rab geranylgeranyltransferase subunit beta) (Type II protein geranyl-geranyltransferase subunit beta)	9.55347e+07	9.02624e+07	0.944813	3.78345e+07	8.54384e+07	2.25822
D3YXK2	SAFB1	Safb	Scaffold attachment factor B1 (SAF-B1)	2.53568e+07	1.7437e+07	0.687666	4.26848e+07	9.63816e+07	2.25798
P70207	PLXA2	Plxna2	Plexin-A2 (Plex 2) (Plexin-2)	3.02109e+07	2.73355e+07	0.90482	1.21345e+07	2.73548e+07	2.25431
Q80U28	MADD	Madd	MAP kinase-activating death domain protein (Rab3 GDP/GTP exchange factor) (RabGEF) (Rab3 GDP/GTP exchange protein) (Rab3GEP)	7.15705e+07	7.22575e+07	1.0096	6.49287e+07	1.45863e+08	2.24651
Q91XF0	PNPO	Pnpo	Pyridoxine-5'-phosphate oxidase (EC 1.4.3.5) (Pyridoxamine-phosphate oxidase)	7.87405e+07	1.24142e+08	1.57659	3.35578e+07	7.52217e+07	2.24156
Q9D952	EVPL	Evpl	Envoplakin (210 kDa cornified envelope precursor protein) (p210)	1.14414e+07	678411	0.0592941	1.87351e+07	4.19866e+07	2.24107
P61255	RL26	Rpl26	60S ribosomal protein L26 (Silica-induced gene 20 protein) (SIG-20)	2.72371e+08	2.34545e+08	0.861124	8.67692e+07	1.94326e+08	2.23957
Q7M759	AB17B	Abhd17b	Alpha/beta hydrolase domain-containing protein 17B (Abhydrolase domain-containing protein 17B) (EC 3.1.2.22)	7.0662e+07	8.18183e+07	1.15788	1.29674e+07	2.90228e+07	2.23814
Q9ESE1	LRBA	Lrba	Lipopolysaccharide-responsive and beige-like anchor protein (Beige-like protein)	1.45324e+07	8.82363e+06	0.607168	4.03901e+06	9.03054e+06	2.23583
Q99M51	NCK1	Nck1	Cytoplasmic protein NCK1 (NCK adaptor protein 1) (Nck-1)	2.15831e+07	2.55884e+07	1.18557	1.0381e+07	2.31561e+07	2.23062
Q148V7	RELCH	Relch	RAB11-binding protein RELCH (LisH domain and HEAT repeat-containing protein KIAA1468) (RAB11-binding protein containing LisH, coiled-coil, and HEAT repeats)	6.98796e+07	1.78811e+08	2.55884	5.82944e+07	1.29489e+08	2.22129
Q61493	REV3L	Rev3l	DNA polymerase zeta catalytic subunit (EC 2.7.7.7) (Protein reversionless 3-like) (REV3-like) (Seizure-related protein 4)	7.51614e+07	8.59858e+07	1.14401	3.72531e+07	8.24157e+07	2.21232
Q3TMP8	TM38A	Tmem38a	Trimeric intracellular cation channel type A (TRIC-A) (TRICA) (27 kDa sarcoplasmic reticulum protein) (Mitsugumin-33A) (SPR-27) (Transmembrane protein 38A)	1.71119e+07	2.92943e+07	1.71193	9.22501e+06	2.0401e+07	2.21149
Q9D1P4	CHRD1	Chordc1	Cysteine and histidine-rich domain-containing protein 1 (CHORD domain-containing protein 1) (CHORD-containing protein 1) (Chp-1) (Protein morgana)	2.3248e+08	2.88546e+08	1.24117	1.73094e+08	3.78467e+08	2.18649
Q8BMJ3	IF1AX	Eif1ax	Eukaryotic translation initiation factor 1A, X-chromosomal (eIF-1A X isoform) (Eukaryotic translation initiation factor 4C) (eIF-4C)	678411	5.16633e+07	76.1533	3.83775e+07	8.38934e+07	2.186
Q9R118	HTRA1	Htra1	Serine protease HTRA1 (EC 3.4.21.-) (High-temperature requirement A serine peptidase 1) (Serine protease 11)	4.10793e+07	5.35343e+07	1.30319	6.85592e+07	1.49775e+08	2.1846
Q8R4C2	RUFY2	Rufy2	RUN and FYVE domain-containing protein 2 (Leucine zipper FYVE-finger protein) (LZ-FYVE)				5.7369e+06	1.2441e+07	2.16859
Q8VCF0	MAVS	Mavs	Mitochondrial antiviral-signaling protein (MAVS) (CARD adapter inducing interferon beta) (Cardif) (Interferon beta promoter stimulator protein 1) (IPS-1) (Virus-induced-signaling adapter) (VISA)	2.34246e+07	678411	0.0289614	1.1828e+07	2.55069e+07	2.15649
Q8K406	LGI3	Lgi3	Leucine-rich repeat LGI family member 3 (Leubrin) (Leucine-rich glioma-inactivated protein 3)	5.21269e+07	6.16804e+07	1.18327	3.26572e+07	7.03468e+07	2.1541
O70622	RTN2	Rtn2	Reticulon-2 (Neuroendocrine-specific protein-like 1) (NSP-like protein 1) (Neuroendocrine-specific protein-like I) (NSP-like protein I) (NSPLI)				1.20975e+07	2.60533e+07	2.15362
P70302	STIM1	Stim1	Stromal interaction molecule 1	7.34599e+07	7.42279e+07	1.01045	6.46194e+07	1.38916e+08	2.14976
Q8BH82	NAPEP	Napepld	N-acyl-phosphatidylethanolamine-hydrolyzing phospholipase D (N-acyl phosphatidylethanolamine phospholipase D) (NAPE-PLD) (NAPE-hydrolyzing phospholipase D) (EC 3.1.4.54)	2.14421e+07	3.78536e+07	1.76539	9.80368e+06	2.10373e+07	2.14585
Q9QUN9	DKK3	Dkk3	Dickkopf-related protein 3 (Dickkopf-3) (Dkk-3) (mDkk-3)	3.71469e+07	2.93217e+07	0.789346	1.47944e+07	3.1731e+07	2.1448
P58059	RT21	Mrps21	28S ribosomal protein S21, mitochondrial (MRP-S21) (S21mt)	3.13402e+07	2.62714e+07	0.838267	1.27752e+07	2.73396e+07	2.14005
Q9WVG6	CARM1	Carm1	Histone-arginine methyltransferase CARM1 (EC 2.1.1.319) (Coactivator-associated arginine methyltransferase 1) (Protein arginine N-methyltransferase 4)	60968963	4.85781e+07	0.796768	2.54385e+07	5.43994e+07	2.13847
P47746	CNR1	Cnr1	Cannabinoid receptor 1 (CB-R) (CB1) (Brain-type cannabinoid receptor)	2.38849e+08	2.4595e+08	1.02973	1.44274e+08	3.06988e+08	2.12781
Q9R0P4	SMAP	Smap	Small acidic protein (Sid 2057)	5.73396e+07	5.34454e+07	0.932085	5.45702e+07	1.16042e+08	2.12648
P56212	ARP19	Arpp19	cAMP-regulated phosphoprotein 19 (ARPP-19)	1.10068e+08	678411	0.00616358	9.74692e+07	2.0404e+08	2.09338
P35290	RAB24	Rab24	Ras-related protein Rab-24 (Rab-16)	4.1772e+07	2.87368e+07	0.687943	2.25184e+07	4.67788e+07	2.07736
Q6PA06	ATLA2	Atl2	Atlastin-2 (EC 3.6.5.-) (ADP-ribosylation factor-like protein 6-interacting protein 2) (ARL-6-interacting protein 2) (Aip-2)	7.07028e+07	6.53485e+07	0.92427	2.07867e+07	4.31509e+07	2.07589
Q8K3F6	KCNQ3	Kcnq3	Potassium voltage-gated channel subfamily KQT member 3 (KQT-like 3) (Potassium channel subunit alpha KvLQT3) (Voltage-gated potassium channel subunit Kv7.3)	1.47867e+07	7.17444e+06	0.485197	6.70319e+06	1.38784e+07	2.07042
Q9Z0F7	SYUG	Sncg	Gamma-synuclein (Persyn)	2.70111e+07	3.81745e+07	1.41329	4.13062e+07	8.46301e+07	2.04885
Q60766	IRGM1	Irgm1	Immunity-related GTPase family M protein 1 (EC 3.6.5.-) (Interferon-inducible GTPase 3) (Interferon-inducible protein 1) (LPS-stimulated RAW 264.7 macrophage protein 47) (LRG-47)	1.91783e+07	4.00847e+07	2.09011	1.05116e+07	2.14941e+07	2.0448
Q9CYL5	GAPR1	Glipr2	Golgi-associated plant pathogenesis-related protein 1 (GAPR-1) (Golgi-associated PR-1 protein) (Glioma pathogenesis-related protein 2) (GliPR 2)	678411	1.35273e+07	19.9396	5.3488e+06	1.08881e+07	2.03562
Q91WU5	AS3MT	As3mt	Arsenite methyltransferase (EC 2.1.1.137) (Methylarsonite methyltransferase) (S-adenosyl-L-methionine:arsenic(III) methyltransferase)	2.91204e+07	1.82039e+07	0.625126	1.62572e+07	3.29769e+07	2.02844
Q9CQ48	NUDC2	Nudcd2	NudC domain-containing protein 2	5.07614e+07	4.994e+07	0.983819	1.04026e+07	2.09836e+07	2.01715
O70250	PGAM2	Pgam2	Phosphoglycerate mutase 2 (EC 5.4.2.11) (EC 5.4.2.4) (BPG-dependent PGAM 2) (Muscle-specific phosphoglycerate mutase) (Phosphoglycerate mutase isozyme M) (PGAM-M)	7.48978e+07	8.16126e+07	1.08965	3.86612e+07	7.76749e+07	2.00912
Q9JHK4	PGTA	Rabggta	Geranylgeranyl transferase type-2 subunit alpha (EC 2.5.1.60) (Geranylgeranyl transferase type II subunit alpha) (Rab geranyl-geranyltransferase subunit alpha) (Rab GG transferase alpha) (Rab GGTase alpha) (Rab geranylgeranyltransferase subunit alpha)	1.21381e+08	1.86284e+08	1.53471	9.02483e+07	1.8117e+08	2.00746
Q91WA3	HDA11	Hdac11	Histone deacetylase 11 (HD11) (EC 3.5.1.98)	8.02844e+06	3.69414e+07	4.60131	2.71784e+07	5.44676e+07	2.00408
P97950	RB33A	Rab33a	Ras-related protein Rab-33A (Small GTP-binding protein S10)	3.08638e+07	3.41087e+07	1.10514	1.31929e+07	2.63566e+07	1.99778
Q9CRB6	TPPP3	Tppp3	Tubulin polymerization-promoting protein family member 3	2.87479e+08	3.89543e+08	1.35503	2.31133e+08	4.61031e+08	1.99466
Q8VEJ9	VPS4A	Vps4a	Vacuolar protein sorting-associated protein 4A (EC 3.6.4.6)	6.82517e+07	8.70708e+07	1.27573	2.27574e+07	4.5291e+07	1.99017
Q08642	PADI2	Padi2	Protein-arginine deiminase type-2 (EC 3.5.3.15) (Peptidylarginine deiminase II) (Protein-arginine deiminase type II)	1.37165e+08	1.57165e+08	1.14581	1.12676e+08	2.24151e+08	1.98934
Q9CPW2	FDX2	Fdx2	Ferredoxin-2, mitochondrial (Adrenodoxin-like protein) (Ferredoxin-1-like protein)	3.78536e+07	3.45556e+07	0.912875	1.35366e+07	2.69202e+07	1.9887
Q99KR7	PPIF	Ppif	Peptidyl-prolyl cis-trans isomerase F, mitochondrial (PPIase F) (EC 5.2.1.8) (Cyclophilin D) (CyP-D) (CypD) (Cyclophilin F) (Rotamase F)	1.03528e+08	1.36111e+08	1.31473	7.60372e+07	1.50929e+08	1.98494
P58390	KCNN2	Kcnn2	Small conductance calcium-activated potassium channel protein 2 (SK2) (SKCa 2) (SKCa2) (KCa2.2)	678411	1.81861e+07	26.8069	7.61717e+06	1.50956e+07	1.98179
P40237	CD82	Cd82	CD82 antigen (C33 antigen) (IA4) (Inducible membrane protein R2) (Metastasis suppressor Kangai-1 homolog) (CD antigen CD82)	6.46093e+08	6.52975e+08	1.01065	4.08631e+08	8.09193e+08	1.98026
Q91XD7	CREL1	Creld1	Protein disulfide isomerase Creld1 (EC 5.3.4.1) (Cysteine-rich with EGF-like domain protein 1)	7.02551e+07	6.89552e+07	0.981497	2.63369e+07	5.21047e+07	1.97839
Q8R127	SCPDL	Sccpdh	Saccharopine dehydrogenase-like oxidoreductase (EC 1.-.-.-)	1.16167e+08	1.79521e+08	1.54537	6.55294e+07	1.29591e+08	1.9776
Q14BB9	MA6D1	Map6d1	MAP6 domain-containing protein 1 (21 kDa STOP-like protein) (SL21)	1.85163e+08	3.38235e+07	0.182669	8.94459e+07	1.76305e+08	1.97108
Q8CI75	DI3L2	Dis3l2	DIS3-like exonuclease 2 (EC 3.1.13.-)	2.20653e+07	2.5714e+07	1.16536	2.49436e+07	4.91394e+07	1.97002
Q9CZG3	COMD8	Commd8	COMM domain-containing protein 8	4.36848e+07	3.91238e+07	0.895593	1.94342e+07	3.82403e+07	1.96768
Q60967	PAPS1	Papss1	Bifunctional 3'-phosphoadenosine 5'-phosphosulfate synthase 1 (PAPS synthase 1) (PAPSS 1) (Sulfurylase kinase 1) (SK 1) (SK1) [Includes: Sulfate adenylyltransferase (EC 2.7.7.4) (ATP-sulfurylase) (Sulfate adenylate transferase) (SAT); Adenylyl-sulfate kinase (EC 2.7.1.25) (3'-phosphoadenosine-5'-phosphosulfate synthase) (APS kinase) (Adenosine-5'-phosphosulfate 3'-phosphotransferase) (Adenylylsul…	4.95834e+07	1.68222e+07	0.339272	7.87282e+06	1.54419e+07	1.96141
Q8VDN4	CCD92	Ccdc92	Coiled-coil domain-containing protein 92	3.2959e+07	3.16861e+07	0.961377	1.17487e+07	2.30082e+07	1.95836
P35762	CD81	Cd81	CD81 antigen (26 kDa cell surface protein TAPA-1) (Target of the antiproliferative antibody 1) (CD antigen CD81)	2.63071e+09	2.63822e+09	1.00285	1.01493e+09	1.98571e+09	1.95649
Q9CQT1	MTNA	Mri1	Methylthioribose-1-phosphate isomerase (M1Pi) (MTR-1-P isomerase) (EC 5.3.1.23) (S-methyl-5-thioribose-1-phosphate isomerase) (Translation initiation factor eIF-2B subunit alpha/beta/delta-like protein)	2.2403e+07	678411	0.0302821	3.41277e+07	6.67422e+07	1.95566
P41242	MATK	Matk	Megakaryocyte-associated tyrosine-protein kinase (EC 2.7.10.2) (Protein kinase NTK) (Tyrosine-protein kinase CTK)	3.11702e+07	1.43774e+07	0.461254	1.64191e+07	3.207e+07	1.95321
Q3U2V3	NUD18	Nudt18	8-oxo-dGDP phosphatase NUDT18 (EC 3.6.1.58) (2-hydroxy-dADP phosphatase) (7,8-dihydro-8-oxoguanine phosphatase) (MutT homolog 3) (Nucleoside diphosphate-linked moiety X motif 18) (Nudix motif 18)	1.21021e+07	1.05067e+07	0.868173	1.44066e+07	2.81115e+07	1.9513
Q04207	TF65	Rela	Transcription factor p65 (Nuclear factor NF-kappa-B p65 subunit) (Nuclear factor of kappa light polypeptide gene enhancer in B-cells 3)	1.65532e+07	1.66712e+07	1.00713	8.18518e+06	1.58663e+07	1.93842
O08915	AIP	Aip	AH receptor-interacting protein (AIP) (Aryl-hydrocarbon receptor-interacting protein)	9.22438e+07	1.10467e+08	1.19756	5.37706e+07	1.0421e+08	1.93805
P52623	UCK1	Uck1	Uridine-cytidine kinase 1 (UCK 1) (EC 2.7.1.48) (Cytidine monophosphokinase 1) (Uridine monophosphokinase 1)				2.12623e+07	4.09588e+07	1.92636
Q99JT9	MTND	Adi1	1,2-dihydroxy-3-keto-5-methylthiopentene dioxygenase (EC 1.13.11.54) (Acireductone dioxygenase (Fe(2+)-requiring)) (ARD) (Fe-ARD) (Membrane-type 1 matrix metalloproteinase cytoplasmic tail-binding protein 1) (MTCBP-1)				1.27535e+07	2.45567e+07	1.92549
Q7TN79	AKA7G	Akap7	A-kinase anchor protein 7 isoform gamma (AKAP-7 isoform gamma) (A-kinase anchor protein 18) (AKAP-18) (Protein kinase A-anchoring protein 7 isoform gamma) (PRKA7 isoform gamma)	1.11007e+08	8.60219e+07	0.774921	6.77318e+07	1.29953e+08	1.91865
Q0GNC1	INF2	Inf2	Inverted formin-2	4.1882e+07	3.20468e+07	0.76517	2.54692e+07	4.87104e+07	1.91252
Q7TNV0	DEK	Dek	Protein DEK	7.4916e+07	6.57918e+07	0.878207	4.06237e+07	7.7452e+07	1.90657
P56546	CTBP2	Ctbp2	C-terminal-binding protein 2 (CtBP2)	5.75845e+07	5.90319e+07	1.02514	2.85867e+07	5.44953e+07	1.90631
P84309	ADCY5	Adcy5	Adenylate cyclase type 5 (EC 4.6.1.1) (ATP pyrophosphate-lyase 5) (Adenylate cyclase type V) (Adenylyl cyclase 5)	1.17583e+07	1.21247e+07	1.03116	1.74169e+07	3.31775e+07	1.90491
D3YZP9	CCDC6	Ccdc6	Coiled-coil domain-containing protein 6	5.83927e+07	4.53163e+07	0.77606	3.04904e+07	5.80351e+07	1.90339
P54763	EPHB2	Ephb2	Ephrin type-B receptor 2 (EC 2.7.10.1) (Neural kinase) (Nuk receptor tyrosine kinase) (Tyrosine-protein kinase receptor EPH-3) (Tyrosine-protein kinase receptor SEK-3) [Cleaved into: EphB2/CTF1; EphB2/CTF2]	4.26344e+07	4.69397e+07	1.10098	1.82934e+07	3.4816e+07	1.90321
Q8C863	ITCH	Itch	E3 ubiquitin-protein ligase Itchy (EC 2.3.2.26) (HECT-type E3 ubiquitin transferase Itchy homolog)	1.33743e+07	2.30981e+07	1.72705	7.43024e+06	1.41294e+07	1.9016
Q6NZB0	DNJC8	Dnajc8	DnaJ homolog subfamily C member 8	3.62879e+07	3.85435e+07	1.06216	3.4816e+07	6.61712e+07	1.9006
Q9CX30	YIF1B	Yif1b	Protein YIF1B (YIP1-interacting factor homolog B)	678411	3.77602e+07	55.6597	2.35554e+07	4.46812e+07	1.89686
Q8R502	LRC8C	Lrrc8c	Volume-regulated anion channel subunit LRRC8C (Factor for adipocyte differentiation 158) (Leucine-rich repeat-containing protein 8C)	1.89313e+07	1.89464e+07	1.0008	1.74317e+07	3.29013e+07	1.88745
P39447	ZO1	Tjp1	Tight junction protein ZO-1 (Tight junction protein 1) (Zona occludens protein 1) (Zonula occludens protein 1)	7.42895e+07	6.73423e+07	0.906485	5.8458e+07	1.10137e+08	1.88404
Q9CR00	PSMD9	Psmd9	26S proteasome non-ATPase regulatory subunit 9 (26S proteasome regulatory subunit p27)	9.90803e+07	1.12196e+08	1.13237	5.49361e+07	1.03236e+08	1.87919
Q8BGS2	BOLA2	Bola2	BolA-like protein 2	119908762	5.33518e+07	0.444936	4.95666e+07	9.31339e+07	1.87896
P61793	LPAR1	Lpar1	Lysophosphatidic acid receptor 1 (LPA receptor 1) (LPA-1) (Lysophosphatidic acid receptor Edg-2) (Rec1.3) (VZG-1)	678411	2.75139e+07	40.5565	9973941	1.87351e+07	1.8784
Q9QXT0	CNPY2	Cnpy2	Protein canopy homolog 2 (MIR-interacting saposin-like protein) (Putative secreted protein ZSIG9) (Transmembrane protein 4)	5.0523e+07	5.03057e+07	0.995699	3.78833e+07	7.10601e+07	1.87576
P98086	C1QA	C1qa	Complement C1q subcomponent subunit A	1.57362e+08	2.47933e+08	1.57556	9.26469e+07	1.73713e+08	1.875
Q3TVA9	CC136	Ccdc136	Coiled-coil domain-containing protein 136	3.3966e+07	1.77738e+07	0.523281	2.8721e+07	5.37706e+07	1.87217
Q9CX34	SGT1	Sugt1	Protein SGT1 homolog (Suppressor of G2 allele of SKP1 homolog)	3.05192e+08	3.05852e+08	1.00216	1.9087e+08	3.57268e+08	1.87179
O08992	SDCB1	Sdcbp	Syntenin-1 (Scaffold protein Pbp1) (Syndecan-binding protein 1)	1.19604e+08	9.33152e+07	0.780204	5.12834e+07	9.54365e+07	1.86096
Q61838	PZP	Pzp	Pregnancy zone protein (Alpha-2-macroglobulin) (Alpha-2-M) [Cleaved into: Alpha-2-macroglobulin 165 kDa subunit; Alpha-2-macroglobulin 35 kDa subunit]	5.22863e+07	678411	0.0129749	9.8828e+06	1.8357e+07	1.85747
Q9ES34	UBE3B	Ube3b	Ubiquitin-protein ligase E3B (EC 2.3.2.26) (HECT-type ubiquitin transferase E3B)	1.52165e+07	678411	0.044584	9.97099e+06	1.8429e+07	1.84826
Q9CQ19	MYL9	Myl9	Myosin regulatory light polypeptide 9 (Myosin regulatory light chain 2, smooth muscle isoform) (Myosin regulatory light chain 9)	2.25997e+08	678411	0.00300186	1.72813e+08	3.18873e+08	1.84519
Q9CZL5	PHS2	Pcbd2	Pterin-4-alpha-carbinolamine dehydratase 2 (PHS 2) (EC 4.2.1.96) (4-alpha-hydroxy-tetrahydropterin dehydratase 2) (DcoH-like protein DCoHm) (Dimerization cofactor of hepatocyte nuclear factor 1 from muscle) (HNF-1-alpha dimerization cofactor)	2.56142e+07	678411	0.0264857	1.73664e+07	3.19035e+07	1.83709
Q8R2K1	FUCM	Fuom	Fucose mutarotase (EC 5.1.3.29)	8.93845e+07	5.50082e+07	0.615411	5.29211e+07	9.66288e+07	1.8259
Q99PI8	RTN4R	Rtn4r	Reticulon-4 receptor (Nogo receptor) (NgR) (Nogo-66 receptor) (Nogo66 receptor-1) (NgR1)	2.50243e+07	2.01965e+07	0.807078	2.60201e+07	4.73773e+07	1.8208
Q6ZPE2	MTMR5	Sbf1	Myotubularin-related protein 5 (Inactive phosphatidylinositol 3-phosphatase 5) (SET-binding factor 1) (Sbf1)	3.31575e+08	2.07926e+08	0.627087	5.87548e+08	1.06592e+09	1.81418
Q9EQZ6	RPGF4	Rapgef4	Rap guanine nucleotide exchange factor 4 (Exchange factor directly activated by cAMP 2) (Exchange protein directly activated by cAMP 2) (EPAC 2) (cAMP-dependent Rap1 guanine-nucleotide exchange factor) (cAMP-regulated guanine nucleotide exchange factor II) (cAMP-GEFII)	1.01564e+08	8.24824e+07	0.812126	6.33424e+07	1.14776e+08	1.81199
E9Q735	UBE4A	Ube4a	Ubiquitin conjugation factor E4 A (EC 2.3.2.-)	4.12738e+07	4.38695e+07	1.06289	3.46637e+07	6.28053e+07	1.81185
Q9WTX2	PRKRA	Prkra	Interferon-inducible double-stranded RNA-dependent protein kinase activator A (PKR-associated protein X) (PKR-associating protein X) (RAX) (Protein activator of the interferon-induced protein kinase) (Protein kinase, interferon-inducible double-stranded RNA-dependent activator)	3.72252e+07	2.37061e+07	0.636828	1.69277e+07	3.04183e+07	1.79696
Q8CAB8	CAST2	Castor2	Cytosolic arginine sensor for mTORC1 subunit 2 (GATS-like protein 2)	2.22975e+07	1.41048e+07	0.632571	1.67131e+07	3.0028e+07	1.79667
Q8BG05	ROA3	Hnrnpa3	Heterogeneous nuclear ribonucleoprotein A3 (hnRNP A3)	1.53413e+09	1.39857e+09	0.91164	6.71879e+08	1.2053e+09	1.79392
Q9D1L9	LTOR5	Lamtor5	Ragulator complex protein LAMTOR5 (Late endosomal/lysosomal adaptor and MAPK and MTOR activator 5)	4.52615e+06	678411	0.149887	5.29574e+06	9.48622e+06	1.79129
Q8BG67	EFR3A	Efr3a	Protein EFR3 homolog A (Protein EFR3-like)	2.00055e+07	2.54476e+07	1.27203	2.0401e+07	3.64241e+07	1.78541
Q80U04	PJA2	Pja2	E3 ubiquitin-protein ligase Praja-2 (Praja2) (EC 2.3.2.27) (RING finger protein 131) (RING-type E3 ubiquitin transferase Praja-2)	9115444	7.41689e+06	0.813662	8.5887e+06	1.53026e+07	1.78172
Q8BH50	CR025		Uncharacterized protein C18orf25 homolog	1.55879e+07	5.23203e+06	0.335647	1.05496e+07	1.87935e+07	1.78143
Q8BFY6	PEF1	Pef1	Peflin (PEF protein with a long N-terminal hydrophobic domain) (Penta-EF hand domain-containing protein 1)	1.53201e+08	1.50503e+08	0.982386	4.19134e+07	7.46648e+07	1.78141
P22907	HEM3	Hmbs	Porphobilinogen deaminase (PBG-D) (EC 2.5.1.61) (Hydroxymethylbilane synthase) (HMBS) (Pre-uroporphyrinogen synthase)	1.51384e+07	1.58742e+07	1.04861	1.07731e+07	1.9183e+07	1.78065
P19253	RL13A	Rpl13a	60S ribosomal protein L13a (Transplantation antigen P198) (Tum-P198 antigen)	3.62147e+08	2.9711e+08	0.820413	5.30896e+08	9.43878e+08	1.77789
P97449	AMPN	Anpep	Aminopeptidase N (AP-N) (mAPN) (EC 3.4.11.2) (Alanyl aminopeptidase) (Aminopeptidase M) (AP-M) (Membrane protein p161) (Microsomal aminopeptidase) (CD antigen CD13)	5.53004e+07	4.05901e+07	0.733992	3.78472e+07	6.71864e+07	1.7752
Q3U308	CTU2	Ctu2	Cytoplasmic tRNA 2-thiolation protein 2	1.97774e+07	1.35508e+07	0.685165	5.07521e+06	8.99383e+06	1.77211
Q3TZZ7	ESYT2	Esyt2	Extended synaptotagmin-2 (E-Syt2)	4.52679e+07	4.47673e+07	0.988943	4.87104e+07	8.62911e+07	1.77151
Q9QYY8	SPAST	Spast	Spastin (EC 5.6.1.1)	2.95321e+07	4.07941e+07	1.38135	1.57435e+07	2.78367e+07	1.76814
Q3TLH4	PRC2C	Prrc2c	Protein PRRC2C (BAT2 domain-containing protein 1) (HLA-B-associated transcript 2-like 2) (Proline-rich and coiled-coil-containing protein 2C)	2.56648e+07	2.27819e+07	0.887673	2.50949e+07	4.43242e+07	1.76627
Q8R332	NUP58	Nup58	Nucleoporin p58/p45 (58 kDa nucleoporin) (Nucleoporin-like protein 1)	2.47193e+07	678411	0.0274446	1.19086e+07	2.10201e+07	1.76512
O35409	FOLH1	Folh1	Glutamate carboxypeptidase 2 (EC 3.4.17.21) (Folate hydrolase 1) (Folylpoly-gamma-glutamate carboxypeptidase) (FGCP) (Glutamate carboxypeptidase II) (GCPII) (Membrane glutamate carboxypeptidase) (mGCP) (N-acetylated-alpha-linked acidic dipeptidase I) (NAALADase I) (Prostate-specific membrane antigen homolog) (Pteroylpoly-gamma-glutamate carboxypeptidase)	4.18205e+07	4.63013e+07	1.10714	4.27769e+07	7.53683e+07	1.76189
Q3U9G9	LBR	Lbr	Delta(14)-sterol reductase LBR (Delta-14-SR) (EC 1.3.1.70) (3-beta-hydroxysterol Delta (14)-reductase) (C-14 sterol reductase) (C14SR) (Integral nuclear envelope inner membrane protein) (Lamin-B receptor) (Sterol C14-reductase)				5.34061e+06	9.40499e+06	1.76103
Q91VU0	FAM3C	Fam3c	Protein FAM3C (Interleukin-like EMT inducer)	2.86046e+07	1.56513e+07	0.54716	1.15049e+07	2.02033e+07	1.75605
P18826	KPB1	Phka1	Phosphorylase b kinase regulatory subunit alpha, skeletal muscle isoform (Phosphorylase kinase alpha M subunit)	8.3171e+07	1.12659e+07	0.135455	1.27847e+07	2.24417e+07	1.75536
Q62523	ZYX	Zyx	Zyxin	7.79475e+07	5.46039e+07	0.700521	3.62103e+07	6.35557e+07	1.75518
Q9Z0W3	NU160	Nup160	Nuclear pore complex protein Nup160 (160 kDa nucleoporin) (Gene trap locus 1-13 protein) (GTL-13) (Nucleoporin Nup160)				1.61959e+07	2.83946e+07	1.7532
Q9JMG1	EDF1	Edf1	Endothelial differentiation-related factor 1 (EDF-1) (Multiprotein-bridging factor 1) (MBF1)	6.83218e+07	4.76848e+07	0.697944	4.75085e+07	8.3232e+07	1.75194
Q3UE31	K0930		Uncharacterized protein KIAA0930 homolog	2.16777e+07	3.59163e+07	1.65683	2.26927e+07	3.97198e+07	1.75034
Q8BGW1	FTO	Fto	Alpha-ketoglutarate-dependent dioxygenase FTO (Fat mass and obesity-associated protein) (Protein fatso) (U6 small nuclear RNA (2'-O-methyladenosine-N(6)-)-demethylase FTO) (EC 1.14.11.-) (U6 small nuclear RNA N(6)-methyladenosine-demethylase FTO) (EC 1.14.11.-) (mRNA (2'-O-methyladenosine-N(6)-)-demethylase FTO) (m6A(m)-demethylase FTO) (EC 1.14.11.-) (mRNA N(6)-methyladenosine demethylase FTO) (…	1.13583e+07	1.18832e+07	1.04621	1.20895e+07	2.11172e+07	1.74674
P23591	FCL	Gfus	GDP-L-fucose synthase (EC 1.1.1.271) (GDP-4-keto-6-deoxy-D-mannose-3,5-epimerase-4-reductase) (Protein FX) (Red cell NADP(H)-binding protein) (Transplantation antigen P35B) (Tum-P35B antigen)	3.22448e+07	3.36915e+07	1.04487	2.02033e+07	3.51888e+07	1.74174
Q923D5	WBP11	Wbp11	WW domain-binding protein 11 (WBP-11) (Splicing factor that interacts with PQBP-1 and PP1)	2.20041e+07	3.41744e+07	1.5531	1.49987e+07	2.60943e+07	1.73978
A2AG50	MA7D2	Map7d2	MAP7 domain-containing protein 2	1.26771e+08	1.40002e+08	1.10437	7.52217e+07	1.30574e+08	1.73585
Q921L3	TMCO1	Tmco1	Calcium load-activated calcium channel (CLAC channel) (Transmembrane and coiled-coil domain-containing protein 1)	2.29145e+07	2.1026e+07	0.917585	5.85317e+07	1.01566e+08	1.73523
Q9JK81	MYG1	Myg1	MYG1 exonuclease (EC 3.1.-.-) (Protein Gamm1)	6.18214e+07	7.50633e+07	1.2142	1.98817e+07	3.44737e+07	1.73394
Q78T54	VMA21	Vma21	Vacuolar ATPase assembly integral membrane protein Vma21	1.34329e+08	1.42414e+08	1.06019	1.42023e+08	2.46011e+08	1.73219
Q61554	FBN1	Fbn1	Fibrillin-1 [Cleaved into: Asprosin]	678411	1.00203e+08	147.702	9.20955e+07	1.59508e+08	1.73198
Q922H1	ANM3	Prmt3	Protein arginine N-methyltransferase 3 (EC 2.1.1.319) (Heterogeneous nuclear ribonucleoprotein methyltransferase-like protein 3)	27352084	2.872e+07	1.05001	1.38361e+07	2.39467e+07	1.73074
O35969	GAMT	Gamt	Guanidinoacetate N-methyltransferase (EC 2.1.1.2)	3.28235e+07	5.51167e+07	1.67918	3.14171e+07	5.40662e+07	1.72092
Q922F4	TBB6	Tubb6	Tubulin beta-6 chain	5.25047e+09	2.62748e+10	5.00427	2.21992e+09	3.81834e+09	1.72004
Q0VE82	CPNE7	Cpne7	Copine-7 (Copine VII)	6.83115e+07	5.19727e+07	0.760819	4.63397e+07	7.9513e+07	1.71587
Q5SUR0	PUR4	Pfas	Phosphoribosylformylglycinamidine synthase (FGAM synthase) (FGAMS) (EC 6.3.5.3) (Formylglycinamide ribonucleotide amidotransferase) (FGAR amidotransferase) (FGAR-AT) (Formylglycinamide ribotide amidotransferase)	1.28862e+08	1.16033e+08	0.900449	9.25471e+07	1.5857e+08	1.7134
Q5SSH7	ZZEF1	Zzef1	Zinc finger ZZ-type and EF-hand domain-containing protein 1	1.37039e+08	1.6295e+07	0.118907	8.92502e+06	1.52595e+07	1.70974
P61600	NAA20	Naa20	N-alpha-acetyltransferase 20 (EC 2.3.1.254) (Methionine N-acetyltransferase) (N-acetyltransferase 5) (N-terminal acetyltransferase B complex catalytic subunit NAA20) (N-terminal acetyltransferase B complex catalytic subunit NAT5) (NatB complex subunit NAT5) (NatB catalytic subunit)	20273775	3.965e+07	1.95573	2.14057e+07	3.64776e+07	1.70411
P97742	CPT1A	Cpt1a	Carnitine O-palmitoyltransferase 1, liver isoform (CPT1-L) (EC 2.3.1.21) (Carnitine O-palmitoyltransferase I, liver isoform) (CPT I) (CPTI-L) (Carnitine palmitoyltransferase 1A)	7.43869e+07	8.73769e+07	1.17463	2.10868e+07	3.58781e+07	1.70145
O08583	THOC4	Alyref	THO complex subunit 4 (Tho4) (Ally of AML-1 and LEF-1) (Aly/REF export factor) (REF1-I) (RNA and export factor-binding protein 1) (Transcriptional coactivator Aly/REF)	1.89465e+08	1.76799e+08	0.933148	1.8888e+08	3.21369e+08	1.70145
P63147	UBE2B	Ube2b	Ubiquitin-conjugating enzyme E2 B (EC 2.3.2.23) (E2 ubiquitin-conjugating enzyme B) (E214K) (RAD6 homolog B) (HR6B) (mHR6B) (Ubiquitin carrier protein B) (Ubiquitin-protein ligase B)				1.94905e+07	3.31548e+07	1.70108
P18572	BASI	Bsg	Basigin (Basic immunoglobulin superfamily) (HT7 antigen) (Membrane glycoprotein gp42) (CD antigen CD147)	8.47385e+08	8.50563e+08	1.00375	4.11361e+08	6.99082e+08	1.69944
Q8C079	STRP1	Strip1	Striatin-interacting protein 1 (Protein FAM40A)	8.7313e+07	6.196e+07	0.709631	4.00247e+07	6.80181e+07	1.6994
Q6IRU2	TPM4	Tpm4	Tropomyosin alpha-4 chain (Tropomyosin-4)	1.57123e+08	1.68032e+08	1.06943	1.03603e+08	1.76005e+08	1.69883
Q80YA3	DDHD1	Ddhd1	Phospholipase DDHD1 (EC 3.1.1.-) (DDHD domain-containing protein 1) (Phosphatidic acid-preferring phospholipase A1 homolog) (PA-PLA1)	3.24129e+07	1.7463e+07	0.538767	7.54536e+06	1.28081e+07	1.69747
P59279	RAB2B	Rab2b	Ras-related protein Rab-2B	4.04575e+07	6.14228e+07	1.51821	3.84475e+07	6.50914e+07	1.693
Q80Y55	BSDC1	Bsdc1	BSD domain-containing protein 1	2.34564e+07	3.8972e+07	1.66147	2.29207e+07	3.87621e+07	1.69114
Q9R0N5	SYT5	Syt5	Synaptotagmin-5 (Synaptotagmin IX) (Synaptotagmin V) (SytV)	1.50222e+07	2.17945e+07	1.45082	1.39454e+07	2.35831e+07	1.6911
Q8C6B2	RTKN	Rtkn	Rhotekin	1.41886e+07	678411	0.0478139	7.56504e+06	1.27752e+07	1.68872
Q6PIP5	NUDC1	Nudcd1	NudC domain-containing protein 1	2.15121e+07	7.77668e+07	3.61503	2.1531e+07	3.63541e+07	1.68845
Q3URE1	ACSF3	Acsf3	Malonate--CoA ligase ACSF3, mitochondrial (EC 6.2.1.n3) (Acyl-CoA synthetase family member 3)	3.21527e+07	5.29531e+07	1.64693	2.19763e+07	3.71006e+07	1.68821
P70460	VASP	Vasp	Vasodilator-stimulated phosphoprotein (VASP)	1.62879e+07	1.05531e+07	0.647912	8.02444e+06	1.35214e+07	1.68502
Q810C1	SLIK1	Slitrk1	SLIT and NTRK-like protein 1	2.78752e+07	1.56371e+07	0.560971	1.07179e+07	1.80549e+07	1.68456
O35684	NEUS	Serpini1	Neuroserpin (Peptidase inhibitor 12) (PI-12) (Serine protease inhibitor 17) (Serpin I1)	1.41104e+07	1.30368e+07	0.923912	1.0001e+07	1.68462e+07	1.68445
Q8BZJ7	DCNL2	Dcun1d2	DCN1-like protein 2 (DCNL2) (DCUN1 domain-containing protein 2) (Defective in cullin neddylation protein 1-like protein 2)	2.27209e+07	21737502	0.956717	1.94033e+07	3.26714e+07	1.6838
Q8K2Q5	CHCH7	Chchd7	Coiled-coil-helix-coiled-coil-helix domain-containing protein 7				2.02822e+07	3.41359e+07	1.68305
Q8VHH7	ADCY3	Adcy3	Adenylate cyclase type 3 (EC 4.6.1.1) (ATP pyrophosphate-lyase 3) (Adenylate cyclase type III) (AC-III) (Adenylate cyclase, olfactive type) (Adenylyl cyclase 3) (AC3)	1.76499e+07	8.9046e+06	0.504513	8.41916e+06	1.41655e+07	1.68253
Q3U1V6	UEVLD	Uevld	Ubiquitin-conjugating enzyme E2 variant 3 (UEV-3) (EV and lactate/malate dehydrogenase domain-containing protein)	8.36117e+06	1.0044e+07	1.20127	9.5352e+06	1.5994e+07	1.67736
P31750	AKT1	Akt1	RAC-alpha serine/threonine-protein kinase (EC 2.7.11.1) (AKT1 kinase) (Protein kinase B) (PKB) (Protein kinase B alpha) (PKB alpha) (Proto-oncogene c-Akt) (RAC-PK-alpha) (Thymoma viral proto-oncogene)	5.30618e+07	2.93971e+07	0.554017	3.61003e+07	6.04148e+07	1.67352
O08808	DIAP1	Diaph1	Protein diaphanous homolog 1 (Diaphanous-related formin-1) (DRF1) (p140mDIA) (mDIA1)	3.92823e+07	3.5665e+07	0.907916	1.94584e+07	3.25617e+07	1.67341
Q8QZY9	SF3B4	Sf3b4	Splicing factor 3B subunit 4	1.43774e+07	3.56005e+07	2.47615	2.99307e+07	5.00651e+07	1.6727
Q9ET22	DPP2	Dpp7	Dipeptidyl peptidase 2 (EC 3.4.14.2) (Dipeptidyl aminopeptidase II) (Dipeptidyl peptidase 7) (Dipeptidyl peptidase II) (DPP II) (Quiescent cell proline dipeptidase)	2.24665e+07	10587926	0.471277	1.59699e+07	2.67078e+07	1.67238
P49586	PCY1A	Pcyt1a	Choline-phosphate cytidylyltransferase A (EC 2.7.7.15) (CCT-alpha) (CTP:phosphocholine cytidylyltransferase A) (CCT A) (CT A) (Phosphorylcholine transferase A)	1.49112e+07	678411	0.0454966	8.49924e+06	1.42092e+07	1.67182
Q80X73	PELO	Pelo	Protein pelota homolog (EC 3.1.-.-)	1.01852e+07	4.64492e+06	0.456047	3.4911e+06	5.82874e+06	1.6696
Q8K2I1	FNTB	Fntb	Protein farnesyltransferase subunit beta (FTase-beta) (EC 2.5.1.58) (CAAX farnesyltransferase subunit beta) (Ras proteins prenyltransferase subunit beta)	2.64169e+07	29750482	1.12619	1.30895e+07	2.18397e+07	1.66849
Q9Z1Q2	ABHGA	Abhd16a	Phosphatidylserine lipase ABHD16A (EC 3.1.-.-) (Alpha/beta hydrolase domain-containing protein 16A) (Abhydrolase domain-containing protein 16A) (HLA-B-associated transcript 5) (mBAT5) (Monoacylglycerol lipase ABHD16A) (EC 3.1.1.23)	8.44523e+07	8.46985e+07	1.00292	4.07034e+07	6.78962e+07	1.66807
Q91XI1	DUS3L	Dus3l	tRNA-dihydrouridine(47) synthase [NAD(P)(+)]-like (EC 1.3.1.-) (tRNA-dihydrouridine synthase 3-like)	2.62714e+07	3.43636e+07	1.30802	1.68752e+07	2.81379e+07	1.66741
Q9CZN4	SHSA9	Shisa9	Protein shisa-9 (Cystine-knot AMPAR modulating protein of 44 kDa) (CKAMP44)	3.12879e+07	2.03018e+07	0.64887	2.15992e+07	3.59905e+07	1.66628
Q3URY6	ARMC2	Armc2	Armadillo repeat-containing protein 2				1.65393e+08	2.75081e+08	1.6632
O09114	PTGDS	Ptgds	Prostaglandin-H2 D-isomerase (EC 5.3.99.2) (Glutathione-independent PGD synthase) (Lipocalin-type prostaglandin-D synthase) (Prostaglandin-D2 synthase) (L-PGDS) (PGD2 synthase) (PGDS2)	4.9584e+08	2.0977e+08	0.42306	4.03673e+08	6.71155e+08	1.66262
P51830	ADCY9	Adcy9	Adenylate cyclase type 9 (EC 4.6.1.1) (ATP pyrophosphate-lyase 9) (Adenylate cyclase type IX) (Adenylyl cyclase 9) (AC9) (Adenylyl cyclase type 10) (ACTP10)	1.31679e+08	1.37039e+08	1.04071	1.06624e+08	1.77263e+08	1.66251
Q7TNM2	TRI46	Trim46	Tripartite motif-containing protein 46 (Gene Y protein) (GeneY) (Tripartite, fibronectin type-III and C-terminal SPRY motif protein)	2.50509e+07	2.56721e+07	1.0248	9.36866e+06	1.55654e+07	1.66143
Q8VD66	ABHD4	Abhd4	(Lyso)-N-acylphosphatidylethanolamine lipase (EC 3.1.1.-) (Alpha/beta hydrolase domain-containing protein 4) (Abhydrolase domain-containing protein 4) (Alpha/beta-hydrolase 4)	3.89978e+07	3.27507e+07	0.839809	2.2465e+07	3.72667e+07	1.65888
Q8BR92	PALM2	Palm2	Paralemmin-2	1.45106e+08	1.44903e+08	0.998601	1.49953e+08	2.4872e+08	1.65865
Q8K1L5	PP1RB	Ppp1r11	E3 ubiquitin-protein ligase PPP1R11 (EC 2.3.2.27) (Protein phosphatase 1 regulatory subunit 11) (T-complex testis expressed protein 5) (Tctex-5)	1.36616e+08	1.29957e+08	0.951258	5.44953e+07	9.01758e+07	1.65475
Q3UI43	BABA1	Babam1	BRISC and BRCA1-A complex member 1 (Mediator of RAP80 interactions and targeting subunit of 40 kDa) (New component of the BRCA1-A complex)	4.23819e+07	3.27454e+07	0.772627	1.36602e+07	2.25821e+07	1.65313
Q9JJ61	GLT16	Galnt16	Polypeptide N-acetylgalactosaminyltransferase 16 (EC 2.4.1.41) (Polypeptide GalNAc transferase 16) (GalNAc-T16) (Polypeptide GalNAc transferase-like protein 1) (GalNAc-T-like protein 1) (pp-GaNTase-like protein 1) (Polypeptide N-acetylgalactosaminyltransferase-like protein 1) (Protein-UDP acetylgalactosaminyltransferase-like protein 1) (UDP-GalNAc:polypeptide N-acetylgalactosaminyltransferase-lik…	3.16861e+07	3.51986e+07	1.11085	2.32122e+07	3.83665e+07	1.65286
Q0VGU4	VGF	Vgf	Neurosecretory protein VGF [Cleaved into: Neuroendocrine regulatory peptide-1 (NERP-1); Neuroendocrine regulatory peptide-2 (NERP-2); VGF-derived peptide TLQP-21; VGF-derived peptide TLQP-62]	8.45239e+07	1.54886e+08	1.83245	6.29827e+07	1.03877e+08	1.6493
Q8BYK6	YTHD3	Ythdf3	YTH domain-containing family protein 3	2.32073e+07	2.31639e+07	0.998127	4.14718e+07	6.83317e+07	1.64767
Q9Z2W8	GRIA4	Gria4	Glutamate receptor 4 (GluR-4) (GluR4) (AMPA-selective glutamate receptor 4) (GluR-D) (Glutamate receptor ionotropic, AMPA 4) (GluA4)	8.68468e+07	3.88154e+08	4.46941	2.47576e+08	4.06889e+08	1.64349
Q9CQZ1	HSBP1	Hsbp1	Heat shock factor-binding protein 1	4.27717e+08	1.79182e+08	0.418927	2.94508e+08	4.8362e+08	1.64212
Q61137	ASTN1	Astn1	Astrotactin-1 (Neuronal migration protein GC14)	1.08634e+08	9.15532e+07	0.842766	5.51189e+07	9.04641e+07	1.64125
Q61282	PGCA	Acan	Aggrecan core protein (Cartilage-specific proteoglycan core protein) (CSPCP)	1.70447e+08	2.03913e+08	1.19634	1.16567e+08	1.91275e+08	1.64091
O35598	ADA10	Adam10	Disintegrin and metalloproteinase domain-containing protein 10 (ADAM 10) (EC 3.4.24.81) (Kuzbanian protein homolog) (Mammalian disintegrin-metalloprotease) (CD antigen CD156c)	6.16804e+07	8.34902e+07	1.35359	7.21516e+07	1.18351e+08	1.6403
Q8C0J2	A16L1	Atg16l1	Autophagy-related protein 16-1 (APG16-like 1)	3.95442e+07	4.21013e+07	1.06466	1.70617e+07	2.79602e+07	1.63877
P04627	ARAF	Araf	Serine/threonine-protein kinase A-Raf (EC 2.7.11.1) (Proto-oncogene A-Raf)	1.44075e+08	1.38147e+08	0.958857	6.57182e+07	1.07683e+08	1.63856
Q8CGM1	AGRB2	Adgrb2	Adhesion G protein-coupled receptor B2 (Brain-specific angiogenesis inhibitor 2)	2.54833e+07	1.90702e+07	0.74834	1.38952e+07	2.27497e+07	1.63724
Q9QZH3	PPIE	Ppie	Peptidyl-prolyl cis-trans isomerase E (PPIase E) (EC 5.2.1.8) (Cyclophilin E) (Cyclophilin-33) (Rotamase E)				10283750	1.67889e+07	1.63256
P29595	NEDD8	Nedd8	NEDD8 (Neddylin) (Neural precursor cell expressed developmentally down-regulated protein 8) (NEDD-8) (Ubiquitin-like protein Nedd8)	1.8735e+08	2.22626e+08	1.18829	1.49668e+08	2.43222e+08	1.62507
Q9ERS5	PKHA2	Plekha2	Pleckstrin homology domain-containing family A member 2 (PH domain-containing family A member 2) (PH domain-containing adaptor PHAD47) (Tandem PH domain-containing protein 2) (TAPP-2)	678411	1.76499e+07	26.0165	8.86721e+06	1.44066e+07	1.6247
Q9D8T7	SLIRP	Slirp	SRA stem-loop-interacting RNA-binding protein, mitochondrial	1.09975e+08	1.68437e+07	0.153159	4.13819e+07	6.72262e+07	1.62453
Q8VED9	LEGL	Lgalsl	Galectin-related protein (Galectin-related protein A) (Lectin galactoside-binding-like protein A)	5.34117e+08	5.62442e+08	1.05303	3.33527e+08	5.41395e+08	1.62324
Q5PR69	CRACD	Cracd	Capping protein-inhibiting regulator of actin dynamics (Cancer-related regulator of actin dynamics)	1.3397e+07	1.35818e+07	1.0138	9.11492e+06	1.47944e+07	1.6231
Q8QZV4	ST32C	Stk32c	Serine/threonine-protein kinase 32C (EC 2.7.11.1)	8.17943e+07	6.08483e+07	0.743919	3.25866e+07	5.27985e+07	1.62025
Q99N85	RT18A	Mrps18a	28S ribosomal protein S18a, mitochondrial (MRP-S18-a) (Mrps18a) (S18mt-a) (28S ribosomal protein S18-3, mitochondrial) (MRP-S18-3)				9.85995e+06	1.59593e+07	1.6186
Q9ET80	JPH1	Jph1	Junctophilin-1 (JP-1) (Junctophilin type 1)	5.14877e+07	4.89904e+07	0.951498	2.57148e+07	4.15413e+07	1.61546
Q8CFV4	NRN1	Nrn1	Neuritin (Candidate plasticity gene 15 protein)	4.43857e+08	3.71628e+08	0.83727	2.33896e+08	3.76832e+08	1.61111
P16858	G3P	Gapdh	Glyceraldehyde-3-phosphate dehydrogenase (GAPDH) (EC 1.2.1.12) (Peptidyl-cysteine S-nitrosylase GAPDH) (EC 2.6.99.-)	3.53373e+10	3.53373e+10	1	2.7698e+10	4.45232e+10	1.60745
Q9JL35	HMGN5	Hmgn5	High mobility group nucleosome-binding domain-containing protein 5 (Nucleosome-binding protein 1) (Nucleosome-binding protein 45) (NBP-45) (Protein GARP45)	3.45364e+07	3.22898e+07	0.934949	7.77455e+07	1.24672e+08	1.60359
Q9D6U8	F162A	Fam162a	Protein FAM162A (E2-induced gene 5 protein homolog) (Growth and transformation-dependent protein) (HGTD-P)	2.60928e+08	3.05159e+08	1.16951	2.16457e+08	3.46889e+08	1.60257
Q3UHD3	MTUS2	Mtus2	Microtubule-associated tumor suppressor candidate 2 homolog (Cardiac zipper protein) (Microtubule plus-end tracking protein TIP150) (Tracking protein of 150 kDa)	7.22028e+06	5.13883e+06	0.711722	1.24992e+07	1.99888e+07	1.59921
Q80ZI6	LRSM1	Lrsam1	E3 ubiquitin-protein ligase LRSAM1 (EC 2.3.2.27) (Leucine-rich repeat and sterile alpha motif-containing protein 1) (RING-type E3 ubiquitin transferase LRSAM1) (Tsg101-associated ligase)	1.15508e+07	1.51384e+07	1.31059	1.11634e+07	1.78165e+07	1.59598
Q9D0S9	HINT2	Hint2	Adenosine 5'-monophosphoramidase HINT2 (EC 3.9.1.-) (HINT-3) (Histidine triad nucleotide-binding protein 2, mitochondrial) (HINT-2)	3.00059e+08	2.60928e+08	0.869591	1.62968e+08	2.59898e+08	1.59478
Q9Z0H8	CLIP2	Clip2	CAP-Gly domain-containing linker protein 2 (Cytoplasmic linker protein 115) (CLIP-115) (Cytoplasmic linker protein 2)	1.74744e+08	2.16963e+08	1.24161	1.12523e+08	1.79298e+08	1.59343
O88851	RBBP9	Rbbp9	Putative hydrolase RBBP9 (EC 3.-.-.-) (B5T-overexpressed gene protein) (Protein BOG) (Retinoblastoma-binding protein 9) (RBBP-9)	1.699e+08	2.03066e+08	1.19521	1.3079e+08	2.08245e+08	1.5922
Q7TN98	CPEB4	Cpeb4	Cytoplasmic polyadenylation element-binding protein 4 (CPE-BP4) (CPE-binding protein 4) (mCPEB-4)	1.4442e+07	1.30958e+07	0.906787	1.56842e+07	2.49436e+07	1.59037
Q9D8S3	ARFG3	Arfgap3	ADP-ribosylation factor GTPase-activating protein 3 (ARF GAP 3)	1.45405e+07	1.37839e+07	0.947964	1.20408e+07	1.91387e+07	1.58948
P48193	EPB41	Epb41	Protein 4.1 (P4.1) (4.1R) (Band 4.1) (Erythrocyte membrane protein band 4.1)				1.08351e+07	1.71558e+07	1.58336
Q8QZT2	CCSAP	Ccsap	Centriole, cilia and spindle-associated protein	1.98016e+08	2.15074e+08	1.08615	1.07208e+08	1.69577e+08	1.58176
Q8C0L8	COG5	Cog5	Conserved oligomeric Golgi complex subunit 5 (COG complex subunit 5) (Component of oligomeric Golgi complex 5)	9570824	678411	0.0708832	5.38482e+06	8.49924e+06	1.57837
Q60805	MERTK	Mertk	Tyrosine-protein kinase Mer (EC 2.7.10.1) (Proto-oncogene c-Mer) (Receptor tyrosine kinase MerTK)	2.51071e+07	2.47795e+07	0.986952	1.9928e+07	3.14171e+07	1.57652
O89026	ROBO1	Robo1	Roundabout homolog 1	1.49747e+07	1.84198e+07	1.23006	1.21986e+07	1.92249e+07	1.576
Q9D164	FXYD6	Fxyd6	FXYD domain-containing ion transport regulator 6 (PLM-like protein) (Phosphohippolin)	6.05399e+07	6.27614e+07	1.03669	95627128	1.50484e+08	1.57366
Q9D1K2	VATF	Atp6v1f	V-type proton ATPase subunit F (V-ATPase subunit F) (V-ATPase 14 kDa subunit) (Vacuolar proton pump subunit F)	1.05821e+09	9.76426e+08	0.922715	5.7003e+08	8.95435e+08	1.57086
Q8C0L0	TMX4	Tmx4	Thioredoxin-related transmembrane protein 4 (Thioredoxin domain-containing protein 13)	6.13481e+07	678411	0.0110584	1.09218e+08	1.71431e+08	1.56962
O08663	MAP2	Metap2	Methionine aminopeptidase 2 (MAP 2) (MetAP 2) (EC 3.4.11.18) (Initiation factor 2-associated 67 kDa glycoprotein) (p67) (p67eIF2) (Peptidase M)	7.22192e+07	5.85804e+07	0.811148	2.90926e+07	4.5637e+07	1.56868
P63028	TCTP	Tpt1	Translationally-controlled tumor protein (TCTP) (21 kDa polypeptide) (p21) (p23)	8.11563e+08	7.58717e+08	0.934884	4.67381e+08	7.32689e+08	1.56765
P63166	SUMO1	Sumo1	Small ubiquitin-related modifier 1 (SUMO-1) (SMT3 homolog 3) (Ubiquitin-homology domain protein PIC1) (Ubiquitin-like protein SMT3C) (Smt3C)	6.00571e+07	6.42528e+07	1.06986	6.78962e+07	1.06371e+08	1.56667
O35621	PMM1	Pmm1	Phosphomannomutase 1 (PMM 1) (EC 5.4.2.8)	1.55693e+08	1.54661e+08	0.993374	7.70042e+07	1.20411e+08	1.5637
A2AJI0	MA7D1	Map7d1	MAP7 domain-containing protein 1	678411	8.08682e+07	119.202	4.54109e+07	7.09769e+07	1.56299
P52800	EFNB2	Efnb2	Ephrin-B2 (ELF-2) (EPH-related receptor tyrosine kinase ligand 5) (LERK-5) (HTK ligand) (HTK-L)	2.64304e+07	2.38553e+07	0.90257	1.23698e+07	1.93287e+07	1.56257
Q9R1C6	DGKE	Dgke	Diacylglycerol kinase epsilon (DAG kinase epsilon) (EC 2.7.1.107) (Diglyceride kinase epsilon) (DGK-epsilon)	6.10959e+07	6.72241e+07	1.10031	6.72317e+07	1.05004e+08	1.56183
Q8VHQ9	ACO11	Acot11	Acyl-coenzyme A thioesterase 11 (Acyl-CoA thioesterase 11) (EC 3.1.2.-) (Acyl-CoA thioester hydrolase 11) (Adipose-associated thioesterase) (Brown fat-inducible thioesterase) (BFIT) (Palmitoyl-coenzyme A thioesterase) (EC 3.1.2.2)	81194106	9.27563e+07	1.1424	4.80354e+07	7.49613e+07	1.56054
Q9CRD4	DBND2	Dbndd2	Dysbindin domain-containing protein 2				5.14819e+07	8.02916e+07	1.55961
Q8K2Q0	COMD9	Commd9	COMM domain-containing protein 9	3.98699e+07	5.6609e+07	1.41984	3.74244e+07	5.831e+07	1.55807
O09159	MA2B1	Man2b1	Lysosomal alpha-mannosidase (Laman) (EC 3.2.1.24) (Lysosomal acid alpha-mannosidase) (Mannosidase alpha class 2B member 1) (Mannosidase alpha-B)				4.64532e+06	7.22386e+06	1.55508
Q5H8C4	VP13A	Vps13a	Vacuolar protein sorting-associated protein 13A (Chorea-acanthocytosis protein homolog) (Chorein)	1.08332e+08	4.56638e+07	0.421518	4.82163e+07	7.49096e+07	1.55362
Q9D1F4	AKTS1	Akt1s1	Proline-rich AKT1 substrate 1 (Proline-rich AKT substrate)	3.52628e+07	678411	0.0192387	5.17632e+07	8.041e+07	1.55342
Q61361	PGCB	Bcan	Brevican core protein	2.11894e+09	2.30612e+09	1.08833	1.20139e+09	1.86577e+09	1.55302
Q60829	PPR1B	Ppp1r1b	Protein phosphatase 1 regulatory subunit 1B (DARPP-32) (Dopamine- and cAMP-regulated neuronal phosphoprotein)	2.16534e+08	1.63087e+08	0.753168	1.70332e+08	2.64191e+08	1.55103
Q8CCJ3	UFL1	Ufl1	E3 UFM1-protein ligase 1 (EC 2.3.2.-) (E3 UFM1-protein transferase 1) (Multiple alpha-helix protein located at ER) (Regulator of C53/LZAP and DDRGK1)	2.69543e+07	2.31989e+07	0.860676	1.85441e+07	2.87339e+07	1.54949
Q61550	RAD21	Rad21	Double-strand-break repair protein rad21 homolog (mHR21) (Pokeweed agglutinin-binding protein 29) (PW29) (SCC1 homolog) [Cleaved into: 64-kDa C-terminal product (64-kDa carboxy-terminal product)]	5.56843e+06	5.31886e+06	0.955182	5.78489e+06	8.94275e+06	1.54588
Q8R404	MIC13	Micos13	MICOS complex subunit MIC13	2.78859e+08	3.0767e+08	1.10332	2.13801e+08	3.30382e+08	1.54528
Q9JMK2	KC1E	Csnk1e	Casein kinase I isoform epsilon (CKI-epsilon) (CKIe) (EC 2.7.11.1)	4.52248e+07	3.57173e+07	0.789773	4.06812e+07	6.28609e+07	1.54521
Q6PDQ2	CHD4	Chd4	Chromodomain-helicase-DNA-binding protein 4 (CHD-4) (EC 3.6.4.12)	3.67762e+07	3.18925e+07	0.867203	2.38991e+07	3.69126e+07	1.54452
Q9JIG8	PRAF2	Praf2	PRA1 family protein 2	1.24752e+08	1.23918e+08	0.993316	1.2675e+08	1.95378e+08	1.54144
Q62179	SEM4B	Sema4b	Semaphorin-4B (Semaphorin-C) (Sema C)	1.24767e+07	1.38156e+07	1.10731	1.67372e+07	2.57815e+07	1.54037
Q8CJH3	PLXB1	Plxnb1	Plexin-B1	1.32371e+08	1.40613e+08	1.06227	7.17835e+07	1.10567e+08	1.54028
Q80W21	GSTM7	Gstm7	Glutathione S-transferase Mu 7 (EC 2.5.1.18) (GST class-mu 7) (GSTM-7)	1.78811e+08	2.21467e+08	1.23856	6.26286e+07	9.63686e+07	1.53873
Q3TKT4	SMCA4	Smarca4	Transcription activator BRG1 (EC 3.6.4.-) (ATP-dependent helicase SMARCA4) (BRG1-associated factor 190A) (BAF190A) (Protein brahma homolog 1) (SNF2-beta) (SWI/SNF-related matrix-associated actin-dependent regulator of chromatin subfamily A member 4)	1.65163e+07	1.93573e+07	1.17201	9.98566e+06	1.53621e+07	1.53842
Q61687	ATRX	Atrx	Transcriptional regulator ATRX (EC 3.6.4.12) (ATP-dependent helicase ATRX) (HP1 alpha-interacting protein) (HP1-BP38 protein) (Heterochromatin protein 2) (X-linked nuclear protein)	1.69017e+07	1.32291e+07	0.782708	9.25573e+06	1.42234e+07	1.53671
Q8VEK0	CC50A	Tmem30a	Cell cycle control protein 50A (P4-ATPase flippase complex beta subunit TMEM30A) (Transmembrane protein 30A)	598242556	3.18228e+08	0.531938	9.16043e+07	1.40503e+08	1.5338
Q9D6F4	GBRA4	Gabra4	Gamma-aminobutyric acid receptor subunit alpha-4 (GABA(A) receptor subunit alpha-4)	2.12285e+07	2.70877e+07	1.27601	1.90119e+07	2.8987e+07	1.52468
Q9QYE9	PKHB1	Plekhb1	Pleckstrin homology domain-containing family B member 1 (PH domain-containing family B member 1) (Evectin-1) (PH domain-containing protein in retina 1) (PHRET1) (Pleckstrin homology domain retinal protein 1)	6.89552e+07	7.72922e+07	1.12091	5.39396e+07	8.22181e+07	1.52426
Q8BH69	SPS1	Sephs1	Selenide, water dikinase 1 (EC 2.7.9.3) (Selenium donor protein 1) (Selenophosphate synthase 1)	9.07135e+07	5.49051e+07	0.605259	2.92026e+07	4.43915e+07	1.52012
Q61120	SHC3	Shc3	SHC-transforming protein 3 (Neuronal Shc) (N-Shc) (SHC-transforming protein C) (Src homology 2 domain-containing-transforming protein C3) (SH2 domain protein C3)	2.07747e+07	678411	0.0326556	1.90441e+07	2.89388e+07	1.51957
Q8C1M2	ZN428	Znf428	Zinc finger protein 428	2.06348e+07	678411	0.032877	1.92104e+07	2.91892e+07	1.51945
Q8VDQ1	PTGR2	Ptgr2	Prostaglandin reductase 2 (PRG-2) (EC 1.3.1.48) (15-oxoprostaglandin 13-reductase) (Zinc-binding alcohol dehydrogenase domain-containing protein 1)	9.96847e+07	1.21381e+08	1.21765	6.51246e+07	9.89156e+07	1.51887
Q9DBG5	PLIN3	Plin3	Perilipin-3 (Cargo selection protein TIP47) (Mannose-6-phosphate receptor-binding protein 1)	7.31926e+07	7.9943e+07	1.09223	7.59654e+07	1.15331e+08	1.51821
Q9D0A3	ARPIN	Arpin	Arpin (Arp2/3 inhibition protein)	3.90346e+07	4.81617e+07	1.23382	3.09115e+07	4.69124e+07	1.51763
Q9DBR0	AKAP8	Akap8	A-kinase anchor protein 8 (AKAP-8) (A-kinase anchor protein 95 kDa) (AKAP 95)	1.17422e+07	8.04066e+06	0.684766	5.82874e+06	8.83217e+06	1.51528
P59644	PI5PA	Inpp5j	Phosphatidylinositol 4,5-bisphosphate 5-phosphatase A (EC 3.1.3.56) (Inositol polyphosphate 5-phosphatase J)	4.66394e+07	4.68539e+07	1.0046	1.93287e+07	2.92552e+07	1.51356
Q80V26	IMPA3	Bpnt2	Golgi-resident adenosine 3',5'-bisphosphate 3'-phosphatase (Golgi-resident PAP phosphatase) (gPAPP) (EC 3.1.3.7) (3'(2'), 5'-bisphosphate nucleotidase 2) (Inositol monophosphatase domain-containing protein 1) (Myo-inositol monophosphatase A3) (Phosphoadenosine phosphate 3'-nucleotidase)	5.51657e+07	4.44754e+07	0.806214	2.64389e+07	4.00121e+07	1.51338
Q8BRV5	K1671	Kiaa1671	Uncharacterized protein KIAA1671	1.55118e+08	9.41683e+07	0.607076	9.68174e+07	1.46406e+08	1.51218
P56528	CD38	Cd38	ADP-ribosyl cyclase/cyclic ADP-ribose hydrolase 1 (EC 3.2.2.6) (2'-phospho-ADP-ribosyl cyclase) (2'-phospho-ADP-ribosyl cyclase/2'-phospho-cyclic-ADP-ribose transferase) (EC 2.4.99.20) (2'-phospho-cyclic-ADP-ribose transferase) (ADP-ribosyl cyclase 1) (ADPRC 1) (Cyclic ADP-ribose hydrolase 1) (cADPr hydrolase 1) (I-19) (NIM-R5 antigen) (CD antigen CD38)	3.88605e+07	3.78165e+07	0.973136	1.81773e+07	2.74862e+07	1.51212
Q61543	GSLG1	Glg1	Golgi apparatus protein 1 (E-selectin ligand 1) (ESL-1) (Selel) (Golgi sialoglycoprotein MG-160)	6.32635e+07	6.32556e+07	0.999876	8.88731e+07	1.34347e+08	1.51168
Q9CYN2	SPCS2	Spcs2	Signal peptidase complex subunit 2 (EC 3.4.-.-) (Microsomal signal peptidase 25 kDa subunit) (SPase 25 kDa subunit)	2.29813e+07	1.27518e+07	0.554877	1.5889e+07	2.4014e+07	1.51136
Q9CQ60	6PGL	Pgls	6-phosphogluconolactonase (6PGL) (EC 3.1.1.31)	3.51678e+08	2.4394e+08	0.693645	2.35634e+08	3.56116e+08	1.51131
P97952	SCN1B	Scn1b	Sodium channel subunit beta-1	1.1275e+08	1.41713e+08	1.25688	9.90229e+07	1.49464e+08	1.50939
O35618	MDM4	Mdm4	Protein Mdm4 (Double minute 4 protein) (Mdm2-like p53-binding protein) (Protein Mdmx) (p53-binding protein Mdm4)				1.72668e+06	2.60511e+06	1.50874
Q8CBF3	EPHB1	Ephb1	Ephrin type-B receptor 1 (EC 2.7.10.1)				3.72765e+06	5.61918e+06	1.50743
P15379	CD44	Cd44	CD44 antigen (Extracellular matrix receptor III) (ECMR-III) (GP90 lymphocyte homing/adhesion receptor) (HUTCH-I) (Hermes antigen) (Hyaluronate receptor) (Lymphocyte antigen 24) (Ly-24) (Phagocytic glycoprotein 1) (PGP-1) (Phagocytic glycoprotein I) (PGP-I) (CD antigen CD44)	678411	2.64169e+07	38.9393	1.31664e+07	1.97962e+07	1.50354
P97493	THIOM	Txn2	Thioredoxin, mitochondrial (MTRX) (Mt-Trx) (Thioredoxin-2)	2.29506e+08	678411	0.00295596	1.14962e+08	1.72813e+08	1.50321
Q8BYM8	SYCM	Cars2	Probable cysteine--tRNA ligase, mitochondrial (EC 6.1.1.16) (Cysteinyl-tRNA synthetase) (CysRS)	1.99606e+07	2.23133e+07	1.11787	9.0413e+06	1.35875e+07	1.50283
P61967	AP1S1	Ap1s1	AP-1 complex subunit sigma-1A (Adaptor protein complex AP-1 subunit sigma-1A) (Adaptor-related protein complex 1 subunit sigma-1A) (Clathrin assembly protein complex 1 sigma-1A small chain) (Clathrin coat assembly protein AP19) (Golgi adaptor HA1/AP1 adaptin sigma-1A subunit) (HA1 19 kDa subunit) (Sigma 1a subunit of AP-1 clathrin) (Sigma-adaptin 1A) (Sigma1A-adaptin)	9.79923e+07	9.93114e+07	1.01346	7.5046e+07	1.12676e+08	1.50142
O35375	NRP2	Nrp2	Neuropilin-2 (Vascular endothelial cell growth factor 165 receptor 2)	3.7881e+07	5.28963e+07	1.39638	3.37089e+07	5.05842e+07	1.50062
P35282	RAB21	Rab21	Ras-related protein Rab-21 (Rab-12)	8.06265e+07	1.50154e+08	1.86234	1.63438e+08	2.45226e+08	1.50042
P59648	FXYD7	Fxyd7	FXYD domain-containing ion transport regulator 7	4.81341e+08	678411	0.00140942	4.22827e+08	6.34279e+08	1.50009
Q9D1J3	SARNP	Sarnp	SAP domain-containing ribonucleoprotein (Nuclear protein Hcc-1)	1.28262e+08	9.43869e+07	0.73589	1.29857e+08	1.94681e+08	1.4992
Q80U57	RIMS3	Rims3	Regulating synaptic membrane exocytosis protein 3 (Nim3) (RIM3 gamma) (Rab-3-interacting molecule 3) (RIM 3)	2.00295e+07	1.13808e+07	0.568202	1.06809e+07	1.59982e+07	1.49783
Q99J36	THUM1	Thumpd1	THUMP domain-containing protein 1	6.50884e+07	6.84214e+07	1.05121	5.50821e+07	8.24897e+07	1.49758
Q0VGB7	PP4R2	Ppp4r2	Serine/threonine-protein phosphatase 4 regulatory subunit 2	1.11221e+07	1.36009e+07	1.22288	1.11522e+07	1.66995e+07	1.49741
Q9Z2D3	GSDME	Gsdme	Gasdermin-E (Non-syndromic hearing impairment protein 5 homolog) [Cleaved into: Gasdermin-E, N-terminal (GSDME-NT); Gasdermin-E, C-terminal (GSDME-CT)]	2.58481e+07	2.65913e+07	1.02875	1.75593e+07	2.62762e+07	1.49642
Q64012	RALY	Raly	RNA-binding protein Raly (Maternally-expressed hnRNP C-related protein) (hnRNP associated with lethal yellow protein)	4.00847e+07	2.53501e+07	0.632412	3.23943e+07	4.84109e+07	1.49443
Q9CR86	CHSP1	Carhsp1	Calcium-regulated heat stable protein 1 (Calcium-regulated heat-stable protein of 24 kDa) (CRHSP-24)	5.20867e+07	9.63643e+07	1.85008	1.89769e+08	2.83427e+08	1.49354
Q9Z1F9	SAE2	Uba2	SUMO-activating enzyme subunit 2 (EC 2.3.2.-) (Anthracycline-associated resistance ARX) (Ubiquitin-like 1-activating enzyme E1B) (Ubiquitin-like modifier-activating enzyme 2)	9.62781e+07	1.08634e+08	1.12834	8.01032e+07	1.19516e+08	1.49202
P63080	GBRB3	Gabrb3	Gamma-aminobutyric acid receptor subunit beta-3 (GABA(A) receptor subunit beta-3)	2.03644e+08	1.699e+08	0.834296	1.05311e+08	1.57115e+08	1.49191
O08648	M3K4	Map3k4	Mitogen-activated protein kinase kinase kinase 4 (EC 2.7.11.25) (MAPK/ERK kinase kinase 4) (MEK kinase 4) (MEKK 4)	678411	9.88331e+06	14.5683	6.90558e+06	10283750	1.48919
B1AR13	CISD3	Cisd3	CDGSH iron-sulfur domain-containing protein 3, mitochondrial (Melanoma nuclear protein 13)	2.85052e+07	3.81535e+07	1.33848	7.1481e+07	1.06447e+08	1.48917
Q8CCT4	TCAL5	Tceal5	Transcription elongation factor A protein-like 5 (TCEA-like protein 5) (Transcription elongation factor S-II protein-like 5)	1.85901e+08	4.76912e+08	2.56541	2.99019e+07	4.45053e+07	1.48838
Q8BHE8	MAIP1	Maip1	m-AAA protease-interacting protein 1, mitochondrial (Matrix AAA peptidase-interacting protein 1)	4.38469e+08	3.08503e+08	0.703591	2.9764e+08	4.42821e+08	1.48777
O70400	PDLI1	Pdlim1	PDZ and LIM domain protein 1 (C-terminal LIM domain protein 1) (Elfin) (LIM domain protein CLP-36)	1.59107e+07	678411	0.0426386	1.2385e+07	1.84237e+07	1.48759
Q9QYR9	ACOT2	Acot2	Acyl-coenzyme A thioesterase 2, mitochondrial (Acyl-CoA thioesterase 2) (EC 3.1.2.2) (Acyl coenzyme A thioester hydrolase) (MTE-I) (Very-long-chain acyl-CoA thioesterase)	6.39891e+07	5.75845e+07	0.89991	3.70833e+07	5.51095e+07	1.4861
O70378	EMC8	Emc8	ER membrane protein complex subunit 8 (Neighbor of COX4)	2.49059e+07	5.87506e+07	2.3589	2.3102e+07	3.4328e+07	1.48593
Q8BV13	CSN7B	Cops7b	COP9 signalosome complex subunit 7b (SGN7b) (Signalosome subunit 7b) (JAB1-containing signalosome subunit 7b)	2.09815e+07	3.58525e+07	1.70877	1.95978e+07	2.91198e+07	1.48587
P50285	FMO1	Fmo1	Dimethylaniline monooxygenase [N-oxide-forming] 1 (EC 1.14.13.8) (Dimethylaniline oxidase 1) (Hepatic flavin-containing monooxygenase 1) (FMO 1)				1.1411e+07	1.69356e+07	1.48414
E9QAT4	SC16A	Sec16a	Protein transport protein Sec16A (SEC16 homolog A) (p250)	2.03307e+07	1.38852e+07	0.682967	1.5245e+07	2.26184e+07	1.48366
Q8BLY2	SYTC2	Tars3	Threonine--tRNA ligase 2, cytoplasmic (EC 6.1.1.3) (Threonyl-tRNA synthetase) (ThrRS) (Threonyl-tRNA synthetase protein 3)	8.12495e+07	5.35968e+07	0.659657	3.50605e+07	5.19222e+07	1.48093
Q9CQ25	MZT2	Mzt2	Mitotic-spindle organizing protein 2 (Mitotic-spindle organizing protein associated with a ring of gamma-tubulin 2B)	1.9619e+07	678411	0.0345792	1.5994e+07	2.36809e+07	1.48061
Q6ZPU9	KBP	Kifbp	KIF-binding protein (KIF1-binding protein)	5.14263e+07	5.81542e+07	1.13083	4.74014e+07	7.01306e+07	1.4795
Q9JL62	GLTP	Gltp	Glycolipid transfer protein (GLTP)	1.86909e+08	2.74132e+08	1.46666	1.76597e+08	2.60778e+08	1.47668
Q61337	BAD	Bad	Bcl2-associated agonist of cell death (BAD) (Bcl-2-binding component 6) (Bcl-xL/Bcl-2-associated death promoter) (Bcl2 antagonist of cell death)	678411	7.82725e+07	115.376	2.53052e+07	3.73661e+07	1.47662
Q9R060	NUBP1	Nubp1	Cytosolic Fe-S cluster assembly factor NUBP1 (Nucleotide-binding protein 1) (NBP 1)	1.35225e+07	9.08131e+06	0.671573	8.16478e+06	1.20487e+07	1.47569
Q920N7	SYT12	Syt12	Synaptotagmin-12 (Synaptotagmin XII) (SytXII)	6.30737e+07	80101973	1.26997	5.80351e+07	8.5533e+07	1.47381
Q62442	VAMP1	Vamp1	Vesicle-associated membrane protein 1 (VAMP-1) (Synaptobrevin-1)	2.27079e+08	2.84162e+08	1.25138	2.14827e+08	3.16609e+08	1.47379
P47955	RLA1	Rplp1	60S acidic ribosomal protein P1	8.91691e+08	1.46015e+09	1.63751	6.75375e+08	9.95223e+08	1.47359
Q9D1H6	NDUF4	Ndufaf4	NADH dehydrogenase [ubiquinone] 1 alpha subcomplex assembly factor 4 (Hormone-regulated proliferation-associated protein of 20 kDa homolog)	8.48331e+07	1.15177e+08	1.35769	6.19e+07	9.11235e+07	1.47211
Q99J45	NRBP	Nrbp1	Nuclear receptor-binding protein (HLS7-interacting protein kinase) (MLF1 adapter molecule)	7.4644e+07	6.67634e+07	0.894424	3.36752e+07	4.95666e+07	1.4719
Q925B0	PAWR	Pawr	PRKC apoptosis WT1 regulator protein (Prostate apoptosis response 4 protein) (Par-4)	678411	3.248e+06	4.78766	8.92927e+06	1.31209e+07	1.46943
D3YZI9	PGBD5	Pgbd5	PiggyBac transposable element-derived protein 5 (EC 3.1.-.-) (PiggyBac transposase 5)	5.33518e+07	5.32809e+07	0.998672	2.78503e+07	4.09153e+07	1.46912
Q9D8B3	CHM4B	Chmp4b	Charged multivesicular body protein 4b (Chromatin-modifying protein 4b) (CHMP4b)	2.06885e+08	1.95136e+08	0.94321	1.73713e+08	2.54516e+08	1.46516
Q61908	CMC4	Cmc4	Cx9C motif-containing protein 4 (Mature T-cell proliferation 1 neighbor protein) (Mature T-cell proliferation-1 type A) (MTCP-1 type A) (Protein p8 MTCP-1) (p8MTCP1)				2.12854e+07	3.1174e+07	1.46457
Q6PAR5	GAPD1	Gapvd1	GTPase-activating protein and VPS9 domain-containing protein 1 (GAPex-5) (Rab5-activating protein 6)	7.52068e+07	4.91639e+07	0.653717	3.01614e+07	4.41578e+07	1.46405
Q923G2	RPAB3	Polr2h	DNA-directed RNA polymerases I, II, and III subunit RPABC3 (RNA polymerases I, II, and III subunit ABC3) (DNA-directed RNA polymerase II subunit H) (RPB17) (RPB8 homolog)	3.48178e+07	7.07968e+06	0.203335	3.24202e+07	4.74422e+07	1.46335
P97770	THUM3	Thumpd3	THUMP domain-containing protein 3 (GtROSA26asSor)	1.65539e+06	2.06348e+07	12.4652	1.0028e+07	1.46712e+07	1.46302
Q9D958	SPCS1	Spcs1	Signal peptidase complex subunit 1 (EC 3.4.-.-) (Microsomal signal peptidase 12 kDa subunit) (SPase 12 kDa subunit)	9.39233e+07	5.59203e+07	0.595383	6.54095e+07	9.53813e+07	1.45822
Q9CZ30	OLA1	Ola1	Obg-like ATPase 1 (GTP-binding protein 9)	6.80609e+08	6.56139e+08	0.964048	5.33644e+08	7.77428e+08	1.45683
Q8C033	ARHGA	Arhgef10	Rho guanine nucleotide exchange factor 10				1.05023e+07	1.5288e+07	1.45569
P53994	RAB2A	Rab2a	Ras-related protein Rab-2A	1.11361e+09	1.06084e+09	0.952617	5.94241e+08	8.64995e+08	1.45563
P33175	KIF5A	Kif5a	Kinesin heavy chain isoform 5A (Kinesin heavy chain neuron-specific 1) (Neuronal kinesin heavy chain) (NKHC)	3.48758e+07	2.50919e+07	0.719464	9.19533e+06	1.33766e+07	1.45472
Q8K394	PLCL2	Plcl2	Inactive phospholipase C-like protein 2 (PLC-L(2)) (PLC-L2) (Phospholipase C-L2) (Phospholipase C-epsilon-2) (PLC-epsilon-2)	8.94881e+07	8.35834e+07	0.934018	7.12027e+07	1.03541e+08	1.45417
Q8BVG8	NAT14	Nat14	Probable N-acetyltransferase 14 (EC 2.3.1.-)	2.77454e+07	3.48178e+07	1.2549	2.83946e+07	4.12739e+07	1.45358
Q99MR0	ACL6B	Actl6b	Actin-like protein 6B (53 kDa BRG1-associated factor B) (Actin-related protein Baf53b) (ArpN-alpha) (ArpNa) (BRG1-associated factor 53B) (BAF53B)	8.53965e+07	6.88769e+07	0.806554	5.5429e+07	8.05524e+07	1.45325
P70698	PYRG1	Ctps1	CTP synthase 1 (EC 6.3.4.2) (CTP synthetase 1) (UTP--ammonia ligase 1)	4.05192e+07	3.06957e+07	0.757559	2.95947e+07	4.29946e+07	1.45278
Q8CIV8	TBCE	Tbce	Tubulin-specific chaperone E (Tubulin-folding cofactor E)	3.43136e+07	3.42811e+07	0.999053	2.11365e+08	3.06935e+08	1.45216
Q9ES56	TPPC4	Trappc4	Trafficking protein particle complex subunit 4 (Synbindin) (TRS23 homolog)	7.70604e+07	9.35307e+07	1.21373	5.66568e+07	8.22094e+07	1.45101
O88307	SORL	Sorl1	Sortilin-related receptor (Gp250) (Low-density lipoprotein receptor relative with 11 ligand-binding repeats) (LDLR relative with 11 ligand-binding repeats) (LR11) (SorLA-1) (Sorting protein-related receptor containing LDLR class A repeats) (mSorLA)	2.63341e+07	2.12598e+07	0.807311	1.31119e+07	1.89826e+07	1.44774
Q99PU8	DHX30	Dhx30	ATP-dependent RNA helicase DHX30 (EC 3.6.4.13) (DEAH box protein 30)	7.72922e+07	7.42895e+07	0.961151	1.78165e+07	2.57692e+07	1.44637
P70271	PDLI4	Pdlim4	PDZ and LIM domain protein 4 (LIM protein RIL) (Reversion-induced LIM protein)				1.7133e+07	2.47488e+07	1.44451
O88520	SHOC2	Shoc2	Leucine-rich repeat protein SHOC-2 (Protein soc-2 homolog) (Protein sur-8 homolog)	2.33478e+07	1.84944e+07	0.792126	2.3673e+07	3.41956e+07	1.4445
P70697	DCUP	Urod	Uroporphyrinogen decarboxylase (UPD) (URO-D) (EC 4.1.1.37)	3.80272e+07	4.82176e+07	1.26798	3.13962e+07	4.53377e+07	1.44405
Q6NXI6	RPRD2	Rprd2	Regulation of nuclear pre-mRNA domain-containing protein 2	678411	6.90046e+06	10.1715	4.15761e+06	6.00326e+06	1.44392
Q922H4	GMPPA	Gmppa	Mannose-1-phosphate guanyltransferase alpha (GDP-mannose pyrophosphorylase A) (GTP-mannose-1-phosphate guanylyltransferase alpha)	5.46897e+07	5.34601e+07	0.977517	3.47382e+07	5.00799e+07	1.44164
P12961	7B2	Scg5	Neuroendocrine protein 7B2 (Secretogranin V) (Secretogranin-5) (Secretory granule endocrine protein I) [Cleaved into: N-terminal peptide; C-terminal peptide]	2.88054e+07	2.9565e+07	1.02637	3.79896e+07	5.46516e+07	1.4386
Q63932	MP2K2	Map2k2	Dual specificity mitogen-activated protein kinase kinase 2 (MAP kinase kinase 2) (MAPKK 2) (EC 2.7.12.2) (ERK activator kinase 2) (MAPK/ERK kinase 2) (MEK 2)	1.01548e+08	6.40882e+07	0.631112	4.89366e+07	7.03201e+07	1.43696
Q9JIA7	SPHK2	Sphk2	Sphingosine kinase 2 (SK 2) (SPK 2) (EC 2.7.1.91)	4.45556e+07	4.01846e+07	0.901899	1.22676e+07	1.76126e+07	1.4357
Q9CPW4	ARPC5	Arpc5	Actin-related protein 2/3 complex subunit 5 (Arp2/3 complex 16 kDa subunit) (p16-ARC)	1.07852e+09	1.22953e+09	1.14002	6.69449e+08	9.60907e+08	1.43537
P70122	SBDS	Sbds	Ribosome maturation protein SBDS (Protein 22A3) (Shwachman-Bodian-Diamond syndrome protein homolog)	4.31477e+07	3.82681e+08	8.8691	2.37069e+07	3.39891e+07	1.43372
O35114	SCRB2	Scarb2	Lysosome membrane protein 2 (85 kDa lysosomal membrane sialoglycoprotein) (LGP85) (Lysosome membrane protein II) (LIMP II) (Scavenger receptor class B member 2)	1.01364e+08	1.00365e+08	0.990143	5.27363e+07	7.56009e+07	1.43356
P55772	ENTP1	Entpd1	Ectonucleoside triphosphate diphosphohydrolase 1 (NTPDase 1) (EC 3.6.1.5) (Ecto-ATP diphosphohydrolase 1) (Ecto-ATPDase 1) (Ecto-ATPase 1) (Ecto-apyrase) (Lymphoid cell activation antigen) (CD antigen CD39)	2.068e+07	1.50894e+07	0.729662	1.4403e+07	2.06445e+07	1.43335
Q99JW2	ACY1	Acy1	Aminoacylase-1 (ACY-1) (EC 3.5.1.14) (N-acyl-L-amino-acid amidohydrolase)	3.85801e+07	4.94324e+07	1.28129	4.00766e+07	5.74322e+07	1.43306
P04104	K2C1	Krt1	Keratin, type II cytoskeletal 1 (67 kDa cytokeratin) (Cytokeratin-1) (CK-1) (Keratin-1) (K1) (Type-II keratin Kb1)	1.6701e+08	678411	0.00406209	3.62092e+08	5.18679e+08	1.43245
O35188	X3CL1	Cx3cl1	Fractalkine (FK) (C-X3-C motif chemokine 1) (CX3C membrane-anchored chemokine) (Neurotactin) (Small-inducible cytokine D1) [Cleaved into: Processed fractalkine]	35782243	2.14707e+07	0.600039	1.04353e+07	1.49472e+07	1.43238
Q7TSG2	CTDP1	Ctdp1	RNA polymerase II subunit A C-terminal domain phosphatase (EC 3.1.3.16) (TFIIF-associating CTD phosphatase)				1.40761e+07	2.01567e+07	1.43198
Q922R1	PHAF1	Phaf1	Phagosome assembly factor 1	7.52604e+07	5.72222e+07	0.760323	4.83088e+07	69078200	1.42993
Q8CH72	TRI32	Trim32	E3 ubiquitin-protein ligase TRIM32 (EC 2.3.2.27) (RING-type E3 ubiquitin transferase TRIM32) (Tripartite motif-containing protein 32)	9.83729e+07	9.09967e+07	0.925018	5.10163e+07	7.28635e+07	1.42824
P11438	LAMP1	Lamp1	Lysosome-associated membrane glycoprotein 1 (LAMP-1) (Lysosome-associated membrane protein 1) (120 kDa lysosomal membrane glycoprotein) (CD107 antigen-like family member A) (LGP-120) (Lysosomal membrane glycoprotein A) (LGP-A) (P2B) (CD antigen CD107a)	1.02994e+08	9.39594e+07	0.912276	1.08845e+08	1.55429e+08	1.42798
Q9R1T2	SAE1	Sae1	SUMO-activating enzyme subunit 1 (Ubiquitin-like 1-activating enzyme E1A) [Cleaved into: SUMO-activating enzyme subunit 1, N-terminally processed]	1.36909e+08	1.38623e+08	1.01252	8.49871e+07	1.2128e+08	1.42704
Q9DCJ1	LST8	Mlst8	Target of rapamycin complex subunit LST8 (TORC subunit LST8) (G protein beta subunit-like) (Protein GbetaL) (Mammalian lethal with SEC13 protein 8) (mLST8)	2.67479e+07	1.32603e+07	0.49575	1.17526e+07	1.6764e+07	1.42641
P09470	ACE	Ace	Angiotensin-converting enzyme (ACE) (EC 3.2.1.-) (EC 3.4.15.1) (Dipeptidyl carboxypeptidase I) (Kininase II) (CD antigen CD143) [Cleaved into: Angiotensin-converting enzyme, soluble form]	9.96064e+07	2.049e+07	0.205709	9.68776e+07	1.38124e+08	1.42576
Q9Z239	PLM	Fxyd1	Phospholemman (FXYD domain-containing ion transport regulator 1) (Sodium/potassium-transporting ATPase subunit FXYD1)	4.17252e+08	3.57233e+08	0.856156	3.16093e+08	4.5055e+08	1.42537
Q8VD75	HIP1	Hip1	Huntingtin-interacting protein 1 (HIP-1) (Huntingtin-interacting protein I) (HIP-I)	2.7677e+07	3.64735e+07	1.31783	2.05984e+07	2.936e+07	1.42536
Q811S7	UBIP1	Ubp1	Upstream-binding protein 1 (Nuclear factor 2d9) (NF2d9)	678411	1.51763e+07	22.3703	6.40184e+06	9.12093e+06	1.42474
Q05D44	IF2P	Eif5b	Eukaryotic translation initiation factor 5B (eIF-5B) (EC 3.6.5.3) (Translation initiation factor IF-2)	6.61274e+07	6.83755e+07	1.034	2.22945e+07	3.17235e+07	1.42293
Q9CYN9	RENR	Atp6ap2	Renin receptor (ATPase H(+)-transporting lysosomal accessory protein 2) (ATPase H(+)-transporting lysosomal-interacting protein 2) (Renin/prorenin receptor) [Cleaved into: Renin receptor extracellular fragment; Renin receptor cytoplasmic fragment]	2.34935e+08	2.26278e+08	0.96315	1.98522e+08	2.82339e+08	1.42221
Q91V76	CK054		Ester hydrolase C11orf54 homolog (EC 3.1.-.-)	5.83069e+07	5.99632e+07	1.02841	7.63223e+07	1.08532e+08	1.42202
P63321	RALA	Rala	Ras-related protein Ral-A (EC 3.6.5.2)	7.6802e+08	9.14906e+08	1.19125	3.38162e+08	4.80605e+08	1.42123
O35604	NPC1	Npc1	NPC intracellular cholesterol transporter 1 (Niemann-Pick C1 protein)	1.19398e+07	1.03193e+07	0.864284	1.26479e+07	1.79653e+07	1.42041
P51655	GPC4	Gpc4	Glypican-4 (K-glypican) [Cleaved into: Secreted glypican-4]	1.22656e+08	1.08939e+08	0.888162	6.37274e+07	9.04779e+07	1.41976
Q9ESN9	JIP3	Mapk8ip3	C-Jun-amino-terminal kinase-interacting protein 3 (JIP-3) (JNK-interacting protein 3) (JNK MAP kinase scaffold protein 3) (JNK/SAPK-associated protein 1) (JSAP1) (Mitogen-activated protein kinase 8-interacting protein 3) (Sunday driver 2)	5.02977e+07	6.33622e+07	1.25974	4.10323e+07	5.82517e+07	1.41965
Q64378	FKBP5	Fkbp5	Peptidyl-prolyl cis-trans isomerase FKBP5 (PPIase FKBP5) (EC 5.2.1.8) (51 kDa FK506-binding protein) (51 kDa FKBP) (FKBP-51) (FK506-binding protein 5) (FKBP-5) (Rotamase)	4.52488e+07	2.53207e+07	0.559588	4.31656e+07	6.12563e+07	1.4191
P14602	HSPB1	Hspb1	Heat shock protein beta-1 (HspB1) (Growth-related 25 kDa protein) (Heat shock 25 kDa protein) (HSP 25) (Heat shock 27 kDa protein) (HSP 27) (p25)	4.78866e+07	5.41396e+07	1.13058	7.66232e+07	1.08687e+08	1.41847
Q3ZK22	VEZA	Vezt	Vezatin	5.02558e+06	8.97047e+06	1.78496	2.30537e+06	3.2699e+06	1.41838
Q9R190	MTA2	Mta2	Metastasis-associated protein MTA2 (Metastasis-associated 1-like 1)	3.25085e+07	3.12497e+07	0.961279	2.51569e+07	3.56709e+07	1.41793
Q5KU39	VPS41	Vps41	Vacuolar protein sorting-associated protein 41 homolog (VAM2 homolog) (mVAM2)	1.54201e+07	1.06551e+07	0.690989	1.61783e+07	2.29283e+07	1.41723
Q9D892	ITPA	Itpa	Inosine triphosphate pyrophosphatase (ITPase) (Inosine triphosphatase) (EC 3.6.1.9) (Non-canonical purine NTP pyrophosphatase) (Non-standard purine NTP pyrophosphatase) (Nucleoside-triphosphate diphosphatase) (Nucleoside-triphosphate pyrophosphatase) (NTPase)	4.8608e+08	4.4479e+08	0.915054	3.21713e+08	4.55087e+08	1.41458
Q8K4Z0	LGI2	Lgi2	Leucine-rich repeat LGI family member 2 (Leucine-rich glioma-inactivated protein 2)	9.94684e+06	1.20888e+07	1.21535	1.92249e+07	2.71784e+07	1.41371
Q9D061	ACBD6	Acbd6	Acyl-CoA-binding domain-containing protein 6	6.196e+07	6.45565e+07	1.04191	4.8497e+07	6.85592e+07	1.41368
P09813	APOA2	Apoa2	Apolipoprotein A-II (Apo-AII) (ApoA-II) (Apolipoprotein A2) [Cleaved into: Proapolipoprotein A-II (ProapoA-II)]	2.82361e+07	678411	0.0240264	2.4079e+07	3.40329e+07	1.41338
Q8BJI1	S6A17	Slc6a17	Sodium-dependent neutral amino acid transporter SLC6A17 (Sodium-dependent neurotransmitter transporter NTT4) (Solute carrier family 6 member 17)	3.50665e+08	3.13048e+08	0.892727	2.63208e+08	3.71546e+08	1.41161
Q9JKD3	SCAM5	Scamp5	Secretory carrier-associated membrane protein 5 (Secretory carrier membrane protein 5)	7.40544e+07	2.13354e+08	2.88104	6.36965e+08	8.99024e+08	1.41142
O55057	PDE6D	Pde6d	Retinal rod rhodopsin-sensitive cGMP 3',5'-cyclic phosphodiesterase subunit delta (GMP-PDE delta)	4.55078e+07	5.43901e+07	1.19518	5.41472e+07	76337466	1.40981
Q9CZY3	UB2V1	Ube2v1	Ubiquitin-conjugating enzyme E2 variant 1 (UEV-1) (CROC-1)	1.01324e+08	7.31926e+07	0.722363	9.03044e+07	1.27262e+08	1.40925
Q78IQ7	S39A4	Slc39a4	Zinc transporter ZIP4 (Activated in W/Wv mouse stomach 2) (mAWMS2) (Solute carrier family 39 member 4) (Zrt- and Irt-like protein 4) (ZIP-4)				2.60511e+06	3.67039e+06	1.40892
Q8K1A6	C2D1A	Cc2d1a	Coiled-coil and C2 domain-containing protein 1A (Five prime repressor element under dual repression-binding protein 1) (FRE under dual repression-binding protein 1) (Freud-1)	3.65062e+07	4.41357e+07	1.20899	2.65366e+07	3.73471e+07	1.40738
O08810	U5S1	Eftud2	116 kDa U5 small nuclear ribonucleoprotein component (Elongation factor Tu GTP-binding domain-containing protein 2) (U5 snRNP-specific protein, 116 kDa) (U5-116 kDa)	9.71819e+07	7.27178e+07	0.748265	5.35917e+07	7.53321e+07	1.40567
Q9WTU3	SCN8A	Scn8a	Sodium channel protein type 8 subunit alpha (Sodium channel protein type VIII subunit alpha) (Voltage-gated sodium channel subunit alpha Nav1.6)	2.6321e+07	2.29586e+07	0.872254	4.68372e+07	6.57164e+07	1.40308
Q8R0P4	AAMDC	Aamdc	Mth938 domain-containing protein (LI2)	9.55637e+07	1.26415e+08	1.32284	8.96202e+07	1.25525e+08	1.40063
P55302	AMRP	Lrpap1	Alpha-2-macroglobulin receptor-associated protein (Alpha-2-MRAP) (Heparin-binding protein 44) (HBP-44) (Low density lipoprotein receptor-related protein-associated protein 1) (RAP)	3.331e+07	4.0307e+07	1.21006	5.00651e+07	7.01034e+07	1.40025
P84086	CPLX2	Cplx2	Complexin-2 (921-L) (Complexin II) (CPX II) (Synaphin-1)	2.90493e+09	2.5482e+09	0.877198	2.23997e+09	3.13632e+09	1.40016
Q3V1L4	5NTC	Nt5c2	Cytosolic purine 5'-nucleotidase (EC 3.1.3.5) (Cytosolic 5'-nucleotidase II)	5.7969e+07	9.48098e+07	1.63552	5.38427e+07	7.53873e+07	1.40014
Q8K298	ANLN	Anln	Anillin	3.9978e+07	8.4139e+07	2.10464	7.49096e+07	1.04759e+08	1.39847
Q8BZ60	STON2	Ston2	Stonin-2 (Stoned B)	1.0925e+07	1.48126e+07	1.35584	6.34244e+06	8.86721e+06	1.39808
P50428	ARSA	Arsa	Arylsulfatase A (ASA) (EC 3.1.6.8) (Cerebroside-sulfatase)	6.64247e+07	4.83538e+07	0.72795	4.31509e+07	6.02422e+07	1.39608
P97467	AMD	Pam	Peptidyl-glycine alpha-amidating monooxygenase (PAM) [Includes: Peptidylglycine alpha-hydroxylating monooxygenase (PHM) (EC 1.14.17.3); Peptidyl-alpha-hydroxyglycine alpha-amidating lyase (EC 4.3.2.5) (Peptidylamidoglycolate lyase) (PAL)]	5.37835e+07	4.16395e+07	0.774206	4.73151e+07	6.59908e+07	1.39471
Q91VH6	MEMO1	Memo1	Protein MEMO1 (Mediator of ErbB2-driven cell motility 1) (Memo-1)	3.26238e+07	2.64637e+07	0.811177	2.63832e+07	3.67887e+07	1.3944
P59108	CPNE2	Cpne2	Copine-2 (Copine II)	2.12821e+07	2.15094e+07	1.01068	1.97118e+08	2.74713e+08	1.39365
P51906	EAA3	Slc1a1	Excitatory amino acid transporter 3 (Excitatory amino-acid carrier 1) (Sodium-dependent glutamate/aspartate transporter 3) (Solute carrier family 1 member 1)	8.6066e+07	81194106	0.943394	5.85712e+07	81615515	1.39344
P80560	PTPR2	Ptprn2	Receptor-type tyrosine-protein phosphatase N2 (R-PTP-N2) (EC 3.1.3.-) (EC 3.1.3.48) (PTP IA-2beta) (Phogrin) (Protein tyrosine phosphatase-NP) (PTP-NP) [Cleaved into: IA-2beta71; IA-2beta64; IA-2beta60]	4.50824e+07	5.51657e+07	1.22367	3.53395e+07	4.92169e+07	1.39269
P14106	C1QB	C1qb	Complement C1q subcomponent subunit B	215386525	3.36986e+08	1.56456	1.67081e+08	2.32433e+08	1.39114
Q9CZW4	ACSL3	Acsl3	Fatty acid CoA ligase Acsl3 (Arachidonate--CoA ligase) (EC 6.2.1.15) (Long-chain acyl-CoA synthetase 3) (LACS 3) (Long-chain-fatty-acid--CoA ligase 3) (EC 6.2.1.3) (Medium-chain acyl-CoA ligase Acsl3) (EC 6.2.1.2)	8.86663e+07	9.61795e+07	1.08474	6.67422e+07	9.28352e+07	1.39095
P97930	KTHY	Dtymk	Thymidylate kinase (EC 2.7.4.9) (dTMP kinase)				2.23525e+07	3.10904e+07	1.39092
P16283	B3A3	Slc4a3	Anion exchange protein 3 (AE 3) (Anion exchanger 3) (Neuronal band 3-like protein) (Solute carrier family 4 member 3)	2.79536e+07	3.17187e+07	1.13469	2.35449e+07	3.27159e+07	1.38951
Q9Z0R4	ITSN1	Itsn1	Intersectin-1 (EH and SH3 domains protein 1)	1.81472e+08	1.34463e+08	0.74096	9.31339e+07	1.29394e+08	1.38934
Q9D289	TPC6B	Trappc6b	Trafficking protein particle complex subunit 6B (TRAPP complex subunit 6B)	4.32326e+07	5.37835e+07	1.24405	2.96239e+07	4.11344e+07	1.38855
Q9D6G9	CKLF5	Cmtm5	CKLF-like MARVEL transmembrane domain-containing protein 5 (Chemokine-like factor superfamily member 5)	1.00365e+08	2.4218e+08	2.41299	1.45038e+08	2.01303e+08	1.38793
P60761	NEUG	Nrgn	Neurogranin (Ng) (RC3) [Cleaved into: NEUG(55-78)]	1.86432e+09	1.2169e+09	0.652733	1.69937e+09	2352810565	1.38452
Q71M36	CSPG5	Cspg5	Chondroitin sulfate proteoglycan 5 (Acidic leucine-rich EGF-like domain-containing brain protein) (Neuroglycan C)	2.60657e+08	2.41184e+08	0.925293	4.0067e+08	5.53425e+08	1.38125
Q61029	LAP2B	Tmpo	Lamina-associated polypeptide 2, isoforms beta/delta/epsilon/gamma (Thymopoietin isoforms beta/delta/epsilon/gamma) (TP beta/delta/epsilon/gamma)	7.23284e+07	6.99317e+07	0.966863	1.10358e+08	1.5243e+08	1.38124
P48428	TBCA	Tbca	Tubulin-specific chaperone A (TCP1-chaperonin cofactor A) (Tubulin-folding cofactor A) (CFA)	1.2588e+08	1.4807e+08	1.17628	4.51997e+07	6.23576e+07	1.3796
O70311	NMT2	Nmt2	Glycylpeptide N-tetradecanoyltransferase 2 (EC 2.3.1.97) (Myristoyl-CoA:protein N-myristoyltransferase 2) (NMT 2) (Peptide N-myristoyltransferase 2) (Type II N-myristoyltransferase)	4.30844e+07	5.63509e+07	1.30792	2.73126e+07	3.76793e+07	1.37955
P70445	4EBP2	Eif4ebp2	Eukaryotic translation initiation factor 4E-binding protein 2 (4E-BP2) (eIF4E-binding protein 2) (Phosphorylated heat- and acid-stable protein regulated by insulin 2) (PHAS-II)	678411	6.37696e+07	93.9985	1.15485e+07	1.59282e+07	1.37925
O88454	KCNK4	Kcnk4	Potassium channel subfamily K member 4 (TWIK-related arachidonic acid-stimulated potassium channel protein) (TRAAK)	7.07968e+06	8.59844e+06	1.21452	8.83568e+06	1.21861e+07	1.3792
Q9CYR6	AGM1	Pgm3	Phosphoacetylglucosamine mutase (PAGM) (EC 5.4.2.3) (Acetylglucosamine phosphomutase) (N-acetylglucosamine-phosphate mutase) (Phosphoglucomutase-3) (PGM 3)	8.30097e+07	8.15355e+07	0.982241	5.94377e+07	8.19683e+07	1.37906
Q8N7N5	DCAF8	Dcaf8	DDB1- and CUL4-associated factor 8 (WD repeat-containing protein 42A)	6.50508e+06	1.19398e+07	1.83545	1.92205e+07	2.65015e+07	1.37881
O09061	PSB1	Psmb1	Proteasome subunit beta type-1 (Macropain subunit C5) (Multicatalytic endopeptidase complex subunit C5) (Proteasome component C5) (Proteasome gamma chain)	4.36243e+08	357980264	0.820598	3.25694e+08	4.48785e+08	1.37794
P97445	CAC1A	Cacna1a	Voltage-dependent P/Q-type calcium channel subunit alpha-1A (Brain calcium channel I) (BI) (Calcium channel, L type, alpha-1 polypeptide isoform 4) (Voltage-gated calcium channel subunit alpha Cav2.1)	5.18699e+07	37297872	0.719065	3.28741e+07	4.5231e+07	1.37588
O35127	C10	Grcc10	Protein C10	1.0549e+08	6.61274e+07	0.626859	5.51095e+07	7.58204e+07	1.37581
Q8BR63	F177A	Fam177a1	Protein FAM177A1	9.16213e+07	1.47959e+08	1.6149	1.28813e+08	1.77197e+08	1.37562
Q3UV70	PDP1	Pdp1	[Pyruvate dehydrogenase [acetyl-transferring]]-phosphatase 1, mitochondrial (PDP 1) (EC 3.1.3.43) (Protein phosphatase 2C) (Pyruvate dehydrogenase phosphatase catalytic subunit 1) (PDPC 1)	2.60123e+07	4.80033e+07	1.84541	1.65647e+07	2.27826e+07	1.37537
Q8BTR5	DUS28	Dusp28	Dual specificity phosphatase 28 (EC 3.1.3.16) (EC 3.1.3.48)	2.66504e+06	678411	0.254559	1.1623e+07	1.59699e+07	1.37399
O35988	SDC4	Sdc4	Syndecan-4 (SYND4) (Ryudocan core protein)	7.35172e+07	9.69786e+07	1.31913	7.96099e+07	1.09364e+08	1.37375
P62317	SMD2	Snrpd2	Small nuclear ribonucleoprotein Sm D2 (Sm-D2) (snRNP core protein D2)	2.45517e+08	2.22688e+08	0.907018	2.04251e+08	2.80372e+08	1.37268
Q8R4U7	LUZP1	Luzp1	Leucine zipper protein 1 (Leucine zipper motif-containing protein)	3.84737e+07	4.39756e+07	1.14301	2.79602e+07	3.83522e+07	1.37167
P16054	KPCE	Prkce	Protein kinase C epsilon type (EC 2.7.11.13) (nPKC-epsilon)	7.76505e+08	7.2905e+08	0.938887	4.28578e+08	5.87548e+08	1.37093
Q80Y17	L2GL1	Llgl1	Lethal(2) giant larvae protein homolog 1 (LLGL) (Mgl-1) (Mlgl)	8.63702e+07	9.57023e+07	1.10805	6.4278e+07	8.81174e+07	1.37088
Q8C4X2	KC1G3	Csnk1g3	Casein kinase I isoform gamma-3 (CKI-gamma 3) (EC 2.7.11.1)	1.91549e+07	3.22221e+07	1.68218	3.14043e+07	4.30291e+07	1.37017
Q8K2L8	TPC12	Trappc12	Trafficking protein particle complex subunit 12 (Tetratricopeptide repeat protein 15) (TPR repeat protein 15)	2.08223e+07	1.806e+07	0.867339	2.84031e+07	3.89073e+07	1.36982
P17918	PCNA	Pcna	Proliferating cell nuclear antigen (PCNA) (Cyclin)	678411	5.02558e+06	7.40787	1.09542e+07	1.49987e+07	1.36922
Q80YX1	TENA	Tnc	Tenascin (TN) (Hexabrachion) (Tenascin-C) (TN-C)	1.28771e+07	2.07486e+07	1.61128	8.39845e+06	1.14915e+07	1.36829
Q9R061	NUBP2	Nubp2	Cytosolic Fe-S cluster assembly factor NUBP2 (Nucleotide-binding protein 2) (NBP 2)	678411	1.38037e+07	20.3471	6.82814e+06	9.33917e+06	1.36775
Q8BMA6	SRP68	Srp68	Signal recognition particle subunit SRP68 (SRP68) (Signal recognition particle 68 kDa protein)	3.57173e+07	2.79536e+07	0.782636	2.2997e+07	3.14407e+07	1.36717
Q9D7I5	LHPP	Lhpp	Phospholysine phosphohistidine inorganic pyrophosphate phosphatase (EC 3.1.3.-) (EC 3.6.1.1)	5.39071e+07	6.69824e+07	1.24255	4.83565e+07	6.60559e+07	1.36602
Q8K0D0	CDK17	Cdk17	Cyclin-dependent kinase 17 (EC 2.7.11.22) (Cell division protein kinase 17) (PCTAIRE-motif protein kinase 2) (Serine/threonine-protein kinase PCTAIRE-2)	1.68812e+07	7.84305e+06	0.464602	1.6927e+07	2.30954e+07	1.36442
Q80UK0	SESD1	Sestd1	SEC14 domain and spectrin repeat-containing protein 1 (Huntingtin-interacting protein-like protein)	3.34644e+07	4.29937e+07	1.28476	1.78234e+07	2.43151e+07	1.36423
P23780	BGAL	Glb1	Beta-galactosidase (EC 3.2.1.23) (Acid beta-galactosidase) (Lactase)	2.65388e+07	2.17666e+07	0.820177	2.94683e+07	4.02012e+07	1.36422
Q9D1E6	TBCB	Tbcb	Tubulin-folding cofactor B (Cytoskeleton-associated protein 1) (Cytoskeleton-associated protein CKAPI) (Tubulin-specific chaperone B)	2.56721e+07	1.02986e+08	4.0116	7.49613e+07	1.02248e+08	1.36402
Q8R2U0	SEH1	Seh1l	Nucleoporin SEH1 (GATOR complex protein SEH1) (Nup107-160 subcomplex subunit SEH1)	4.88181e+07	4.17837e+07	0.855905	3.14523e+07	4.28248e+07	1.36158
O55137	ACOT1	Acot1	Acyl-coenzyme A thioesterase 1 (Acyl-CoA thioesterase 1) (EC 3.1.2.-) (CTE-I) (Inducible cytosolic acyl-coenzyme A thioester hydrolase) (Long chain acyl-CoA thioester hydrolase) (Long chain acyl-CoA hydrolase) (Palmitoyl-coenzyme A thioesterase) (EC 3.1.2.2)	5.27701e+07	4.57543e+07	0.86705	5.83567e+07	7.9278e+07	1.35851
Q6IR34	GPSM1	Gpsm1	G-protein-signaling modulator 1 (Activator of G-protein signaling 3)	678411	1.2689e+07	18.704	1.41548e+07	1.92267e+07	1.35832
Q9EPL2	CSTN1	Clstn1	Calsyntenin-1 (Alcadein-alpha) (Alc-alpha) [Cleaved into: Soluble Alc-alpha (SAlc-alpha); CTF1-alpha (C-terminal fragment 1-alpha)]	4.67098e+07	7.22192e+07	1.54613	5.44297e+07	7.39099e+07	1.3579
Q9QYX7	PCLO	Pclo	Protein piccolo (Aczonin) (Brain-derived HLMN protein) (Multidomain presynaptic cytomatrix protein)	3.85879e+08	3.50521e+08	0.908372	2.4154e+08	3.27718e+08	1.35678
Q3UH99	SHSA6	Shisa6	Protein shisa-6 (Cystine-knot AMPAR modulating protein of 52 kDa) (CKAMP52) (Shisa family member 6)	1.20767e+08	1.20945e+08	1.00148	7.60928e+07	1.03212e+08	1.35639
Q3UVX5	GRM5	Grm5	Metabotropic glutamate receptor 5 (mGluR5)	1.90106e+08	1.43584e+08	0.755283	1.57284e+08	2.13212e+08	1.35558
Q61730	IL1AP	Il1rap	Interleukin-1 receptor accessory protein (IL-1 receptor accessory protein) (IL-1RAcP) (EC 3.2.2.6) (Interleukin-33 receptot beta chain)	1.33662e+07	2.16436e+07	1.61928	2.49864e+07	3.38711e+07	1.35558
Q62148	AL1A2	Aldh1a2	Retinal dehydrogenase 2 (RALDH 2) (RalDH2) (EC 1.2.1.36) (Aldehyde dehydrogenase family 1 member A2) (Retinaldehyde-specific dehydrogenase type 2) (RALDH(II))	1.973e+07	678411	0.0343847	2.30196e+07	3.11911e+07	1.35498
Q8BFU3	RN214	Rnf214	RING finger protein 214	6.34183e+07	7.76364e+07	1.2242	4.74253e+07	6.41721e+07	1.35312
Q8BMP6	GCP60	Acbd3	Golgi resident protein GCP60 (Acyl-CoA-binding domain-containing protein 3) (Golgi complex-associated protein 1) (GOCAP1) (Golgi phosphoprotein 1) (GOLPH1) (PBR- and PKA-associated protein 7) (Peripheral benzodiazepine receptor-associated protein PAP7)	2.86386e+07	2.97936e+07	1.04033	1.39786e+07	1.89123e+07	1.35295
P81122	IRS2	Irs2	Insulin receptor substrate 2 (IRS-2) (4PS)	5.46516e+06	7.61276e+06	1.39296	3.75516e+06	5.07521e+06	1.35153
P28028	BRAF	Braf	Serine/threonine-protein kinase B-raf (EC 2.7.11.1) (Proto-oncogene B-Raf)	1.28055e+08	1.25201e+08	0.977712	8.13171e+07	1.09899e+08	1.35149
Q9D7X8	GGCT	Ggct	Gamma-glutamylcyclotransferase (EC 4.3.2.9)	5.46039e+07	678411	0.0124242	8.88208e+07	1.19978e+08	1.35079
Q8BTJ4	ENPP4	Enpp4	Bis(5'-adenosyl)-triphosphatase enpp4 (EC 3.6.1.29) (AP3A hydrolase) (AP3Aase) (Ectonucleotide pyrophosphatase/phosphodiesterase family member 4) (E-NPP 4) (NPP-4)	1.22267e+07	1.26494e+07	1.03457	1.87237e+07	2.52821e+07	1.35027
P0C913	OCC1		Overexpressed in colon carcinoma 1 protein homolog (OCC-1)	2.68162e+07	2.47193e+07	0.921805	2.67983e+07	3.61664e+07	1.34958
Q99LD8	DDAH2	Ddah2	N(G),N(G)-dimethylarginine dimethylaminohydrolase 2 (DDAH-2) (Dimethylarginine dimethylaminohydrolase 2) (EC 3.5.3.18) (DDAHII) (Dimethylargininase-2)	8.41106e+07	6.59187e+07	0.783715	5.25026e+07	7.08266e+07	1.34901
P63276	RS17	Rps17	40S ribosomal protein S17	4.15381e+08	4.02503e+08	0.968997	2.13496e+08	2.87939e+08	1.34869
Q80Y56	RBNS5	Rbsn	Rabenosyn-5 (FYVE finger-containing Rab5 effector protein rabenosyn-5) (RAB effector RBSN) (Zinc finger FYVE domain-containing protein 20)	1.13861e+07	1.78143e+07	1.56456	1.48579e+07	2.00312e+07	1.34819
Q9QYJ3	DNJB1	Dnajb1	DnaJ homolog subfamily B member 1 (Heat shock 40 kDa protein 1) (HSP40) (Heat shock protein 40)	5.76309e+07	6.82517e+07	1.18429	6.04786e+07	8.15207e+07	1.34793
O08576	RUN3A	Rundc3a	RUN domain-containing protein 3A (Rap2-interacting protein 8) (RPIP-8)	1.63933e+08	1.95374e+08	1.1918	1.45989e+07	1.96755e+07	1.34774
P63054	PCP4	Pcp4	Calmodulin regulator protein PCP4 (Brain-specific antigen PCP-4) (Brain-specific polypeptide PEP-19) (Purkinje cell protein 4)	1.53307e+08	1.88464e+08	1.22933	4.7864e+08	6.45036e+08	1.34765
P04925	PRIO	Prnp	Major prion protein (PrP) (PrP27-30) (PrP33-35C) (CD antigen CD230)	3.23451e+08	4.67086e+08	1.44407	3.10313e+08	4.17584e+08	1.34569
P11835	ITB2	Itgb2	Integrin beta-2 (Cell surface adhesion glycoproteins LFA-1/CR3/p150,95 subunit beta) (Complement receptor C3 subunit beta) (CD antigen CD18)	8.33043e+06	1.8891e+07	2.26771	1.30488e+07	1.75593e+07	1.34566
Q6PHS9	CA2D2	Cacna2d2	Voltage-dependent calcium channel subunit alpha-2/delta-2 (Protein ducky) (Voltage-gated calcium channel subunit alpha-2/delta-2) [Cleaved into: Voltage-dependent calcium channel subunit alpha-2-2; Voltage-dependent calcium channel subunit delta-2]	1.21304e+07	2.64304e+07	2.17885	3.207e+07	4.31451e+07	1.34534
Q3U3E2	F117B	Fam117b	Protein FAM117B (Amyotrophic lateral sclerosis 2 chromosomal region candidate gene 13 protein homolog)	678411	6.41622e+06	9.45771	5.2585e+06	7066992	1.34392
P43406	ITAV	Itgav	Integrin alpha-V (Vitronectin receptor subunit alpha) (CD antigen CD51) [Cleaved into: Integrin alpha-V heavy chain; Integrin alpha-V light chain]	6.76904e+07	7.13536e+07	1.05412	6.35327e+07	8.53727e+07	1.34376
Q9QZE7	TSNAX	Tsnax	Translin-associated protein X (Translin-associated factor X)	1.0281e+08	8.63702e+07	0.840093	1.00705e+08	1.35286e+08	1.34338
Q9JIK9	RT34	Mrps34	28S ribosomal protein S34, mitochondrial (MRP-S34) (S34mt) (T-complex expressed gene 2 protein)	2.32718e+07	2.3263e+07	0.999623	1.61386e+07	2.16707e+07	1.34279
Q8BJH1	ZC21A	Zc2hc1a	Zinc finger C2HC domain-containing protein 1A	8.38468e+07	8.14064e+07	0.970895	9.88703e+07	1.32736e+08	1.34253
Q61599	GDIR2	Arhgdib	Rho GDP-dissociation inhibitor 2 (Rho GDI 2) (D4) (Rho-GDI beta)	4.13609e+07	3.92437e+07	0.948813	3.83522e+07	5.14819e+07	1.34234
Q9DB72	BTBDH	Btbd17	BTB/POZ domain-containing protein 17 (Galectin-3-binding protein-like)	7.12045e+07	9.95394e+07	1.39794	4.7955e+07	6.4349e+07	1.34186
Q99LG2	TNPO2	Tnpo2	Transportin-2 (Karyopherin beta-2b)	1.47104e+08	1.46113e+08	0.993263	8.47053e+07	1.13488e+08	1.3398
Q3UHX2	HAP28	Pdap1	28 kDa heat- and acid-stable phosphoprotein (PDGF-associated protein) (PAP) (PDGFA-associated protein 1) (PAP1)	1.26099e+08	1.39737e+08	1.10815	1.50484e+08	2.01606e+08	1.33972
Q8BHB9	CLIC6	Clic6	Chloride intracellular channel protein 6	1.22909e+08	1.68147e+07	0.136807	8.76072e+07	1.17334e+08	1.33932
Q9CR51	VATG1	Atp6v1g1	V-type proton ATPase subunit G 1 (V-ATPase subunit G 1) (V-ATPase 13 kDa subunit 1) (Vacuolar proton pump subunit G 1)	4.41906e+08	4.27717e+08	0.96789	3.56116e+08	4.76856e+08	1.33905
P35505	FAAA	Fah	Fumarylacetoacetase (FAA) (EC 3.7.1.2) (Beta-diketonase) (Fumarylacetoacetate hydrolase)	1.66503e+08	1.35715e+08	0.815093	1.55293e+08	2.07847e+08	1.33842
Q9QZQ1	AFAD	Afdn	Afadin (Afadin adherens junction formation factor) (Protein Af-6)	6.8007e+07	9.34084e+07	1.37351	5.36859e+07	7.18373e+07	1.3381
Q922J3	CLIP1	Clip1	CAP-Gly domain-containing linker protein 1 (Cytoplasmic linker protein 170) (CLIP-170) (Restin)	1.27858e+08	7.6709e+07	0.599955	7.47617e+07	1.0002e+08	1.33785
Q9R069	BCAM	Bcam	Basal cell adhesion molecule (B-CAM cell surface glycoprotein) (Lutheran antigen) (CD antigen CD239)	4.08402e+07	2.96099e+07	0.725019	3.23251e+07	4.32386e+07	1.33762
Q62178	SEM4A	Sema4a	Semaphorin-4A (Semaphorin-B) (Sema B)	8574899	678411	0.0791159	6.41703e+06	8.5824e+06	1.33744
Q61081	CDC37	Cdc37	Hsp90 co-chaperone Cdc37 (Hsp90 chaperone protein kinase-targeting subunit) (p50Cdc37) [Cleaved into: Hsp90 co-chaperone Cdc37, N-terminally processed]	3.71089e+08	5.04989e+08	1.36083	2.80739e+08	3.75448e+08	1.33735
Q8BGE6	ATG4B	Atg4b	Cysteine protease ATG4B (EC 3.4.22.-) (AUT-like 1 cysteine endopeptidase) (Autophagin-1) (Autophagy-related cysteine endopeptidase 1) (Autophagy-related protein 4 homolog B)	3.58044e+07	3.54457e+07	0.989982	2.42113e+07	3.23251e+07	1.33512
P59326	YTHD1	Ythdf1	YTH domain-containing family protein 1 (Dermatomyositis associated with cancer putative autoantigen 1 homolog) (DACA-1 homolog)				1.67335e+07	2.23404e+07	1.33507
Q60714	S27A1	Slc27a1	Long-chain fatty acid transport protein 1 (FATP-1) (Fatty acid transport protein 1) (EC 6.2.1.15) (Fatty acid transport protein) (Solute carrier family 27 member 1)	8.43674e+07	7.0185e+07	0.831896	53000012	7.06359e+07	1.33275
P70288	HDAC2	Hdac2	Histone deacetylase 2 (HD2) (EC 3.5.1.98) (YY1 transcription factor-binding protein)	4.19786e+07	9.26208e+07	2.20638	3.89073e+07	5.18418e+07	1.33245
O55026	ENTP2	Entpd2	Ectonucleoside triphosphate diphosphohydrolase 2 (NTPDase 2) (EC 3.6.1.-) (CD39 antigen-like 1) (Ecto-ATP diphosphohydrolase 2) (Ecto-ATPDase 2) (Ecto-ATPase 2)	1.04605e+08	9.89128e+07	0.945583	1.06371e+08	1.41681e+08	1.33195
Q6DFV7	NCOA7	Ncoa7	Nuclear receptor coactivator 7	2.46884e+07	2.65318e+07	1.07467	1.21953e+07	1.62428e+07	1.33189
Q4KMM3	OXR1	Oxr1	Oxidation resistance protein 1 (Protein C7)	5.29911e+08	9.00368e+08	1.69909	5.14758e+08	6.85497e+08	1.33169
P97772	GRM1	Grm1	Metabotropic glutamate receptor 1 (mGluR1)	6.83755e+07	6.34183e+07	0.9275	7.25679e+07	9.65513e+07	1.3305
Q3V1D5	PLPL1	Pnpla1	Omega-hydroxyceramide transacylase (EC 2.3.1.296) (Patatin-like phospholipase domain-containing protein 1)	678411	6.47477e+08	954.403	2.02991e+08	2.70046e+08	1.33033
P28650	PURA1	Adss1	Adenylosuccinate synthetase isozyme 1 (AMPSase 1) (AdSS 1) (EC 6.3.4.4) (Adenylosuccinate synthetase like 1) (Adenylosuccinate synthetase, basic isozyme) (Adenylosuccinate synthetase, muscle isozyme) (M-type adenylosuccinate synthetase) (IMP--aspartate ligase 1)	1.35583e+08	1.31102e+08	0.96695	1.29489e+08	1.72212e+08	1.32994
Q8K1J6	TRNT1	Trnt1	CCA tRNA nucleotidyltransferase 1, mitochondrial (EC 2.7.7.72) (mitochondrial tRNA nucleotidyl transferase, CCA-adding) (mt CCA-adding enzyme) (mt tRNA CCA-diphosphorylase) (mt tRNA CCA-pyrophosphorylase) (mt tRNA adenylyltransferase)	6.73423e+07	7.28813e+07	1.08225	4.5291e+07	6.01808e+07	1.32876
Q8BZN6	DOC10	Dock10	Dedicator of cytokinesis protein 10 (Zizimin-3)	3.01228e+07	3.21234e+07	1.06641	3.07482e+07	4.08425e+07	1.32829
Q8CAL5	GPC5	Gpc5	Glypican-5 [Cleaved into: Secreted glypican-5]	3.03065e+07	2.29298e+07	0.756595	3.68604e+07	4.89366e+07	1.32762
Q64669	NQO1	Nqo1	NAD(P)H dehydrogenase [quinone] 1 (EC 1.6.5.2) (Azoreductase) (DT-diaphorase) (DTD) (Menadione reductase) (NAD(P)H:quinone oxidoreductase 1) (Phylloquinone reductase) (Quinone reductase 1) (QR1)	5.44294e+07	3.14637e+07	0.578066	3.54842e+07	4.70662e+07	1.3264
Q3ULJ0	GPD1L	Gpd1l	Glycerol-3-phosphate dehydrogenase 1-like protein (EC 1.1.1.8)	4.14816e+08	5.81917e+08	1.40283	4.30142e+08	5.7003e+08	1.32521
Q9JKZ2	SC5A3	Slc5a3	Sodium/myo-inositol cotransporter (Na(+)/myo-inositol cotransporter) (Sodium/myo-inositol transporter 1) (SMIT1) (Solute carrier family 5 member 3)	678411	8.30097e+07	122.359	2.48234e+07	3.28741e+07	1.32432
Q8K2T4	UQCC3	Uqcc3	Ubiquinol-cytochrome-c reductase complex assembly factor 3	678411	3.44749e+07	50.8172	2.47284e+07	3.27376e+07	1.32389
Q08274	DMWD	Dmwd	Dystrophia myotonica WD repeat-containing protein (Dystrophia myotonica-containing WD repeat motif protein) (Protein DMR-N9)	2.53207e+07	3.00135e+07	1.18534	1.7678e+07	2.34018e+07	1.32378
Q8R3P0	ACY2	Aspa	Aspartoacylase (EC 3.5.1.15) (Aminoacylase-2) (ACY-2)	1.62878e+08	2.06594e+08	1.2684	2.03021e+08	2.68592e+08	1.32298
Q99JN2	KLH22	Klhl22	Kelch-like protein 22	2.45614e+07	3.76658e+07	1.53353	2.7696e+07	3.66165e+07	1.32209
Q62283	TSN7	Tspan7	Tetraspanin-7 (Tspan-7) (Cell surface glycoprotein A15) (PE31) (TALLA homolog) (Transmembrane 4 superfamily member 2) (CD antigen CD231)	8.78397e+07	9.71819e+07	1.10636	1.20555e+08	1.5937e+08	1.32197
Q9QYB1	CLIC4	Clic4	Chloride intracellular channel protein 4 (mc3s5/mtCLIC)	2.65714e+08	3.31194e+08	1.24643	2.66953e+08	3.52613e+08	1.32088
P62071	RRAS2	Rras2	Ras-related protein R-Ras2 (EC 3.6.5.-)	1.02371e+08	8.7522e+07	0.854952	7.07943e+07	9.35016e+07	1.32075
Q5EBJ4	ERMIN	Ermn	Ermin (Juxtanodin) (JN)	4.20379e+08	3.20517e+08	0.762447	4.85846e+08	6.41475e+08	1.32033
Q6PE01	SNR40	Snrnp40	U5 small nuclear ribonucleoprotein 40 kDa protein (U5 snRNP 40 kDa protein) (WD repeat-containing protein 57)	2.36449e+07	4.86388e+07	2.05705	2.70032e+07	3.56133e+07	1.31886
Q8BLQ7	CTR4	Slc7a4	Cationic amino acid transporter 4 (CAT-4) (CAT4) (Solute carrier family 7 member 4)	3.90757e+07	678411	0.0173614	4.85665e+07	6.40473e+07	1.31875
Q8BYB9	PGLT1	Poglut1	Protein O-glucosyltransferase 1 (EC 2.4.1.376) (CAP10-like 46 kDa protein) (KTEL motif-containing protein 1) (O-glucosyltransferase Rumi homolog) (Rumi) (Protein O-xylosyltransferase POGLUT1) (EC 2.4.2.63) (Wing-shaped neural plate protein) (Wsnp)	678411	2.04143e+07	30.0914	1.43277e+07	1.88765e+07	1.31748
O89051	ITM2B	Itm2b	Integral membrane protein 2B (Immature BRI2) (imBRI2) (Protein E25B) (Transmembrane protein BRI) (Bri) [Cleaved into: BRI2, membrane form (Mature BRI2) (mBRI2); BRI2 intracellular domain (BRI2 ICD); BRI2C, soluble form; Bri23 peptide (Bri2-23) (ABri23) (C-terminal peptide) (P23 peptide)]	1.10535e+08	1.21934e+08	1.10312	7.99607e+07	1.05311e+08	1.31703
O08579	EMD	Emd	Emerin	3.02537e+08	6.99918e+07	0.231349	4.31451e+07	5.68138e+07	1.31681
Q8K1N1	PLPL8	Pnpla8	Calcium-independent phospholipase A2-gamma (EC 3.1.1.-) (EC 3.1.1.5) (Intracellular membrane-associated calcium-independent phospholipase A2 gamma) (iPLA2-gamma) (Patatin-like phospholipase domain-containing protein 8)	3.65663e+07	3.56886e+07	0.975995	1.3411e+07	1.76558e+07	1.31651
Q3UHE1	PITM3	Pitpnm3	Membrane-associated phosphatidylinositol transfer protein 3 (Phosphatidylinositol transfer protein, membrane-associated 3) (PITPnm 3) (Pyk2 N-terminal domain-interacting receptor 1) (NIR-1)				1.02555e+07	1.35012e+07	1.31648
Q9ET77	JPH3	Jph3	Junctophilin-3 (JP-3) (Junctophilin type 3)	3.77602e+07	2.96281e+07	0.784639	1.99224e+07	2.62271e+07	1.31646
Q8K2V6	IPO11	Ipo11	Importin-11 (Imp11) (Ran-binding protein 11) (RanBP11)	2.34691e+07	2.11058e+07	0.899302	7.72323e+06	1.01658e+07	1.31626
P08226	APOE	Apoe	Apolipoprotein E (Apo-E)	7.87198e+08	1.05496e+09	1.34015	7.87926e+08	1.03684e+09	1.31591
P35279	RAB6A	Rab6a	Ras-related protein Rab-6A (Rab-6)	3.36268e+08	3.52654e+08	1.04873	1.74872e+08	2.30066e+08	1.31562
Q8BZB2	COAC	Ppcdc	Phosphopantothenoylcysteine decarboxylase (PPC-DC) (EC 4.1.1.36) (CoaC)	7.46713e+06	5.28912e+06	0.70832	7.5766e+06	9.95855e+06	1.31438
Q9D404	OXSM	Oxsm	3-oxoacyl-[acyl-carrier-protein] synthase, mitochondrial (EC 2.3.1.41) (Beta-ketoacyl-ACP synthase)	2.96716e+07	2.7677e+07	0.932776	1.68856e+07	2.21803e+07	1.31356
Q8BFR4	GNS	Gns	N-acetylglucosamine-6-sulfatase (EC 3.1.6.14) (Glucosamine-6-sulfatase) (G6S)	2.49618e+07	2.5031e+07	1.00277	2.07743e+07	2.72881e+07	1.31355
Q8C0Y0	PP4R4	Ppp4r4	Serine/threonine-protein phosphatase 4 regulatory subunit 4	2.53996e+07	2.63052e+07	1.03565	1.62971e+07	2.14057e+07	1.31347
Q9EQU5	SET	Set	Protein SET (Phosphatase 2A inhibitor I2PP2A) (I-2PP2A) (Template-activating factor I) (TAF-I)	6.61984e+08	4.66014e+08	0.703966	2.38297e+08	3.12994e+08	1.31346
P97471	SMAD4	Smad4	Mothers against decapentaplegic homolog 4 (MAD homolog 4) (Mothers against DPP homolog 4) (Deletion target in pancreatic carcinoma 4 homolog) (SMAD family member 4) (SMAD 4) (Smad4)	678411	1.17583e+07	17.3321	1.64426e+07	2.15922e+07	1.31318
Q9D1G3	HHATL	Hhatl	Protein-cysteine N-palmitoyltransferase HHAT-like protein (Glycerol uptake/transporter homolog) (Hedgehog acyltransferase-like protein)	6.54693e+06	1.19798e+07	1.82983	1.12993e+07	1.48358e+07	1.31299
Q3UUJ4	STRAA	Strada	STE20-related kinase adapter protein alpha (STRAD alpha) (STE20-related adapter protein)	7.89427e+07	9.1415e+07	1.15799	2.22209e+07	2.91668e+07	1.31259
Q4VBD2	TAPT1	Tapt1	Transmembrane anterior posterior transformation protein 1	8.59166e+06	11490590	1.33741	9.70893e+06	1.27383e+07	1.31202
P19246	NFH	Nefh	Neurofilament heavy polypeptide (NF-H) (200 kDa neurofilament protein) (Neurofilament triplet H protein)	7.2905e+08	7.96733e+08	1.09284	7.41205e+08	9.72111e+08	1.31153
Q9Z1R4	CF047	D17h6s53e	Uncharacterized protein C6orf47 homolog				9.39776e+06	1.23252e+07	1.3115
Q3TQI7	TLS1		Telomere length and silencing protein 1 homolog				1.01751e+07	1.3337e+07	1.31075
Q9QZB7	ARP10	Actr10	Actin-related protein 10 (Actin-related protein 11)	8.91725e+07	1.11543e+08	1.25087	8.05978e+07	1.056e+08	1.31021
P54728	RD23B	Rad23b	UV excision repair protein RAD23 homolog B (HR23B) (mHR23B) (XP-C repair-complementing complex 58 kDa protein) (p58)	2.5277e+08	2.47722e+08	0.980029	2.9058e+08	3.80597e+08	1.30978
Q7TSV4	PGM2	Pgm2	Phosphoglucomutase-2 (PGM 2) (EC 5.4.2.2) (Glucose phosphomutase 2) (Phosphodeoxyribomutase) (Phosphoglucomutase-1) (Phosphopentomutase) (EC 5.4.2.7)	2.12892e+07	2.86544e+07	1.34596	2.63566e+07	3.45182e+07	1.30966
Q9DB32	HAGHL	Haghl	Hydroxyacylglutathione hydrolase-like protein (EC 3.1.2.-)	2.63896e+07	3.04992e+07	1.15573	1.88032e+07	2.45984e+07	1.3082
Q8VDK1	NIT1	Nit1	Deaminated glutathione amidase (dGSH amidase) (EC 3.5.1.128) (Nitrilase homolog 1)	1.04774e+08	1.06755e+08	1.01891	6.83317e+07	8.93812e+07	1.30805
Q99LE6	ABCF2	Abcf2	ATP-binding cassette sub-family F member 2	5.53256e+07	5.92644e+07	1.07119	3.55763e+07	4.65207e+07	1.30763
Q9CQF4	MRES1	Mtres1	Mitochondrial transcription rescue factor 1	7.17979e+07	3.68358e+07	0.513049	2.79632e+07	3.65589e+07	1.30739
P46061	RAGP1	Rangap1	Ran GTPase-activating protein 1 (RanGAP1)	8.71513e+07	8.57085e+07	0.983445	69078200	9.03044e+07	1.30728
Q8R395	COMD5	Commd5	COMM domain-containing protein 5	6.16712e+07	3.25085e+07	0.527126	2.07372e+07	2.70776e+07	1.30575
Q8BWU5	OSGEP	Osgep	Probable tRNA N6-adenosine threonylcarbamoyltransferase (EC 2.3.1.234) (N6-L-threonylcarbamoyladenine synthase) (t(6)A synthase) (O-sialoglycoprotein endopeptidase) (t(6)A37 threonylcarbamoyladenosine biosynthesis protein Osgep) (tRNA threonylcarbamoyladenosine biosynthesis protein Osgep)	1.89558e+07	1.47556e+07	0.77842	8.12451e+06	1.06077e+07	1.30564
Q99J47	DRS7B	Dhrs7b	Dehydrogenase/reductase SDR family member 7B (EC 1.1.-.-) (Short-chain dehydrogenase/reductase family 32C member 1)	3.36966e+07	3.53282e+07	1.04842	1.4617e+07	1.90768e+07	1.30512
Q00623	APOA1	Apoa1	Apolipoprotein A-I (Apo-AI) (ApoA-I) (Apolipoprotein A1) [Cleaved into: Proapolipoprotein A-I (ProapoA-I); Truncated apolipoprotein A-I]	1.93916e+08	8.22331e+07	0.424066	7.73901e+07	1.01e+08	1.30507
Q63739	TP4A1	Ptp4a1	Protein tyrosine phosphatase type IVA 1 (EC 3.1.3.48) (Protein-tyrosine phosphatase 4a1) (Protein-tyrosine phosphatase of regenerating liver 1) (PRL-1)	2.65103e+07	1.62879e+07	0.614399	3.83665e+07	5.00126e+07	1.30355
Q8CBY8	DCTN4	Dctn4	Dynactin subunit 4 (Dynactin subunit p62)	1.51169e+08	1.6032e+08	1.06054	1.05004e+08	1.36857e+08	1.30334
Q8CFI7	RPB2	Polr2b	DNA-directed RNA polymerase II subunit RPB2 (EC 2.7.7.6) (DNA-directed RNA polymerase II 140 kDa polypeptide) (DNA-directed RNA polymerase II subunit B) (RNA polymerase II subunit 2) (RNA polymerase II subunit B2)	8.54125e+06	2.4183e+07	2.83131	1.54243e+07	2.00709e+07	1.30125
Q01339	APOH	Apoh	Beta-2-glycoprotein 1 (APC inhibitor) (Activated protein C-binding protein) (Apolipoprotein H) (Apo-H) (Beta-2-glycoprotein I) (B2GPI) (Beta(2)GPI)	1.93199e+07	1.66022e+07	0.859334	1.10482e+07	1.43757e+07	1.30118
Q8K2H2	OTU6B	Otud6b	Deubiquitinase OTUD6B (OTU domain-containing protein 6B) (EC 3.4.19.12)	3.77525e+07	3.85801e+07	1.02192	2.69202e+07	3.5026e+07	1.3011
Q6P9Q6	FKB15	Fkbp15	FK506-binding protein 15 (FKBP-15) (133 kDa FK506-binding protein) (133 kDa FKBP) (FKBP-133) (WASP and FKBP-like) (WAFL)	3.71978e+07	4.56303e+07	1.22669	2.74561e+07	3.56824e+07	1.29961
P97315	CSRP1	Csrp1	Cysteine and glycine-rich protein 1 (Cysteine-rich protein 1) (CRP) (CRP1)	5.43704e+08	6.82061e+08	1.25447	9.95223e+08	1.29339e+09	1.2996
Q8K2C6	SIR5	Sirt5	NAD-dependent protein deacylase sirtuin-5, mitochondrial (EC 2.3.1.-) (Regulatory protein SIR2 homolog 5) (SIR2-like protein 5)	4.3202e+07	6.87454e+07	1.59126	4.16674e+07	5.41472e+07	1.29951
Q9CZH7	MXRA7	Mxra7	Matrix-remodeling-associated protein 7	9.16945e+06	678411	0.073986	8.5824e+06	1.11522e+07	1.29943
Q99K46	UBP11	Usp11	Ubiquitin carboxyl-terminal hydrolase 11 (EC 3.4.19.12) (Deubiquitinating enzyme 11) (Ubiquitin thioesterase 11) (Ubiquitin-specific-processing protease 11)	3.03705e+07	2.51071e+07	0.826694	1.59982e+07	2.07867e+07	1.29932
Q4V9Z5	SE6L2	Sez6l2	Seizure 6-like protein 2 (Brain-specific receptor-like protein A) (BSRP-A)	9.73686e+07	101835226	1.04587	7.08266e+07	92021518	1.29925
P42227	STAT3	Stat3	Signal transducer and activator of transcription 3 (Acute-phase response factor)	3.28205e+07	3.7881e+07	1.15419	2.00554e+07	2.60478e+07	1.29879
P60824	CIRBP	Cirbp	Cold-inducible RNA-binding protein (A18 hnRNP) (Glycine-rich RNA-binding protein CIRP)	7.57946e+07	1.03902e+08	1.37084	1.46108e+08	1.89664e+08	1.29811
Q9JJ59	ABCB9	Abcb9	ABC-type oligopeptide transporter ABCB9 (EC 7.4.2.6) (ATP-binding cassette sub-family B member 9) (ATP-binding cassette transporter 9) (ABC transporter 9 protein) (mABCB9) (TAP-like protein) (TAPL)	1.79786e+07	3.51555e+07	1.95541	1.44711e+07	1.87849e+07	1.2981
P28738	KIF5C	Kif5c	Kinesin heavy chain isoform 5C (Kinesin heavy chain neuron-specific 2)	2.02139e+08	2.08457e+08	1.03126	1.40241e+08	1.81979e+08	1.29761
Q9JLQ0	CD2AP	Cd2ap	CD2-associated protein (Mesenchyme-to-epithelium transition protein with SH3 domains 1) (METS-1)				8.2189e+06	1.06635e+07	1.29744
P60840	ENSA	Ensa	Alpha-endosulfine (ARPP-19e)	5.76138e+08	5.53748e+08	0.961138	5.13674e+08	6.66311e+08	1.29715
P63254	CRIP1	Crip1	Cysteine-rich protein 1 (CRP-1) (Cysteine-rich intestinal protein) (CRIP)	1.3928e+08	9.05213e+07	0.649925	1.69048e+08	2.19131e+08	1.29626
P97492	RGS14	Rgs14	Regulator of G-protein signaling 14 (RGS14) (RAP1/RAP2-interacting protein) (RPIP1)	1.43584e+08	8.4633e+07	0.589432	4.06714e+07	5.27031e+07	1.29583
Q8R1S0	COQ6	Coq6	Ubiquinone biosynthesis monooxygenase COQ6, mitochondrial (EC 1.14.13.-) (Coenzyme Q10 monooxygenase 6)	4.29937e+07	4.48126e+07	1.04231	3.94229e+07	5.10644e+07	1.2953
P55288	CAD11	Cdh11	Cadherin-11 (OSF-4) (Osteoblast cadherin) (OB-cadherin)	6.00391e+07	3.49382e+07	0.581923	2.75496e+07	3.56668e+07	1.29464
P28184	MT3	Mt3	Metallothionein-3 (MT-3) (Growth inhibitory factor) (GIF) (Metallothionein-III) (MT-III)	1.62497e+07	1.36459e+07	0.839765	1.88821e+07	2.44409e+07	1.29439
Q99L27	GMPR2	Gmpr2	GMP reductase 2 (GMPR 2) (EC 1.7.1.7) (Guanosine 5'-monophosphate oxidoreductase 2) (Guanosine monophosphate reductase 2)	1.7952e+07	4.73503e+07	2.63761	6.01325e+07	7.78167e+07	1.29409
Q61584	FXR1	Fxr1	Fragile X mental retardation syndrome-related protein 1 (mFxr1p)	5.07899e+07	5.44294e+07	1.07166	4.06449e+07	5.25788e+07	1.29361
Q9QWW1	HOME2	Homer2	Homer protein homolog 2 (Homer-2) (Cupidin) (VASP/Ena-related gene up-regulated during seizure and LTP 2) (Vesl-2)	5.59203e+07	5.72342e+07	1.02349	3.94856e+07	5.10781e+07	1.29359
Q02105	C1QC	C1qc	Complement C1q subcomponent subunit C	2.30314e+08	3.54e+08	1.53703	1.29782e+08	1.6784e+08	1.29325
Q76MZ3	2AAA	Ppp2r1a	Serine/threonine-protein phosphatase 2A 65 kDa regulatory subunit A alpha isoform (PP2A subunit A isoform PR65-alpha) (PP2A subunit A isoform R1-alpha)	3.08676e+09	3.06907e+09	0.994269	1.99911e+09	2.58522e+09	1.29318
P28867	KPCD	Prkcd	Protein kinase C delta type (EC 2.7.11.13) (Tyrosine-protein kinase PRKCD) (EC 2.7.10.2) (nPKC-delta) [Cleaved into: Protein kinase C delta type regulatory subunit; Protein kinase C delta type catalytic subunit (Sphingosine-dependent protein kinase-1) (SDK1)]	2.14046e+07	5.88432e+07	2.74909	2.45061e+07	3.16881e+07	1.29307
Q8C0I1	ADAS	Agps	Alkyldihydroxyacetonephosphate synthase, peroxisomal (Alkyl-DHAP synthase) (EC 2.5.1.26) (Alkylglycerone-phosphate synthase)	1.50894e+07	2.09329e+07	1.38726	9.88876e+06	1.27847e+07	1.29285
Q8R5M8	CADM1	Cadm1	Cell adhesion molecule 1 (Immunoglobulin superfamily member 4) (IgSF4) (Nectin-like protein 2) (NECL-2) (Spermatogenic immunoglobulin superfamily) (SgIgSF) (Synaptic cell adhesion molecule) (SynCAM) (Tumor suppressor in lung cancer 1) (TSLC-1)	5.67774e+08	6.87861e+08	1.2115	6.91084e+08	8.9301e+08	1.29219
Q56A07	SCN2B	Scn2b	Sodium channel subunit beta-2	4.13502e+08	4.16324e+08	1.00683	2.78532e+08	3.59707e+08	1.29144
Q8BY89	CTL2	Slc44a2	Choline transporter-like protein 2 (Solute carrier family 44 member 2)	9.43869e+07	1.28485e+08	1.36126	3.13239e+07	4.04518e+07	1.2914
P24638	PPAL	Acp2	Lysosomal acid phosphatase (LAP) (EC 3.1.3.2)	3.26397e+07	2.86046e+07	0.876373	3.55725e+07	4.59371e+07	1.29137
O09126	SEM4D	Sema4d	Semaphorin-4D (M-Sema G) (Semaphorin-C-like 2) (Semaphorin-J) (Sema J) (CD antigen CD100)	24209278	2.60308e+07	1.07524	1.25303e+07	1.61783e+07	1.29113
O89116	VTI1A	Vti1a	Vesicle transport through interaction with t-SNAREs homolog 1A (Vesicle transport v-SNARE protein Vti1-like 2) (Vti1-rp2)	7.62842e+07	7.12045e+07	0.933411	6.91011e+07	8.92154e+07	1.29109
Q8BI08	MAL2	Mal2	Protein MAL2	7.89953e+08	9.78037e+08	1.23809	9.71897e+08	1.2545e+09	1.29078
P61205	ARF3	Arf3	ADP-ribosylation factor 3	4.93382e+07	9.02311e+07	1.82883	2.81115e+07	3.62812e+07	1.29062
Q9D9V3	ECHD1	Echdc1	Ethylmalonyl-CoA decarboxylase (EC 4.1.1.94) (Enoyl-CoA hydratase domain-containing protein 1) (Methylmalonyl-CoA decarboxylase) (MMCD)	1.06225e+08	1.04983e+08	0.988306	7.68223e+07	9.90655e+07	1.28954
Q64455	PTPRJ	Ptprj	Receptor-type tyrosine-protein phosphatase eta (Protein-tyrosine phosphatase eta) (R-PTP-eta) (EC 3.1.3.48) (HPTP beta-like tyrosine phosphatase) (Protein-tyrosine phosphatase receptor type J) (R-PTP-J) (Susceptibility to colon cancer 1) (CD antigen CD148)	3.9732e+07	3.7991e+07	0.956179	2.66851e+07	3.43869e+07	1.28862
A2APX8	SCN1A	Scn1a	Sodium channel protein type 1 subunit alpha (Sodium channel protein brain I subunit alpha) (Sodium channel protein type I subunit alpha) (Voltage-gated sodium channel subunit alpha Nav1.1)	2.22011e+07	8.87708e+06	0.399848	2.28486e+07	2.94406e+07	1.28851
Q8BXR9	OSBL6	Osbpl6	Oxysterol-binding protein-related protein 6 (ORP-6) (OSBP-related protein 6)	4.16395e+07	4.58247e+07	1.10051	1.79653e+07	2.3102e+07	1.28593
Q8BVE3	VATH	Atp6v1h	V-type proton ATPase subunit H (V-ATPase subunit H) (Vacuolar proton pump subunit H)	1.9483e+09	1.98776e+09	1.02025	1.10873e+09	1.42562e+09	1.28581
Q9CQJ6	DENR	Denr	Density-regulated protein (DRP)	9.71253e+07	9.59767e+07	0.988174	4.43915e+07	5.70253e+07	1.2846
Q9JHL1	NHRF2	Slc9a3r2	Na(+)/H(+) exchange regulatory cofactor NHE-RF2 (NHERF-2) (NHE3 kinase A regulatory protein E3KARP) (Octs2) (SRY-interacting protein 1) (SIP-1) (Sodium-hydrogen exchanger regulatory factor 2) (Solute carrier family 9 isoform A3 regulatory factor 2) (Tyrosine kinase activator protein 1) (TKA-1)	4.91565e+07	5.71751e+07	1.16312	3.04815e+07	3.91479e+07	1.28431
Q8CHW4	EI2BE	Eif2b5	Translation initiation factor eIF-2B subunit epsilon (eIF-2B GDP-GTP exchange factor subunit epsilon)	2.88377e+07	4.92972e+07	1.70947	2.25379e+07	2.89108e+07	1.28276
Q03157	APLP1	Aplp1	Amyloid beta precursor like protein 1 (Amyloid beta (A4) precursor-like protein 1) (Amyloid-like protein 1) (APLP) (APLP-1) [Cleaved into: C30]	8.64301e+07	9.96064e+07	1.15245	9.58685e+07	1.22973e+08	1.28273
Q9Z127	LAT1	Slc7a5	Large neutral amino acids transporter small subunit 1 (4F2 light chain) (4F2 LC) (4F2LC) (L-type amino acid transporter 1) (LAT1) (Solute carrier family 7 member 5)	1.20728e+08	2.56014e+07	0.212059	1.04368e+08	1.33836e+08	1.28235
Q9WVT6	CAH14	Ca14	Carbonic anhydrase 14 (EC 4.2.1.1) (Carbonate dehydratase XIV) (Carbonic anhydrase XIV) (CA-XIV)	4.99521e+07	4.3564e+07	0.872114	5.38871e+07	6.91011e+07	1.28233
Q3UH68	LIMC1	Limch1	LIM and calponin homology domains-containing protein 1	7.10833e+07	4.31477e+07	0.607002	3.0282e+07	3.88092e+07	1.28159
Q9CY58	PAIRB	Serbp1	Plasminogen activator inhibitor 1 RNA-binding protein (PAI1 RNA-binding protein 1) (PAI-RBP1) (SERPINE1 mRNA-binding protein 1)	2.63393e+08	2.49065e+08	0.945603	3.29957e+08	4.22827e+08	1.28146
O35393	EFNB3	Efnb3	Ephrin-B3	1.84478e+07	5.37068e+07	2.91128	7.91589e+07	1.01394e+08	1.28089
Q921Q7	RIN1	Rin1	Ras and Rab interactor 1 (Ras interaction/interference protein 1)	4.59978e+07	4.71474e+07	1.02499	2.87339e+07	3.67768e+07	1.27991
Q8BGD5	CPT1C	Cpt1c	Carnitine O-palmitoyltransferase 1, brain isoform (CPT1-B) (EC 2.3.1.21) (CPT IC) (Carnitine O-palmitoyltransferase I, brain isoform) (CPTI-B) (Carnitine palmitoyltransferase 1C)	9.15532e+07	8.59389e+07	0.938678	7.00227e+07	8.96202e+07	1.27987
Q8VCT3	AMPB	Rnpep	Aminopeptidase B (AP-B) (EC 3.4.11.6) (Arginine aminopeptidase) (Arginyl aminopeptidase) (Cytosol aminopeptidase IV)	2.07926e+08	1.94047e+08	0.933249	1.64908e+08	2.11042e+08	1.27976
P26043	RADI	Rdx	Radixin (ESP10)	1.409e+08	1.60035e+08	1.1358	1.29394e+08	1.65579e+08	1.27965
Q9WTR1	TRPV2	Trpv2	Transient receptor potential cation channel subfamily V member 2 (TrpV2) (Growth factor-regulated calcium channel) (GRC) (Osm-9-like TRP channel 2) (OTRPC2)	1.11069e+07	1.22072e+07	1.09906	1.38502e+07	1.77173e+07	1.27921
Q99MB7	RN141	Rnf141	RING finger protein 141 (Zinc finger protein 230)	5.38729e+07	4.96966e+07	0.922479	4.09787e+07	5.23789e+07	1.2782
P98084	APBA2	Apba2	Amyloid-beta A4 precursor protein-binding family A member 2 (Adapter protein X11beta) (Neuron-specific X11L protein) (Neuronal Munc18-1-interacting protein 2) (Mint-2)	5.35968e+07	4.00067e+07	0.746439	2.36919e+07	3.0282e+07	1.27816
Q9CRC3	CO040		UPF0235 protein C15orf40 homolog	4.06616e+07	3.49106e+07	0.858563	2.16707e+07	2.7696e+07	1.27804
Q9CPT3	NANP	Nanp	N-acylneuraminate-9-phosphatase (EC 3.1.3.29) (Haloacid dehalogenase-like hydrolase domain-containing protein 4) (Neu5Ac-9-Pase)				2.01894e+07	2.57971e+07	1.27776
Q99KW9	TIP	Itfg1	T-cell immunomodulatory protein (Protein TIP) (Integrin-alpha FG-GAP repeat-containing protein 1) (Linkin)	4.49911e+07	3.98083e+07	0.884804	3.19035e+07	4.07387e+07	1.27694
Q3TRR0	MAP9	Map9	Microtubule-associated protein 9 (Aster-associated protein)	7.62856e+06	7.22584e+06	0.947208	1.26874e+07	1.61894e+07	1.27603
Q80WG5	LRC8A	Lrrc8a	Volume-regulated anion channel subunit LRRC8A (Leucine-rich repeat-containing protein 8A) (Protein ebouriffe) (ebo)	2.83612e+07	4.30844e+07	1.51913	4.75784e+07	6.06574e+07	1.27489
P40336	VP26A	Vps26a	Vacuolar protein sorting-associated protein 26A (H<beta>58 protein) (H beta 58) (Vesicle protein sorting 26A) (mVPS26)	1.15177e+08	1.1324e+08	0.983184	9.25954e+07	1.18024e+08	1.27463
B0V2N1	PTPRS	Ptprs	Receptor-type tyrosine-protein phosphatase S (R-PTP-S) (EC 3.1.3.48) (PTPNU-3) (Receptor-type tyrosine-protein phosphatase sigma) (R-PTP-sigma)	2.55871e+08	2.73707e+08	1.0697	1.49775e+08	1.9087e+08	1.27438
Q04736	YES	Yes1	Tyrosine-protein kinase Yes (EC 2.7.10.2) (Proto-oncogene c-Yes) (p61-Yes)	3.12356e+07	1.43266e+07	0.458661	2.12093e+07	2.70251e+07	1.27421
Q4VA53	PDS5B	Pds5b	Sister chromatid cohesion protein PDS5 homolog B (Androgen-induced proliferation inhibitor) (Androgen-induced prostate proliferative shutoff-associated protein AS3)	2.3946e+07	2.068e+07	0.863611	2.59753e+07	3.30973e+07	1.27418
Q8VHC3	SELM	Selenom	Selenoprotein M (SelM)	2.06957e+07	2.8287e+07	1.3668	3.88498e+07	4.94772e+07	1.27355
Q9DB25	ALG5	Alg5	Dolichyl-phosphate beta-glucosyltransferase (DolP-glucosyltransferase) (EC 2.4.1.117) (Asparagine-linked glycosylation protein 5 homolog)	2.34122e+07	3.4194e+07	1.46052	1.47724e+07	1.88032e+07	1.27287
P43006	EAA2	Slc1a2	Excitatory amino acid transporter 2 (GLT-1) (Sodium-dependent glutamate/aspartate transporter 2) (Solute carrier family 1 member 2)	4.66774e+09	3.76803e+09	0.807249	3.54864e+09	4.51605e+09	1.27261
Q99J27	ACATN	Slc33a1	Acetyl-coenzyme A transporter 1 (AT-1) (Acetyl-CoA transporter 1) (Solute carrier family 33 member 1)	2.1652e+07	2.16667e+07	1.00068	1.00949e+07	1.28441e+07	1.27234
P60603	ROMO1	Romo1	Reactive oxygen species modulator 1 (ROS modulator 1) (Protein MGR2 homolog)	1.04665e+08	1.02135e+08	0.975829	5.48239e+07	69747130	1.2722
P48774	GSTM5	Gstm5	Glutathione S-transferase Mu 5 (EC 2.5.1.18) (Fibrous sheath component 2) (Fsc2) (GST class-mu 5)	1.71686e+09	1.65601e+09	0.964556	1.19541e+09	1.52035e+09	1.27182
Q5SRX1	TM1L2	Tom1l2	TOM1-like protein 2 (Target of Myb-like protein 2)	3.78736e+08	2.73354e+08	0.721753	3.76596e+08	4.7864e+08	1.27096
Q8CB27	OTU1	Yod1	Ubiquitin thioesterase OTU1 (EC 3.4.19.12)	1.7463e+07	1.96973e+07	1.12794	1.30059e+07	1.65273e+07	1.27075
Q8R3B1	PLCD1	Plcd1	1-phosphatidylinositol 4,5-bisphosphate phosphodiesterase delta-1 (EC 3.1.4.11) (Phosphoinositide phospholipase C-delta-1) (Phospholipase C-delta-1) (PLC-delta-1)	4.92737e+07	6.02016e+07	1.22178	5.91847e+07	7.52013e+07	1.27062
Q149L6	DJB14	Dnajb14	DnaJ homolog subfamily B member 14	1.90495e+07	1.97486e+07	1.0367	1.29475e+07	1.64426e+07	1.26995
Q7TMS5	ABCG2	Abcg2	Broad substrate specificity ATP-binding cassette transporter ABCG2 (EC 7.6.2.2) (ATP-binding cassette sub-family G member 2) (Breast cancer resistance protein 1 homolog) (Urate exporter) (CD antigen CD338)	1.10686e+06	3.67585e+07	33.2096	2.70664e+07	3.43662e+07	1.2697
Q3UZP4	SVIP	Svip	Small VCP/p97-interacting protein	2.06039e+08	2.16004e+08	1.04836	2.21278e+08	2.80739e+08	1.26872
Q60770	STXB3	Stxbp3	Syntaxin-binding protein 3 (MUNC-18-3) (Mammalian homolog of Unc-18c) (Munc-18c) (Protein unc-18 homolog 3) (Unc18-3) (Protein unc-18 homolog C) (Unc-18C)	4.96966e+07	6.98796e+07	1.40612	5.03524e+07	6.38523e+07	1.26811
Q80SW1	SAHH2	Ahcyl1	S-adenosylhomocysteine hydrolase-like protein 1 (IP3R-binding protein released with inositol 1,4,5-trisphosphate) (Putative adenosylhomocysteinase 2) (S-adenosyl-L-homocysteine hydrolase 2) (AdoHcyase 2)	9.93063e+08	6.96912e+08	0.70178	6.52739e+08	8.27593e+08	1.26788
P62141	PP1B	Ppp1cb	Serine/threonine-protein phosphatase PP1-beta catalytic subunit (PP-1B) (EC 3.1.3.16) (EC 3.1.3.53)	5.31093e+08	2.67029e+08	0.502792	4.5888e+08	5.81701e+08	1.26765
P97412	LYST	Lyst	Lysosomal-trafficking regulator (Beige protein) (CHS1 homolog)	8.87708e+06	6.96959e+06	0.785122	6.60384e+06	8.36777e+06	1.26711
Q8BH27	MEGF9	Megf9	Multiple epidermal growth factor-like domains protein 9 (Multiple EGF-like domains protein 9) (Epidermal growth factor-like protein 5) (EGF-like protein 5)	3.59163e+07	3.52628e+07	0.981804	4.30713e+07	5.45702e+07	1.26697
Q61142	SPIN1	Spin1	Spindlin-1 (30000 Mr metaphase complex) (SSEC P) (Spindlin1)	6.90046e+06	678411	0.0983139	4.9004e+06	6.20618e+06	1.26647
P08553	NFM	Nefm	Neurofilament medium polypeptide (NF-M) (160 kDa neurofilament protein) (Neurofilament 3) (Neurofilament triplet M protein)	1.50171e+10	2761495645	0.183889	2.48356e+09	3.14457e+09	1.26616
P16014	SCG1	Chgb	Secretogranin-1 (Chromogranin-B) (CgB) (Secretogranin I) (SgI) [Cleaved into: CCB peptide; PE-11]	7.89012e+07	1.05217e+07	0.133353	6.45607e+07	8.17068e+07	1.26558
Q80YV4	PANK4	Pank4	4'-phosphopantetheine phosphatase (EC 3.1.3.-) (Inactive pantothenic acid kinase 4) (mPanK4)	3.06265e+07	3.59436e+07	1.17361	2.40975e+07	3.04815e+07	1.26492
O88597	BECN1	Becn1	Beclin-1 (Coiled-coil myosin-like BCL2-interacting protein) [Cleaved into: Beclin-1-C 35 kDa; Beclin-1-C 37 kDa]	1.31599e+07	2.0928e+07	1.59029	2.34199e+07	2.96239e+07	1.2649
Q921Y0	MOB1A	Mob1a	MOB kinase activator 1A (Mob1 homolog 1B) (Mps one binder kinase activator-like 1B)	3.87207e+07	4.73034e+07	1.22166	3.63737e+07	4.60045e+07	1.26477
Q9JK42	PDK2	Pdk2	[Pyruvate dehydrogenase (acetyl-transferring)] kinase isozyme 2, mitochondrial (EC 2.7.11.2) (Pyruvate dehydrogenase kinase isoform 2) (PDH kinase 2)	1.16247e+08	1.25102e+08	1.07617	8.22094e+07	1.03924e+08	1.26414
Q9EP72	EMC7	Emc7	ER membrane protein complex subunit 7	9.59767e+07	9.20179e+07	0.958753	6.22476e+06	7.86884e+06	1.26412
Q9R0P6	SC11A	Sec11a	Signal peptidase complex catalytic subunit SEC11A (EC 3.4.21.89) (Endopeptidase SP18) (Microsomal signal peptidase 18 kDa subunit) (SPase 18 kDa subunit) (SEC11 homolog A) (SEC11-like protein 1) (SPC18) (Sid 2895)	678411	2.78553e+07	41.0597	1.11905e+07	1.41421e+07	1.26376
P70188	KIFA3	Kifap3	Kinesin-associated protein 3 (KAP-3) (KAP3)	7.7889e+07	7.86594e+07	1.00989	4.47326e+07	5.65312e+07	1.26376
O70325	GPX4	Gpx4	Phospholipid hydroperoxide glutathione peroxidase (PHGPx) (EC 1.11.1.12) (Glutathione peroxidase 4) (GPx-4) (GSHPx-4)	2.74132e+08	3.59528e+08	1.31151	2.41837e+08	3.056e+08	1.26366
Q62433	NDRG1	Ndrg1	Protein NDRG1 (N-myc downstream-regulated gene 1 protein) (Protein Ndr1)	3.34233e+08	4.11195e+08	1.23027	3.52005e+08	4.44624e+08	1.26312
A6H630	ARMT1	Armt1	Damage-control phosphatase ARMT1 (EC 3.1.3.-) (Acidic residue methyltransferase 1) (Protein-glutamate O-methyltransferase) (EC 2.1.1.-) (Sugar phosphate phosphatase ARMT1)	7.03501e+07	7.29774e+07	1.03735	3.79175e+07	4.78864e+07	1.26291
P60202	MYPR	Plp1	Myelin proteolipid protein (PLP) (Lipophilin)	3.41204e+10	3.41204e+10	1	2.1936e+10	2.7698e+10	1.26268
P47740	AL3A2	Aldh3a2	Aldehyde dehydrogenase family 3 member A2 (EC 1.2.1.3) (EC 1.2.1.94) (Aldehyde dehydrogenase 3) (Fatty aldehyde dehydrogenase)	1.38623e+08	1.20728e+08	0.870908	1.20865e+08	1.52512e+08	1.26184
Q8BHJ7	GBRA5	Gabra5	Gamma-aminobutyric acid receptor subunit alpha-5 (GABA(A) receptor subunit alpha-5)	6.72999e+07	1.68007e+07	0.249638	4.42871e+07	5.58804e+07	1.26178
Q5SYD0	MYO1D	Myo1d	Unconventional myosin-Id	1.15496e+08	1.47021e+08	1.27295	1.39136e+08	1.75444e+08	1.26095
Q91VM3	WIPI4	Wdr45	WD repeat domain phosphoinositide-interacting protein 4 (WIPI-4) (WD repeat domain X-linked 1) (WD repeat-containing protein 45)	1.61013e+07	2.33852e+07	1.45238	3.87621e+07	4.88636e+07	1.2606
O35465	FKBP8	Fkbp8	Peptidyl-prolyl cis-trans isomerase FKBP8 (PPIase FKBP8) (EC 5.2.1.8) (38 kDa FK506-binding protein) (38 kDa FKBP) (FKBP-38) (mFKBP38) (FK506-binding protein 8) (FKBP-8) (FKBPR38) (Rotamase)	1.48489e+08	1.79648e+08	1.20984	8.24897e+07	1.03962e+08	1.2603
P70208	PLXA3	Plxna3	Plexin-A3	678411	5.91699e+06	8.72183	3.03092e+06	3.81851e+06	1.25985
Q8BI84	TGO1	Mia3	Transport and Golgi organization protein 1 homolog (TANGO1) (Melanoma inhibitory activity protein 3)	8.72112e+06	1.34166e+07	1.5384	1.09824e+07	1.38361e+07	1.25985
Q922D4	PP6R3	Ppp6r3	Serine/threonine-protein phosphatase 6 regulatory subunit 3 (SAPS domain family member 3)	5.16022e+07	4.33235e+07	0.839568	4.87584e+07	6.13606e+07	1.25846
Q80YA7	DPP8	Dpp8	Dipeptidyl peptidase 8 (DP8) (EC 3.4.14.5) (Dipeptidyl peptidase VIII) (DPP VIII)	2.83144e+07	2.44325e+07	0.862899	2.17653e+07	2.73887e+07	1.25836
O09117	SYPL1	Sypl1	Synaptophysin-like protein 1 (Pantophysin)	2.34203e+08	2.47621e+08	1.05729	2.0404e+08	2.56686e+08	1.25802
Q62132	PTPRR	Ptprr	Receptor-type tyrosine-protein phosphatase R (R-PTP-R) (EC 3.1.3.48) (Phosphotyrosine phosphatase 13) (Protein-tyrosine-phosphatase SL)				7.00948e+06	8.81456e+06	1.25752
Q3UR70	TGFA1	Tgfbrap1	Transforming growth factor-beta receptor-associated protein 1 (TGF-beta receptor-associated protein 1) (TRAP-1) (TRAP1)	2.97378e+07	2.14421e+07	0.721037	1.20998e+07	1.52152e+07	1.25748
Q80TL0	PPM1E	Ppm1e	Protein phosphatase 1E (EC 3.1.3.16) (Ca(2+)/calmodulin-dependent protein kinase phosphatase N) (CaMKP-N) (CaMKP-nucleus) (CaMKN) (Partner of PIX 1) (Partner of PIX-alpha) (Partner of PIXA)	6.91271e+08	6.74851e+08	0.976246	3.76352e+08	4.73138e+08	1.25717
O35551	RABE1	Rabep1	Rab GTPase-binding effector protein 1 (Rabaptin-5) (Rabaptin-5alpha)	5.29446e+07	5.6481e+07	1.06679	4.82711e+07	6.06736e+07	1.25693
P15209	NTRK2	Ntrk2	BDNF/NT-3 growth factors receptor (EC 2.7.10.1) (GP145-TrkB/GP95-TrkB) (Trk-B) (Neurotrophic tyrosine kinase receptor type 2) (TrkB tyrosine kinase)	1.46657e+08	1.38035e+08	0.941206	1.10567e+08	1.38833e+08	1.25565
Q05BC3	EMAL1	Eml1	Echinoderm microtubule-associated protein-like 1 (EMAP-1)	4.93071e+07	3.68284e+07	0.746919	4.20418e+07	5.27893e+07	1.25564
P09528	FRIH	Fth1	Ferritin heavy chain (Ferritin H subunit) (EC 1.16.3.1) [Cleaved into: Ferritin heavy chain, N-terminally processed]	1.60757e+09	1.97224e+09	1.22684	9.43878e+08	1.18363e+09	1.254
Q9JHI5	IVD	Ivd	Isovaleryl-CoA dehydrogenase, mitochondrial (IVD) (EC 1.3.8.4) (Butyryl-CoA dehydrogenase) (EC 1.3.8.1)	4.29644e+08	4.39317e+08	1.02251	2.54516e+08	3.19006e+08	1.25338
Q640R3	HECAM	Hepacam	Hepatocyte cell adhesion molecule (Protein hepaCAM)	5.60987e+08	6.50796e+08	1.16009	5.77067e+08	7.23266e+08	1.25335
P17809	GTR1	Slc2a1	Solute carrier family 2, facilitated glucose transporter member 1 (Glucose transporter type 1, erythrocyte/brain) (GLUT-1) (GT1)	4.75725e+08	4.49786e+08	0.945475	5.28664e+08	6.62488e+08	1.25314
Q9CQV4	RETR3	Retreg3	Reticulophagy regulator 3	3.6849e+07	5.08843e+07	1.38089	2.74215e+07	3.43465e+07	1.25254
Q8VD04	GRAP1	Gripap1	GRIP1-associated protein 1 (GRASP-1) (HCMV-interacting protein) [Cleaved into: GRASP-1 C-terminal chain (30kDa C-terminus form)]	7.27178e+07	7.5935e+07	1.04424	6.00128e+07	7.51661e+07	1.2525
Q80W00	PP1RA	Ppp1r10	Serine/threonine-protein phosphatase 1 regulatory subunit 10 (MHC class I region proline-rich protein CAT53)	6.38921e+06	678411	0.106181	6.55916e+06	8.21275e+06	1.2521
Q9D3A9	TTYH1	Ttyh1	Protein tweety homolog 1 (mTTY1)	1.68032e+08	3.21224e+08	1.91169	2.80372e+08	3.51054e+08	1.2521
Q61503	5NTD	Nt5e	5'-nucleotidase (5'-NT) (EC 3.1.3.5) (Ecto-5'-nucleotidase) (CD antigen CD73)	10847095	678411	0.0625431	8.79697e+06	1.10146e+07	1.25209
O88738	BIRC6	Birc6	Baculoviral IAP repeat-containing protein 6 (EC 2.3.2.27) (BIR repeat-containing ubiquitin-conjugating enzyme) (BRUCE) (RING-type E3 ubiquitin transferase BIRC6) (Ubiquitin-conjugating BIR domain enzyme apollon) (APOLLON)	2.91747e+07	2.94896e+07	1.01079	1.81961e+07	2.27725e+07	1.2515
Q8R123	FAD1	Flad1	FAD synthase (EC 2.7.7.2) (FAD pyrophosphorylase) (FMN adenylyltransferase) (Flavin adenine dinucleotide synthase) [Includes: Molybdenum cofactor biosynthesis protein-like region; FAD synthase region]	41725075	5.84358e+07	1.4005	2.61864e+07	3.27717e+07	1.25148
Q8BKC5	IPO5	Ipo5	Importin-5 (Imp5) (Importin subunit beta-3) (Karyopherin beta-3) (Ran-binding protein 5) (RanBP5)	2.24436e+08	2.31662e+08	1.03219	1.62672e+08	2.03545e+08	1.25126
Q60571	CRHBP	Crhbp	Corticotropin-releasing factor-binding protein (CRF-BP) (CRF-binding protein) (Corticotropin-releasing hormone-binding protein) (CRH-BP)	678411	1.13749e+07	16.767	2.11172e+07	2.6419e+07	1.25107
E9Q5C9	NOLC1	Nolc1	Nucleolar and coiled-body phosphoprotein 1 (140 kDa nucleolar phosphoprotein) (Nopp140)	3.6194e+07	5.80509e+07	1.60388	3.5519e+07	4.44318e+07	1.25093
P40240	CD9	Cd9	CD9 antigen (CD antigen CD9)	1.35249e+09	1.89813e+09	1.40344	9.7117e+08	1.21357e+09	1.2496
Q9R1V7	ADA23	Adam23	Disintegrin and metalloproteinase domain-containing protein 23 (ADAM 23) (Metalloproteinase-like, disintegrin-like, and cysteine-rich protein 3) (MDC-3)				2.77259e+08	3.46432e+08	1.24949
Q9QZI9	SERC3	Serinc3	Serine incorporator 3 (Axotomy-induced glyco/Golgi protein 1) (AIGP-1) (Axotomy-induced glycoprotein 1) (Membrane protein TMS-1) (Tumor differentially expressed protein 1)	2.61971e+07	3.4614e+07	1.32129	4.58238e+07	5.72531e+07	1.24942
Q91YL2	RN126	Rnf126	E3 ubiquitin-protein ligase RNF126 (EC 2.3.2.27) (RING finger protein 126)	9.31149e+07	9.21926e+07	0.990095	4.61921e+07	5.76763e+07	1.24862
P08030	APT	Aprt	Adenine phosphoribosyltransferase (APRT) (EC 2.4.2.7)	1.3956e+08	1.45106e+08	1.03974	9.11235e+07	1.13773e+08	1.24856
Q8CEE7	RDH13	Rdh13	Retinol dehydrogenase 13 (EC 1.1.1.300)	678411	2.69543e+07	39.7316	5.04567e+07	6.29827e+07	1.24825
Q8K3C3	LZIC	Lzic	Protein LZIC (Leucine zipper and CTNNBIP1 domain-containing protein) (Leucine zipper and ICAT homologous domain-containing protein)	2.08644e+07	678411	0.0325153	3.71006e+07	4.62881e+07	1.24764
Q3TPE9	ANKY2	Ankmy2	Ankyrin repeat and MYND domain-containing protein 2	3.35424e+07	3.73328e+07	1.113	2.47156e+07	3.07687e+07	1.24491
Q91YJ3	THYN1	Thyn1	Thymocyte nuclear protein 1 (Thymocyte protein Thy28) (mThy28)	3.87694e+07	5.30957e+07	1.36953	2.13879e+07	2.66045e+07	1.24391
Q9CR67	TMM33	Tmem33	Transmembrane protein 33 (Protein DB83)	9.23598e+07	7.38453e+07	0.79954	7.30671e+07	9.08688e+07	1.24364
P46660	AINX	Ina	Alpha-internexin (Alpha-Inx) (66 kDa neurofilament protein) (NF-66) (Neurofilament-66)	2.98784e+09	3.48362e+09	1.16593	3.26316e+09	4.05727e+09	1.24336
Q9JHU9	INO1	Isyna1	Inositol-3-phosphate synthase 1 (IPS 1) (EC 5.5.1.4) (Myo-inositol 1-phosphate synthase) (MI-1-P synthase) (MIP synthase)	1.31102e+08	1.37165e+08	1.04625	1.23909e+08	1.53955e+08	1.24248
Q99L13	3HIDH	Hibadh	3-hydroxyisobutyrate dehydrogenase, mitochondrial (HIBADH) (EC 1.1.1.31)	2.22688e+08	2.23792e+08	1.00496	1.09364e+08	1.35876e+08	1.24242
Q3UMU9	HDGR2	Hdgfl2	Hepatoma-derived growth factor-related protein 2 (HRP-2)	3.79489e+07	2.9765e+07	0.784346	3.16348e+07	3.93031e+07	1.2424
Q9D1X0	NOL3	Nol3	Nucleolar protein 3 (Apoptosis repressor with CARD)	2.21943e+08	2.78859e+08	1.25644	1.61595e+08	2.00761e+08	1.24237
P54869	HMCS2	Hmgcs2	Hydroxymethylglutaryl-CoA synthase, mitochondrial (HMG-CoA synthase) (EC 2.3.3.10) (3-hydroxy-3-methylglutaryl coenzyme A synthase)				2.47697e+07	3.07482e+07	1.24136
Q3TY60	F131B	Fam131b	Protein FAM131B	7.39488e+07	7.75207e+07	1.0483	8.97513e+07	1.11376e+08	1.24094
Q99LS3	SERB	Psph	Phosphoserine phosphatase (PSP) (PSPase) (EC 3.1.3.3) (O-phosphoserine phosphohydrolase)	1.32983e+08	1.63346e+08	1.22832	1.21938e+08	1.51308e+08	1.24086
Q91WK0	LRRF2	Lrrfip2	Leucine-rich repeat flightless-interacting protein 2 (LRR FLII-interacting protein 2)	2.51257e+07	1.69375e+07	0.674112	2.8025e+07	3.47564e+07	1.24019
P23927	CRYAB	Cryab	Alpha-crystallin B chain (Alpha(B)-crystallin) (P23)	5.84595e+08	7.97475e+08	1.36415	5.90654e+08	7.32449e+08	1.24007
Q6NTA4	RRAGB	Rragb	Ras-related GTP-binding protein B (Rag B) (RagB) (EC 3.6.5.-)	1.68632e+07	2.35488e+07	1.39646	1.31991e+07	1.63531e+07	1.23895
P70211	DCC	Dcc	Netrin receptor DCC (Tumor suppressor protein DCC)	9.43961e+06	1.65659e+07	1.75494	1.16181e+07	1.43889e+07	1.23849
Q80U93	NU214	Nup214	Nuclear pore complex protein Nup214 (214 kDa nucleoporin) (Nucleoporin Nup214)	1.27436e+07	1.10356e+07	0.865969	8.45721e+06	1.04721e+07	1.23825
Q9DCZ1	GMPR1	Gmpr	GMP reductase 1 (GMPR 1) (EC 1.7.1.7) (Guanosine 5'-monophosphate oxidoreductase 1) (Guanosine monophosphate reductase 1)	2.35447e+08	2.41963e+08	1.02767	1.64698e+08	2.03876e+08	1.23788
Q8CFE4	SCYL2	Scyl2	SCY1-like protein 2 (Coated vesicle-associated kinase of 104 kDa)	7.82286e+07	7.41338e+07	0.947656	5.46222e+07	6.76023e+07	1.23763
P41241	CSK	Csk	Tyrosine-protein kinase CSK (EC 2.7.10.2) (C-Src kinase) (Protein-tyrosine kinase MPK-2) (p50CSK)	2.03801e+07	3.19303e+07	1.56674	2.21474e+07	2.73973e+07	1.23705
P51807	DYLT1	Dynlt1	Dynein light chain Tctex-type 1 (Activator of G-protein signaling 2) (AGS2) (T-complex testis-specific protein 1) (TCTEX-1)				1.54984e+07	1.9167e+07	1.23671
Q9WUA3	PFKAP	Pfkp	ATP-dependent 6-phosphofructokinase, platelet type (ATP-PFK) (PFK-P) (EC 2.7.1.11) (6-phosphofructokinase type C) (Phosphofructo-1-kinase isozyme C) (PFK-C) (Phosphohexokinase)	1.31608e+09	1.19237e+09	0.906004	1.23608e+09	1.52844e+09	1.23652
Q5XJY5	COPD	Arcn1	Coatomer subunit delta (Archain) (Delta-coat protein) (Delta-COP)	1.4807e+08	1.70447e+08	1.15112	9.40928e+07	1.16221e+08	1.23518
Q3UJD6	UBP19	Usp19	Ubiquitin carboxyl-terminal hydrolase 19 (EC 3.4.19.12) (Deubiquitinating enzyme 19) (Ubiquitin thioesterase 19) (Ubiquitin-specific-processing protease 19)	2.11869e+07	1.93199e+07	0.91188	9.82906e+06	1.21345e+07	1.23455
Q7TQH0	ATX2L	Atxn2l	Ataxin-2-like protein	6.04921e+07	6.66649e+07	1.10204	4.32386e+07	5.33715e+07	1.23435
O88507	CNTFR	Cntfr	Ciliary neurotrophic factor receptor subunit alpha (CNTF receptor subunit alpha) (CNTFR-alpha)	1.42926e+08	1.51895e+08	1.06275	1.85449e+08	2.28908e+08	1.23435
P62073	TIM10	Timm10	Mitochondrial import inner membrane translocase subunit Tim10	5.27931e+07	6.83115e+07	1.29395	7.87229e+07	9.71535e+07	1.23412
Q6PGL7	WASC2	Washc2	WASH complex subunit 2	3.89446e+07	4.1882e+07	1.07543	3.9314e+07	4.8497e+07	1.23358
Q80UW2	FBX2	Fbxo2	F-box only protein 2	5.98906e+08	6.29467e+08	1.05103	3.80597e+08	4.69459e+08	1.23348
Q8BMI0	FBX38	Fbxo38	F-box only protein 38 (Modulator of KLF7 activity) (MoKA)				2.25439e+07	2.77999e+07	1.23314
P56387	DYLT3	Dynlt3	Dynein light chain Tctex-type 3 (Protein 91/23) (T-complex-associated testis-expressed 1-like)	1.08939e+08	1.29498e+08	1.18873	6.96123e+07	8.58298e+07	1.23297
Q9QUR8	SEM7A	Sema7a	Semaphorin-7A (Semaphorin-K1) (Sema K1) (Semaphorin-L) (Sema L) (CD antigen CD108)	8.66612e+07	7.80699e+07	0.900863	1.18948e+08	1.46628e+08	1.23271
Q3TH73	TTYH2	Ttyh2	Protein tweety homolog 2 (mTTY2)				2.94454e+07	3.62787e+07	1.23207
Q8C561	LMBD2	Lmbrd2	G-protein coupled receptor-associated protein LMBRD2 (LMBR1 domain-containing protein 2)	2.40238e+07	678411	0.0282391	1.84237e+07	2.26927e+07	1.23171
Q9JM14	NT5C	Nt5c	5'(3')-deoxyribonucleotidase, cytosolic type (EC 3.1.3.-) (Cytosolic 5',3'-pyrimidine nucleotidase) (Deoxy-5'-nucleotidase 1) (dNT-1)	3.92267e+08	4.38336e+08	1.11744	2.90722e+08	3.57897e+08	1.23106
Q9DCC4	P5CR3	Pycr3	Pyrroline-5-carboxylate reductase 3 (P5C reductase 3) (P5CR 3) (EC 1.5.1.2) (Pyrroline-5-carboxylate reductase-like protein)	7.5935e+07	8.36925e+07	1.10216	1.16221e+08	1.43018e+08	1.23057
Q91YQ3	CSDC2	Csdc2	Cold shock domain-containing protein C2 (RNA-binding protein PIPPin)	1.36009e+07	1.76192e+07	1.29544	2.30954e+07	2.84204e+07	1.23056
Q9DC63	FBX3	Fbxo3	F-box only protein 3	2.33891e+07	2.00374e+07	0.856695	1.9915e+07	2.45061e+07	1.23054
Q3U0K8	OGFD1	Ogfod1	Prolyl 3-hydroxylase OGFOD1 (EC 1.14.11.-) (2-oxoglutarate and iron-dependent oxygenase domain-containing protein 1) (uS12 prolyl 3-hydroxylase)	2.96045e+07	1.82994e+07	0.618127	4.91612e+06	6.04739e+06	1.23011
Q9CPU4	MGST3	Mgst3	Microsomal glutathione S-transferase 3 (Microsomal GST-3) (Glutathione peroxidase MGST3) (EC 1.11.1.-) (Microsomal glutathione S-transferase III) (Microsomal GST-III)	3.68542e+08	3.76976e+08	1.02288	1.95848e+08	2.40879e+08	1.22993
A2AHG0	LZTS3	Lzts3	Leucine zipper putative tumor suppressor 3 (ProSAP-interacting protein 1) (ProSAPiP1)	1.65659e+07	20273775	1.22382	1.1648e+07	1.43235e+07	1.2297
P08207	S10AA	S100a10	Protein S100-A10 (Calpactin I light chain) (Calpactin-1 light chain) (Cellular ligand of annexin II) (S100 calcium-binding protein A10) (p10 protein) (p11)	678411	2.18895e+06	3.22658	8.67128e+07	1.06624e+08	1.22962
A3KFX0	5NT1A	Nt5c1a	Cytosolic 5'-nucleotidase 1A (cN1A) (EC 3.1.3.5) (Cytosolic 5'-nucleotidase IA) (cN-IA)	1.10648e+07	1.84095e+07	1.66379	1.46441e+07	1.79961e+07	1.2289
Q8BGQ1	SPE39	Vipas39	Spermatogenesis-defective protein 39 homolog (hSPE-39) (VPS33B-interacting protein in apical-basolateral polarity regulator) (VPS33B-interacting protein in polarity and apical restriction)	2.90765e+07	3.67935e+07	1.2654	3.0882e+07	3.79297e+07	1.22821
Q03517	SCG2	Scg2	Secretogranin-2 (Chromogranin-C) (Secretogranin II) (SgII) [Cleaved into: Secretoneurin (SN); Manserin]	9.41683e+07	1.08006e+08	1.14695	1.52344e+08	1.87007e+08	1.22753
Q8C1A5	THOP1	Thop1	Thimet oligopeptidase (EC 3.4.24.15)	1.92289e+08	1.92289e+08	1	1.74173e+08	2.13801e+08	1.22752
Q8R3G1	PP1R8	Ppp1r8	Nuclear inhibitor of protein phosphatase 1 (NIPP-1) (Protein phosphatase 1 regulatory inhibitor subunit 8)				1.91408e+07	2.34953e+07	1.2275
P27601	GNA13	Gna13	Guanine nucleotide-binding protein subunit alpha-13 (G alpha-13) (G-protein subunit alpha-13)	1.87822e+08	2.46574e+08	1.31281	1.72914e+08	2.1217e+08	1.22703
Q8BW96	KCC1D	Camk1d	Calcium/calmodulin-dependent protein kinase type 1D (EC 2.7.11.17) (CaM kinase I delta) (CaM-KI delta) (CaMKI delta) (CaM kinase ID) (CaMKI-like protein kinase) (CKLiK) (mCKLiK)	2.34982e+08	4.013e+08	1.70779	2.26057e+08	2.77259e+08	1.2265
O55091	IMPCT	Impact	Protein IMPACT (Imprinted and ancient gene protein)	1.45461e+08	1.3762e+08	0.94609	1.18502e+08	1.45255e+08	1.22576
Q9QZR0	RNF25	Rnf25	E3 ubiquitin-protein ligase RNF25 (EC 2.3.2.27) (RING finger protein 25) (RING finger protein AO7) (RING-type E3 ubiquitin transferase RNF25)				2.02148e+07	2.47744e+07	1.22556
P59913	PCMD1	Pcmtd1	Protein-L-isoaspartate O-methyltransferase domain-containing protein 1	1.6685e+07	1.67702e+07	1.00511	1.29285e+07	1.58417e+07	1.22534
Q9JMG7	HDGR3	Hdgfl3	Hepatoma-derived growth factor-related protein 3 (HRP-3)	3.76698e+08	3.69649e+08	0.981288	4.25384e+08	5.20981e+08	1.22473
Q3UMB5	SMCR8	Smcr8	Guanine nucleotide exchange protein SMCR8 (Smith-Magenis syndrome chromosomal region candidate gene 8 protein homolog)	2.7109e+07	2.18517e+07	0.806068	1.07796e+07	1.31991e+07	1.22445
Q9ES89	EXTL2	Extl2	Exostosin-like 2 (EC 2.4.1.223) (Alpha-1,4-N-acetylhexosaminyltransferase EXTL2) (Alpha-GalNAcT EXTL2) (EXT-related protein 2) (Glucuronyl-galactosyl-proteoglycan 4-alpha-N-acetylglucosaminyltransferase)	678411	8.88814e+07	131.014	5.80841e+07	7.11113e+07	1.22428
Q8BP40	PPA6	Acp6	Lysophosphatidic acid phosphatase type 6 (EC 3.1.3.2) (Acid phosphatase 6, lysophosphatidic) (Acid phosphatase-like protein 1) (PACPL1)	3.56559e+07	5.19372e+07	1.45662	2.69095e+07	3.29405e+07	1.22412
Q9DC51	GNAI3	Gnai3	Guanine nucleotide-binding protein G(i) subunit alpha-3 (G(i) alpha-3)	9.01666e+07	8.06265e+07	0.894194	8.42531e+07	1.03078e+08	1.22343
Q8R043	SIM29	Smim29	Small integral membrane protein 29 (Uncharacterized protein SMIM29)	678411	5.38215e+06	7.93347	9.03054e+06	1.10482e+07	1.22343
P26516	PSMD7	Psmd7	26S proteasome non-ATPase regulatory subunit 7 (26S proteasome regulatory subunit RPN8) (26S proteasome regulatory subunit S12) (Mov34 protein) (Proteasome subunit p40)	1.07438e+08	1.85386e+08	1.72551	1.43428e+08	1.75391e+08	1.22285
Q9Z1K5	ARI1	Arih1	E3 ubiquitin-protein ligase ARIH1 (EC 2.3.2.31) (Protein ariadne-1 homolog) (ARI-1) (RING-type E3 ubiquitin transferase ARIH1) (UbcH7-binding protein) (UbcM4-interacting protein 77) (Ubiquitin-conjugating enzyme E2-binding protein 1)	5.21327e+07	5.71664e+07	1.09655	4.11344e+07	5.02821e+07	1.22239
P56959	FUS	Fus	RNA-binding protein FUS (Protein pigpen)	8.73414e+08	7.89953e+08	0.904444	7.75691e+08	9.47114e+08	1.22099
P16388	KCNA1	Kcna1	Potassium voltage-gated channel subfamily A member 1 (MBK1) (MKI) (Voltage-gated potassium channel subunit Kv1.1)	1.01993e+08	1.01278e+08	0.992995	1.42635e+08	1.74066e+08	1.22036
Q01768	NDKB	Nme2	Nucleoside diphosphate kinase B (NDK B) (NDP kinase B) (EC 2.7.4.6) (Histidine protein kinase NDKB) (EC 2.7.13.3) (P18) (nm23-M2)	1.33032e+09	1.38549e+09	1.04147	1.06361e+09	1.2978e+09	1.22018
Q9CZH3	PSMG3	Psmg3	Proteasome assembly chaperone 3 (PAC-3) (mPAC3)	8.21186e+06	678411	0.0826136	1.12218e+07	1.36883e+07	1.2198
Q9QUJ7	ACSL4	Acsl4	Long-chain-fatty-acid--CoA ligase 4 (EC 6.2.1.3) (Arachidonate--CoA ligase) (EC 6.2.1.15) (Long-chain acyl-CoA synthetase 4) (LACS 4) (mACS4)	5.70627e+07	6.12684e+07	1.0737	4.81749e+07	5.87611e+07	1.21975
Q9Z0R9	FADS2	Fads2	Acyl-CoA 6-desaturase (EC 1.14.19.3) (Delta(6) fatty acid desaturase) (D6D) (Delta(6) desaturase) (Delta-6 desaturase) (Fatty acid desaturase 2)	1.8801e+07	1.31362e+07	0.698698	19583449	2.38699e+07	1.21888
Q61792	LASP1	Lasp1	LIM and SH3 domain protein 1 (LASP-1) (Metastatic lymph node gene 50 protein) (MLN 50)	5.56566e+08	5.62969e+08	1.0115	5.1122e+08	6.22967e+08	1.21859
Q8VDQ8	SIR2	Sirt2	NAD-dependent protein deacetylase sirtuin-2 (EC 2.3.1.286) (Regulatory protein SIR2 homolog 2) (SIR2-like protein 2) (mSIR2L2)	1.33718e+09	1.64183e+09	1.22783	1.508e+09	1.83431e+09	1.21638
Q99K01	PDXD1	Pdxdc1	Pyridoxal-dependent decarboxylase domain-containing protein 1 (EC 4.1.1.-)	4.22865e+07	5.61638e+07	1.32817	3.48702e+07	4.24142e+07	1.21635
Q8K2T1	NMRL1	Nmral1	NmrA-like family domain-containing protein 1	7.36256e+07	1.09181e+08	1.48292	1.13773e+08	1.38376e+08	1.21624
P46097	SYT2	Syt2	Synaptotagmin-2 (Inositol polyphosphate-binding protein) (IP4-binding protein) (IP4BP) (Synaptotagmin II) (SytII)	8.69583e+07	9.55637e+07	1.09896	1.07683e+08	1.30951e+08	1.21608
Q8K3H0	DP13A	Appl1	DCC-interacting protein 13-alpha (Dip13-alpha) (Adapter protein containing PH domain, PTB domain and leucine zipper motif 1)	1.84193e+08	1.99022e+08	1.08051	1.56604e+08	1.90425e+08	1.21597
Q8BGR9	UBCP1	Ublcp1	Ubiquitin-like domain-containing CTD phosphatase 1 (EC 3.1.3.16) (Nuclear proteasome inhibitor UBLCP1)	2.46548e+07	3.39175e+07	1.3757	3.74303e+07	4.55011e+07	1.21562
Q9R0N0	GALK1	Galk1	Galactokinase (EC 2.7.1.6) (Galactose kinase)	5.04099e+07	5.7969e+07	1.14995	4.08425e+07	4.96103e+07	1.21467
Q8BRN9	C2D1B	Cc2d1b	Coiled-coil and C2 domain-containing protein 1B (Five prime repressor element under dual repression-binding protein 2) (FRE under dual repression-binding protein 2) (Freud-2)	12223972	678411	0.0554984	8.98148e+06	1.09054e+07	1.21421
P62960	YBOX1	Ybx1	Y-box-binding protein 1 (YB-1) (CCAAT-binding transcription factor I subunit A) (CBF-A) (DNA-binding protein B) (DBPB) (Enhancer factor I subunit A) (EFI-A) (Nuclease-sensitive element-binding protein 1) (Y-box transcription factor)	1.30631e+07	2.27531e+07	1.74178	8.80653e+06	1.06874e+07	1.21358
Q80YN3	BCAS1	Bcas1	Breast carcinoma-amplified sequence 1 homolog (Novel amplified in breast cancer 1 homolog)	6.78948e+08	5.12035e+08	0.754159	6.59106e+08	7.99786e+08	1.21344
P15327	PMGE	Bpgm	Bisphosphoglycerate mutase (BPGM) (EC 5.4.2.4) (2,3-bisphosphoglycerate mutase, erythrocyte) (2,3-bisphosphoglycerate synthase) (EC 5.4.2.11) (BPG-dependent PGAM)	4.48126e+07	7.94538e+07	1.77302	4.21676e+07	5.11565e+07	1.21317
Q8CFV9	RIFK	Rfk	Riboflavin kinase (EC 2.7.1.26) (ATP:riboflavin 5'-phosphotransferase) (Flavokinase) (KOI-4)	2.15157e+07	3.39042e+07	1.57579	3.12369e+07	3.78472e+07	1.21162
Q6W8Q3	PC4L1	Pcp4l1	Purkinje cell protein 4-like protein 1 (PCP4-like protein 1)	8.92913e+07	4.647e+07	0.520432	1.83028e+08	2.21697e+08	1.21127
P83741	WNK1	Wnk1	Serine/threonine-protein kinase WNK1 (EC 2.7.11.1) (Protein kinase lysine-deficient 1) (Protein kinase with no lysine 1)	2.90387e+07	3.24129e+07	1.1162	2.38635e+07	2.88934e+07	1.21078
Q9CQ89	CUTA	Cuta	Protein CutA (Brain acetylcholinesterase putative membrane anchor)	1.58954e+08	1.90273e+08	1.19703	1.24857e+08	1.51161e+08	1.21067
P07724	ALBU	Alb	Albumin	3.1337e+09	2.0363e+09	0.649807	1.47677e+09	1.78673e+09	1.20989
Q62245	SOS1	Sos1	Son of sevenless homolog 1 (SOS-1) (mSOS-1)	2.62122e+07	1.07235e+07	0.409104	1.2085e+07	1.4617e+07	1.20951
Q9EP69	SAC1	Sacm1l	Phosphatidylinositol-3-phosphatase SAC1 (EC 3.1.3.64) (Phosphatidylinositol-4-phosphate phosphatase) (Suppressor of actin mutations 1-like protein)	1.12196e+08	1.22071e+08	1.08802	1.33194e+08	1.61065e+08	1.20925
Q3USB7	PLCL1	Plcl1	Inactive phospholipase C-like protein 1 (PLC-L1) (Phospholipase C-related but catalytically inactive protein) (PRIP)	7.07465e+07	1.09483e+08	1.54755	7.21744e+07	8.72764e+07	1.20924
Q9WV30	NFAT5	Nfat5	Nuclear factor of activated T-cells 5 (NF-AT5) (Rel domain-containing transcription factor NFAT5) (T-cell transcription factor NFAT5)				1.43757e+07	1.738e+07	1.20898
Q6PD03	2A5A	Ppp2r5a	Serine/threonine-protein phosphatase 2A 56 kDa regulatory subunit alpha isoform (PP2A B subunit isoform B'-alpha) (PP2A B subunit isoform B56-alpha) (PP2A B subunit isoform PR61-alpha) (PR61alpha) (PP2A B subunit isoform R5-alpha)	9.95394e+07	1.04373e+08	1.04856	7.42949e+07	8.98171e+07	1.20893
P10922	H10	H1-0	Histone H1.0 (Histone H1') (Histone H1(0)) (MyD196) [Cleaved into: Histone H1.0, N-terminally processed]	6.33125e+08	8.42837e+08	1.33123	8.49101e+08	1.02645e+09	1.20887
Q8CC86	PNCB	Naprt	Nicotinate phosphoribosyltransferase (NAPRTase) (EC 6.3.4.21) (Nicotinate phosphoribosyltransferase domain-containing protein 1)	678411	3.12879e+07	46.1193	9.6363e+06	1.1649e+07	1.20886
O88587	COMT	Comt	Catechol O-methyltransferase (EC 2.1.1.6)	1.13615e+08	1.12544e+08	0.990569	1.02119e+08	1.2342e+08	1.20859
Q921H9	COA7	Coa7	Cytochrome c oxidase assembly factor 7 (Beta-lactamase hcp-like protein) (Respiratory chain assembly factor 1) (Sel1 repeat-containing protein 1)	678411	4.55307e+07	67.1138	2.75974e+07	3.3353e+07	1.20855
Q9D486	CMIP	Cmip	C-Maf-inducing protein (c-Mip)	2.47795e+07	3.60601e+07	1.45524	3.65589e+07	4.41768e+07	1.20837
Q61330	CNTN2	Cntn2	Contactin-2 (Axonal glycoprotein TAG-1) (Axonin-1) (Transient axonal glycoprotein 1) (TAX-1)	1.42156e+08	1.53201e+08	1.0777	1.35286e+08	1.63438e+08	1.20809
Q7TMM9	TBB2A	Tubb2a	Tubulin beta-2A chain	9.55181e+09	1.55959e+10	1.63277	9.26707e+09	1.11949e+10	1.20803
Q6Y685	TACC1	Tacc1	Transforming acidic coiled-coil-containing protein 1	2.50657e+07	3.25738e+07	1.29954	2.09165e+07	2.52628e+07	1.20779
Q9JKS5	HABP4	Habp4	Intracellular hyaluronan-binding protein 4 (IHABP-4) (IHABP4) (Hyaluronic acid-binding protein 4)	6.85122e+07	6.41344e+07	0.936103	6.01154e+07	7.25679e+07	1.20714
O54991	CNTP1	Cntnap1	Contactin-associated protein 1 (Caspr) (Caspr1) (MHDNIV) (NCP1) (Neurexin IV) (Neurexin-4) (Paranodin)	5.5734e+08	5.53037e+08	0.99228	4.80605e+08	5.80078e+08	1.20697
Q7TT45	RRAGD	Rragd	Ras-related GTP-binding protein D (Rag D) (RagD) (EC 3.6.5.-)	1.65026e+07	1.86003e+07	1.12711	9.90127e+06	1.19494e+07	1.20685
P63143	KCAB1	Kcnab1	Voltage-gated potassium channel subunit beta-1 (EC 1.1.1.-) (K(+) channel subunit beta-1) (Kv-beta-1)	1.40869e+08	1.71744e+08	1.21917	8.22931e+07	9.9294e+07	1.20659
Q9ESM3	HPLN2	Hapln2	Hyaluronan and proteoglycan link protein 2 (Brain link protein 1)	9.305e+07	1.7987e+08	1.93304	2.73289e+08	3.29605e+08	1.20607
Q64735	CR1L	Cr1l	Complement component receptor 1-like protein (Complement regulatory protein Crry) (Protein p65)	4.12331e+07	1.35583e+08	3.28821	57751377	6.96123e+07	1.20538
Q2WF71	LRFN1	Lrfn1	Leucine-rich repeat and fibronectin type III domain-containing protein 1 (Synaptic adhesion-like molecule 2) (Synaptic differentiation-enhancing molecule 1)	2.11627e+07	2.41741e+07	1.1423	1.08609e+07	1.30895e+07	1.2052
Q6GQT9	NOMO1	Nomo1	Nodal modulator 1	9.60757e+07	6.99823e+07	0.728407	5.21047e+07	6.27678e+07	1.20465
Q9R0Q3	TMED2	Tmed2	Transmembrane emp24 domain-containing protein 2 (COPI-coated vesicle membrane protein p24) (Membrane protein p24A) (Sid 394) (p24 family protein beta-1) (p24beta1)	1.05208e+08	1.15496e+08	1.09779	9.22424e+07	111087370	1.2043
Q0GA42	CNNM1	Cnnm1	Metal transporter CNNM1 (Ancient conserved domain-containing protein 1) (mACDP1) (Cyclin-M1) (Cyclin-like protein 1) (CLP-1)	1.24042e+07	2.14356e+07	1.72809	1.40021e+07	1.68618e+07	1.20423
Q6VNB8	WDFY3	Wdfy3	WD repeat and FYVE domain-containing protein 3 (Beach domain, WD repeat and FYVE domain-containing protein 1) (BWF1)	3.37668e+07	5.76309e+07	1.70673	2.43593e+07	2.93326e+07	1.20416
Q9CXX9	CUED2	Cuedc2	CUE domain-containing protein 2	2.72138e+07	1.13343e+08	4.16489	1.79547e+07	2.16198e+07	1.20413
Q5ND34	WDR81	Wdr81	WD repeat-containing protein 81	2.0528e+07	1.17025e+07	0.570075	1.13068e+07	1.36148e+07	1.20413
P62322	LSM5	Lsm5	U6 snRNA-associated Sm-like protein LSm5	4.16936e+07	7.2991e+07	1.75065	3.31431e+07	3.9908e+07	1.20411
Q8R555	CRAC1	Crtac1	Cartilage acidic protein 1 (68 kDa chondrocyte-expressed protein) (CEP-68) (ASPIC) (Protein CRTAC1-B)	5.38453e+07	5.57876e+07	1.03607	4.80758e+07	5.78856e+07	1.20405
Q9EPK2	XRP2	Rp2	Protein XRP2	3.09652e+07	5.57507e+07	1.80043	5.19222e+07	6.24809e+07	1.20336
Q9CPZ8	COXM1	Cmc1	COX assembly mitochondrial protein homolog (Cmc1p)	2.39671e+07	2.5927e+07	1.08178	2.52628e+07	3.03971e+07	1.20324
Q8BYI8	F234B	Fam234b	Protein FAM234B	2.26173e+07	1.9619e+07	0.867435	3.80809e+07	4.57887e+07	1.20241
Q8C650	2022-09-10	Septin10	Septin-10	1.19541e+07	9.85892e+06	0.82473	1.20487e+07	1.44863e+07	1.20232
P24549	AL1A1	Aldh1a1	Aldehyde dehydrogenase 1A1 (EC 1.2.1.19) (EC 1.2.1.28) (EC 1.2.1.3) (EC 1.2.1.36) (3-deoxyglucosone dehydrogenase) (ALDH-E1) (ALHDII) (Aldehyde dehydrogenase family 1 member A1) (Aldehyde dehydrogenase, cytosolic) (Retinal dehydrogenase 1) (RALDH 1) (RalDH1)	2.028e+08	1.97078e+08	0.971784	1.40966e+08	1.6934e+08	1.20129
Q9CQ65	MTAP	Mtap	S-methyl-5'-thioadenosine phosphorylase (EC 2.4.2.28) (5'-methylthioadenosine phosphorylase) (MTA phosphorylase) (MTAP) (MTAPase)	4.74726e+07	6.00391e+07	1.26471	4.28599e+07	5.14646e+07	1.20076
Q8C3W1	CA198		Uncharacterized protein C1orf198 homolog	9.05213e+07	6.67039e+07	0.736886	8.71998e+07	1.04697e+08	1.20065
P62264	RS14	Rps14	40S ribosomal protein S14	3.5931e+08	3.50622e+08	0.975819	3.27391e+08	3.93013e+08	1.20044
Q9R0C8	VAV3	Vav3	Guanine nucleotide exchange factor VAV3 (VAV-3)	678411	8.54125e+06	12.5901	5.82424e+06	6990669	1.20027
A2ADY9	DDI2	Ddi2	Protein DDI1 homolog 2 (EC 3.4.23.-)	6.46654e+07	5.57152e+07	0.861593	3.96313e+07	4.75618e+07	1.20011
P52479	UBP10	Usp10	Ubiquitin carboxyl-terminal hydrolase 10 (EC 3.4.19.12) (Deubiquitinating enzyme 10) (Ubiquitin thioesterase 10) (Ubiquitin-specific-processing protease 10)	2.27819e+07	3.77355e+07	1.65638	2.99092e+07	3.5893e+07	1.20006
P61164	ACTZ	Actr1a	Alpha-centractin (Centractin) (ARP1) (Actin-RPV) (Centrosome-associated actin homolog)	8.09401e+08	8.11563e+08	1.00267	4.68561e+08	5.6223e+08	1.19991
P62855	RS26	Rps26	40S ribosomal protein S26	3.29033e+08	678411	0.00206183	2.59226e+08	3.11021e+08	1.19981
Q9JKB1	UCHL3	Uchl3	Ubiquitin carboxyl-terminal hydrolase isozyme L3 (UCH-L3) (EC 3.4.19.12) (Ubiquitin thioesterase L3)	4.35277e+08	4.59511e+08	1.05568	2.42744e+08	2.91246e+08	1.19981
Q80UP8	S20A2	Slc20a2	Sodium-dependent phosphate transporter 2 (Phosphate transporter 2) (PiT-2) (Solute carrier family 20 member 2) (Type III sodium-dependent phosphate transporter)				4.20788e+07	5.0486e+07	1.1998
Q6NXJ0	WWC2	Wwc2	Protein WWC2 (WW domain-containing protein 2)	2.24741e+07	678411	0.0301863	4.38424e+06	5.2585e+06	1.19941
Q9JIK5	DDX21	Ddx21	Nucleolar RNA helicase 2 (EC 3.6.4.13) (DEAD box protein 21) (Gu-alpha) (Nucleolar RNA helicase Gu) (Nucleolar RNA helicase II) (RH II/Gu)	678411	1.25402e+07	18.4847	7.92241e+06	9.50161e+06	1.19933
Q9JKK1	STX6	Stx6	Syntaxin-6	1.3008e+08	1.32667e+08	1.01989	8.64991e+07	1.03673e+08	1.19854
Q3UYG8	MACD2	Macrod2	ADP-ribose glycohydrolase MACROD2 (MACRO domain-containing protein 2) (O-acetyl-ADP-ribose deacetylase MACROD2) (EC 3.5.1.-) ([Protein ADP-ribosylaspartate] hydrolase MACROD2) (EC 3.2.2.-) ([Protein ADP-ribosylglutamate] hydrolase MACROD2) (EC 3.2.2.-)	1.895e+07	3.74354e+07	1.97548	1.80549e+07	2.16369e+07	1.19839
P70195	PSB7	Psmb7	Proteasome subunit beta type-7 (EC 3.4.25.1) (Macropain chain Z) (Multicatalytic endopeptidase complex chain Z) (Proteasome subunit Z)	3.0045e+08	3.05673e+08	1.01738	2.43222e+08	2.91449e+08	1.19828
O88704	HCN1	Hcn1	Potassium/sodium hyperpolarization-activated cyclic nucleotide-gated channel 1 (Brain cyclic nucleotide-gated channel 1) (BCNG-1) (Hyperpolarization-activated cation channel 2) (HAC-2)	8.97662e+07	8.22513e+07	0.916284	6.18807e+07	7.41266e+07	1.1979
Q9D8W7	OCAD2	Ociad2	OCIA domain-containing protein 2	2.31662e+08	1.98185e+08	0.855493	1.6934e+08	2.02486e+08	1.19574
P45952	ACADM	Acadm	Medium-chain specific acyl-CoA dehydrogenase, mitochondrial (MCAD) (EC 1.3.8.7)	1.93096e+08	1.62232e+08	0.840163	1.3608e+08	1.62672e+08	1.19542
Q9WTZ1	RBX2	Rnf7	RING-box protein 2 (Rbx2) (RING finger protein 7) (Sensitive to apoptosis gene protein)	3.83939e+07	4.47305e+07	1.16504	2.13957e+07	2.55734e+07	1.19526
Q9JLB0	PALS2	Pals2	Protein PALS2 (Dlgh4 protein) (MAGUK p55 subfamily member 6) (P55T protein) (Protein associated with Lin-7 2)	2.21862e+08	2.43699e+08	1.09842	1.8638e+08	2.2275e+08	1.19514
Q91YI0	ARLY	Asl	Argininosuccinate lyase (ASAL) (EC 4.3.2.1) (Arginosuccinase)	7.17093e+07	7.49641e+07	1.04539	7.88749e+07	9.42434e+07	1.19485
Q921I9	EXOS4	Exosc4	Exosome complex component RRP41 (Exosome component 4) (Ribosomal RNA-processing protein 41)	4.86557e+06	4910448	1.00922	6.14049e+06	7.33632e+06	1.19474
Q8BHH2	RAB9B	Rab9b	Ras-related protein Rab-9B	5.66966e+07	3.28266e+07	0.578987	2.96773e+07	3.54496e+07	1.1945
Q8BXQ2	PIGT	Pigt	GPI transamidase component PIG-T (Neuronal development-associated protein 7) (Phosphatidylinositol-glycan biosynthesis class T protein)	2.25134e+07	678411	0.0301336	2.86145e+06	3.418e+06	1.1945
P70452	STX4	Stx4	Syntaxin-4	2.3263e+07	3.01639e+07	1.29665	2.8814e+07	3.44168e+07	1.19444
Q6PAJ1	BCR	Bcr	Breakpoint cluster region protein (EC 2.7.11.1)	5.6609e+07	8.93845e+07	1.57898	4.60045e+07	5.49361e+07	1.19415
P70441	NHRF1	Slc9a3r1	Na(+)/H(+) exchange regulatory cofactor NHE-RF1 (NHERF-1) (Ezrin-radixin-moesin-binding phosphoprotein 50) (EBP50) (Regulatory cofactor of Na(+)/H(+) exchanger) (Sodium-hydrogen exchanger regulatory factor 1) (Solute carrier family 9 isoform A3 regulatory factor 1)	3.96613e+08	5.17648e+08	1.30517	3.49164e+08	4.16823e+08	1.19378
P61963	DCAF7	Dcaf7	DDB1- and CUL4-associated factor 7 (WD repeat-containing protein 68) (WD repeat-containing protein An11 homolog)	4.2441e+07	4.24609e+07	1.00047	3.10804e+07	3.70944e+07	1.1935
P61022	CHP1	Chp1	Calcineurin B homologous protein 1 (Calcineurin B-like protein) (Calcium-binding protein CHP) (Calcium-binding protein p22) (EF-hand calcium-binding domain-containing protein p22) (Sid 470) (p24)	1.07223e+08	9.79975e+07	0.913963	8.28448e+07	9.88703e+07	1.19344
Q9DCS2	MTL26	Mettl26	Methyltransferase-like 26	3.41087e+07	6.62396e+07	1.94202	7.61963e+07	9.09342e+07	1.19342
Q3THS6	METK2	Mat2a	S-adenosylmethionine synthase isoform type-2 (AdoMet synthase 2) (EC 2.5.1.6) (Methionine adenosyltransferase 2) (MAT 2)	1.79182e+08	2.4101e+08	1.34505	2.23267e+08	2.66205e+08	1.19232
Q9R0A0	PEX14	Pex14	Peroxisomal membrane protein PEX14 (PTS1 receptor-docking protein) (Peroxin-14) (Peroxisomal membrane anchor protein PEX14)	5.01551e+07	6.09201e+07	1.21463	4.97812e+07	5.93482e+07	1.19218
Q6IRU5	CLCB	Cltb	Clathrin light chain B (Lcb)	1.54715e+09	1.22586e+09	0.792339	1.26501e+09	1.508e+09	1.19208
Q3UVK0	ERMP1	Ermp1	Endoplasmic reticulum metallopeptidase 1 (EC 3.4.-.-) (Felix-ina)	4.07941e+07	4.05003e+07	0.992799	3.34708e+07	3.98853e+07	1.19164
Q91ZP9	NECA2	Necab2	N-terminal EF-hand calcium-binding protein 2 (EF-hand calcium-binding protein 2) (Neuronal calcium-binding protein 2)	1.51895e+08	1.53934e+08	1.01342	1.30712e+08	1.55702e+08	1.19118
Q9D074	MGRN1	Mgrn1	E3 ubiquitin-protein ligase MGRN1 (EC 2.3.2.27) (Mahogunin RING finger protein 1) (RING-type E3 ubiquitin transferase MGRN1)	1.05941e+07	1.26425e+07	1.19336	5.56155e+06	6.61926e+06	1.19018
Q9D9H8	CB069		Mitochondrial protein C2orf69 homolog	1.24326e+07	2.43631e+07	1.95962	1.63074e+07	1.94033e+07	1.18985
Q8BWT5	DIP2A	Dip2a	Disco-interacting protein 2 homolog A (DIP2 homolog A) (EC 6.2.1.1)	1.12407e+07	2.33963e+07	2.08139	24622084	2.92919e+07	1.18966
P47867	SCG3	Scg3	Secretogranin-3 (Secretogranin III) (SgIII)	2.80221e+07	4.22865e+07	1.50904	4.91897e+07	5.85136e+07	1.18955
Q9WTQ5	AKA12	Akap12	A-kinase anchor protein 12 (AKAP-12) (Germ cell lineage protein gercelin) (Src-suppressed C kinase substrate) (SSeCKS)	1.4356e+07	2.12892e+07	1.48295	6.50914e+07	7.73901e+07	1.18895
Q8VBW6	ULA1	Nae1	NEDD8-activating enzyme E1 regulatory subunit (Amyloid beta precursor protein-binding protein 1, 59 kDa) (APP-BP1) (Amyloid protein-binding protein 1)	1.41342e+08	1.55693e+08	1.10154	1.03212e+08	1.22705e+08	1.18887
P16406	AMPE	Enpep	Glutamyl aminopeptidase (EAP) (EC 3.4.11.7) (Aminopeptidase A) (AP-A) (BP-1/6C3 antigen) (CD antigen CD249)	784458	3.34518e+06	4.26432	1.18494e+07	1.40871e+07	1.18884
Q9CZM2	RL15	Rpl15	60S ribosomal protein L15	3.96283e+08	3.56414e+08	0.899393	2.68592e+08	3.19275e+08	1.1887
P60879	SNP25	Snap25	Synaptosomal-associated protein 25 (SNAP-25) (Super protein) (SUP) (Synaptosomal-associated 25 kDa protein)	3.24049e+09	2.90493e+09	0.896449	2.78377e+09	3.30838e+09	1.18846
Q9D1J1	NECP2	Necap2	Adaptin ear-binding coat-associated protein 2 (NECAP endocytosis-associated protein 2) (NECAP-2)	4.46834e+07	4.65299e+07	1.04132	3.53758e+07	4.20418e+07	1.18843
Q6I6G8	HECW2	Hecw2	E3 ubiquitin-protein ligase HECW2 (EC 2.3.2.26) (HECT, C2 and WW domain-containing protein 2) (HECT-type E3 ubiquitin transferase HECW2) (NEDD4-like E3 ubiquitin-protein ligase 2)	1.63378e+07	1.40951e+07	0.862731	1.34754e+07	1.60126e+07	1.18828
Q9Z2W1	STK25	Stk25	Serine/threonine-protein kinase 25 (EC 2.7.11.1) (Ste20-like kinase) (Sterile 20/oxidant stress-response kinase 1) (SOK-1) (Ste20/oxidant stress response kinase 1)	1.72719e+07	2.35367e+07	1.36272	1.27003e+07	1.50855e+07	1.18781
Q8BHW2	OSCP1	Oscp1	Protein OSCP1	6.56693e+07	7.67883e+07	1.16932	5.19961e+07	6.17456e+07	1.1875
Q9QUP5	HPLN1	Hapln1	Hyaluronan and proteoglycan link protein 1 (Cartilage-linking protein 1) (Cartilage-link protein) (Proteoglycan link protein)	1.03745e+09	9.93063e+08	0.957212	9.85961e+08	1.16967e+09	1.18633
Q920P3	BRNP1	Brinp1	BMP/retinoic acid-inducible neural-specific protein 1 (Deleted in bladder cancer protein 1 homolog)	5.57152e+07	5.66966e+07	1.01761	5.51485e+07	6.54095e+07	1.18606
Q9D6K5	SYJ2B	Synj2bp	Synaptojanin-2-binding protein (Activin receptor-interacting protein 2) (Activin receptor-interacting protein 4) (Mitochondrial outer membrane protein 25)	1.12099e+08	1.11675e+08	0.99622	7.80922e+07	9.25954e+07	1.18572
O08582	GTPB1	Gtpbp1	GTP-binding protein 1 (G-protein 1) (GP-1) (GP1)	4.22044e+07	6.93362e+07	1.64287	3.43662e+07	4.07034e+07	1.1844
P37040	NCPR	Por	NADPH--cytochrome P450 reductase (CPR) (P450R) (EC 1.6.2.4)	2.38293e+08	2.08774e+08	0.876124	1.79236e+08	2.12246e+08	1.18417
Q60710	SAMH1	Samhd1	Deoxynucleoside triphosphate triphosphohydrolase SAMHD1 (dNTPase) (EC 3.1.5.-) (Interferon-gamma-inducible protein Mg11) (SAM domain and HD domain-containing protein 1) (mSAMHD1)	1.90702e+07	2.77454e+07	1.45491	1.89826e+07	2.2465e+07	1.18346
P08551	NFL	Nefl	Neurofilament light polypeptide (NF-L) (68 kDa neurofilament protein) (Neurofilament triplet L protein)	3.48021e+09	3.97745e+09	1.14288	3.90306e+09	4.61729e+09	1.18299
O35682	MYADM	Myadm	Myeloid-associated differentiation marker (Myeloid up-regulated protein)	2.79477e+08	2.66671e+08	0.954178	2.28681e+08	2.70418e+08	1.18251
P0DP60	LYNX1	Lynx1	Ly-6/neurotoxin-like protein 1 (GC26)	3.81976e+08	3.88369e+08	1.01674	2.04305e+08	2.4154e+08	1.18225
Q61735	CD47	Cd47	Leukocyte surface antigen CD47 (Integrin-associated protein) (IAP) (CD antigen CD47)	6.98004e+08	5.87062e+08	0.841058	6.78792e+08	8.02232e+08	1.18185
Q8BGN2	CD033	D3Ertd751e	UPF0462 protein C4orf33 homolog	3.81745e+07	3.75498e+07	0.983638	1.97168e+07	2.33012e+07	1.18179
Q99K51	PLST	Pls3	Plastin-3 (T-plastin)	2.63057e+08	2.70474e+08	1.02819	2.67263e+08	3.15832e+08	1.18173
P62482	KCAB2	Kcnab2	Voltage-gated potassium channel subunit beta-2 (EC 1.1.1.-) (K(+) channel subunit beta-2) (Kv-beta-2) (Neuroimmune protein F5)	8.20884e+08	7.16156e+08	0.87242	4.5055e+08	5.32416e+08	1.1817
Q80WT0	JPH4	Jph4	Junctophilin-4 (JP-4) (Junctophilin-like 1 protein)	6.08838e+06	678411	0.111427	8.85666e+06	1.04617e+07	1.18122
P84096	RHOG	Rhog	Rho-related GTP-binding protein RhoG (Sid 10750)	4.24776e+08	5.34117e+08	1.25741	3.25925e+08	3.84871e+08	1.18086
P05063	ALDOC	Aldoc	Fructose-bisphosphate aldolase C (EC 4.1.2.13) (Aldolase 3) (Brain-type aldolase) (Scrapie-responsive protein 2) (Zebrin II)	3.61382e+09	3.71589e+09	1.02825	3.14457e+09	3.71248e+09	1.1806
P02535	K1C10	Krt10	Keratin, type I cytoskeletal 10 (56 kDa cytokeratin) (Cytokeratin-10) (CK-10) (Keratin, type I cytoskeletal 59 kDa) (Keratin-10) (K10)	1.22071e+08	2.3248e+08	1.90446	1.46628e+08	1.73094e+08	1.1805
Q6ZQ82	RHG26	Arhgap26	Rho GTPase-activating protein 26 (Rho-type GTPase-activating protein 26)	3.18337e+07	2.03906e+07	0.640537	3.52374e+07	4.15977e+07	1.1805
Q569Z6	TR150	Thrap3	Thyroid hormone receptor-associated protein 3 (Thyroid hormone receptor-associated protein complex 150 kDa component) (Trap150)	6.52855e+07	5.36814e+07	0.822256	6.76678e+07	7.9847e+07	1.17998
P55088	AQP4	Aqp4	Aquaporin-4 (AQP-4) (Mercurial-insensitive water channel) (MIWC) (WCH4)	1.14317e+09	1.05821e+09	0.925682	1.14251e+09	1.34791e+09	1.17978
P56565	S10A1	S100a1	Protein S100-A1 (S-100 protein alpha chain) (S-100 protein subunit alpha) (S100 calcium-binding protein A1)	3.05852e+08	4.57031e+08	1.49429	2.62584e+08	3.09764e+08	1.17968
Q9DBG9	TX1B3	Tax1bp3	Tax1-binding protein 3 (Tax interaction protein 1) (TIP-1)	678411	2.93662e+07	43.2867	2.00709e+07	2.3673e+07	1.17947
P20352	TF	F3	Tissue factor (TF) (Coagulation factor III) (CD antigen CD142)	3.94042e+07	5.33076e+07	1.35284	62066394	7.32027e+07	1.17943
P10852	4F2	Slc3a2	4F2 cell-surface antigen heavy chain (4F2hc) (Solute carrier family 3 member 2) (CD antigen CD98)	1.05334e+08	2.91288e+08	2.76538	2.64191e+08	3.11581e+08	1.17938
Q9D8S9	BOLA1	Bola1	BolA-like protein 1	3.48848e+07	3.7608e+07	1.07806	4.96349e+07	5.85272e+07	1.17916
Q922B1	MACD1	Macrod1	ADP-ribose glycohydrolase MACROD1 (MACRO domain-containing protein 1) (O-acetyl-ADP-ribose deacetylase MACROD1) (EC 3.1.1.106) (Protein LRP16) ([Protein ADP-ribosylaspartate] hydrolase MACROD1) (EC 3.2.2.-) ([Protein ADP-ribosylglutamate] hydrolase MACROD1) (EC 3.2.2.-)	1.94175e+08	1.96511e+08	1.01203	1.15736e+08	1.36449e+08	1.17897
Q99KC8	VMA5A	Vwa5a	von Willebrand factor A domain-containing protein 5A (Loss of heterozygosity 11 chromosomal region 2 gene A protein homolog)	9.74134e+07	1.10218e+08	1.13145	8.52619e+07	1.00513e+08	1.17887
O54818	TPD53	Tpd52l1	Tumor protein D53 (mD53) (Tumor protein D52-like 1)	3.38235e+07	3.03065e+07	0.89602	1.87079e+07	2.20465e+07	1.17846
Q9CQX8	RT36	Mrps36	28S ribosomal protein S36, mitochondrial (MRP-S36) (S36mt) (Alpha-ketoglutarate dehydrogenase component 4)	2.9711e+08	3.08305e+08	1.03768	4.24444e+08	5.00135e+08	1.17833
Q6PCN3	TTBK1	Ttbk1	Tau-tubulin kinase 1 (EC 2.7.11.1)	1.07451e+07	2.00778e+07	1.86855	1.47863e+07	1.74194e+07	1.17808
Q6PDY2	AEDO	Ado	2-aminoethanethiol dioxygenase (EC 1.13.11.19) (Cysteamine dioxygenase)	1.1411e+08	1.09394e+08	0.958664	8.67232e+07	1.02119e+08	1.17753
Q99K10	NLGN1	Nlgn1	Neuroligin-1	4.42922e+07	3.50601e+07	0.791565	2.88438e+07	3.39544e+07	1.17718
Q80WW9	DDRGK	Ddrgk1	DDRGK domain-containing protein 1 (UFM1-binding and PCI domain-containing protein 1)	6.83528e+06	1.31853e+07	1.929	2.7242e+07	3.20528e+07	1.1766
Q922P8	T132A	Tmem132a	Transmembrane protein 132A (HSPA5-binding protein 1)	7.47471e+06	1.13679e+07	1.52085	1.25024e+07	1.47071e+07	1.17634
Q99P88	NU155	Nup155	Nuclear pore complex protein Nup155 (155 kDa nucleoporin) (Nucleoporin Nup155)	2.76397e+07	2.85749e+07	1.03383	2.09836e+07	2.46799e+07	1.17615
Q6ZPQ6	PITM2	Pitpnm2	Membrane-associated phosphatidylinositol transfer protein 2 (Drosophila retinal degeneration B homolog 2) (RdgB2) (Phosphatidylinositol transfer protein, membrane-associated 2) (PITPnm 2) (Pyk2 N-terminal domain-interacting receptor 3) (NIR-3)	1.1234e+08	9.14375e+07	0.813937	7.73529e+07	9.09679e+07	1.17601
Q61074	PPM1G	Ppm1g	Protein phosphatase 1G (EC 3.1.3.16) (Fibroblast growth factor-inducible protein 13) (FIN13) (Protein phosphatase 1C) (Protein phosphatase 2C isoform gamma) (PP2C-gamma) (Protein phosphatase magnesium-dependent 1 gamma)	5.20512e+07	4.86949e+07	0.93552	3.62787e+07	4.26584e+07	1.17585
Q61239	FNTA	Fnta	Protein farnesyltransferase/geranylgeranyltransferase type-1 subunit alpha (EC 2.5.1.58) (EC 2.5.1.59) (CAAX farnesyltransferase subunit alpha) (FTase-alpha) (Ras proteins prenyltransferase subunit alpha) (Type I protein geranyl-geranyltransferase subunit alpha) (GGTase-I-alpha)	4.91639e+07	5.8015e+07	1.18003	4.27011e+07	5.01928e+07	1.17545
P28352	APEX1	Apex1	DNA-(apurinic or apyrimidinic site) endonuclease (EC 3.1.-.-) (APEX nuclease) (APEN) (Apurinic-apyrimidinic endonuclease 1) (AP endonuclease 1) (REF-1) (Redox factor-1) [Cleaved into: DNA-(apurinic or apyrimidinic site) endonuclease, mitochondrial]	2.28488e+08	2.4955e+08	1.09218	1.56454e+08	1.83896e+08	1.1754
Q8BVG4	DPP9	Dpp9	Dipeptidyl peptidase 9 (DP9) (EC 3.4.14.5) (Dipeptidyl peptidase IX) (DPP IX) (Dipeptidyl peptidase-like protein 9) (DPLP9)	2.0648e+07	1.42143e+07	0.688411	2.28873e+07	2.69016e+07	1.1754
Q61233	PLSL	Lcp1	Plastin-2 (65 kDa macrophage protein) (L-plastin) (Lymphocyte cytosolic protein 1) (LCP-1) (pp65)	5.37476e+07	8.57943e+07	1.59624	3.73004e+07	4.38097e+07	1.17451
Q7TNC4	LC7L2	Luc7l2	Putative RNA-binding protein Luc7-like 2 (CGI-74 homolog)	3.36944e+07	3.10373e+07	0.92114	3.55475e+07	4.17492e+07	1.17446
Q62172	RBP1	Ralbp1	RalA-binding protein 1 (RalBP1) (Dinitrophenyl S-glutathione ATPase) (DNP-SG ATPase) (EC 7.6.2.2) (EC 7.6.2.3) (Ral-interacting protein 1)	3.13005e+07	2.88033e+07	0.920219	3.33838e+07	3.91945e+07	1.17406
Q9WVK4	EHD1	Ehd1	EH domain-containing protein 1 (PAST homolog 1) (mPAST1)	1.84935e+08	1.90106e+08	1.02796	1.67551e+08	1.96683e+08	1.17387
Q9DBZ5	EIF3K	Eif3k	Eukaryotic translation initiation factor 3 subunit K (eIF3k) (Eukaryotic translation initiation factor 3 subunit 12) (eIF-3 p25)	7.74937e+07	1.02561e+08	1.32347	9.73962e+07	1.14303e+08	1.17358
Q00493	CBPE	Cpe	Carboxypeptidase E (CPE) (EC 3.4.17.10) (Carboxypeptidase H) (CPH) (Enkephalin convertase) (Prohormone-processing carboxypeptidase)	5.24933e+08	5.19729e+08	0.990086	4.23478e+08	4.96954e+08	1.17351
Q8CCS6	PABP2	Pabpn1	Polyadenylate-binding protein 2 (PABP-2) (Poly(A)-binding protein 2) (Nuclear poly(A)-binding protein 1) (Poly(A)-binding protein II) (PABII) (Polyadenylate-binding nuclear protein 1)	1.44703e+08	8.8728e+07	0.613173	1.03924e+08	1.21938e+08	1.17334
Q6P1F6	2ABA	Ppp2r2a	Serine/threonine-protein phosphatase 2A 55 kDa regulatory subunit B alpha isoform (PP2A subunit B isoform B55-alpha) (PP2A subunit B isoform PR55-alpha) (PP2A subunit B isoform R2-alpha) (PP2A subunit B isoform alpha)	4.60983e+08	3.05987e+08	0.663771	3.52953e+08	4.14005e+08	1.17298
Q8BGR2	LRC8D	Lrrc8d	Volume-regulated anion channel subunit LRRC8D (Leucine-rich repeat-containing protein 5) (Leucine-rich repeat-containing protein 8D)	1.55634e+07	1.26296e+07	0.811491	6.83702e+06	8.01864e+06	1.17283
Q9WU40	MAN1	Lemd3	Inner nuclear membrane protein Man1 (LEM domain-containing protein 3)	1.02781e+07	8.22637e+06	0.800377	1.48909e+07	1.74644e+07	1.17282
P63280	UBC9	Ube2i	SUMO-conjugating enzyme UBC9 (EC 2.3.2.-) (RING-type E3 SUMO transferase UBC9) (SUMO-protein ligase) (Ubiquitin carrier protein 9) (mUBC9) (Ubiquitin carrier protein I) (Ubiquitin-conjugating enzyme E2 I) (Ubiquitin-protein ligase I)	1.82049e+08	1.19321e+08	0.655434	1.38916e+08	1.62892e+08	1.17259
Q0VBD0	ITB8	Itgb8	Integrin beta-8	6.99918e+07	7.54273e+07	1.07766	6.82497e+07	7.99788e+07	1.17186
Q91ZM2	SH2B1	Sh2b1	SH2B adapter protein 1 (Pro-rich, PH and SH2 domain-containing signaling mediator) (PSM) (SH2 domain-containing protein 1B) (SH2-B PH domain-containing signaling mediator 1)	3.7578e+07	3.65304e+07	0.972121	2.74862e+07	3.21999e+07	1.17149
Q9CZ16	T178A	Tmem178a	Transmembrane protein 178A	678411	5.34499e+06	7.87869	8.79386e+06	1.02995e+07	1.17122
P57776	EF1D	Eef1d	Elongation factor 1-delta (EF-1-delta)	4.85764e+08	3.63739e+08	0.748798	3.5835e+08	4.19616e+08	1.17097
Q9JKB3	YBOX3	Ybx3	Y-box-binding protein 3 (Cold shock domain-containing protein A) (DNA-binding protein A) (Y-box protein 3)	4.57487e+06	5.21914e+06	1.14083	4.1719e+06	4884891	1.1709
P60670	NPL4	Nploc4	Nuclear protein localization protein 4 homolog (Protein NPL4)	4.53163e+07	5.16022e+07	1.13871	3.93031e+07	4.60156e+07	1.17079
Q9CY73	RM44	Mrpl44	39S ribosomal protein L44, mitochondrial (L44mt) (MRP-L44) (EC 3.1.26.-)	678411	9.16945e+06	13.5161	5.08746e+06	5.95566e+06	1.17066
P68181	KAPCB	Prkacb	cAMP-dependent protein kinase catalytic subunit beta (PKA C-beta) (EC 2.7.11.11)	2.23014e+08	2.63393e+08	1.18106	2.8337e+08	3.31716e+08	1.17061
Q7TNE3	SPAG7	Spag7	Sperm-associated antigen 7	6.62873e+06	7.59207e+06	1.14533	1.03369e+07	1.20998e+07	1.17055
Q9CZJ0	MPPD2	Mpped2	Metallophosphoesterase MPPED2 (EC 3.1.-.-) (Metallophosphoesterase domain-containing protein 2)	1.44266e+07	1.82823e+07	1.26727	1.23062e+07	1.4403e+07	1.17039
Q80XQ2	TBCD5	Tbc1d5	TBC1 domain family member 5	1.41528e+07	7.26281e+06	0.51317	1.36006e+07	1.59137e+07	1.17008
Q62048	PEA15	Pea15	Astrocytic phosphoprotein PEA-15 (15 kDa phosphoprotein enriched in astrocytes)	1.16726e+09	1.24144e+09	1.06355	1.27949e+09	1.49669e+09	1.16976
O08997	ATOX1	Atox1	Copper transport protein ATOX1 (Metal transport protein ATX1)	6.28937e+07	678411	0.0107866	6.71669e+07	7.85617e+07	1.16965
Q9R1L5	MAST1	Mast1	Microtubule-associated serine/threonine-protein kinase 1 (EC 2.7.11.1) (Syntrophin-associated serine/threonine-protein kinase)	5.26042e+07	2.58039e+07	0.490529	1.68462e+07	1.97031e+07	1.16959
O70152	DPM1	Dpm1	Dolichol-phosphate mannosyltransferase subunit 1 (EC 2.4.1.83) (Dolichol-phosphate mannose synthase subunit 1) (DPM synthase subunit 1) (Dolichyl-phosphate beta-D-mannosyltransferase subunit 1) (Mannose-P-dolichol synthase subunit 1) (MPD synthase)	3.98083e+07	4.688e+07	1.17764	3.02216e+07	3.53395e+07	1.16935
P51859	HDGF	Hdgf	Hepatoma-derived growth factor (HDGF)	2.08281e+08	2.89389e+08	1.38942	2.06623e+08	2.41603e+08	1.16929
Q03717	KCNB1	Kcnb1	Potassium voltage-gated channel subfamily B member 1 (Voltage-gated potassium channel subunit Kv2.1) (mShab)	1.82994e+07	678411	0.0370729	1.48029e+07	1.73016e+07	1.1688
O70166	STMN3	Stmn3	Stathmin-3 (Hippocampus abundant transcript 3) (SCG10-like protein) (SCG10-related protein HiAT3)	678411	4.55078e+07	67.0801	5.132e+07	5.99605e+07	1.16836
Q8BU33	HACL2	Ilvbl	2-hydroxyacyl-CoA lyase 2 (EC 4.1.2.-) (Acetolactate synthase-like protein) (IlvB-like protein)	1.99471e+07	3.29264e+07	1.65069	2.59944e+07	3.03401e+07	1.16717
Q9Z0V1	KCND3	Kcnd3	Potassium voltage-gated channel subfamily D member 3 (Voltage-gated potassium channel subunit Kv4.3)	678411	1.2183e+07	17.9581	2.79757e+07	3.2633e+07	1.16648
O70194	EIF3D	Eif3d	Eukaryotic translation initiation factor 3 subunit D (eIF3d) (Eukaryotic translation initiation factor 3 subunit 7) (eIF-3-zeta) (eIF3 p66)	1.29134e+08	7.40544e+07	0.573469	7.25579e+08	8.46342e+08	1.16644
Q8CE90	MP2K7	Map2k7	Dual specificity mitogen-activated protein kinase kinase 7 (MAP kinase kinase 7) (MAPKK 7) (EC 2.7.12.2) (JNK-activating kinase 2) (MAPK/ERK kinase 7) (MEK 7) (c-Jun N-terminal kinase kinase 2) (JNK kinase 2) (JNKK 2)	4.80033e+07	5.13769e+07	1.07028	3.55593e+07	4.14718e+07	1.16627
P28271	ACOHC	Aco1	Cytoplasmic aconitate hydratase (Aconitase) (EC 4.2.1.3) (Citrate hydro-lyase) (Iron regulatory protein 1) (IRP1) (Iron-responsive element-binding protein 1) (IRE-BP 1)	2.46574e+08	3.84981e+08	1.56132	3.36442e+08	3.92262e+08	1.16591
Q8BGN3	ENPP6	Enpp6	Glycerophosphocholine cholinephosphodiesterase ENPP6 (GPC-Cpde) (EC 3.1.4.-) (EC 3.1.4.38) (Choline-specific glycerophosphodiester phosphodiesterase) (Ectonucleotide pyrophosphatase/phosphodiesterase family member 6) (E-NPP 6) (NPP-6)	1.43346e+08	2.25097e+08	1.57031	1.48625e+08	1.73279e+08	1.16588
P07356	ANXA2	Anxa2	Annexin A2 (Annexin II) (Annexin-2) (Calpactin I heavy chain) (Calpactin-1 heavy chain) (Chromobindin-8) (Lipocortin II) (Placental anticoagulant protein IV) (PAP-IV) (Protein I) (p36)	6.87832e+07	5.25806e+07	0.764439	1.20353e+08	1.40241e+08	1.16525
Q91V81	RBM42	Rbm42	RNA-binding protein 42 (RNA-binding motif protein 42)	1.18219e+07	8.54466e+06	0.722784	1.28441e+07	1.49638e+07	1.16504
Q99LC8	EI2BA	Eif2b1	Translation initiation factor eIF-2B subunit alpha (eIF-2B GDP-GTP exchange factor subunit alpha)	1.29827e+07	1.75662e+07	1.35305	2.84821e+07	3.31676e+07	1.16451
P63044	VAMP2	Vamp2	Vesicle-associated membrane protein 2 (VAMP-2) (Synaptobrevin-2)	2.55552e+09	3.24049e+09	1.26803	2.63688e+09	3.0702e+09	1.16433
Q9QYY0	GAB1	Gab1	GRB2-associated-binding protein 1 (GRB2-associated binder 1) (Growth factor receptor bound protein 2-associated protein 1)	1.26558e+07	678411	0.0536048	1.14037e+07	1.32684e+07	1.16351
Q80WM4	HPLN4	Hapln4	Hyaluronan and proteoglycan link protein 4 (Brain link protein 2)	3.00892e+08	3.32824e+08	1.10613	2.89628e+08	3.36762e+08	1.16274
Q8R480	NUP85	Nup85	Nuclear pore complex protein Nup85 (85 kDa nucleoporin) (FROUNT) (Nucleoporin Nup85) (Pericentrin-1)	7.87226e+07	678411	0.00861774	1.35214e+07	1.57152e+07	1.16225
Q4VAA2	CDV3	Cdv3	Protein CDV3 (Carnitine deficiency-associated protein 3) (Tyrosine-phosphorylated protein 36) (TPP36)	1.74546e+08	678411	0.00388673	1.60099e+08	1.86071e+08	1.16223
Q9R062	GLYG	Gyg1	Glycogenin-1 (GN-1) (GN1) (EC 2.4.1.186)	3.79717e+07	6.83218e+07	1.79928	3.74619e+07	4.35299e+07	1.16198
Q9D0F9	PGM1	Pgm1	Phosphoglucomutase-1 (PGM 1) (EC 5.4.2.2) (Glucose phosphomutase 1) (Phosphoglucomutase-2)	5.84301e+08	5.24525e+08	0.897697	5.28309e+08	6.13822e+08	1.16186
Q9DC50	OCTC	Crot	Peroxisomal carnitine O-octanoyltransferase (COT) (EC 2.3.1.137)	2.47918e+07	1.90355e+07	0.767815	1.50665e+07	1.75052e+07	1.16186
Q80WQ2	VAC14	Vac14	Protein VAC14 homolog	2.24394e+07	3.96902e+07	1.76878	5.63185e+07	6.54301e+07	1.16179
Q8CHP8	PGP	Pgp	Glycerol-3-phosphate phosphatase (G3PP) (EC 3.1.3.21) (Aspartate-based ubiquitous Mg(2+)-dependent phosphatase) (AUM) (EC 3.1.3.48) (Phosphoglycolate phosphatase) (PGP)	3.19045e+08	4.76214e+08	1.49262	2.82339e+08	3.27741e+08	1.16081
Q14BI2	GRM2	Grm2	Metabotropic glutamate receptor 2 (mGluR2)	2.31353e+08	2.17242e+08	0.939005	1.59615e+08	1.85234e+08	1.16051
P62918	RL8	Rpl8	60S ribosomal protein L8	4.33454e+08	3.93085e+08	0.906866	3.69414e+08	4.28578e+08	1.16016
P32067	LA	Ssb	Lupus La protein homolog (La autoantigen homolog) (La ribonucleoprotein)	1.61447e+08	1.3956e+08	0.864428	1.15023e+08	1.33376e+08	1.15955
Q3TW96	UAP1L	Uap1l1	UDP-N-acetylhexosamine pyrophosphorylase-like protein 1 (EC 2.7.7.-)	5.2758e+07	5.7437e+07	1.08869	4.92169e+07	5.70397e+07	1.15895
Q9CR98	F136A	Fam136a	Protein FAM136A	1.49152e+08	1.61723e+08	1.08428	1.03395e+08	1.19815e+08	1.1588
Q80ZJ7	SNX32	Snx32	Sorting nexin-32 (Sorting nexin-6B)	1.50965e+07	678411	0.0449383	1.57039e+07	1.81961e+07	1.1587
Q921W0	CHM1A	Chmp1a	Charged multivesicular body protein 1a (Chromatin-modifying protein 1a) (CHMP1a)	4.73884e+07	4.77962e+07	1.00861	7.46648e+07	8.64991e+07	1.1585
Q505F5	LRC47	Lrrc47	Leucine-rich repeat-containing protein 47	1.34162e+08	1.29929e+08	0.968444	1.22014e+08	1.41295e+08	1.15803
P99028	QCR6	Uqcrh	Cytochrome b-c1 complex subunit 6, mitochondrial (Complex III subunit 6) (Complex III subunit VIII) (Cytochrome c1 non-heme 11 kDa protein) (Mitochondrial hinge protein) (Ubiquinol-cytochrome c reductase complex 11 kDa protein)	8.02863e+08	6.64415e+08	0.827557	6.86503e+08	7.94897e+08	1.15789
P56564	EAA1	Slc1a3	Excitatory amino acid transporter 1 (Glial high affinity glutamate transporter) (High-affinity neuronal glutamate transporter) (GluT-1) (Sodium-dependent glutamate/aspartate transporter 1) (GLAST-1) (Solute carrier family 1 member 3)	6.69633e+09	6.19094e+09	0.924527	5.23069e+09	6.05649e+09	1.15788
Q06180	PTN2	Ptpn2	Tyrosine-protein phosphatase non-receptor type 2 (Protein-tyrosine phosphatase PTP-2) (EC 3.1.3.48) (MPTP)	678411	7.85426e+06	11.5774	8.00353e+06	9.25573e+06	1.15646
P62812	GBRA1	Gabra1	Gamma-aminobutyric acid receptor subunit alpha-1 (GABA(A) receptor subunit alpha-1)	2.24253e+08	2.17295e+08	0.968971	2.2275e+08	2.57598e+08	1.15645
Q62418	DBNL	Dbnl	Drebrin-like protein (Actin-binding protein 1) (SH3 domain-containing protein 7)	4.63354e+08	4.64903e+08	1.00334	2.70418e+08	3.12675e+08	1.15626
Q64689	SIA8C	St8sia3	Sia-alpha-2,3-Gal-beta-1,4-GlcNAc-R:alpha 2,8-sialyltransferase (EC 2.4.99.-) (Alpha-2,8-sialyltransferase 8C) (Alpha-2,8-sialyltransferase III) (ST8 alpha-N-acetyl-neuraminide alpha-2,8-sialyltransferase 3) (Sialyltransferase 8C) (SIAT8-C) (Sialyltransferase St8Sia III) (ST8SiaIII)	678411	6.22669e+06	9.17834	1.06745e+07	1.23418e+07	1.1562
Q920R0	ALS2	Als2	Alsin (Amyotrophic lateral sclerosis 2 protein homolog)	16488634	1.99328e+07	1.20888	1.1415e+07	1.31929e+07	1.15575
P49722	PSA2	Psma2	Proteasome subunit alpha type-2 (Macropain subunit C3) (Multicatalytic endopeptidase complex subunit C3) (Proteasome component C3)	5.57953e+08	4.12212e+08	0.738794	4.33807e+08	5.011e+08	1.15512
Q61418	CLCN4	Clcn4	H(+)/Cl(-) exchange transporter 4 (Chloride channel protein 4) (ClC-4) (Chloride transporter ClC-4)	4.44876e+07	2.11869e+07	0.476243	3.80999e+07	4.40028e+07	1.15493
Q9D967	MGDP1	Mdp1	Magnesium-dependent phosphatase 1 (MDP-1) (EC 3.1.3.-) (EC 3.1.3.48)	1.43954e+08	1.49688e+08	1.03983	8.38052e+07	9.67882e+07	1.15492
Q9CQE1	NPS3B	Nipsnap3b	Protein NipSnap homolog 3B (NipSnap3B) (NipSnap-related protein) (Protein NipSnap homolog 3A) (NipSnap3A)	1.02946e+08	1.03869e+08	1.00897	6.28053e+07	7.25174e+07	1.15464
Q64314	CD34	Cd34	Hematopoietic progenitor cell antigen CD34 (CD antigen CD34)	3.10373e+07	2.57619e+07	0.830032	3.52218e+07	4.06676e+07	1.15462
Q9QZF2	GPC1	Gpc1	Glypican-1 [Cleaved into: Secreted glypican-1]	2.70474e+08	2.82748e+08	1.04538	2.18555e+08	2.52228e+08	1.15407
Q8C6A8	BHE22	Bhlhe22	Class E basic helix-loop-helix protein 22 (bHLHe22) (Class B basic helix-loop-helix protein 5) (bHLHb5) (Protein BETA3)				4.40324e+07	5.08147e+07	1.15403
Q5RJG7	ISPD	Crppa	D-ribitol-5-phosphate cytidylyltransferase (EC 2.7.7.40) (2-C-methyl-D-erythritol 4-phosphate cytidylyltransferase-like protein) (Isoprenoid synthase domain-containing protein)	2.7464e+07	3.52961e+07	1.28518	2.03008e+07	2.34199e+07	1.15364
Q9WVC3	CAV2	Cav2	Caveolin-2				2.13745e+07	2.46562e+07	1.15353
Q8CBW3	ABI1	Abi1	Abl interactor 1 (Abelson interactor 1) (Abi-1) (Ablphilin-1) (Eps8 SH3 domain-binding protein) (Eps8-binding protein) (Spectrin SH3 domain-binding protein 1) (e3B1)	5.24525e+08	5.75303e+08	1.09681	3.20849e+08	3.70095e+08	1.15349
P63017	HSP7C	Hspa8	Heat shock cognate 71 kDa protein (EC 3.6.4.10) (Heat shock 70 kDa protein 8)	1.12287e+10	1.207e+10	1.07492	7.19778e+09	8.30212e+09	1.15343
Q9QYR6	MAP1A	Map1a	Microtubule-associated protein 1A (MAP-1A) [Cleaved into: MAP1A heavy chain; MAP1 light chain LC2]	1.93209e+09	1.95171e+09	1.01016	1.7347e+09	2.00044e+09	1.15319
Q7TSC1	PRC2A	Prrc2a	Protein PRRC2A (HLA-B-associated transcript 2) (Proline-rich and coiled-coil-containing protein 2A)	5.92959e+07	1.12407e+07	0.18957	4.28248e+07	4.93685e+07	1.1528
O89112	LANC1	Lancl1	Glutathione S-transferase LANCL1 (EC 2.5.1.18) (40 kDa erythrocyte membrane protein) (p40) (LanC-like protein 1)	4.30532e+08	4.08832e+08	0.949598	3.73477e+08	4.30472e+08	1.15261
Q9JMA1	UBP14	Usp14	Ubiquitin carboxyl-terminal hydrolase 14 (EC 3.4.19.12) (Deubiquitinating enzyme 14) (Ubiquitin thioesterase 14) (Ubiquitin-specific-processing protease 14)	1.65061e+08	1.2323e+08	0.746572	1.9745e+08	2.27545e+08	1.15242
P13595	NCAM1	Ncam1	Neural cell adhesion molecule 1 (N-CAM-1) (NCAM-1) (CD antigen CD56)	6.08099e+08	6.1961e+08	1.01893	5.63021e+08	6.48814e+08	1.15238
Q91XV3	BASP1	Basp1	Brain acid soluble protein 1 (22 kDa neuronal tissue-enriched acidic protein) (Neuronal axonal membrane protein NAP-22)	1.41888e+10	1.23507e+10	0.870456	1.10381e+10	1.27171e+10	1.15211
P17156	HSP72	Hspa2	Heat shock-related 70 kDa protein 2 (Heat shock protein 70.2)	5.14765e+08	5.08238e+08	0.987319	4.18499e+08	4.82001e+08	1.15174
Q9JJF0	NP1L5	Nap1l5	Nucleosome assembly protein 1-like 5	3.18858e+07	3.4096e+07	1.06932	5.85272e+07	6.73797e+07	1.15125
Q91X58	ZFN2B	Zfand2b	AN1-type zinc finger protein 2B (Arsenite-inducible RNA-associated protein-like protein) (AIRAP-like protein)	3.23472e+07	3.81721e+07	1.18008	2.89534e+07	3.33179e+07	1.15074
P13707	GPDA	Gpd1	Glycerol-3-phosphate dehydrogenase [NAD(+)], cytoplasmic (GPD-C) (GPDH-C) (EC 1.1.1.8)	4.34495e+08	4.69642e+08	1.08089	4.62144e+08	5.3172e+08	1.15055
Q8R464	CADM4	Cadm4	Cell adhesion molecule 4 (Immunoglobulin superfamily member 4C) (IgSF4C) (Nectin-like protein 4) (NECL-4) (TSLC1-like protein 2)	4.02014e+08	3.94759e+08	0.981953	3.90904e+08	4.49661e+08	1.15031
Q9Z2C9	MTMR7	Mtmr7	Myotubularin-related protein 7 (Inositol 1,3-bisphosphate phosphatase) (EC 3.1.3.-) (Phosphatidylinositol-3-phosphate phosphatase) (EC 3.1.3.64)	2.35488e+07	2.08375e+07	0.884866	1.42092e+07	1.6342e+07	1.1501
P51855	GSHB	Gss	Glutathione synthetase (GSH synthetase) (GSH-S) (EC 6.3.2.3) (Glutathione synthase)	9.02311e+07	1.02371e+08	1.13454	8.31576e+07	95627128	1.14995
Q8BNY6	NCS1	Ncs1	Neuronal calcium sensor 1 (NCS-1) (Frequenin homolog)	3.91755e+08	3.96356e+08	1.01174	2.83427e+08	3.25925e+08	1.14994
Q9QUH0	GLRX1	Glrx	Glutaredoxin-1 (Thioltransferase-1) (TTase-1)	3.57001e+08	2.89514e+08	0.81096	2.57598e+08	2.96043e+08	1.14925
P42337	PK3CA	Pik3ca	Phosphatidylinositol 4,5-bisphosphate 3-kinase catalytic subunit alpha isoform (PI3-kinase subunit alpha) (PI3K-alpha) (PI3Kalpha) (PtdIns-3-kinase subunit alpha) (EC 2.7.1.137) (EC 2.7.1.153) (Phosphatidylinositol 4,5-bisphosphate 3-kinase 110 kDa catalytic subunit alpha) (PtdIns-3-kinase subunit p110-alpha) (p110alpha) (Phosphoinositide-3-kinase catalytic alpha polypeptide) (Serine/threonine pr…				8.52195e+06	9.79028e+06	1.14883
Q2TBE6	P4K2A	Pi4k2a	Phosphatidylinositol 4-kinase type 2-alpha (EC 2.7.1.67) (Phosphatidylinositol 4-kinase type II-alpha)	6.02016e+07	4.53254e+07	0.752894	3.32067e+07	3.81444e+07	1.1487
P57784	RU2A	Snrpa1	U2 small nuclear ribonucleoprotein A' (U2 snRNP A')	3.43636e+07	2.65955e+07	0.773942	3.69721e+07	4.24651e+07	1.14857
Q8BL74	TF3C2	Gtf3c2	General transcription factor 3C polypeptide 2 (TF3C-beta) (Transcription factor IIIC 110 kDa subunit) (TFIIIC 110 kDa subunit) (TFIIIC110) (Transcription factor IIIC subunit beta)	5.31886e+06	678411	0.127548	5.48587e+06	6.2998e+06	1.14837
Q6X893	CTL1	Slc44a1	Choline transporter-like protein 1 (Solute carrier family 44 member 1) (CD antigen CD92)	2.73354e+08	2.06522e+08	0.755513	2.80171e+08	3.21713e+08	1.14827
Q9Z315	SNUT1	Sart1	U4/U6.U5 tri-snRNP-associated protein 1 (Hypoxia-associated factor) (Squamous cell carcinoma antigen recognized by T-cells 1) (SART-1) (mSART-1)	3.75205e+06	1.0744e+07	2.86352	1.73965e+07	1.99757e+07	1.14826
P35979	RL12	Rpl12	60S ribosomal protein L12	4.81801e+08	5.31093e+08	1.10231	3.26914e+08	3.75367e+08	1.14821
Q7TMQ7	WDR91	Wdr91	WD repeat-containing protein 91	2.04033e+07	2.39309e+07	1.1729	2.31985e+07	2.66339e+07	1.14808
A2AJA9	AJM1	Ajm1	Apical junction component 1 homolog	6.32004e+07	6.54398e+07	1.03543	3.15827e+07	3.62517e+07	1.14783
Q8BTI9	PK3CB	Pik3cb	Phosphatidylinositol 4,5-bisphosphate 3-kinase catalytic subunit beta isoform (PI3-kinase subunit beta) (PI3K-beta) (PI3Kbeta) (PtdIns-3-kinase subunit beta) (EC 2.7.1.153) (Phosphatidylinositol 4,5-bisphosphate 3-kinase 110 kDa catalytic subunit beta) (PtdIns-3-kinase subunit p110-beta) (p110beta)	4.83137e+06	5.72886e+06	1.18576	7.69826e+06	8.83568e+06	1.14775
Q9DB15	RM12	Mrpl12	39S ribosomal protein L12, mitochondrial (L12mt) (MRP-L12)	1.91409e+08	1.80177e+08	0.941318	1.8449e+08	2.11697e+08	1.14747
Q9WTX6	CUL1	Cul1	Cullin-1 (CUL-1)	1.0177e+08	1.19962e+08	1.17875	8.26055e+07	9.47638e+07	1.14719
Q8K1Z0	COQ9	Coq9	Ubiquinone biosynthesis protein COQ9, mitochondrial	2.06594e+08	2.45576e+08	1.18869	1.74628e+08	2.00257e+08	1.14676
Q8K157	GALM	Galm	Galactose mutarotase (EC 5.1.3.3) (Aldose 1-epimerase)	2.06619e+07	678411	0.0328339	2.30082e+07	2.63832e+07	1.14668
Q8C166	CPNE1	Cpne1	Copine-1 (Copine I)	1.16462e+08	1.18506e+08	1.01755	1.02248e+08	1.17222e+08	1.14644
P97765	WBP2	Wbp2	WW domain-binding protein 2 (WBP-2)	1.58892e+08	2.27079e+08	1.42914	3.41169e+08	3.90904e+08	1.14578
Q8VHR5	P66B	Gatad2b	Transcriptional repressor p66-beta (GATA zinc finger domain-containing protein 2B) (p66/p68)	3.94778e+07	3.91722e+07	0.992259	1.92267e+07	2.20227e+07	1.14542
Q99JX3	GORS2	Gorasp2	Golgi reassembly-stacking protein 2 (GRS2) (Golgi reassembly-stacking protein of 55 kDa) (GRASP55)	1.65227e+08	1.55283e+08	0.939815	1.08532e+08	1.24306e+08	1.14535
Q7TMY8	HUWE1	Huwe1	E3 ubiquitin-protein ligase HUWE1 (EC 2.3.2.26) (E3Histone) (HECT, UBA and WWE domain-containing protein 1) (HECT-type E3 ubiquitin transferase HUWE1) (Upstream regulatory element-binding protein 1) (URE-B1) (URE-binding protein 1)	1.04222e+08	9.56393e+07	0.917647	7.56165e+07	8.65656e+07	1.1448
Q62241	RU1C	Snrpc	U1 small nuclear ribonucleoprotein C (U1 snRNP C) (U1-C) (U1C)	1.5541e+08	1.68712e+08	1.08559	1.11469e+08	1.27595e+08	1.14467
Q810U3	NFASC	Nfasc	Neurofascin	2.46904e+08	1.88559e+08	0.763692	2.54024e+08	2.90722e+08	1.14447
Q8QZZ7	TPRKB	Tprkb	EKC/KEOPS complex subunit Tprkb (PRPK-binding protein) (TP53RK-binding protein)	7.39902e+06	1.0567e+07	1.42816	1.33091e+07	1.52316e+07	1.14445
Q9R1V6	ADA22	Adam22	Disintegrin and metalloproteinase domain-containing protein 22 (ADAM 22)	4.3765e+08	4.62426e+08	1.05661	4.27985e+08	4.89694e+08	1.14418
B9EKR1	PTPRZ	Ptprz1	Receptor-type tyrosine-protein phosphatase zeta (R-PTP-zeta) (EC 3.1.3.48)	1.5584e+09	1.44104e+09	0.924693	1.41925e+09	1.62388e+09	1.14418
Q3UHH2	S22AN	Slc22a23	Solute carrier family 22 member 23	3.21234e+07	4.19943e+07	1.30728	3.50299e+07	4.00738e+07	1.14399
Q5GH67	XKR4	Xkr4	XK-related protein 4 [Cleaved into: XK-related protein 4, processed form]	7.95102e+07	6.90348e+07	0.86825	4.53709e+07	5.18882e+07	1.14365
Q7M729	SCN4B	Scn4b	Sodium channel subunit beta-4	2.93971e+07	3.07736e+07	1.04682	3.97198e+07	4.54109e+07	1.14328
Q7TQD2	TPPP	Tppp	Tubulin polymerization-promoting protein (TPPP) (EC 3.6.5.-) (25 kDa brain-specific protein) (TPPP/p25) (p25-alpha)	5.85432e+09	6.15213e+09	1.05087	4.05727e+09	4.63731e+09	1.14296
Q3TDQ1	STT3B	Stt3b	Dolichyl-diphosphooligosaccharide--protein glycosyltransferase subunit STT3B (Oligosaccharyl transferase subunit STT3B) (STT3-B) (EC 2.4.99.18) (B6dom1 antigen) (Source of immunodominant MHC-associated peptides)	5.84358e+07	3.73438e+07	0.639056	4.44641e+07	5.08105e+07	1.14273
Q91VF2	HNMT	Hnmt	Histamine N-methyltransferase (HMT) (EC 2.1.1.8)	3.24926e+07	9.00537e+07	2.77151	1.11966e+08	1.27916e+08	1.14246
P70699	LYAG	Gaa	Lysosomal alpha-glucosidase (EC 3.2.1.20) (Acid maltase)	1.15607e+08	8.38468e+07	0.725273	111087370	1.26898e+08	1.14233
Q8BGC4	PTGR3	Zadh2	Prostaglandin reductase-3 (PTGR-3) (EC 1.3.1.48) (15-oxoprostaglandin 13-reductase) (Zinc-binding alcohol dehydrogenase domain-containing protein 2)	4.05901e+07	4.66394e+07	1.14904	5.758e+07	6.57748e+07	1.14232
Q8CIE6	COPA	Copa	Coatomer subunit alpha (Alpha-coat protein) (Alpha-COP) [Cleaved into: Xenin (Xenopsin-related peptide); Proxenin]	1.65494e+08	1.34236e+08	0.811125	1.30951e+08	1.49584e+08	1.14229
Q80T79	CSMD3	Csmd3	CUB and sushi domain-containing protein 3 (CUB and sushi multiple domains protein 3)	9.78116e+06	7753133	0.79266	1.02668e+07	1.17276e+07	1.14228
Q8BH60	GOPC	Gopc	Golgi-associated PDZ and coiled-coil motif-containing protein (PDZ protein interacting specifically with TC10) (PIST)	1.60671e+07	1.6685e+07	1.03846	5.36756e+06	6.13072e+06	1.14218
Q99JI4	PSMD6	Psmd6	26S proteasome non-ATPase regulatory subunit 6 (26S proteasome regulatory subunit RPN7) (26S proteasome regulatory subunit S10) (p42A)	2.26105e+08	1.90402e+08	0.842097	1.87984e+08	2.14653e+08	1.14187
Q8R2Y2	MUC18	Mcam	Cell surface glycoprotein MUC18 (Gicerin) (Melanoma cell adhesion molecule) (Melanoma-associated antigen MUC18) (CD antigen CD146)	4.47305e+07	5.33834e+07	1.19345	3.64958e+07	4.16674e+07	1.1417
Q9CX00	IST1	Ist1	IST1 homolog	8.99559e+07	1.077e+08	1.19725	8.60099e+07	9.81812e+07	1.14151
Q8BGQ7	SYAC	Aars1	Alanine--tRNA ligase, cytoplasmic (EC 6.1.1.7) (Alanyl-tRNA synthetase) (AlaRS) (Protein sticky) (Sti)	2.95769e+08	3.09147e+08	1.04523	2.50414e+08	2.85823e+08	1.1414
Q61545	EWS	Ewsr1	RNA-binding protein EWS	1.88357e+08	1.84193e+08	0.977895	1.07108e+08	1.22249e+08	1.14137
Q3UTZ3	TPC14	Trappc14	Trafficking protein particle complex subunit 14 (Microtubule-associated protein 11)	2.57082e+07	3.72252e+07	1.44799	2.13238e+07	2.43344e+07	1.14118
O70435	PSA3	Psma3	Proteasome subunit alpha type-3 (Macropain subunit C8) (Multicatalytic endopeptidase complex subunit C8) (Proteasome component C8) (Proteasome subunit K)	3.94532e+08	3.80279e+08	0.963874	3.96545e+08	4.52288e+08	1.14057
Q64337	SQSTM	Sqstm1	Sequestosome-1 (STONE14) (Ubiquitin-binding protein p62)	5.28261e+07	5.29088e+07	1.00157	4.25863e+07	4.85665e+07	1.14043
Q3U7R1	ESYT1	Esyt1	Extended synaptotagmin-1 (E-Syt1) (Membrane-bound C2 domain-containing protein)	2.11503e+07	1.87562e+07	0.886805	2.85138e+07	3.25049e+07	1.13997
Q64442	DHSO	Sord	Sorbitol dehydrogenase (SDH) (SORD) (EC 1.1.1.-) (L-iditol 2-dehydrogenase) (EC 1.1.1.14) (Polyol dehydrogenase) (Xylitol dehydrogenase) (XDH) (EC 1.1.1.9)	7.10724e+07	8.9898e+07	1.26488	7.30869e+07	8.33103e+07	1.13988
Q8BWG8	ARRB1	Arrb1	Beta-arrestin-1 (Arrestin beta-1)	1.59221e+08	1.3928e+08	0.874759	1.06876e+08	1.21707e+08	1.13877
Q2VPQ9	EAF6	Meaf6	Chromatin modification-related protein MEAF6 (MYST/Esa1-associated factor 6) (Esa1-associated factor 6 homolog) (Protein EAF6 homolog)				6.25079e+06	7.11794e+06	1.13873
Q9QZI8	SERC1	Serinc1	Serine incorporator 1 (Axotomy-induced glyco/Golgi protein 2) (Membrane protein TMS-2) (Tumor differentially expressed protein 1-like) (Tumor differentially expressed protein 2)	9.98458e+07	9.98458e+07	1	1.25525e+08	1.42878e+08	1.13824
Q9D7M8	RPB4	Polr2d	DNA-directed RNA polymerase II subunit RPB4 (RNA polymerase II subunit B4) (DNA-directed RNA polymerase II subunit D)	1.20856e+07	678411	0.0561339	1.19703e+07	1.36232e+07	1.13809
Q9QY42	GPR37	Gpr37	Prosaposin receptor GPR37 (G-protein coupled receptor 37)	1.50566e+08	1.07845e+08	0.716264	4.88636e+07	5.56084e+07	1.13803
O08842	GFRA2	Gfra2	GDNF family receptor alpha-2 (GDNF receptor alpha-2) (GDNFR-alpha-2) (GFR-alpha-2) (GDNF receptor beta) (GDNFR-beta) (Neurturin receptor alpha) (NRTNR-alpha) (NTNR-alpha) (TGF-beta-related neurotrophic factor receptor 2)	2.42798e+07	678411	0.0279413	1.06635e+07	1.21323e+07	1.13774
Q61739	ITA6	Itga6	Integrin alpha-6 (CD49 antigen-like family member F) (VLA-6) (CD antigen CD49f) [Cleaved into: Integrin alpha-6 heavy chain; Integrin alpha-6 light chain; Processed integrin alpha-6 (Alpha6p)]	1.00129e+07	1.06933e+07	1.06796	1.78719e+07	2.03253e+07	1.13727
Q8BXZ1	TMX3	Tmx3	Protein disulfide-isomerase TMX3 (EC 5.3.4.1) (Thioredoxin domain-containing protein 10) (Thioredoxin-related transmembrane protein 3)	9.51861e+07	1.01639e+08	1.06779	1.15596e+08	1.31454e+08	1.13719
Q9WVQ1	MAGI2	Magi2	Membrane-associated guanylate kinase, WW and PDZ domain-containing protein 2 (Activin receptor-interacting protein 1) (Acvrip1) (Atrophin-1-interacting protein 1) (AIP-1) (Membrane-associated guanylate kinase inverted 2) (MAGI-2)	6.61836e+07	7.84652e+07	1.18557	4.78258e+07	5.43731e+07	1.1369
Q64727	VINC	Vcl	Vinculin (Metavinculin)	1.9754e+08	1.6231e+08	0.821655	2.09637e+08	2.38297e+08	1.13672
O89001	CBPD	Cpd	Carboxypeptidase D (EC 3.4.17.22) (Metallocarboxypeptidase D) (gp180)	1.95136e+08	3.32029e+07	0.170152	1.77675e+07	2.01894e+07	1.13631
Q8CJG0	AGO2	Ago2	Protein argonaute-2 (Argonaute2) (mAgo2) (EC 3.1.26.n2) (Argonaute RISC catalytic component 2) (Eukaryotic translation initiation factor 2C 2) (eIF-2C 2) (eIF2C 2) (Piwi/argonaute family protein meIF2C2) (Protein slicer)	2.78039e+07	2.24248e+07	0.806537	3.58023e+07	4.06812e+07	1.13627
Q9ES28	ARHG7	Arhgef7	Rho guanine nucleotide exchange factor 7 (Beta-Pix) (PAK-interacting exchange factor beta) (p85SPR)	1.31604e+08	1.47104e+08	1.11778	5.7848e+07	6.57182e+07	1.13605
Q8CJ40	CROCC	Crocc	Rootletin (Ciliary rootlet coiled-coil protein)	1.57817e+08	1.5693e+08	0.994379	1.79901e+08	2.04305e+08	1.13566
Q9Z306	S22A4	Slc22a4	Solute carrier family 22 member 4 (Organic cation/carnitine transporter 1)	5.44022e+06	8.46606e+06	1.5562	7.7556e+06	8.80653e+06	1.13551
Q9JHU2	PALMD	Palmd	Palmdelphin	3.30449e+07	2.96716e+07	0.897918	2.7641e+07	3.1385e+07	1.13545
Q3TRM4	PLPL6	Pnpla6	Patatin-like phospholipase domain-containing protein 6 (Neuropathy target esterase) (EC 3.1.1.5)	678411	1.56106e+07	23.0105	8.89187e+06	1.00949e+07	1.13529
Q8BMF3	MAON	Me3	NADP-dependent malic enzyme, mitochondrial (NADP-ME) (EC 1.1.1.40) (Malic enzyme 3)	3.74377e+08	3.83859e+08	1.02533	1.41445e+08	1.6058e+08	1.13528
Q8BHL5	ELMO2	Elmo2	Engulfment and cell motility protein 2 (Protein ced-12 homolog A)	1.23107e+08	1.13151e+08	0.919126	7.40518e+07	8.40651e+07	1.13522
P43277	H13	H1-3	Histone H1.3 (H1 VAR.4) (H1d)	5.39359e+08	4.8443e+08	0.898159	3.46889e+08	3.93733e+08	1.13504
Q91YL3	UCKL1	Uckl1	Uridine-cytidine kinase-like 1 (EC 2.7.1.48)	1.89007e+07	1.92003e+07	1.01585	1.39401e+07	15820708	1.13491
Q9CZ42	NNRD	Naxd	ATP-dependent (S)-NAD(P)H-hydrate dehydratase (EC 4.2.1.93) (ATP-dependent NAD(P)HX dehydratase) (Carbohydrate kinase domain-containing protein) (NAD(P)HX dehydratase)	2.32979e+08	3.10381e+08	1.33223	1.96763e+08	2.23267e+08	1.1347
O08688	CAN5	Capn5	Calpain-5 (EC 3.4.22.-) (New calpain 3) (nCL-3)	5.19727e+07	5.82485e+07	1.12075	7.37056e+07	8.36332e+07	1.13469
Q9D0W5	PPIL1	Ppil1	Peptidyl-prolyl cis-trans isomerase-like 1 (PPIase) (EC 5.2.1.8) (Rotamase PPIL1)	9.04363e+07	3.58044e+07	0.395907	6.24538e+07	7.08507e+07	1.13445
Q9ER00	STX12	Stx12	Syntaxin-12	3.54e+08	2.31353e+08	0.65354	3.06988e+08	3.48257e+08	1.13443
Q9CS42	PRPS2	Prps2	Ribose-phosphate pyrophosphokinase 2 (EC 2.7.6.1) (Phosphoribosyl pyrophosphate synthase II) (PRS-II)	29750482	7.7889e+07	2.61807	6.44416e+07	7.30869e+07	1.13416
Q69ZS8	KAZRN	Kazn	Kazrin	1.68007e+07	1.00185e+07	0.596313	1.42722e+07	1.61833e+07	1.1339
Q91V64	ISOC1	Isoc1	Isochorismatase domain-containing protein 1	7.07328e+07	8.51664e+07	1.20406	6.69867e+07	7.59415e+07	1.13368
B2RQC6	PYR1	Cad	CAD protein [Includes: Glutamine-dependent carbamoyl-phosphate synthase (EC 6.3.5.5); Aspartate carbamoyltransferase (EC 2.1.3.2); Dihydroorotase (EC 3.5.2.3)]	2.29298e+07	3.18858e+07	1.39058	1.5288e+07	1.73309e+07	1.13362
Q9D154	ILEUA	Serpinb1a	Leukocyte elastase inhibitor A (Serine protease inhibitor EIA) (Serpin B1a)	1.18187e+08	1.5541e+08	1.31495	1.63328e+08	1.85013e+08	1.13277
Q91W92	BORG5	Cdc42ep1	Cdc42 effector protein 1 (Binder of Rho GTPases 5)	2.9765e+07	1.97657e+07	0.664057	3.39652e+07	3.84705e+07	1.13265
Q8CJ27	ASPM	Aspm	Abnormal spindle-like microcephaly-associated protein homolog (Calmodulin-binding protein Sha1) (Calmodulin-binding protein 1) (Spindle and hydroxyurea checkpoint abnormal protein)	678411	2.73635e+07	40.3347	5.6761e+07	6.4278e+07	1.13243
Q80X95	RRAGA	Rraga	Ras-related GTP-binding protein A (Rag A) (RagA) (EC 3.6.5.-)	3.91722e+07	6.18681e+07	1.57939	6.05778e+07	6.85995e+07	1.13242
Q91WC9	DGLB	Daglb	Diacylglycerol lipase-beta (DAGL-beta) (DAGLbeta) (DGL-beta) (EC 3.1.1.116) (PUFA-specific triacylglycerol lipase) (EC 3.1.1.3) (Sn1-specific diacylglycerol lipase beta)	2.17945e+07	2.412e+07	1.1067	1.74194e+07	1.97258e+07	1.1324
Q9ERB0	SNP29	Snap29	Synaptosomal-associated protein 29 (SNAP-29) (Golgi SNARE of 32 kDa) (Gs32) (Soluble 29 kDa NSF attachment protein) (Vesicle-membrane fusion protein SNAP-29)	2.90169e+07	3.20072e+07	1.10305	4.45053e+07	5.03924e+07	1.13228
Q7TPS5	C2CD5	C2cd5	C2 domain-containing protein 5 (138 kDa C2 domain-containing phosphoprotein)	3.67935e+07	2.2403e+07	0.608886	1.97031e+07	22303463	1.13198
Q8R1T1	CHMP7	Chmp7	Charged multivesicular body protein 7 (Chromatin-modifying protein 7)	4.81617e+07	5.22498e+07	1.08488	3.11911e+07	35299701	1.13172
P15105	GLNA	Glul	Glutamine synthetase (GS) (EC 6.3.1.2) (Glutamate--ammonia ligase) (Palmitoyltransferase GLUL) (EC 2.3.1.225)	1.207e+10	1.30848e+10	1.08408	8.24489e+09	9.32848e+09	1.13143
P26450	P85A	Pik3r1	Phosphatidylinositol 3-kinase regulatory subunit alpha (PI3-kinase regulatory subunit alpha) (PI3K regulatory subunit alpha) (PtdIns-3-kinase regulatory subunit alpha) (Phosphatidylinositol 3-kinase 85 kDa regulatory subunit alpha) (PI3-kinase subunit p85-alpha) (PtdIns-3-kinase regulatory subunit p85-alpha)	1.33519e+07	2.34691e+07	1.75774	6.61926e+06	7.48735e+06	1.13114
P62835	RAP1A	Rap1a	Ras-related protein Rap-1A (EC 3.6.5.2) (Ras-related protein Krev-1)	5.25998e+08	2.95073e+08	0.560978	3.57268e+08	4.0384e+08	1.13036
Q9JJY4	DDX20	Ddx20	Probable ATP-dependent RNA helicase DDX20 (EC 3.6.4.13) (Component of gems 3) (DEAD box protein 20) (DEAD box protein DP 103) (Gemin-3) (Regulator of steroidogenic factor 1) (ROSF-1)				6.00326e+06	6.78561e+06	1.13032
Q9WVA4	TAGL2	Tagln2	Transgelin-2 (SM22-beta)	1.07929e+08	1.04501e+08	0.968241	1.04941e+08	1.18604e+08	1.1302
Q9CQS8	SC61B	Sec61b	Protein transport protein Sec61 subunit beta	1.34789e+08	1.33747e+08	0.992265	1.42299e+08	1.60785e+08	1.12991
O70161	PI51C	Pip5k1c	Phosphatidylinositol 4-phosphate 5-kinase type-1 gamma (PIP5K1-gamma) (PtdIns(4)P-5-kinase 1 gamma) (EC 2.7.1.68) (Phosphatidylinositol 4-phosphate 5-kinase type I gamma) (PIP5KIgamma)	5.75303e+08	4.51258e+08	0.784383	3.83995e+08	4.33807e+08	1.12972
Q9CRB2	NHP2	Nhp2	H/ACA ribonucleoprotein complex subunit 2 (Nucleolar protein family A member 2) (snoRNP protein NHP2)	1.68222e+07	1.37488e+07	0.817301	9.33917e+06	1.05496e+07	1.12961
Q01405	SC23A	Sec23a	Protein transport protein Sec23A (SEC23-related protein A)	1.9714e+08	236362946	1.19896	1.83546e+08	2.07271e+08	1.12926
Q8CDN6	TXNL1	Txnl1	Thioredoxin-like protein 1 (32 kDa thioredoxin-related protein)	4.05258e+08	4.12503e+08	1.01788	2.81463e+08	3.17744e+08	1.1289
Q9CZB0	C560	Sdhc	Succinate dehydrogenase cytochrome b560 subunit, mitochondrial (Integral membrane protein CII-3) (QPs-1) (QPs1)	3.04154e+08	2.18425e+08	0.718139	2.08622e+08	2.35511e+08	1.12889
Q9JJU8	SH3L1	Sh3bgrl	SH3 domain-binding glutamic acid-rich-like protein	1.95374e+08	1.68945e+08	0.864723	2.19352e+08	2.47483e+08	1.12825
Q8K2A1	GULP1	Gulp1	PTB domain-containing engulfment adapter protein 1 (Cell death protein 6 homolog) (PTB domain adapter protein CED-6) (Protein GULP)				3.2699e+06	3.68893e+06	1.12814
Q9D6Y9	GLGB	Gbe1	1,4-alpha-glucan-branching enzyme (EC 2.4.1.18) (Brancher enzyme) (Glycogen-branching enzyme)	5.1021e+07	5.53864e+07	1.08556	4.20288e+07	4.74014e+07	1.12783
Q8BYI9	TENR	Tnr	Tenascin-R (TN-R) (Janusin) (Neural recognition molecule J1-160/180) (Restrictin)	2.53013e+09	2.25598e+09	0.891646	2.19279e+09	2.47302e+09	1.1278
Q9WTU6	MK09	Mapk9	Mitogen-activated protein kinase 9 (MAP kinase 9) (MAPK 9) (EC 2.7.11.24) (Stress-activated protein kinase JNK2) (c-Jun N-terminal kinase 2)	3.8972e+07	4.02253e+07	1.03216	3.7865e+07	4.27011e+07	1.12772
O88958	GNPI1	Gnpda1	Glucosamine-6-phosphate isomerase 1 (EC 3.5.99.6) (Glucosamine-6-phosphate deaminase 1) (GNPDA 1) (GlcN6P deaminase 1) (Oscillin)	6.32556e+07	9.1071e+07	1.43973	7.75162e+07	8.74094e+07	1.12763
P06837	NEUM	Gap43	Neuromodulin (Axonal membrane protein GAP-43) (Calmodulin-binding protein P-57) (Growth-associated protein 43)	7.17919e+08	7.72101e+08	1.07547	1.48772e+09	1.67737e+09	1.12748
Q62443	NPTX1	Nptx1	Neuronal pentraxin-1 (NP1) (Neuronal pentraxin I) (NP-I)	3.79756e+08	4.00523e+08	1.05469	3.56668e+08	4.02092e+08	1.12736
Q3U2P1	SC24A	Sec24a	Protein transport protein Sec24A (SEC24-related protein A)	2.39012e+06	678411	0.283839	1.0116e+07	1.14037e+07	1.12729
Q62417	SRBS1	Sorbs1	Sorbin and SH3 domain-containing protein 1 (Ponsin) (SH3 domain protein 5) (SH3P12) (c-Cbl-associated protein) (CAP)	9.93623e+07	6.66786e+07	0.671065	1.02256e+08	1.15257e+08	1.12714
Q6ZPZ3	ZC3H4	Zc3h4	Zinc finger CCCH domain-containing protein 4	1.71609e+07	1.54433e+07	0.899915	1.52316e+07	1.71664e+07	1.12702
Q9DBB8	DHDH	Dhdh	Trans-1,2-dihydrobenzene-1,2-diol dehydrogenase (EC 1.3.1.20) (D-xylose 1-dehydrogenase) (D-xylose-NADP dehydrogenase) (EC 1.1.1.179) (Dimeric dihydrodiol dehydrogenase)	4.647e+07	5.22129e+07	1.12358	4.29114e+07	4.83565e+07	1.12689
Q6PFE7	TEFF1	Tmeff1	Tomoregulin-1 (TR-1) (M7365) (Transmembrane protein with EGF-like and one follistatin-like domain)	2.63547e+07	678411	0.0257416	2.96585e+07	3.34184e+07	1.12677
Q8BXR1	S7A14	Slc7a14	Probable cationic amino acid transporter (Solute carrier family 7 member 14)	3.72111e+08	2.09632e+08	0.56336	1.62942e+08	1.83546e+08	1.12646
Q9Z2D6	MECP2	Mecp2	Methyl-CpG-binding protein 2 (MeCp-2 protein) (MeCp2)	3.2161e+08	3.25077e+08	1.01078	2.75952e+08	3.10847e+08	1.12645
Q8BH95	ECHM	Echs1	Enoyl-CoA hydratase, mitochondrial (EC 4.2.1.17) (Enoyl-CoA hydratase 1) (Short-chain enoyl-CoA hydratase) (SCEH)	6.92635e+08	5.84301e+08	0.843592	4.19616e+08	4.7266e+08	1.12641
O88986	KBL	Gcat	2-amino-3-ketobutyrate coenzyme A ligase, mitochondrial (AKB ligase) (EC 2.3.1.29) (Aminoacetone synthase) (Glycine acetyltransferase)	5.92644e+07	5.33694e+07	0.900531	3.88092e+07	4.37133e+07	1.12636
Q8C6E0	CFA36	Cfap36	Cilia- and flagella-associated protein 36 (Coiled-coil domain-containing protein 104)	8.68986e+07	9.22438e+07	1.06151	4.72024e+07	5.31455e+07	1.12591
P19157	GSTP1	Gstp1	Glutathione S-transferase P 1 (Gst P1) (EC 2.5.1.18) (GST YF-YF) (GST class-pi) (GST-piB) (Preadipocyte growth factor)	3.03137e+09	3.51324e+09	1.15896	2.87301e+09	3.23342e+09	1.12545
P54775	PRS6B	Psmc4	26S proteasome regulatory subunit 6B (26S proteasome AAA-ATPase subunit RPT3) (CIP21) (MB67-interacting protein) (MIP224) (Proteasome 26S subunit ATPase 4) (Tat-binding protein 7) (TBP-7)	2.52402e+08	2.18148e+08	0.864286	2.02694e+08	2.28042e+08	1.12506
Q69ZW3	EHBP1	Ehbp1	EH domain-binding protein 1	2.37999e+07	1.77991e+07	0.747865	1.65335e+07	1.85977e+07	1.12485
Q9Z223	MOC2B	Mocs2	Molybdopterin synthase catalytic subunit (EC 2.8.1.12) (Molybdenum cofactor synthesis protein 2 large subunit) (Molybdenum cofactor synthesis protein 2B) (MOCS2B)	6.17319e+07	3.32861e+07	0.539204	5.76763e+07	6.48739e+07	1.12479
Q9JM96	BORG4	Cdc42ep4	Cdc42 effector protein 4 (Binder of Rho GTPases 4)	6.62396e+07	8.52752e+07	1.28738	5.89639e+07	6.63147e+07	1.12467
Q3V3V9	CARL2	Carmil2	Capping protein, Arp2/3 and myosin-I linker protein 2 (Capping protein regulator and myosin 1 linker 2) (F-actin-uncapping protein RLTPR) (Leucine-rich repeat-containing protein 16C) (RGD, leucine-rich repeat, tropomodulin and proline-rich-containing protein)	1.20945e+08	1.35887e+08	1.12354	1.16295e+08	1.30632e+08	1.12328
P05532	KIT	Kit	Mast/stem cell growth factor receptor Kit (SCFR) (EC 2.7.10.1) (Proto-oncogene c-Kit) (Tyrosine-protein kinase Kit) (CD antigen CD117)	3.81535e+07	4.0611e+07	1.06441	4.90994e+07	5.51485e+07	1.1232
Q9EQH2	ERAP1	Erap1	Endoplasmic reticulum aminopeptidase 1 (EC 3.4.11.-) (ARTS-1) (Adipocyte-derived leucine aminopeptidase) (A-LAP) (Aminopeptidase PILS) (Puromycin-insensitive leucyl-specific aminopeptidase) (PILS-AP) (VEGF-induced aminopeptidase)	1.37736e+07	1.08839e+07	0.790197	1.60355e+07	1.80099e+07	1.12313
Q8C2E7	WASC5	Washc5	WASH complex subunit 5 (WASH complex subunit strumpellin)	2.23133e+07	2.62122e+07	1.17473	2.1064e+07	2.36547e+07	1.12299
O35381	AN32A	Anp32a	Acidic leucine-rich nuclear phosphoprotein 32 family member A (Acidic nuclear phosphoprotein pp32) (Leucine-rich acidic nuclear protein) (LANP) (Potent heat-stable protein phosphatase 2A inhibitor I1PP2A)	9.50835e+08	8.07352e+08	0.849098	8.65507e+08	9.71897e+08	1.12292
Q8BUM6	F163B	Fam163b	Protein FAM163B	8.08682e+07	8.39014e+07	1.03751	4.59371e+07	5.15721e+07	1.12267
Q02819	NUCB1	Nucb1	Nucleobindin-1 (CALNUC)	9.93114e+07	8.91419e+07	0.8976	1.0262e+08	1.15191e+08	1.1225
Q9ERF3	WDR61	Wdr61	WD repeat-containing protein 61 (Meiotic recombination REC14 protein homolog) [Cleaved into: WD repeat-containing protein 61, N-terminally processed]	4.59271e+07	4.7295e+07	1.02978	3.15357e+07	3.53758e+07	1.12177
Q8BLE7	VGLU2	Slc17a6	Vesicular glutamate transporter 2 (VGluT2) (Differentiation-associated BNPI) (Differentiation-associated Na(+)-dependent inorganic phosphate cotransporter) (Solute carrier family 17 member 6)	5.87251e+07	8.12728e+07	1.38395	1.02517e+08	1.14962e+08	1.12139
Q8BHN0	PPM1L	Ppm1l	Protein phosphatase 1L (EC 3.1.3.16) (Protein phosphatase 1-like) (Protein phosphatase 2C isoform epsilon) (PP2C-epsilon)	678411	2.14289e+07	31.5869	1.24563e+07	1.39663e+07	1.12122
Q9QXB9	DRG2	Drg2	Developmentally-regulated GTP-binding protein 2 (DRG-2) (Translation factor GTPase DRG2) (TRAFAC GTPase DRG2) (EC 3.6.5.-)	1.28996e+08	1.30402e+08	1.01089	1.08e+08	1.21046e+08	1.1208
Q9JJZ2	TBA8	Tuba8	Tubulin alpha-8 chain (Alpha-tubulin 8)	1.40232e+08	6.53674e+07	0.466138	8.54384e+07	9.5759e+07	1.1208
P98203	ARVC	Arvcf	Armadillo repeat protein deleted in velo-cardio-facial syndrome homolog	3.87048e+07	3.07534e+07	0.794563	3.53133e+07	3.95782e+07	1.12077
P61358	RL27	Rpl27	60S ribosomal protein L27	3.24023e+08	2.60657e+08	0.804441	3.398e+08	380828671	1.12074
Q924N4	S12A6	Slc12a6	Solute carrier family 12 member 6 (Electroneutral potassium-chloride cotransporter 3) (K-Cl cotransporter 3)	2.99179e+07	2.90439e+07	0.970788	4.09153e+07	4.58551e+07	1.12073
P40124	CAP1	Cap1	Adenylyl cyclase-associated protein 1 (CAP 1)	9.9161e+08	1.02136e+09	1.03	1.23418e+09	1.38282e+09	1.12043
O09131	GSTO1	Gsto1	Glutathione S-transferase omega-1 (GSTO-1) (EC 2.5.1.18) (Glutathione S-transferase omega 1-1) (GSTO 1-1) (Glutathione-dependent dehydroascorbate reductase) (EC 1.8.5.1) (Monomethylarsonic acid reductase) (MMA(V) reductase) (EC 1.20.4.2) (S-(Phenacyl)glutathione reductase) (SPG-R) (p28)	2.56399e+08	2.61457e+08	1.01973	2.28042e+08	2.55468e+08	1.12026
Q80ZW2	THEM6	Them6	Protein THEM6	8.19771e+07	7.35084e+07	0.896694	8.22181e+07	9.20955e+07	1.12014
Q8BLK3	LSAMP	Lsamp	Limbic system-associated membrane protein (LSAMP)	1.65462e+09	1.45106e+09	0.876975	1.50118e+09	1.68133e+09	1.12001
P54227	STMN1	Stmn1	Stathmin (Leukemia-associated gene protein) (Leukemia-associated phosphoprotein p18) (Metablastin) (Oncoprotein 18) (Op18) (Phosphoprotein p19) (pp19) (Prosolin) (Protein Pr22) (pp17)	6.41969e+08	6.57101e+08	1.02357	1.1931e+09	1.33619e+09	1.11993
Q9DCT8	CRIP2	Crip2	Cysteine-rich protein 2 (CRP-2) (Heart LIM protein)	4.31418e+08	2.72371e+08	0.631339	3.49944e+08	3.91901e+08	1.1199
Q6P5D3	DHX57	Dhx57	Putative ATP-dependent RNA helicase DHX57 (EC 3.6.4.13) (DEAH box protein 57)	7.22584e+06	8.93746e+06	1.23687	6.4957e+06	7.27408e+06	1.11983
Q5RJI5	BRSK1	Brsk1	Serine/threonine-protein kinase BRSK1 (EC 2.7.11.1) (EC 2.7.11.26) (Brain-specific serine/threonine-protein kinase 1) (BR serine/threonine-protein kinase 1) (Serine/threonine-protein kinase SAD-B)	1.06605e+08	1.2726e+08	1.19375	6.03334e+07	6.75609e+07	1.11979
Q8VBX6	MPDZ	Mpdz	Multiple PDZ domain protein (Multi-PDZ domain protein 1)				1.91217e+07	2.14122e+07	1.11978
Q8BVL3	SNX17	Snx17	Sorting nexin-17	9.74821e+06	2.5122e+07	2.57708	2.33588e+07	2.61557e+07	1.11974
P47759	NSG2	Nsg2	Neuronal vesicle trafficking-associated protein 2 (Neuron-specific protein family member 2) (Protein 8.5) (Protein p19)				6.13471e+07	6.86852e+07	1.11962
P99024	TBB5	Tubb5	Tubulin beta-5 chain	1.23507e+10	1.21866e+10	0.986711	7.91987e+09	8.86533e+09	1.11938
Q80WJ7	LYRIC	Mtdh	Protein LYRIC (3D3/LYRIC) (Lysine-rich CEACAM1 co-isolated protein) (Metadherin) (Metastasis adhesion protein)	1.08772e+08	8.66612e+07	0.796727	1.03112e+08	1.15381e+08	1.11898
Q8VBY2	KKCC1	Camkk1	Calcium/calmodulin-dependent protein kinase kinase 1 (CaM-KK 1) (CaM-kinase kinase 1) (CaMKK 1) (EC 2.7.11.17) (CaM-kinase IV kinase) (Calcium/calmodulin-dependent protein kinase kinase alpha) (CaM-KK alpha) (CaM-kinase kinase alpha) (CaMKK alpha)	1.17706e+08	1.31479e+08	1.11702	9.50017e+07	1.06297e+08	1.11889
O88543	CSN3	Cops3	COP9 signalosome complex subunit 3 (SGN3) (Signalosome subunit 3) (JAB1-containing signalosome subunit 3)	3.13048e+08	3.38297e+08	1.08066	2.66046e+08	2.9764e+08	1.11876
Q80WB5	NTAQ1	Ntaq1	Protein N-terminal glutamine amidohydrolase (EC 3.5.1.122) (Protein NH2-terminal glutamine deamidase) (N-terminal Gln amidase) (Nt(Q)-amidase) (WDYHV motif-containing protein 1)	1.6295e+07	2.02509e+07	1.24277	7.90869e+06	8.84749e+06	1.1187
Q9D020	5NT3A	Nt5c3a	Cytosolic 5'-nucleotidase 3A (EC 3.1.3.5) (7-methylguanosine phosphate-specific 5'-nucleotidase) (7-methylguanosine nucleotidase) (EC 3.1.3.91) (Cytosolic 5'-nucleotidase 3) (Cytosolic 5'-nucleotidase III) (cN-III) (Lupin) (Pyrimidine 5'-nucleotidase 1) (P5'N-1) (P5N-1) (PN-I)	9.23116e+07	2.47918e+07	0.268567	3.0374e+07	3.39791e+07	1.11869
Q9WUP7	UCHL5	Uchl5	Ubiquitin carboxyl-terminal hydrolase isozyme L5 (UCH-L5) (EC 3.4.19.12) (Ubiquitin C-terminal hydrolase UCH37) (Ubiquitin thioesterase L5)	6.89061e+07	5.77861e+07	0.838621	7.57523e+07	8.47405e+07	1.11865
O35226	PSMD4	Psmd4	26S proteasome non-ATPase regulatory subunit 4 (26S proteasome regulatory subunit RPN10) (26S proteasome regulatory subunit S5A) (Multiubiquitin chain-binding protein)	1.3985e+08	1.44703e+08	1.0347	1.20473e+08	1.34744e+08	1.11846
P0C673	IGS11	Igsf11	Immunoglobulin superfamily member 11 (IgSF11) (Brain and testis-specific immunoglobulin superfamily protein) (Bt-IGSF)	1.48126e+07	2.78039e+07	1.87704	1.49472e+07	1.67131e+07	1.11814
Q8R5C5	ACTY	Actr1b	Beta-centractin (Actin-related protein 1B) (ARP1B)	8.07352e+08	7.74187e+08	0.958922	4.64606e+08	5.19273e+08	1.11766
Q8BH66	ATLA1	Atl1	Atlastin-1 (EC 3.6.5.-) (Spastic paraplegia 3A homolog)	3.43525e+08	3.69255e+08	1.0749	2.87121e+08	3.20849e+08	1.11747
Q99PL5	RRBP1	Rrbp1	Ribosome-binding protein 1 (Ribosome receptor protein) (RRp) (mRRp)	5.88831e+07	9.54838e+07	1.62158	6.01808e+07	6.72317e+07	1.11716
Q9CQK7	RWDD1	Rwdd1	RWD domain-containing protein 1 (DRG family-regulatory protein 2) (IH1)	1.22605e+08	1.27165e+08	1.03719	1.36069e+08	1.51909e+08	1.11641
Q9D4C9	CLVS1	Clvs1	Clavesin-1 (Retinaldehyde-binding protein 1-like 1)	6.98397e+07	1.15607e+08	1.65532	9.07337e+07	101264412	1.11606
Q80UM7	MOGS	Mogs	Mannosyl-oligosaccharide glucosidase (EC 3.2.1.106) (Glucosidase 1) (Glycoprotein-processing glucosidase I)	2.72831e+07	1.76012e+07	0.645131	5.50016e+07	6.13825e+07	1.11601
Q9Z0S1	BPNT1	Bpnt1	3'(2'),5'-bisphosphate nucleotidase 1 (EC 3.1.3.7) (Bisphosphate 3'-nucleotidase 1) (PAP-inositol 1,4-phosphatase) (PIP)	4.22686e+08	4.41019e+08	1.04337	3.93013e+08	4.38419e+08	1.11553
E9PVA8	GCN1	Gcn1	eIF-2-alpha kinase activator GCN1 (GCN1 eIF-2-alpha kinase activator homolog) (GCN1-like protein 1) (General control of amino-acid synthesis 1-like protein 1) (Translational activator GCN1)	4.52204e+07	5.13544e+07	1.13565	5.85136e+07	6.527e+07	1.11547
Q8BYM5	NLGN3	Nlgn3	Neuroligin-3 (Gliotactin homolog)	2.80347e+08	2.82794e+08	1.00873	2.07847e+08	2.31827e+08	1.11537
Q9JIA1	LGI1	Lgi1	Leucine-rich glioma-inactivated protein 1	7.87795e+08	7.11676e+08	0.903378	7.15871e+08	7.9822e+08	1.11503
Q91XD6	VPS36	Vps36	Vacuolar protein-sorting-associated protein 36 (ESCRT-II complex subunit VPS36)	6.41344e+07	1.89465e+08	2.95418	3.91945e+07	4.37031e+07	1.11503
Q9CQ80	VPS25	Vps25	Vacuolar protein-sorting-associated protein 25 (ESCRT-II complex subunit VPS25)	6.36784e+07	7.18596e+07	1.12848	3.41359e+07	3.80545e+07	1.1148
P51174	ACADL	Acadl	Long-chain specific acyl-CoA dehydrogenase, mitochondrial (LCAD) (EC 1.3.8.8)	4.62426e+08	5.24933e+08	1.13517	3.78172e+08	4.21471e+08	1.1145
Q64332	SYN2	Syn2	Synapsin-2 (Synapsin II)	1.20921e+09	1.0731e+10	8.87435	7.07054e+08	7.87926e+08	1.11438
P48036	ANXA5	Anxa5	Annexin A5 (Anchorin CII) (Annexin V) (Annexin-5) (Calphobindin I) (CBP-I) (Endonexin II) (Lipocortin V) (Placental anticoagulant protein 4) (PP4) (Placental anticoagulant protein I) (PAP-I) (Thromboplastin inhibitor) (Vascular anticoagulant-alpha) (VAC-alpha)	9.01256e+08	9.18023e+08	1.0186	7.22044e+08	8.04574e+08	1.1143
Q9R0D8	WDR54	Wdr54	WD repeat-containing protein 54	1.07641e+08	1.07013e+08	0.994158	9.79325e+07	1.09125e+08	1.11429
Q9JI78	NGLY1	Ngly1	Peptide-N(4)-(N-acetyl-beta-glucosaminyl)asparagine amidase (PNGase) (mPNGase) (EC 3.5.1.52) (N-glycanase 1) (Peptide:N-glycanase)	2.49752e+07	3.26842e+07	1.30867	1.70948e+07	1.90441e+07	1.11403
P26039	TLN1	Tln1	Talin-1	7.66405e+07	7.48233e+07	0.976289	8.30674e+07	9.25228e+07	1.11383
O54774	AP3D1	Ap3d1	AP-3 complex subunit delta-1 (AP-3 complex subunit delta) (Adaptor-related protein complex 3 subunit delta-1) (Delta-adaptin) (mBLVR1)	3.69255e+08	3.50665e+08	0.949655	3.08921e+08	3.44072e+08	1.11379
Q61885	MOG	Mog	Myelin-oligodendrocyte glycoprotein	5.2054e+09	5.8952e+09	1.13251	4.71639e+09	5.25225e+09	1.11362
Q9WUB4	DCTN6	Dctn6	Dynactin subunit 6 (Dynactin subunit p27) (Protein WS-3)	1.37426e+08	1.07104e+08	0.779353	7.39099e+07	8.22873e+07	1.11335
P05201	AATC	Got1	Aspartate aminotransferase, cytoplasmic (cAspAT) (EC 2.6.1.1) (EC 2.6.1.3) (Cysteine aminotransferase, cytoplasmic) (Cysteine transaminase, cytoplasmic) (cCAT) (Glutamate oxaloacetate transaminase 1) (Transaminase A)	6.19094e+09	6.05845e+09	0.9786	4.92248e+09	5.47916e+09	1.11309
P50544	ACADV	Acadvl	Very long-chain specific acyl-CoA dehydrogenase, mitochondrial (EC 1.3.8.9) (MVLCAD) (VLCAD)	2.18148e+08	1.58722e+08	0.727589	1.4373e+08	1.5998e+08	1.11306
P97434	MPRIP	Mprip	Myosin phosphatase Rho-interacting protein (Rho-interacting protein 3) (RIP3) (p116Rip)	2.93705e+07	1.63917e+07	0.558101	2.69016e+07	2.99307e+07	1.1126
Q62348	TSN	Tsn	Translin (EC 3.1.-.-) (Component 3 of promoter of RISC) (C3PO) (Testis/brain RNA-binding protein) (TB-RBP)	3.44015e+08	3.41371e+08	0.992314	3.04387e+08	3.38636e+08	1.11252
P50153	GBG4	Gng4	Guanine nucleotide-binding protein G(I)/G(S)/G(O) subunit gamma-4	5.43073e+08	5.88447e+08	1.08355	3.78467e+08	4.20993e+08	1.11236
Q6ZPK7	LST2	Zfyve28	Lateral signaling target protein 2 homolog (Zinc finger FYVE domain-containing protein 28)				6.02701e+06	6.70319e+06	1.11219
Q9JMF3	GBG13	Gng13	Guanine nucleotide-binding protein G(I)/G(S)/G(O) subunit gamma-13	2.53037e+08	1.93798e+08	0.765888	2.03545e+08	2.26323e+08	1.11191
P83870	PHF5A	Phf5a	PHD finger-like domain-containing protein 5A (PHD finger-like domain protein 5A) (Splicing factor 3B-associated 14 kDa protein) (SF3b14b)	3.04227e+07	2.46884e+07	0.811514	3.76035e+07	4.18058e+07	1.11175
Q9Z2W0	DNPEP	Dnpep	Aspartyl aminopeptidase (EC 3.4.11.21)	146903651	1.1985e+08	0.815843	1.32282e+08	1.47037e+08	1.11154
Q80TL4	PHF24	Phf24	PHD finger protein 24	7.00349e+08	6.12676e+08	0.874815	4.25988e+08	4.73439e+08	1.11139
Q9JJY3	NSMA2	Smpd3	Sphingomyelin phosphodiesterase 3 (EC 3.1.4.12) (Neutral sphingomyelinase 2) (nSMase-2) (nSMase2) (Neutral sphingomyelinase II)	1.0694e+08	1.02885e+08	0.962075	1.27792e+08	1.42023e+08	1.11136
Q8BNW9	KBTBB	Kbtbd11	Kelch repeat and BTB domain-containing protein 11	4.23515e+08	4.63354e+08	1.09407	3.48495e+08	3.87077e+08	1.11071
Q8BMJ2	SYLC	Lars1	Leucine--tRNA ligase, cytoplasmic (EC 6.1.1.4) (Leucyl-tRNA synthetase) (LeuRS)	1.707e+08	1.52196e+08	0.891599	7.65174e+07	8.49871e+07	1.11069
P68254	1433T	Ywhaq	14-3-3 protein theta (14-3-3 protein tau)	2.30612e+09	2.81301e+09	1.2198	1.85456e+09	2.05921e+09	1.11035
P97364	SPS2	Sephs2	Selenide, water dikinase 2 (EC 2.7.9.3) (Selenium donor protein 2) (Selenophosphate synthase 2)	1.39124e+08	4.00285e+07	0.287718	1.75304e+07	1.94643e+07	1.11032
Q9D8V0	HM13	Hm13	Minor histocompatibility antigen H13 (EC 3.4.23.-) (Presenilin-like protein 3) (Signal peptide peptidase)	4.48587e+07	1.86281e+07	0.41526	3.68212e+07	4.08804e+07	1.11024
Q99KH8	STK24	Stk24	Serine/threonine-protein kinase 24 (EC 2.7.11.1) (Mammalian STE20-like protein kinase 3) (MST-3) (STE20-like kinase MST3) [Cleaved into: Serine/threonine-protein kinase 24 35 kDa subunit (Mammalian STE20-like protein kinase 3 N-terminal) (MST3/N); Serine/threonine-protein kinase 24 12 kDa subunit (Mammalian STE20-like protein kinase 3 C-terminal) (MST3/C)]	80101973	8.71513e+07	1.088	4.32014e+07	4.7955e+07	1.11003
Q99J99	THTM	Mpst	3-mercaptopyruvate sulfurtransferase (MST) (EC 2.8.1.2)	2.69243e+08	2.52281e+08	0.937003	1.62286e+08	1.80137e+08	1.11
Q3UNH4	GRIN1	Gprin1	G protein-regulated inducer of neurite outgrowth 1 (GRIN1)	4.80803e+08	9.21347e+08	1.91627	4.76856e+08	5.293e+08	1.10998
Q8K411	PREP	Pitrm1	Presequence protease, mitochondrial (EC 3.4.24.-) (Pitrilysin metalloproteinase 1)	4.90454e+07	5.78015e+07	1.17853	3.03401e+07	3.36752e+07	1.10993
Q8K3G9	DP13B	Appl2	DCC-interacting protein 13-beta (Dip13-beta) (Adapter protein containing PH domain, PTB domain and leucine zipper motif 2)	4.3564e+07	2.84574e+07	0.653232	3.51902e+07	3.90557e+07	1.10984
Q3U0V1	FUBP2	Khsrp	Far upstream element-binding protein 2 (FUSE-binding protein 2) (KH type-splicing regulatory protein) (KSRP)	3.27917e+08	3.39539e+08	1.03544	3.26342e+08	3.62092e+08	1.10955
P63137	GBRB2	Gabrb2	Gamma-aminobutyric acid receptor subunit beta-2 (GABA(A) receptor subunit beta-2)	1.54492e+08	1.97177e+08	1.27629	9.83833e+07	1.09136e+08	1.1093
Q6WKZ8	UBR2	Ubr2	E3 ubiquitin-protein ligase UBR2 (EC 2.3.2.27) (N-recognin-2) (RING-type E3 ubiquitin transferase UBR2) (Ubiquitin-protein ligase E3-alpha-2) (Ubiquitin-protein ligase E3-alpha-II)	2.01533e+07	1.36763e+07	0.678611	2.1573e+07	2.39198e+07	1.10879
P15626	GSTM2	Gstm2	Glutathione S-transferase Mu 2 (EC 2.5.1.18) (GST 5-5) (GST class-mu 2) (Glutathione S-transferase pmGT2)	3.32029e+07	1.64082e+07	0.49418	4.17492e+07	4.62817e+07	1.10856
Q91Z38	TTC1	Ttc1	Tetratricopeptide repeat protein 1 (TPR repeat protein 1)	7.57038e+07	3.17975e+07	0.420025	4.96203e+07	5.50016e+07	1.10845
Q9WV54	ASAH1	Asah1	Acid ceramidase (AC) (ACDase) (Acid CDase) (EC 3.5.1.23) (Acylsphingosine deacylase) (N-acylethanolamine hydrolase ASAH1) (EC 3.5.1.-) (N-acylsphingosine amidohydrolase) [Cleaved into: Acid ceramidase subunit alpha; Acid ceramidase subunit beta]	1.76635e+08	1.77828e+08	1.00675	2.17109e+08	2.40618e+08	1.10828
Q8CGA0	PPM1F	Ppm1f	Protein phosphatase 1F (EC 3.1.3.16) (Ca(2+)/calmodulin-dependent protein kinase phosphatase) (CaM-kinase phosphatase) (CaMKPase)	1.27028e+08	1.18059e+08	0.929394	1.29711e+08	1.4373e+08	1.10808
Q9R008	KIME	Mvk	Mevalonate kinase (MK) (EC 2.7.1.36)	2.88821e+07	9.53644e+06	0.330185	3.77965e+07	4.18773e+07	1.10797
P97370	AT1B3	Atp1b3	Sodium/potassium-transporting ATPase subunit beta-3 (Sodium/potassium-dependent ATPase subunit beta-3) (ATPB-3) (CD antigen CD298)	3.49532e+08	6.67659e+08	1.91015	5.11413e+08	5.66522e+08	1.10776
Q8VEL9	REM2	Rem2	GTP-binding protein REM 2 (Rad and Gem-like GTP-binding protein 2)	4.37683e+07	4.76471e+07	1.08862	2.936e+07	3.25177e+07	1.10755
Q9CPS6	HINT3	Hint3	Adenosine 5'-monophosphoramidase HINT3 (EC 3.9.1.-) (HINT-4) (Histidine triad nucleotide-binding protein 3) (HINT-3)	1.13724e+08	1.2015e+08	1.05651	9.14889e+07	1.01324e+08	1.1075
P63168	DYL1	Dynll1	Dynein light chain 1, cytoplasmic (8 kDa dynein light chain) (DLC8) (Dynein light chain LC8-type 1) (Protein inhibitor of neuronal nitric oxide synthase) (PIN) (mPIN)	1.24144e+09	1.23538e+09	0.995119	1.03113e+09	1.14196e+09	1.10749
Q9JKY0	CNOT9	Cnot9	CCR4-NOT transcription complex subunit 9 (Cell differentiation protein RQCD1 homolog) (Rcd-1) (EPO-induced protein FL10)	3.32861e+07	3.32411e+07	0.998646	2.77445e+07	3.07234e+07	1.10737
P99027	RLA2	Rplp2	60S acidic ribosomal protein P2	8.51459e+08	8.13645e+08	0.955589	7.50725e+08	8.31255e+08	1.10727
P62843	RS15	Rps15	40S ribosomal protein S15 (RIG protein)	1.47633e+08	1.18187e+08	0.800544	1.92684e+08	2.13325e+08	1.10713
Q8K2U2	ALKB6	Alkbh6	Alpha-ketoglutarate-dependent dioxygenase alkB homolog 6 (EC 1.14.11.-) (Alkylated DNA repair protein alkB homolog 6)	1.49512e+08	678411	0.00453749	2.59351e+08	2.87121e+08	1.10707
Q8R146	APEH	Apeh	Acylamino-acid-releasing enzyme (AARE) (EC 3.4.19.1) (Acyl-peptide hydrolase) (APH) (Acylaminoacyl-peptidase)	7.26244e+07	7.79475e+07	1.0733	6.9398e+07	7.68223e+07	1.10698
Q9QYI5	DNJB2	Dnajb2	DnaJ homolog subfamily B member 2 (DnaJ homolog subfamily B member 10) (mDj8)	7.14217e+07	8.01985e+07	1.12289	3.25617e+07	3.6043e+07	1.10691
Q8BK30	NDUV3	Ndufv3	NADH dehydrogenase [ubiquinone] flavoprotein 3, mitochondrial (Complex I-9kD) (CI-9kD) (NADH-ubiquinone oxidoreductase 9 kDa subunit)	9.67291e+07	678411	0.00701351	8.11316e+07	8.97513e+07	1.10624
O88545	CSN6	Cops6	COP9 signalosome complex subunit 6 (SGN6) (Signalosome subunit 6) (JAB1-containing signalosome subunit 6)	3.21224e+08	2.8479e+08	0.886578	2.41603e+08	2.67263e+08	1.1062
Q3UFF7	LYPL1	Lyplal1	Lysophospholipase-like protein 1 (EC 3.1.2.-)	3.20468e+07	4.13401e+07	1.28999	1.75928e+07	1.94584e+07	1.10604
Q6PD26	PIGS	Pigs	GPI transamidase component PIG-S (Phosphatidylinositol-glycan biosynthesis class S protein)	4.24267e+07	3.78372e+07	0.891825	2.60792e+07	2.88438e+07	1.10601
P59325	IF5	Eif5	Eukaryotic translation initiation factor 5 (eIF-5)	2.04206e+08	1.98219e+08	0.970681	1.51161e+08	1.67081e+08	1.10532
Q8K4M5	COMD1	Commd1	COMM domain-containing protein 1 (Protein Murr1)	2.34929e+07	3.79052e+07	1.61348	2.47045e+07	2.73054e+07	1.10528
Q60598	SRC8	Cttn	Src substrate cortactin	7.81567e+08	8.7451e+08	1.11892	7.47959e+08	8.26214e+08	1.10462
Q62446	FKBP3	Fkbp3	Peptidyl-prolyl cis-trans isomerase FKBP3 (PPIase FKBP3) (EC 5.2.1.8) (25 kDa FK506-binding protein) (25 kDa FKBP) (FKBP-25) (FK506-binding protein 3) (FKBP-3) (Immunophilin FKBP25) (Rapamycin-selective 25 kDa immunophilin) (Rotamase)	1.99934e+08	2.28488e+08	1.14282	1.81386e+08	2.00361e+08	1.10461
Q3TWN3	CNNM2	Cnnm2	Metal transporter CNNM2 (Ancient conserved domain-containing protein 2) (mACDP2) (Cyclin-M2)	1.81861e+07	1.10648e+07	0.60842	1.61833e+07	1.78719e+07	1.10435
Q5SWU9	ACACA	Acaca	Acetyl-CoA carboxylase 1 (ACC1) (EC 6.4.1.2) (ACC-alpha) (Acetyl-CoA carboxylase 265)	5.09803e+07	5.43145e+07	1.0654	4.3514e+07	4.80354e+07	1.10391
Q8CAQ8	MIC60	Immt	MICOS complex subunit Mic60 (Mitochondrial inner membrane protein) (Mitofilin)	7.91784e+08	4.57622e+08	0.577964	4.45957e+08	4.92281e+08	1.10387
Q8C522	ENDD1	Endod1	Endonuclease domain-containing 1 protein (EC 3.1.30.-)	2.4955e+08	2.81044e+08	1.1262	2.40618e+08	2.65532e+08	1.10354
Q3TIX9	SNUT2	Usp39	U4/U6.U5 tri-snRNP-associated protein 2 (Inactive ubiquitin-specific peptidase 39)	678411	8.34197e+06	12.2963	1.21733e+07	1.34296e+07	1.10321
Q8BHS6	ARMX3	Armcx3	Armadillo repeat-containing X-linked protein 3	2.63108e+07	2.58231e+07	0.981466	1.5581e+07	1.71866e+07	1.10305
Q6GQT5	T151A	Tmem151a	Transmembrane protein 151A	9.39574e+06	9.62965e+06	1.0249	1.13626e+07	1.25303e+07	1.10277
Q8K183	PDXK	Pdxk	Pyridoxal kinase (EC 2.7.1.35) (Pyridoxine kinase)	1.08734e+09	1.10231e+09	1.01377	9.02821e+08	9.95582e+08	1.10275
Q9D428	GOG7B	GOLGA7B	Golgin subfamily A member 7B	5.33076e+07	4.48587e+07	0.841507	4.75618e+07	5.24445e+07	1.10266
Q6P5F9	XPO1	Xpo1	Exportin-1 (Exp1) (Chromosome region maintenance 1 protein homolog)	1.96439e+08	1.93409e+08	0.984576	1.49996e+08	1.65393e+08	1.10265
Q11011	PSA	Npepps	Puromycin-sensitive aminopeptidase (PSA) (EC 3.4.11.14) (Cytosol alanyl aminopeptidase) (AAP-S)	9.65761e+08	9.48706e+08	0.98234	7.11447e+08	7.84204e+08	1.10227
Q9Z266	SNAPN	Snapin	SNARE-associated protein Snapin (Biogenesis of lysosome-related organelles complex 1 subunit 7) (BLOC-1 subunit 7) (Synaptosomal-associated protein 25-binding protein) (SNAP-associated protein)	1.26811e+07	1.05941e+07	0.835419	2.43151e+07	2.67983e+07	1.10213
Q9WUC3	LY6H	Ly6h	Lymphocyte antigen 6H (Ly-6H)	1.13755e+09	1.12248e+09	0.986754	1.04722e+09	1.1536e+09	1.10158
P70398	USP9X	Usp9x	Probable ubiquitin carboxyl-terminal hydrolase FAF-X (EC 3.4.19.12) (Deubiquitinating enzyme FAF-X) (Fat facets homolog) (Fat facets protein-related, X-linked) (Ubiquitin carboxyl-terminal hydrolase FAM) (Ubiquitin thioesterase FAF-X) (Ubiquitin-specific protease 9, X chromosome) (Ubiquitin-specific-processing protease FAF-X)	2.43238e+08	1.18113e+08	0.485585	1.58125e+08	1.74173e+08	1.10149
P18872	GNAO	Gnao1	Guanine nucleotide-binding protein G(o) subunit alpha	1.88343e+09	1.94059e+09	1.03035	1.06592e+09	1.17409e+09	1.10148
Q9JJV5	CCG3	Cacng3	Voltage-dependent calcium channel gamma-3 subunit (Neuronal voltage-gated calcium channel gamma-3 subunit) (Transmembrane AMPAR regulatory protein gamma-3) (TARP gamma-3)	6.2345e+07	4.62956e+07	0.74257	5.08147e+07	5.59656e+07	1.10137
Q8BVI5	STX16	Stx16	Syntaxin-16	5.87881e+07	5.4236e+07	0.922568	4.69715e+07	5.17257e+07	1.10121
Q91W89	MA2C1	Man2c1	Alpha-mannosidase 2C1 (EC 3.2.1.24) (Alpha-D-mannoside mannohydrolase) (Mannosidase alpha class 2C member 1) (Neutral/cytosolic alpha-mannosidase)	5.60262e+07	5.31156e+07	0.948048	4.51686e+07	4.9739e+07	1.10119
P48318	DCE1	Gad1	Glutamate decarboxylase 1 (EC 4.1.1.15) (67 kDa glutamic acid decarboxylase) (GAD-67) (Glutamate decarboxylase 67 kDa isoform)	4.96813e+08	5.12905e+08	1.03239	3.31086e+08	3.64585e+08	1.10118
Q7TSH2	KPBB	Phkb	Phosphorylase b kinase regulatory subunit beta (Phosphorylase kinase subunit beta)	2.57342e+07	1.45624e+07	0.565879	1.95456e+07	2.15212e+07	1.10107
P61264	STX1B	Stx1b	Syntaxin-1B	3.10085e+09	2.71024e+09	0.874029	2.44251e+09	2.689e+09	1.10092
Q8CI94	PYGB	Pygb	Glycogen phosphorylase, brain form (EC 2.4.1.1)	2.42562e+09	2.56831e+09	1.05883	2.16023e+09	2.37807e+09	1.10084
Q9QYE3	BC11A	Bcl11a	B-cell lymphoma/leukemia 11A (BCL-11A) (B-cell CLL/lymphoma 11A) (COUP-TF-interacting protein 1) (Ecotropic viral integration site 9 protein) (EVI-9)	2.4814e+07	3.97467e+07	1.60179	2.03253e+07	2.23732e+07	1.10076
P70704	AT8A1	Atp8a1	Phospholipid-transporting ATPase IA (EC 7.6.2.1) (ATPase class I type 8A member 1) (Chromaffin granule ATPase II) (P4-ATPase flippase complex alpha subunit ATP8A1)	2.61391e+08	2.5277e+08	0.967022	399067021	4.39267e+08	1.10074
P62869	ELOB	Elob	Elongin-B (EloB) (Elongin 18 kDa subunit) (RNA polymerase II transcription factor SIII subunit B) (SIII p18) (Transcription elongation factor B polypeptide 2)	4.08832e+08	4.03044e+08	0.985841	380828671	4.1917e+08	1.10068
Q69ZQ1	MYORG	Myorg	Myogenesis-regulating glycosidase (EC 3.2.1.-) (Nuclear envelope transmembrane protein 37) (Uncharacterized family 31 glucosidase KIAA1161)	678411	4.78185e+06	7.04861	4.72011e+06	5.19524e+06	1.10066
Q9JLB9	NECT3	Nectin3	Nectin-3 (Nectin cell adhesion molecule 3) (Poliovirus receptor-related protein 3) (CD antigen CD113)	2.05966e+07	1.89007e+07	0.917663	10329655	1.13678e+07	1.1005
Q8CAK3	SHFL	Shfl	Shiftless antiviral inhibitor of ribosomal frameshifting protein homolog (SHFL) (Repressor of yield of DENV protein homolog) (RyDEN)	5.03057e+07	3.62558e+07	0.720711	3.38943e+07	3.73004e+07	1.10049
P58252	EF2	Eef2	Elongation factor 2 (EF-2)	1.23331e+09	1.20076e+09	0.973604	9.11109e+08	1.00245e+09	1.10026
O55022	PGRC1	Pgrmc1	Membrane-associated progesterone receptor component 1 (mPR)	5.80417e+08	5.51941e+08	0.950939	8.20702e+08	9.02821e+08	1.10006
O08553	DPYL2	Dpysl2	Dihydropyrimidinase-related protein 2 (DRP-2) (Unc-33-like phosphoprotein 2) (ULIP-2)	2.04147e+10	2.23911e+10	1.09681	1.61209e+10	1.77325e+10	1.09997
Q6P4S6	SIK3	Sik3	Serine/threonine-protein kinase SIK3 (EC 2.7.11.1) (Salt-inducible kinase 3) (SIK-3) (Serine/threonine-protein kinase QSK)	1.1324e+08	1.2588e+08	1.11161	7.88412e+07	8.67128e+07	1.09984
E9Q8I9	FRY	Fry	Protein furry homolog	5.301e+07	4.93382e+07	0.930735	3.87275e+07	4.25863e+07	1.09964
Q8C1Y8	CCZ1	Ccz1	Vacuolar fusion protein CCZ1 homolog	4.36183e+07	4.67098e+07	1.07088	3.72667e+07	4.09787e+07	1.0996
Q9CYG7	TOM34	Tomm34	Mitochondrial import receptor subunit TOM34 (Translocase of outer membrane 34 kDa subunit)	2.03066e+08	2.45736e+08	1.21013	1.38124e+08	1.51881e+08	1.09959
Q8C2Q3	RBM14	Rbm14	RNA-binding protein 14 (RNA-binding motif protein 14)	9.59198e+07	8.32682e+07	0.868103	7.53321e+07	8.28199e+07	1.0994
P46096	SYT1	Syt1	Synaptotagmin-1 (Synaptotagmin I) (SytI) (p65)	2.01958e+08	1.57817e+08	0.781433	9.82467e+07	1.08e+08	1.09927
Q6ZWZ2	UB2R2	Ube2r2	Ubiquitin-conjugating enzyme E2 R2 (EC 2.3.2.23) (E2 ubiquitin-conjugating enzyme R2) (Ubiquitin carrier protein R2) (Ubiquitin-conjugating enzyme E2-CDC34B) (Ubiquitin-protein ligase R2)	2.44325e+07	2.34377e+07	0.959285	3.3129e+07	3.64137e+07	1.09915
P97441	ZNT3	Slc30a3	Zinc transporter 3 (ZnT-3) (Solute carrier family 30 member 3)	3.46971e+08	3.47677e+08	1.00203	2.70046e+08	2.9681e+08	1.09911
Q8BHJ5	TBL1R	Tbl1xr1	F-box-like/WD repeat-containing protein TBL1XR1 (Nuclear receptor corepressor/HDAC3 complex subunit TBLR1) (TBL1-related protein 1) (Transducin beta-like 1X-related protein 1)	1.85056e+07	2.53996e+07	1.37254	2.16487e+07	2.37938e+07	1.09909
Q61923	KCNA6	Kcna6	Potassium voltage-gated channel subfamily A member 6 (MK1.6) (Voltage-gated potassium channel subunit Kv1.6)	2.90822e+07	678411	0.0233274	3.3353e+07	3.66497e+07	1.09884
O08709	PRDX6	Prdx6	Peroxiredoxin-6 (EC 1.11.1.27) (1-Cys peroxiredoxin) (1-Cys PRX) (Acidic calcium-independent phospholipase A2) (aiPLA2) (EC 3.1.1.4) (Antioxidant protein 2) (Glutathione-dependent peroxiredoxin) (Lysophosphatidylcholine acyltransferase 5) (LPC acyltransferase 5) (LPCAT-5) (Lyso-PC acyltransferase 5) (EC 2.3.1.23) (Non-selenium glutathione peroxidase) (NSGPx)	3.64732e+09	5.07204e+09	1.39062	4.28615e+09	4.70946e+09	1.09876
P55012	S12A2	Slc12a2	Solute carrier family 12 member 2 (Basolateral Na-K-Cl symporter) (Bumetanide-sensitive sodium-(potassium)-chloride cotransporter 2)	2.36943e+08	1.97658e+08	0.834198	2.98842e+08	3.28318e+08	1.09864
Q8BG92	CLVS2	Clvs2	Clavesin-2 (Retinaldehyde-binding protein 1-like 2)	5.64409e+07	4.05804e+07	0.718988	5.02821e+07	5.52395e+07	1.09859
Q9CQD1	RAB5A	Rab5a	Ras-related protein Rab-5A (EC 3.6.5.2)	3.50459e+08	3.62043e+08	1.03305	4.04502e+08	4.44364e+08	1.09855
Q03958	PFD6	Pfdn6	Prefoldin subunit 6 (Protein Ke2)	1.93409e+08	1.93916e+08	1.00262	1.72004e+08	1.8888e+08	1.09811
Q9QXV0	PCS1N	Pcsk1n	ProSAAS (IA-4) (Proprotein convertase subtilisin/kexin type 1 inhibitor) (Proprotein convertase 1 inhibitor) (pro-SAAS) [Cleaved into: KEP; Big SAAS (b-SAAS); Little SAAS (l-SAAS); Big PEN-LEN (b-PEN-LEN) (SAAS CT(1-49)); PEN; PEN-20; PEN-19; Little LEN (l-LEN); Big LEN (b-LEN) (SAAS CT(25-40))]	3.94958e+08	3.63822e+08	0.921166	5.80078e+08	6.36965e+08	1.09807
Q80UG2	PLXA4	Plxna4	Plexin-A4	1.74175e+08	1.86909e+08	1.07311	1.61187e+08	1.76979e+08	1.09798
Q80TK0	K1107	Kiaa1107	AP2-interacting clathrin-endocytosis protein (APache)	8.61505e+07	4.59271e+07	0.533104	8.26495e+07	9.07337e+07	1.09781
P47857	PFKAM	Pfkm	ATP-dependent 6-phosphofructokinase, muscle type (ATP-PFK) (PFK-M) (EC 2.7.1.11) (6-phosphofructokinase type A) (Phosphofructo-1-kinase isozyme A) (PFK-A) (Phosphohexokinase)	1.92923e+09	1.96262e+09	1.01731	1.82132e+09	1.99911e+09	1.09762
Q3THG9	AASD1	Aarsd1	Alanyl-tRNA editing protein Aarsd1 (Alanyl-tRNA deacylase alaX) (AlaX) (AlaXp-II) (Alanyl-tRNA synthetase domain-containing protein 1)	3.54929e+07	3.11567e+07	0.87783	3.75497e+07	4.11874e+07	1.09688
Q9DB90	SMG9	Smg9	Protein SMG9	1.76398e+07	678411	0.0384591	1.37189e+07	1.50474e+07	1.09683
O35526	STX1A	Stx1a	Syntaxin-1A (Neuron-specific antigen HPC-1)	8.40974e+08	6.50037e+08	0.772957	7.21201e+08	7.91002e+08	1.09678
Q59J78	NDUF2	Ndufaf2	NADH dehydrogenase [ubiquinone] 1 alpha subcomplex assembly factor 2 (Mimitin) (Myc-induced mitochondrial protein) (MMTN) (NDUFA12-like protein)	8.57085e+07	9.80613e+07	1.14413	4.11874e+07	4.51619e+07	1.0965
P62307	RUXF	Snrpf	Small nuclear ribonucleoprotein F (snRNP-F) (Sm protein F) (Sm-F) (SmF)	5.32557e+07	5.05531e+07	0.949253	5.27031e+07	5.77871e+07	1.09646
Q6P8I4	PCNP	Pcnp	PEST proteolytic signal-containing nuclear protein (PCNP) (PEST-containing nuclear protein)	8.59389e+07	7.57038e+07	0.880902	8.58382e+07	9.41141e+07	1.09641
Q8R2H9	PHOP1	Phospho1	Phosphoethanolamine/phosphocholine phosphatase (EC 3.1.3.75)				2.76599e+07	3.03218e+07	1.09623
O35239	PTN9	Ptpn9	Tyrosine-protein phosphatase non-receptor type 9 (EC 3.1.3.48) (Protein-tyrosine phosphatase MEG2) (PTPase MEG2)	6.83544e+07	7.34599e+07	1.07469	5.0332e+07	5.51746e+07	1.09621
Q99KB8	GLO2	Hagh	Hydroxyacylglutathione hydrolase, mitochondrial (EC 3.1.2.6) (Glyoxalase II) (Glx II)	4.41019e+08	3.81381e+08	0.864773	3.54689e+08	3.88697e+08	1.09588
P63213	GBG2	Gng2	Guanine nucleotide-binding protein G(I)/G(S)/G(O) subunit gamma-2 (G gamma-I)	4.03627e+09	3.95967e+09	0.98102	2.78054e+09	3.04568e+09	1.09536
Q8BG16	S6A15	Slc6a15	Sodium-dependent neutral amino acid transporter B(0)AT2 (Sodium- and chloride-dependent neurotransmitter transporter NTT73) (Solute carrier family 6 member 15) (Transporter v7-3)				2.03476e+07	2.22867e+07	1.0953
P60766	CDC42	Cdc42	Cell division control protein 42 homolog (EC 3.6.5.2) (G25K GTP-binding protein)	2.18631e+09	2.08581e+09	0.954032	1.52035e+09	1.66506e+09	1.09518
Q8VHN8	TIRR	Nudt16l1	Tudor-interacting repair regulator protein (NUDT16-like protein 1) (Protein syndesmos)	1.77433e+07	2.34246e+07	1.3202	2.53505e+07	2.77597e+07	1.09504
Q99JP7	GGT7	Ggt7	Glutathione hydrolase 7 (EC 3.4.19.13) (Gamma-glutamyltransferase 7) (GGT 7) (EC 2.3.2.2) (Gamma-glutamyltransferase-like 3) (Gamma-glutamyltranspeptidase 7) [Cleaved into: Glutathione hydrolase 7 heavy chain; Glutathione hydrolase 7 light chain]	1.68712e+08	1.61994e+08	0.960185	2.2087e+08	2.41837e+08	1.09493
Q9QYH6	MAGD1	Maged1	Melanoma-associated antigen D1 (Dlxin-1) (MAGE-D1 antigen) (Neurotrophin receptor-interacting MAGE homolog)	7.31981e+07	3.69189e+07	0.50437	4.37888e+07	4.79229e+07	1.09441
Q6PHU5	SORT	Sort1	Sortilin (Neurotensin receptor 3) (NTR3) (mNTR3)	1.66904e+08	1.50566e+08	0.902113	1.92219e+08	2.10274e+08	1.09393
Q9D6W8	BORC6	Borcs6	BLOC-1-related complex subunit 6	1.60607e+07	1.55634e+07	0.969037	2.24198e+07	2.45183e+07	1.0936
P62270	RS18	Rps18	40S ribosomal protein S18 (Ke-3) (Ke3)	4.66014e+08	4.2778e+08	0.917954	4.46908e+08	4.88648e+08	1.0934
Q9D8P4	RM17	Mrpl17	39S ribosomal protein L17, mitochondrial (L17mt) (MRP-L17)	2.52945e+07	2.91577e+07	1.15273	3.40725e+07	3.72531e+07	1.09335
Q78PG9	CCD25	Ccdc25	Coiled-coil domain-containing protein 25	1.26136e+07	2.01602e+07	1.59829	1.92871e+07	2.10868e+07	1.09331
Q9WVJ5	CRBB1	Crybb1	Beta-crystallin B1 (Beta-B1 crystallin) [Cleaved into: Beta-crystallin B1B]				2.16011e+07	2.36158e+07	1.09327
Q9WU28	PFD5	Pfdn5	Prefoldin subunit 5 (EIG-1) (Myc modulator 1) (c-Myc-binding protein Mm-1)	1.38386e+08	1.75599e+08	1.26891	1.48292e+08	1.62121e+08	1.09325
Q9JL26	FMNL1	Fmnl1	Formin-like protein 1 (Formin-related protein)	4.98984e+07	5.29446e+07	1.06105	3.67887e+07	4.02158e+07	1.09316
Q6VNS1	NTRK3	Ntrk3	NT-3 growth factor receptor (EC 2.7.10.1) (GP145-TrkC) (Trk-C) (Neurotrophic tyrosine kinase receptor type 3) (TrkC tyrosine kinase)	1.95008e+09	3.59894e+07	0.0184553	4.1844e+07	4.57345e+07	1.09298
Q9ER35	FN3K	Fn3k	Fructosamine-3-kinase (EC 2.7.1.171) (Protein-psicosamine 3-kinase FN3K) (Protein-ribulosamine 3-kinase FN3K) (EC 2.7.1.172)	7.33884e+07	6.97427e+07	0.950323	7.00155e+07	7.65174e+07	1.09286
P97450	ATP5J	Atp5pf	ATP synthase-coupling factor 6, mitochondrial (ATPase subunit F6) (ATP synthase peripheral stalk subunit F6)	1.40157e+09	1.21411e+09	0.866246	1.77899e+09	1.94388e+09	1.09269
Q5SSZ5	TENS3	Tns3	Tensin-3 (Tensin-like SH2 domain-containing protein 1)	678411	4.36183e+07	64.2949	4.96841e+07	5.42851e+07	1.0926
Q8BMG7	RBGPR	Rab3gap2	Rab3 GTPase-activating protein non-catalytic subunit (Rab3 GTPase-activating protein 150 kDa subunit) (Rab3-GAP p150) (Rab3-GAP150) (Rab3-GAP regulatory subunit)	9.27563e+07	1.06185e+08	1.14478	9.64528e+07	1.05378e+08	1.09253
Q8BX94	OSBL2	Osbpl2	Oxysterol-binding protein-related protein 2 (ORP-2) (OSBP-related protein 2)	3.51986e+07	3.94042e+07	1.11948	3.10904e+07	3.39652e+07	1.09246
Q8BZW8	NHLC2	Nhlrc2	NHL repeat-containing protein 2	2.30981e+07	2.76598e+07	1.19749	2.60015e+07	2.84031e+07	1.09237
Q7TQ95	LNP	Lnpk	Endoplasmic reticulum junction formation protein lunapark (ER junction formation factor lunapark) (Protein ulnaless)	9.50918e+07	8.75534e+07	0.920725	6.80181e+07	7.42949e+07	1.09228
Q9QZX7	SRR	Srr	Serine racemase (EC 5.1.1.18) (D-serine ammonia-lyase) (D-serine dehydratase) (EC 4.3.1.18) (L-serine ammonia-lyase) (L-serine dehydratase) (EC 4.3.1.17)	5.19227e+08	5.3785e+08	1.03587	4.14534e+08	4.52774e+08	1.09225
P23492	PNPH	Pnp	Purine nucleoside phosphorylase (PNP) (EC 2.4.2.1) (Inosine phosphorylase) (Inosine-guanosine phosphorylase)	1.95584e+08	1.99934e+08	1.02225	1.75444e+08	1.91591e+08	1.09204
Q8C7R4	UBA6	Uba6	Ubiquitin-like modifier-activating enzyme 6 (Ubiquitin-activating enzyme 6) (EC 6.2.1.45) (Ubiquitin-activating enzyme E1-like protein 2) (E1-L2)	4.51358e+07	4.71167e+07	1.04389	3.28152e+07	3.58232e+07	1.09167
P63087	PP1G	Ppp1cc	Serine/threonine-protein phosphatase PP1-gamma catalytic subunit (PP-1G) (EC 3.1.3.16) (Protein phosphatase 1C catalytic subunit)	3.13681e+08	2.97321e+08	0.947846	2.12776e+08	2.32266e+08	1.0916
P16330	CN37	Cnp	2',3'-cyclic-nucleotide 3'-phosphodiesterase (CNP) (CNPase) (EC 3.1.4.37)	1.78296e+10	2.18792e+10	1.22712	1.32317e+10	1.44434e+10	1.09158
Q504M8	RAB26	Rab26	Ras-related protein Rab-26				9.1932e+06	1.00338e+07	1.09143
Q8C7M3	TRIM9	Trim9	E3 ubiquitin-protein ligase TRIM9 (EC 2.3.2.27) (RING-type E3 ubiquitin transferase TRIM9) (Tripartite motif-containing protein 9)	1.5693e+08	1.56577e+08	0.997753	6.13825e+07	6.69867e+07	1.0913
Q8BHG1	NRDC	Nrdc	Nardilysin (EC 3.4.24.61) (N-arginine dibasic convertase) (NRD convertase) (NRD-C) (Nardilysin convertase)	5.62827e+07	2.18169e+07	0.387631	3.1385e+07	3.42439e+07	1.09109
Q8C163	EXOG	Exog	Nuclease EXOG, mitochondrial (EC 3.1.30.-) (Endonuclease G-like 1) (Endo G-like 1)	678411	2.12858e+08	313.759	9.19187e+07	1.0029e+08	1.09107
P35293	RAB18	Rab18	Ras-related protein Rab-18				2.73092e+08	2.97955e+08	1.09104
Q9QZ73	DCNL1	Dcun1d1	DCN1-like protein 1 (DCNL1) (DCUN1 domain-containing protein 1) (Defective in cullin neddylation protein 1-like protein 1) (Testis-specific protein 3)	2.65318e+07	2.67142e+07	1.00687	40899147	4.46223e+07	1.09103
Q9CR41	HYPK	Hypk	Huntingtin-interacting protein K (Huntingtin yeast partner K)	5.2669e+07	4.52204e+07	0.858577	5.10781e+07	5.57268e+07	1.09101
P56812	PDCD5	Pdcd5	Programmed cell death protein 5 (TF-1 cell apoptosis-related protein 19) (Protein TFAR19)	8.75534e+07	8.48331e+07	0.96893	1.5998e+08	1.74508e+08	1.09081
Q8CIG8	ANM5	Prmt5	Protein arginine N-methyltransferase 5 (Prmt5) (EC 2.1.1.320) (Histone-arginine N-methyltransferase PRMT5) (Jak-binding protein 1) (Shk1 kinase-binding protein 1 homolog) (SKB1 homolog)	8.20563e+07	1.13686e+08	1.38547	1.0677e+08	1.16446e+08	1.09063
Q62351	TFR1	Tfrc	Transferrin receptor protein 1 (TR) (TfR) (TfR1) (Trfr) (CD antigen CD71)	1.21237e+08	1.05888e+08	0.873395	6.2303e+07	67927655	1.09028
Q8BGB7	ENOPH	Enoph1	Enolase-phosphatase E1 (EC 3.1.3.77) (2,3-diketo-5-methylthio-1-phosphopentane phosphatase) (MASA homolog)	2.84903e+08	3.04898e+08	1.07018	2.79464e+08	3.04676e+08	1.09022
P61148	FGF1	Fgf1	Fibroblast growth factor 1 (FGF-1) (Acidic fibroblast growth factor) (aFGF) (Heparin-binding growth factor 1) (HBGF-1)	2.19321e+07	1.12484e+07	0.512873	3.43361e+07	3.74303e+07	1.09012
Q91ZF0	DJC24	Dnajc24	DnaJ homolog subfamily C member 24 (CSL-type zinc finger-containing protein 3) (Diphthamide biosynthesis protein 4) (J domain protein DjC7)				1.96755e+07	2.14478e+07	1.09007
Q8CDG3	VCIP1	Vcpip1	Deubiquitinating protein VCPIP1 (EC 3.4.19.12) (Valosin-containing protein p97/p47 complex-interacting protein 1) (Valosin-containing protein p97/p47 complex-interacting protein p135) (VCP/p47 complex-interacting 135-kDa protein)	8.46985e+07	7.33263e+07	0.865733	6.24809e+07	6.80993e+07	1.08992
Q91YM2	RHG35	Arhgap35	Rho GTPase-activating protein 35 (Glucocorticoid receptor DNA-binding factor 1)	9.34084e+07	8.49835e+07	0.909805	5.03924e+07	5.49231e+07	1.08991
P51432	PLCB3	Plcb3	1-phosphatidylinositol 4,5-bisphosphate phosphodiesterase beta-3 (EC 3.1.4.11) (Phosphoinositide phospholipase C-beta-3) (Phospholipase C-beta-3) (PLC-beta-3)	2.76023e+07	3.67693e+07	1.33211	2.76337e+07	3.01106e+07	1.08964
P26040	EZRI	Ezr	Ezrin (Cytovillin) (Villin-2) (p81)	3.31829e+08	3.03132e+08	0.913518	3.29605e+08	3.59118e+08	1.08954
P23242	CXA1	Gja1	Gap junction alpha-1 protein (Connexin-43) (Cx43) (Gap junction 43 kDa heart protein)	8.49585e+08	8.987e+08	1.05781	9.22041e+08	1.00447e+09	1.0894
P47941	CRKL	Crkl	Crk-like protein	1.17194e+08	1.07791e+08	0.919768	1.05092e+08	1.14487e+08	1.08939
O35681	SYT3	Syt3	Synaptotagmin-3 (Synaptotagmin III) (SytIII)	1.03345e+08	8.68986e+07	0.840862	9.41141e+07	1.02517e+08	1.08929
P97355	SPSY	Sms	Spermine synthase (SPMSY) (EC 2.5.1.22) (Spermidine aminopropyltransferase)	1.9529e+08	2.51571e+08	1.28819	1.74416e+08	1.89949e+08	1.08906
Q9R0G8	NRK	Nrk	Nik-related protein kinase (EC 2.7.11.1) (Nck-interacting kinase-like embryo specific kinase) (NESK) (NIK-like embryo-specific kinase)	678411	7.24251e+06	10.6757	1.49771e+07	1.63011e+07	1.0884
Q8BVA5	LDAH	Ldah	Lipid droplet-associated hydrolase (EC 3.1.1.-) (Lipid droplet-associated serine hydrolase) (mLDAH)	5.41746e+07	1.22605e+08	2.26314	3.69126e+07	4.01746e+07	1.08837
Q921S7	RM37	Mrpl37	39S ribosomal protein L37, mitochondrial (L37mt) (MRP-L37)	2.524e+07	2.71454e+07	1.07549	7.53666e+06	8.20053e+06	1.08809
Q922E4	PCY2	Pcyt2	Ethanolamine-phosphate cytidylyltransferase (EC 2.7.7.14) (CTP:phosphoethanolamine cytidylyltransferase) (Phosphorylethanolamine transferase)	1.57628e+08	1.30928e+08	0.830612	1.14814e+08	1.24857e+08	1.08747
Q8K021	SCAM1	Scamp1	Secretory carrier-associated membrane protein 1 (Secretory carrier membrane protein 1)	1.03306e+09	9.546e+08	0.924049	7.85192e+08	8.53782e+08	1.08736
Q8BNN1	SPA2L	Spata2l	Spermatogenesis-associated protein 2-like protein (SPATA2-like protein)	2.73355e+07	2.54966e+07	0.932729	5.74936e+06	6.25079e+06	1.08721
Q60739	BAG1	Bag1	BAG family molecular chaperone regulator 1 (BAG-1) (Bcl-2-associated athanogene 1)				1.71032e+07	1.85924e+07	1.08707
Q9D1M0	SEC13	Sec13	Protein SEC13 homolog (GATOR complex protein SEC13) (SEC13-like protein 1) (SEC13-related protein)	1.32837e+08	1.58586e+08	1.19384	1.18604e+08	1.2892e+08	1.08699
Q6GV12	KDSR	Kdsr	3-ketodihydrosphingosine reductase (KDS reductase) (EC 1.1.1.102) (3-dehydrosphinganine reductase) (Follicular variant translocation protein 1 homolog) (FVT-1)	1.51197e+07	7.5804e+07	5.01361	4.91753e+07	5.34511e+07	1.08695
Q64433	CH10	Hspe1	10 kDa heat shock protein, mitochondrial (Hsp10) (10 kDa chaperonin) (Chaperonin 10) (CPN10)	3.93968e+09	3.65545e+09	0.927854	3.62214e+09	3.93651e+09	1.08679
Q7TSI3	PP6R1	Ppp6r1	Serine/threonine-protein phosphatase 6 regulatory subunit 1 (SAPS domain family member 1)	3.52961e+07	3.87484e+07	1.09781	2.274e+07	2.47134e+07	1.08678
Q9JL56	GDE1	Gde1	Glycerophosphodiester phosphodiesterase 1 (Glycerophosphoinositol glycerophosphodiesterase GDE1) (EC 3.1.4.44) (Lysophospholipase D GDE1) (EC 3.1.4.-) (Membrane-interacting protein of RGS16)	6.40701e+07	6.81284e+07	1.06334	4.61355e+07	5.01339e+07	1.08667
Q9QXS1	PLEC	Plec	Plectin (PCN) (PLTN) (Plectin-1) (Plectin-6)	4.4479e+08	4.29644e+08	0.965948	5.00135e+08	5.43441e+08	1.08659
P20065	TYB4	Tmsb4x	Thymosin beta-4 (T beta 4) [Cleaved into: Hematopoietic system regulatory peptide (Seraspenide)]	6.64056e+08	1.2825e+09	1.93132	7.40303e+08	8.04366e+08	1.08654
Q9EPR4	S23A2	Slc23a2	Solute carrier family 23 member 2 (Na(+)/L-ascorbic acid transporter 2) (Sodium-dependent vitamin C transporter 2) (SVCT-2) (mSVCT2) (Yolk sac permease-like molecule 2)	8.11791e+07	6.60939e+07	0.814174	5.37108e+07	5.83567e+07	1.0865
Q80VQ0	AL3B1	Aldh3b1	Aldehyde dehydrogenase family 3 member B1 (EC 1.2.1.28) (EC 1.2.1.5) (EC 1.2.1.7) (Aldehyde dehydrogenase 7)	3.81721e+07	4.73884e+07	1.24144	5.32439e+07	5.7848e+07	1.08647
Q6PDI5	ECM29	Ecpas	Proteasome adapter and scaffold protein ECM29 (Proteasome-associated protein ECM29 homolog)	3.77794e+07	4.72033e+07	1.24945	3.43465e+07	3.73128e+07	1.08636
Q8BWR2	PITH1	Pithd1	PITH domain-containing protein 1	1.25349e+08	1.27028e+08	1.01339	1.05378e+08	1.1444e+08	1.086
Q61768	KINH	Kif5b	Kinesin-1 heavy chain (Conventional kinesin heavy chain) (Ubiquitous kinesin heavy chain) (UKHC)	9.70334e+07	1.05706e+08	1.08938	8.18005e+07	8.88208e+07	1.08582
Q78PY7	SND1	Snd1	Staphylococcal nuclease domain-containing protein 1 (EC 3.1.31.1) (100 kDa coactivator) (p100 co-activator)	2.91321e+08	1.99774e+08	0.685752	1.46247e+08	1.58789e+08	1.08576
Q99L04	DHRS1	Dhrs1	Dehydrogenase/reductase SDR family member 1 (EC 1.1.-.-)	1.76606e+08	1.86728e+08	1.05732	1.27595e+08	1.38522e+08	1.08563
P47934	CACP	Crat	Carnitine O-acetyltransferase (Carnitine acetylase) (EC 2.3.1.137) (EC 2.3.1.7) (Carnitine acetyltransferase) (CAT) (CrAT)	1.01639e+08	9.83729e+07	0.967866	7.25174e+07	7.86939e+07	1.08517
A2AP18	PLCH2	Plch2	1-phosphatidylinositol 4,5-bisphosphate phosphodiesterase eta-2 (EC 3.1.4.11) (Phosphoinositide phospholipase C-eta-2) (Phosphoinositide phospholipase C-like 4) (PLC-L4) (Phospholipase C-like protein 4) (Phospholipase C-eta-2) (PLC-eta2)	5.78015e+07	4.90454e+07	0.848514	7.3956e+07	8.0238e+07	1.08494
Q80TY0	FNBP1	Fnbp1	Formin-binding protein 1 (Formin-binding protein 17)	8.33566e+07	8.24125e+07	0.988674	5.93482e+07	6.43844e+07	1.08486
P55258	RAB8A	Rab8a	Ras-related protein Rab-8A (Oncogene c-mel)	101835226	1.05651e+08	1.03747	7.69473e+07	8.34757e+07	1.08484
Q6PEV3	WIPF2	Wipf2	WAS/WASL-interacting protein family member 2 (WASP-interacting protein-related protein) (WIP-related protein)	3.60601e+07	2.90169e+07	0.804682	5.70253e+07	6.18351e+07	1.08435
D3YXJ0	DGKH	Dgkh	Diacylglycerol kinase eta (DAG kinase eta) (EC 2.7.1.107) (Diglyceride kinase eta) (DGK-eta)	9.64783e+07	1.03382e+08	1.07156	6.08746e+07	6.60062e+07	1.0843
O35083	PLCA	Agpat1	1-acyl-sn-glycerol-3-phosphate acyltransferase alpha (EC 2.3.1.51) (1-acylglycerol-3-phosphate O-acyltransferase 1) (1-AGP acyltransferase 1) (1-AGPAT 1) (Lysophosphatidic acid acyltransferase alpha) (LPAAT-alpha)	8.98511e+07	5.7997e+07	0.645479	5.20178e+07	5.64012e+07	1.08427
Q7TPD0	INT3	Ints3	Integrator complex subunit 3 (Int3) (SOSS complex subunit A) (Sensor of single-strand DNA complex subunit A) (SOSS-A) (Sensor of ssDNA subunit A)	1.06172e+07	678411	0.0638972	1.01791e+07	1.10355e+07	1.08413
Q9JMF7	DOPP1	Dolpp1	Dolichyldiphosphatase 1 (EC 3.6.1.43) (Dolichyl pyrophosphate phosphatase 1) (Protein 2-23)				4.51635e+06	4.8944e+06	1.08371
Q6NS82	RETR2	Retreg2	Reticulophagy regulator 2	2.70877e+07	2.30596e+07	0.851294	3.83346e+07	4.15374e+07	1.08355
Q60972	RBBP4	Rbbp4	Histone-binding protein RBBP4 (Chromatin assembly factor 1 subunit C) (CAF-1 subunit C) (Chromatin assembly factor I p48 subunit) (CAF-I 48 kDa subunit) (CAF-I p48) (Nucleosome-remodeling factor subunit RBAP48) (Retinoblastoma-binding protein 4) (RBBP-4) (Retinoblastoma-binding protein p48)	1.40975e+08	2.00777e+08	1.4242	1.22973e+08	1.33194e+08	1.08311
Q641P0	ARP3B	Actr3b	Actin-related protein 3B (ARP3-beta) (Actin-like protein 3B)	6.6327e+08	6.27548e+08	0.946144	3.58744e+08	3.88524e+08	1.08301
Q06335	APLP2	Aplp2	Amyloid beta precursor like protein 2 (Amyloid beta (A4) precursor-like protein 2) (Amyloid protein homolog) (Amyloid-like protein 2) (APLP-2) (CDEI box-binding protein) (CDEBP) (Sperm membrane protein YWK-II)	1.52853e+07	1.57146e+07	1.02809	1.66389e+07	1.80189e+07	1.08294
Q9WVE8	PACN2	Pacsin2	Protein kinase C and casein kinase substrate in neurons protein 2 (Syndapin-2) (Syndapin-II) (SdpII)	2.22177e+08	2.36943e+08	1.06646	1.61065e+08	1.74416e+08	1.08289
Q9DBS1	TMM43	Tmem43	Transmembrane protein 43 (Protein LUMA)	6.54398e+07	8.94386e+07	1.36673	5.96778e+07	6.46194e+07	1.08281
Q61205	PA1B3	Pafah1b3	Platelet-activating factor acetylhydrolase IB subunit alpha1 (EC 3.1.1.47) (PAF acetylhydrolase 29 kDa subunit) (PAF-AH 29 kDa subunit) (PAF-AH subunit gamma) (PAFAH subunit gamma)	7.0463e+07	7.65181e+07	1.08593	9.07935e+07	9.82912e+07	1.08258
Q64444	CAH4	Ca4	Carbonic anhydrase 4 (EC 4.2.1.1) (Carbonate dehydratase IV) (Carbonic anhydrase IV) (CA-IV)	1.3408e+08	1.04222e+08	0.777314	1.17334e+08	1.27014e+08	1.0825
Q99MR3	S12A9	Slc12a9	Solute carrier family 12 member 9 (Cation-chloride cotransporter-interacting protein 1) (Potassium-chloride transporter 9)	2.97936e+07	3.71201e+07	1.24591	2.65141e+07	2.86995e+07	1.08242
O55060	TPMT	Tpmt	Thiopurine S-methyltransferase (EC 2.1.1.67) (Thiopurine methyltransferase)	2.78553e+07	3.01228e+07	1.0814	2.84204e+07	3.07599e+07	1.08232
Q8BGA3	LRRT2	Lrrtm2	Leucine-rich repeat transmembrane neuronal protein 2	1.54433e+07	1.597e+07	1.0341	1.22762e+07	1.32865e+07	1.0823
Q80T41	GABR2	Gabbr2	Gamma-aminobutyric acid type B receptor subunit 2 (GABA-B receptor 2) (GABA-B-R2) (GABA-BR2) (GABABR2) (Gb2) (G-protein coupled receptor 51)	1.6214e+08	1.30756e+08	0.806443	1.14733e+08	1.24153e+08	1.0821
Q60676	PPP5	Ppp5c	Serine/threonine-protein phosphatase 5 (PP5) (EC 3.1.3.16) (Protein phosphatase T) (PPT)	4.11774e+08	4.08453e+08	0.991933	3.0187e+08	3.26597e+08	1.08191
Q6P9R2	OXSR1	Oxsr1	Serine/threonine-protein kinase OSR1 (EC 2.7.11.1) (Oxidative stress-responsive 1 protein)	7.48233e+07	4.36848e+07	0.58384	6.81369e+07	7.37056e+07	1.08173
Q91WS0	CISD1	Cisd1	CDGSH iron-sulfur domain-containing protein 1 (MitoNEET)	2.3292e+09	2.36997e+09	1.0175	2.58522e+09	2.79602e+09	1.08154
P58854	GCP3	Tubgcp3	Gamma-tubulin complex component 3 (GCP-3)	1.74095e+07	1.80989e+07	1.0396	1.35805e+07	1.46878e+07	1.08154
Q6DVA0	LEMD2	Lemd2	LEM domain-containing protein 2 (Nuclear envelope transmembrane protein 25) (NET25)	678411	5.84428e+06	8.61466	7.11794e+06	7.69826e+06	1.08153
Q9R0N7	SYT7	Syt7	Synaptotagmin-7 (Synaptotagmin VII) (SytVII)	1.67099e+08	2.65357e+08	1.58802	1.30078e+08	1.40665e+08	1.08139
Q6R0H7	GNAS1	Gnas	Guanine nucleotide-binding protein G(s) subunit alpha isoforms XLas (Adenylate cyclase-stimulating G alpha protein) (Extra large alphas protein) (XLalphas)	3.75525e+08	4.13502e+08	1.10113	3.93987e+08	4.25988e+08	1.08123
Q9JMC3	DNJA4	Dnaja4	DnaJ homolog subfamily A member 4 (MmDjA4)	1.01922e+08	7.39488e+07	0.72554	1.34744e+08	1.45653e+08	1.08096
Q8R3V5	SHLB2	Sh3glb2	Endophilin-B2 (SH3 domain-containing GRB2-like protein B2)	5.23482e+08	5.65415e+08	1.0801	4.73138e+08	5.11413e+08	1.08089
P14152	MDHC	Mdh1	Malate dehydrogenase, cytoplasmic (EC 1.1.1.37) (Cytosolic malate dehydrogenase)	1.04723e+10	1.02175e+10	0.975668	8.5757e+09	9.26707e+09	1.08062
Q8BUY5	TIDC1	Timmdc1	Complex I assembly factor TIMMDC1, mitochondrial (Translocase of inner mitochondrial membrane domain-containing protein 1) (TIMM domain containing-protein 1)	2.28322e+07	1.75175e+07	0.767225	9.65909e+06	1.04353e+07	1.08036
P46467	VPS4B	Vps4b	Vacuolar protein sorting-associated protein 4B (EC 3.6.4.6) (Suppressor of K(+) transport growth defect 1) (Protein SKD1)	4.37433e+07	60968963	1.39379	3.37856e+07	3.64958e+07	1.08022
Q8C7K6	PCYXL	Pcyox1l	Prenylcysteine oxidase-like (EC 1.8.3.-)	8.43337e+07	8.09669e+07	0.960077	7.41266e+07	8.00676e+07	1.08015
Q9DAR7	DCPS	Dcps	m7GpppX diphosphatase (EC 3.6.1.59) (DCS-1) (Decapping scavenger enzyme) (Hint-related 7meGMP-directed hydrolase) (Histidine triad nucleotide-binding protein 5) (Histidine triad protein member 5) (HINT-5) (Scavenger mRNA-decapping enzyme DcpS)	1.54886e+08	1.58892e+08	1.02587	1.49755e+08	1.61731e+08	1.07997
Q8BHG2	CZIB	Czib	CXXC motif containing zinc binding protein (UPF0587 protein C1orf123 homolog)	1.05651e+08	4.96803e+07	0.470232	7.35582e+07	7.94371e+07	1.07992
Q9WTT4	VATG2	Atp6v1g2	V-type proton ATPase subunit G 2 (V-ATPase subunit G 2) (V-ATPase 13 kDa subunit 2) (Vacuolar proton pump subunit G 2)	2.79196e+09	2.48619e+09	0.890481	1.83431e+09	1.9809e+09	1.07992
Q9CW07	PP13G	Ppp1r3g	Protein phosphatase 1 regulatory subunit 3G	678411	6.20855e+06	9.15161	1.87608e+07	2.02574e+07	1.07977
Q8C729	F126B	Fam126b	Protein FAM126B	1.46113e+08	1.20456e+08	0.824405	1.01566e+08	1.09664e+08	1.07973
Q8BXN9	TM87A	Tmem87a	Transmembrane protein 87A	2.14921e+07	678411	0.0315656	6.07507e+06	6.55916e+06	1.07969
O70274	TP4A2	Ptp4a2	Protein tyrosine phosphatase type IVA 2 (EC 3.1.3.48) (Protein-tyrosine phosphatase 4a2) (Protein-tyrosine phosphatase of regenerating liver 2) (PRL-2)	2.42229e+07	5.4209e+07	2.23792	3.36892e+07	3.63737e+07	1.07968
Q9CQ88	TSN31	Tspan31	Tetraspanin-31 (Tspan-31) (Sarcoma-amplified sequence homolog)	1.82342e+07	1.413e+07	0.774921	1.70003e+07	1.83535e+07	1.0796
P10711	TCEA1	Tcea1	Transcription elongation factor A protein 1 (Transcription elongation factor S-II protein 1) (Transcription elongation factor TFIIS.o)	8.62437e+07	8.86663e+07	1.02809	6.97317e+07	7.52518e+07	1.07916
Q8BL86	MBLC2	Mblac2	Acyl-coenzyme A thioesterase MBLAC2 (Acyl-CoA thioesterase MBLAC2) (EC 3.1.2.2) (Beta-lactamase MBLAC2) (EC 3.5.2.6) (Metallo-beta-lactamase domain-containing protein 2) (Palmitoyl-coenzyme A thioesterase MBLAC2)	6.99317e+07	7.51874e+07	1.07516	5.57268e+07	6.01325e+07	1.07906
Q8BLQ9	CADM2	Cadm2	Cell adhesion molecule 2 (Immunoglobulin superfamily member 4D) (IgSF4D) (Nectin-like protein 3) (NECL-3) (Synaptic cell adhesion molecule 2) (SynCAM 2)	1.96262e+09	2.12705e+09	1.08378	1.59308e+09	1.7188e+09	1.07891
Q8BW41	PMGT2	Pomgnt2	Protein O-linked-mannose beta-1,4-N-acetylglucosaminyltransferase 2 (POMGnT2) (EC 2.4.1.312) (Extracellular O-linked N-acetylglucosamine transferase-like) (Glycosyltransferase-like domain-containing protein 2)	2.4453e+07	1.65026e+07	0.674872	2.29674e+07	2.47697e+07	1.07847
Q3UH93	PLXD1	Plxnd1	Plexin-D1	1.8891e+07	1.41712e+07	0.750159	1.48358e+07	1.59836e+07	1.07737
B2RSH2	GNAI1	Gnai1	Guanine nucleotide-binding protein G(i) subunit alpha-1 (Adenylate cyclase-inhibiting G alpha protein)	8.42837e+08	7.61425e+08	0.903408	7.3621e+08	7.93113e+08	1.07729
Q64511	TOP2B	Top2b	DNA topoisomerase 2-beta (EC 5.6.2.2) (DNA topoisomerase II, beta isozyme)	1.69061e+09	1.25603e+09	0.742945	1.96699e+09	2.11877e+09	1.07717
P24668	MPRD	M6pr	Cation-dependent mannose-6-phosphate receptor (CD Man-6-P receptor) (CD-MPR) (46 kDa mannose 6-phosphate receptor) (MPR 46)	9.28236e+07	1.91145e+08	2.05923	1.71431e+08	1.84656e+08	1.07714
Q8QZR5	ALAT1	Gpt	Alanine aminotransferase 1 (ALT1) (EC 2.6.1.2) (Glutamate pyruvate transaminase 1) (GPT 1) (Glutamic--alanine transaminase 1) (Glutamic--pyruvic transaminase 1)	4.688e+07	5.54455e+07	1.18271	5.97588e+07	6.43674e+07	1.07712
Q99P58	RB27B	Rab27b	Ras-related protein Rab-27B (EC 3.6.5.2)	8.79045e+07	9.82607e+07	1.11781	7.32487e+07	7.88749e+07	1.07681
P80315	TCPD	Cct4	T-complex protein 1 subunit delta (TCP-1-delta) (A45) (CCT-delta)	8.18152e+08	8.51459e+08	1.04071	6.90052e+08	7.43007e+08	1.07674
O35678	MGLL	Mgll	Monoglyceride lipase (MGL) (EC 3.1.1.23) (Monoacylglycerol lipase) (MAGL)	3.86642e+08	3.62147e+08	0.936646	3.18241e+08	3.4264e+08	1.07667
Q0VGY8	TANC1	Tanc1	Protein TANC1 (Tetratricopeptide repeat, ankyrin repeat and coiled-coil domain-containing protein 1)	4.83538e+07	3.30449e+07	0.683398	2.01305e+07	2.1673e+07	1.07663
Q99JB2	STML2	Stoml2	Stomatin-like protein 2, mitochondrial (SLP-2) (mslp2)	1.24607e+08	1.13879e+08	0.913909	4.57042e+07	4.92012e+07	1.07651
Q9D4H8	CUL2	Cul2	Cullin-2 (CUL-2)	1.46866e+08	1.49384e+08	1.01715	8.78826e+07	9.46008e+07	1.07644
Q8BPM0	DAAM1	Daam1	Disheveled-associated activator of morphogenesis 1	2.8175e+07	2.09002e+07	0.741801	2.19621e+07	2.36356e+07	1.0762
Q9DB70	FUND1	Fundc1	FUN14 domain-containing protein 1	5.43145e+07	8.5785e+07	1.57941	4.38652e+07	4.72024e+07	1.07608
D3YWQ0	DGKI	Dgki	Diacylglycerol kinase iota (DAG kinase iota) (EC 2.7.1.107)	7.76364e+07	7.56578e+07	0.974515	4.46812e+07	4.80758e+07	1.07597
G5E829	AT2B1	Atp2b1	Plasma membrane calcium-transporting ATPase 1 (EC 7.2.2.10) (Plasma membrane calcium ATPase isoform 1) (PMCA1) (Plasma membrane calcium pump isoform 1)	2.2684e+09	2.15775e+09	0.951222	1.43819e+09	1.5473e+09	1.07586
Q68ED2	GRM7	Grm7	Metabotropic glutamate receptor 7 (mGluR7)	8.39014e+07	6.18214e+07	0.736834	5.39939e+07	5.80841e+07	1.07575
Q8BPU7	ELMO1	Elmo1	Engulfment and cell motility protein 1 (Protein ced-12 homolog)	2.18517e+07	42725093	1.95523	1.86994e+07	2.01105e+07	1.07546
P10518	HEM2	Alad	Delta-aminolevulinic acid dehydratase (ALADH) (EC 4.2.1.24) (Porphobilinogen synthase)	1.14683e+08	1.33844e+08	1.16708	1.27014e+08	1.36576e+08	1.07528
Q9CPT4	MYDGF	Mydgf	Myeloid-derived growth factor (MYDGF)	9.88393e+07	7.07465e+07	0.715773	4.0951e+07	4.40324e+07	1.07525
Q8BGD9	IF4B	Eif4b	Eukaryotic translation initiation factor 4B (eIF-4B)	2.54603e+08	2.14699e+08	0.843272	3.07735e+08	3.30823e+08	1.07502
Q8VI75	IPO4	Ipo4	Importin-4 (Imp4) (Importin-4a) (Imp4a) (Ran-binding protein 4) (RanBP4)	39209797	4.18525e+07	1.0674	3.56133e+07	3.8282e+07	1.07493
Q9CQ10	CHMP3	Chmp3	Charged multivesicular body protein 3 (Chromatin-modifying protein 3) (Vacuolar protein sorting-associated protein 24)	1.6231e+08	1.66904e+08	1.02831	9.2285e+07	9.91579e+07	1.07447
P46737	BRCC3	Brcc3	Lys-63-specific deubiquitinase BRCC36 (EC 3.4.19.-) (BRCA1-A complex subunit BRCC36) (BRCA1/BRCA2-containing complex subunit 3) (BRCA1/BRCA2-containing complex subunit 36) (BRISC complex subunit BRCC36)	2.72539e+07	2.62464e+07	0.963033	2.02574e+07	2.17653e+07	1.07444
Q8K0P3	MEAK7	Meak7	MTOR-associated protein MEAK7 (MEAK7) (TBC/LysM-associated domain-containing protein 1) (TLD domain-containing protein 1)	1.05908e+07	1.24701e+07	1.17745	1.43347e+07	1.53969e+07	1.07409
Q6NVE8	WDR44	Wdr44	WD repeat-containing protein 44 (Rabphilin-11)	59733331	5.53256e+07	0.92621	5.55043e+07	5.96157e+07	1.07407
P28571	SC6A9	Slc6a9	Sodium- and chloride-dependent glycine transporter 1 (GlyT-1) (GlyT1) (Solute carrier family 6 member 9)	5.34601e+07	5.30618e+07	0.992549	9.23626e+07	9.91936e+07	1.07396
P97855	G3BP1	G3bp1	Ras GTPase-activating protein-binding protein 1 (G3BP-1) (EC 3.6.4.12) (EC 3.6.4.13) (ATP-dependent DNA helicase VIII) (GAP SH3 domain-binding protein 1) (HDH-VIII)	6.06115e+07	5.56039e+07	0.917382	1.10664e+08	1.18828e+08	1.07378
Q9CRD0	OCAD1	Ociad1	OCIA domain-containing protein 1	1.44331e+08	1.40363e+08	0.972507	9.52792e+07	1.02256e+08	1.07323
Q8BTH8	KC1G1	Csnk1g1	Casein kinase I isoform gamma-1 (CKI-gamma 1) (EC 2.7.11.1)	2.40241e+06	2.96045e+07	12.3229	3.07687e+07	3.30157e+07	1.07303
P24527	LKHA4	Lta4h	Leukotriene A-4 hydrolase (LTA-4 hydrolase) (EC 3.3.2.6) (Leukotriene A(4) hydrolase) (Tripeptide aminopeptidase LTA4H) (EC 3.4.11.4)	2.82248e+08	3.00892e+08	1.06605	2.75081e+08	2.95161e+08	1.073
Q3TYS2	CYBC1	Cybc1	Cytochrome b-245 chaperone 1 (Essential for reactive oxygen species protein) (Eros)	2.23757e+07	1.93423e+07	0.864432	2.16198e+07	2.31841e+07	1.07235
Q3U1J4	DDB1	Ddb1	DNA damage-binding protein 1 (DDB p127 subunit) (Damage-specific DNA-binding protein 1) (UV-damaged DNA-binding factor)	1.97078e+08	2.13484e+08	1.08325	2.51673e+08	2.69821e+08	1.07211
Q62084	PP14B	Ppp1r14b	Protein phosphatase 1 regulatory subunit 14B (Phosphatase holoenzyme inhibitor 1) (PHI-1) (Phospholipase C-beta-3 neighbouring gene protein)				2.38896e+07	2.56116e+07	1.07208
Q91YR1	TWF1	Twf1	Twinfilin-1 (Protein A6)	3.20517e+08	3.29116e+08	1.02683	2.97104e+08	3.18459e+08	1.07187
Q9CQM9	GLRX3	Glrx3	Glutaredoxin-3 (PKC-interacting cousin of thioredoxin) (PICOT) (PKC-theta-interacting protein) (PKCq-interacting protein) (Thioredoxin-like protein 2)	2.89184e+08	2.59589e+08	0.89766	1.97749e+08	2.11959e+08	1.07185
Q9DCL8	IPP2	Ppp1r2	Protein phosphatase inhibitor 2 (IPP-2)	1.06185e+08	4.25514e+07	0.400728	1.36363e+08	1.46108e+08	1.07146
Q80W04	TMCC2	Tmcc2	Transmembrane and coiled-coil domains protein 2	2.46162e+07	2.54202e+07	1.03266	2.44409e+07	2.61864e+07	1.07142
Q9JHW2	NIT2	Nit2	Omega-amidase NIT2 (EC 3.5.1.3) (Nitrilase homolog 2)	5.21415e+07	7.11443e+07	1.36445	6.86852e+07	7.35751e+07	1.07119
P17751	TPIS	Tpi1	Triosephosphate isomerase (TIM) (EC 5.3.1.1) (Methylglyoxal synthase) (EC 4.2.3.3) (Triose-phosphate isomerase)	1.21866e+10	1.38396e+10	1.13564	8.00731e+09	8.5757e+09	1.07098
Q9D1A2	CNDP2	Cndp2	Cytosolic non-specific dipeptidase (EC 3.4.13.18) (CNDP dipeptidase 2) (Glutamate carboxypeptidase-like protein 1) (Threonyl dipeptidase)	5.65415e+08	6.23572e+08	1.10286	3.87077e+08	4.14534e+08	1.07094
Q8R1F1	NIBA2	Niban2	Protein Niban 2 (Meg-3) (Niban-like protein 1) (Protein FAM129B)	1.11891e+07	1.63575e+07	1.46191	1.80099e+07	1.92871e+07	1.07092
Q99KP6	PRP19	Prpf19	Pre-mRNA-processing factor 19 (EC 2.3.2.27) (Nuclear matrix protein 200) (PRP19/PSO4 homolog) (RING-type E3 ubiquitin transferase PRP19) (Senescence evasion factor)	2.25769e+08	1.87131e+08	0.828861	1.59836e+08	1.71146e+08	1.07076
Q9JIS5	SV2A	Sv2a	Synaptic vesicle glycoprotein 2A (Synaptic vesicle protein 2) (Synaptic vesicle protein 2A) (Calcium regulator SV2A)	2.34941e+09	2.32422e+09	0.98928	1.66506e+09	1.78248e+09	1.07052
Q9DB27	MCTS1	Mcts1	Malignant T-cell-amplified sequence 1 (MCT-1) (Multiple copies T-cell malignancies 1)	1.99774e+08	2.04206e+08	1.02219	1.93499e+08	2.07134e+08	1.07047
Q9D1Q4	DPM3	Dpm3	Dolichol-phosphate mannosyltransferase subunit 3 (Dolichol-phosphate mannose synthase subunit 3) (DPM synthase subunit 3) (Dolichyl-phosphate beta-D-mannosyltransferase subunit 3) (Mannose-P-dolichol synthase subunit 3) (MPD synthase subunit 3)	3.54457e+07	3.12356e+07	0.881224	4.92337e+07	5.26907e+07	1.07022
P27641	XRCC5	Xrcc5	X-ray repair cross-complementing protein 5 (EC 3.6.4.-) (ATP-dependent DNA helicase 2 subunit 2) (ATP-dependent DNA helicase II 80 kDa subunit) (CTC box-binding factor 85 kDa subunit) (CTC85) (CTCBF) (DNA repair protein XRCC5) (Ku autoantigen protein p86 homolog) (Ku80) (Nuclear factor IV)	4.60634e+06	678411	0.147278	8.59202e+06	9.1932e+06	1.06997
Q60854	SPB6	Serpinb6	Serpin B6 (Placental thrombin inhibitor) (Proteinase inhibitor 6) (PI-6)	2.23471e+08	1.76606e+08	0.790286	2.30896e+08	2.47048e+08	1.06996
Q9CZC8	SCRN1	Scrn1	Secernin-1	6.37411e+08	6.61984e+08	1.03855	4.77854e+08	5.1122e+08	1.06982
Q4KML4	ABRAL	Abracl	Costars family protein ABRACL (ABRA C-terminal-like protein)	1.86284e+08	2.0069e+08	1.07733	2.11323e+08	2.26057e+08	1.06972
Q9ES74	NEK7	Nek7	Serine/threonine-protein kinase Nek7 (EC 2.7.11.1) (Never in mitosis A-related kinase 7) (NimA-related protein kinase 7)	1.29781e+07	1.60533e+07	1.23696	1.5137e+07	1.61909e+07	1.06963
Q04447	KCRB	Ckb	Creatine kinase B-type (EC 2.7.3.2) (B-CK) (Creatine kinase B chain) (Creatine phosphokinase B-type) (CPK-B)	2.18792e+10	2.5048e+10	1.14483	1.77325e+10	1.89666e+10	1.0696
Q93092	TALDO	Taldo1	Transaldolase (EC 2.2.1.2)	8.83993e+08	8.83993e+08	1	8.51999e+08	9.11109e+08	1.06938
P60122	RUVB1	Ruvbl1	RuvB-like 1 (EC 3.6.4.12) (49 kDa TATA box-binding protein-interacting protein) (49 kDa TBP-interacting protein) (DNA helicase p50) (Pontin 52) (TIP49a)	1.79648e+08	1.28996e+08	0.718049	1.32736e+08	1.4191e+08	1.06911
Q9R0K7	AT2B2	Atp2b2	Plasma membrane calcium-transporting ATPase 2 (PMCA2) (EC 7.2.2.10) (Plasma membrane calcium ATPase isoform 2) (Plasma membrane calcium pump isoform 2)	1.12248e+09	1.33032e+09	1.18516	9.49441e+08	1.01493e+09	1.06898
Q9DAS9	GBG12	Gng12	Guanine nucleotide-binding protein G(I)/G(S)/G(O) subunit gamma-12	4.73255e+08	1.78471e+09	3.77115	1.33619e+09	1.42821e+09	1.06887
Q9QYM9	TEFF2	Tmeff2	Tomoregulin-2 (TR-2) (Transmembrane protein with EGF-like and two follistatin-like domains)	3.80553e+07	4.93624e+07	1.29712	4.25253e+07	4.54509e+07	1.0688
Q60902	EP15R	Eps15l1	Epidermal growth factor receptor substrate 15-like 1 (Epidermal growth factor receptor pathway substrate 15-related sequence) (Eps15-rs) (Eps15-related protein) (Eps15R)	1.63597e+08	1.59494e+08	0.97492	1.6784e+08	1.79384e+08	1.06878
P17047	LAMP2	Lamp2	Lysosome-associated membrane glycoprotein 2 (LAMP-2) (Lysosome-associated membrane protein 2) (CD107 antigen-like family member B) (Lysosomal membrane glycoprotein type B) (LGP-B) (CD antigen CD107b)	9.63885e+07	9.37173e+07	0.972287	1.23776e+08	1.32282e+08	1.06872
Q8C8T7	ELFN1	Elfn1	Protein ELFN1 (Extracellular leucine-rich repeat and fibronectin type-III domain-containing protein 1) (Protein phosphatase 1 regulatory subunit 28)	1.22759e+07	1.40571e+07	1.1451	7.93887e+06	8.48321e+06	1.06857
P97461	RS5	Rps5	40S ribosomal protein S5 [Cleaved into: 40S ribosomal protein S5, N-terminally processed]	3.10748e+08	2.86786e+08	0.92289	2.58245e+08	2.75952e+08	1.06857
Q99P72	RTN4	Rtn4	Reticulon-4 (Neurite outgrowth inhibitor) (Nogo protein)	1.54479e+09	1911320026	1.23727	1.51168e+09	1.61533e+09	1.06856
Q80Y14	GLRX5	Glrx5	Glutaredoxin-related protein 5, mitochondrial (Monothiol glutaredoxin-5)	1.3131e+08	7.10833e+07	0.541338	5.66934e+07	6.05778e+07	1.06851
P21126	UBL4A	Ubl4a	Ubiquitin-like protein 4A (Ubiquitin-like protein GDX)	6.10478e+07	7.36256e+07	1.20603	8.0351e+07	8.58382e+07	1.06829
P31648	SC6A1	Slc6a1	Sodium- and chloride-dependent GABA transporter 1 (GAT-1) (Solute carrier family 6 member 1)	1.57057e+09	1.48247e+09	0.943905	1.2053e+09	1.28746e+09	1.06817
O08539	BIN1	Bin1	Myc box-dependent-interacting protein 1 (Amphiphysin II) (Amphiphysin-like protein) (Bridging integrator 1) (SH3 domain-containing protein 9)	1.82444e+09	2.02044e+09	1.10743	1.38282e+09	1.47677e+09	1.06794
Q6PE13	PRRT3	Prrt3	Proline-rich transmembrane protein 3	1.25201e+08	8.39842e+07	0.670794	1.12865e+08	1.20473e+08	1.0674
Q5PR73	DIRA2	Diras2	GTP-binding protein Di-Ras2 (Distinct subgroup of the Ras family member 2)	5.04989e+08	4.96551e+08	0.983292	3.54457e+08	3.78172e+08	1.06691
Q810U4	NRCAM	Nrcam	Neuronal cell adhesion molecule (Nr-CAM) (Neuronal surface protein Bravo) (mBravo) (NgCAM-related cell adhesion molecule) (Ng-CAM-related)	1.34236e+08	1.33399e+08	0.993759	9.35016e+07	9.97513e+07	1.06684
Q8VEH6	CBWD1	Cbwd1	COBW domain-containing protein 1 (Cobalamin synthase W domain-containing protein 1)				6.66506e+06	7.11053e+06	1.06684
P62858	RS28	Rps28	40S ribosomal protein S28	4.52188e+08	1.25349e+08	0.277205	4.1899e+08	4.46908e+08	1.06663
Q9QUM9	PSA6	Psma6	Proteasome subunit alpha type-6 (Macropain iota chain) (Multicatalytic endopeptidase complex iota chain) (Proteasome iota chain)	5.4097e+08	5.51523e+08	1.01951	3.73914e+08	3.98779e+08	1.0665
P55066	NCAN	Ncan	Neurocan core protein (Chondroitin sulfate proteoglycan 3)	1.08484e+09	1.21937e+09	1.12401	1.21357e+09	1.29415e+09	1.06639
Q91VI7	RINI	Rnh1	Ribonuclease inhibitor (Ribonuclease/angiogenin inhibitor 1)	1.41419e+08	6.78948e+08	4.80096	1.92147e+08	2.04893e+08	1.06633
P63056	NOE3	Olfm3	Noelin-3 (Olfactomedin-3) (Optimedin)				6.78561e+06	7.23478e+06	1.06619
P40142	TKT	Tkt	Transketolase (TK) (EC 2.2.1.1) (P68)	1.81527e+09	1.91525e+09	1.05508	1.71364e+09	1.82692e+09	1.06611
Q8VEE1	LMCD1	Lmcd1	LIM and cysteine-rich domains protein 1				1.17276e+07	1.25024e+07	1.06607
Q99M71	EPDR1	Epdr1	Mammalian ependymin-related protein 1 (MERP-1)	2.69552e+08	2.51652e+08	0.933594	2.37349e+08	2.53009e+08	1.06598
Q6A4J8	UBP7	Usp7	Ubiquitin carboxyl-terminal hydrolase 7 (EC 3.4.19.12) (Deubiquitinating enzyme 7) (Herpesvirus-associated ubiquitin-specific protease) (mHAUSP) (Ubiquitin thioesterase 7) (Ubiquitin-specific-processing protease 7)	6.64415e+08	1.46481e+08	0.220466	8.58298e+07	9.14889e+07	1.06593
Q8VEB4	PAG15	Pla2g15	Phospholipase A2 group XV (1-O-acylceramide synthase) (ACS) (LCAT-like lysophospholipase) (LLPL) (EC 3.1.1.5) (Lysophospholipase 3) (Lysosomal phospholipase A and acyltransferase) (EC 2.3.1.-) (EC 3.1.1.32) (EC 3.1.1.4) (Lysosomal phospholipase A2) (LPLA2)	2.4252e+07	1.85747e+07	0.765904	2.83112e+07	3.01689e+07	1.06562
Q8BNL5	KCTD6	Kctd6	BTB/POZ domain-containing protein KCTD6				7.6121e+06	8.10897e+06	1.06527
S4R1M9	OSB10	Osbpl10	Oxysterol-binding protein-related protein 10 (ORP-10) (OSBP-related protein 10)	3.3222e+07	2.09815e+07	0.631552	2.84164e+07	3.02618e+07	1.06494
Q9DBT5	AMPD2	Ampd2	AMP deaminase 2 (EC 3.5.4.6) (AMP deaminase isoform L)	1.32324e+08	1.43346e+08	1.08329	1.0029e+08	1.0677e+08	1.06461
Q924M7	MPI	Mpi	Mannose-6-phosphate isomerase (EC 5.3.1.8) (Phosphohexomutase) (Phosphomannose isomerase) (PMI)	2.7348e+08	3.86242e+08	1.41232	2.59898e+08	2.76679e+08	1.06457
P62849	RS24	Rps24	40S ribosomal protein S24	1.77163e+08	2.4416e+08	1.37816	1.45719e+08	1.55122e+08	1.06453
Q8R0S4	CACB4	Cacnb4	Voltage-dependent L-type calcium channel subunit beta-4 (CAB4) (Calcium channel voltage-dependent subunit beta 4)	1.40442e+08	1.42156e+08	1.0122	1.04827e+08	1.11591e+08	1.06453
Q80VP9	ASPH2	Asphd2	Aspartate beta-hydroxylase domain-containing protein 2 (EC 1.14.11.-)	5.19008e+07	3.66441e+07	0.706042	4.66172e+07	4.96203e+07	1.06442
P58871	TB182	Tnks1bp1	182 kDa tankyrase-1-binding protein	1.01433e+08	1.33639e+08	1.31751	9.20337e+07	9.79325e+07	1.06409
Q8BLF1	NCEH1	Nceh1	Neutral cholesterol ester hydrolase 1 (NCEH) (EC 3.1.1.-) (Arylacetamide deacetylase-like 1) (Chlorpyrifos oxon-binding protein) (CPO-BP)	3.53315e+08	3.19045e+08	0.903004	3.31716e+08	3.52953e+08	1.06402
Q8C052	MAP1S	Map1s	Microtubule-associated protein 1S (MAP-1S) (BPY2-interacting protein 1) (Microtubule-associated protein 8) [Cleaved into: MAP1S heavy chain; MAP1S light chain]	1.10614e+08	1.05733e+08	0.955868	9.10647e+07	9.68776e+07	1.06383
Q3TIR1	TPC13	Trappc13	Trafficking protein particle complex subunit 13	1.38156e+07	2.7109e+07	1.9622	3.33906e+07	3.5519e+07	1.06374
[truncated: 3,660 more rows]
